# Supplementary material for: A Genetic Map for the Only Self-Fertilizing Vertebrate
Source: Oxford University Press journal article supplement (doi:10.1534/g3.115.022699), 2016-03-08
Supplement: 022699_figures2.pdf [file 022699_figures2.pdf]

# LG4

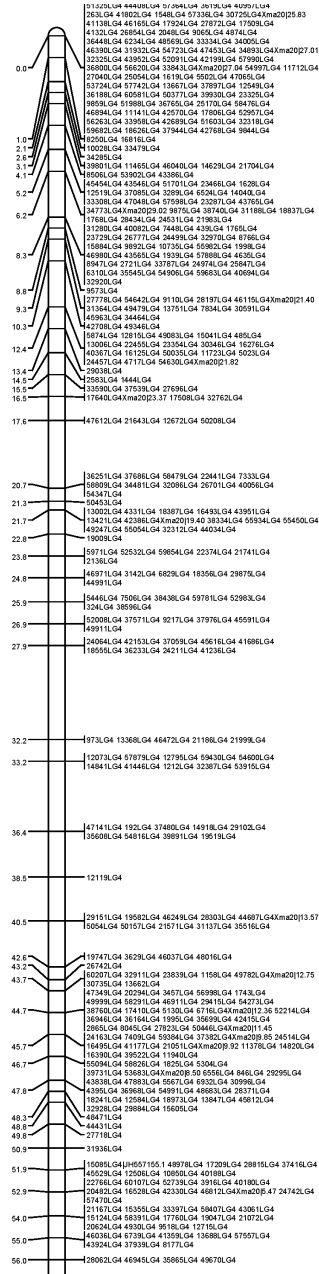

# LG5

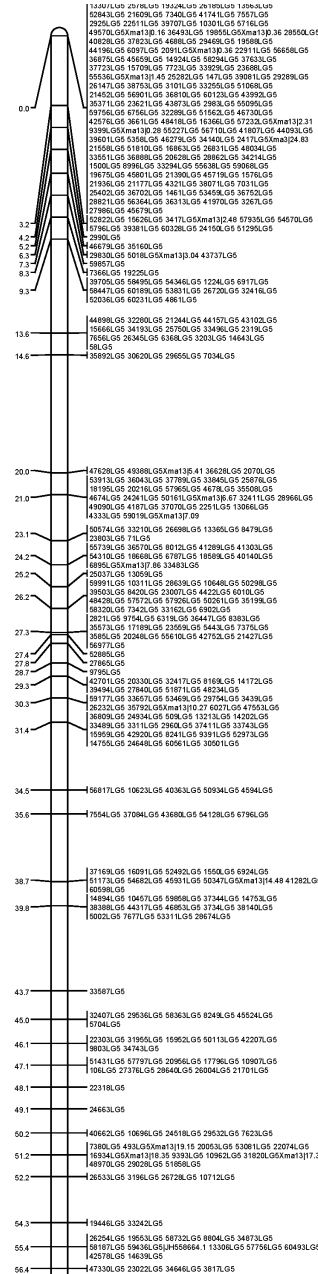

# LG6

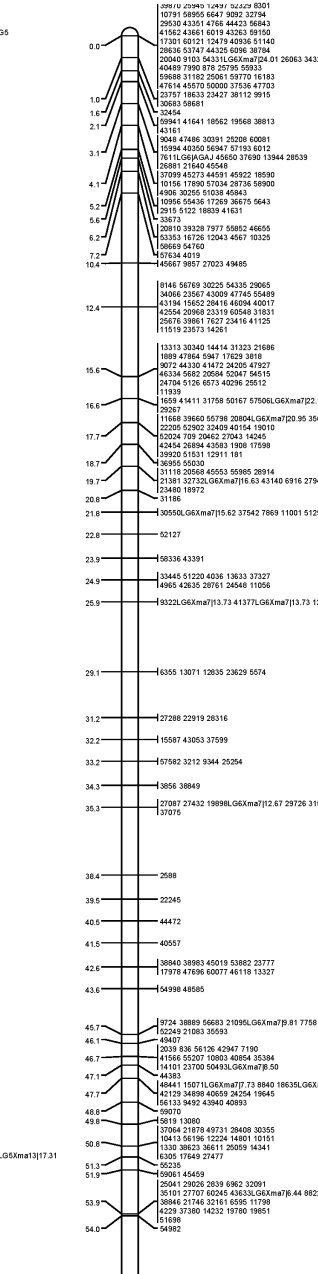

# LG7

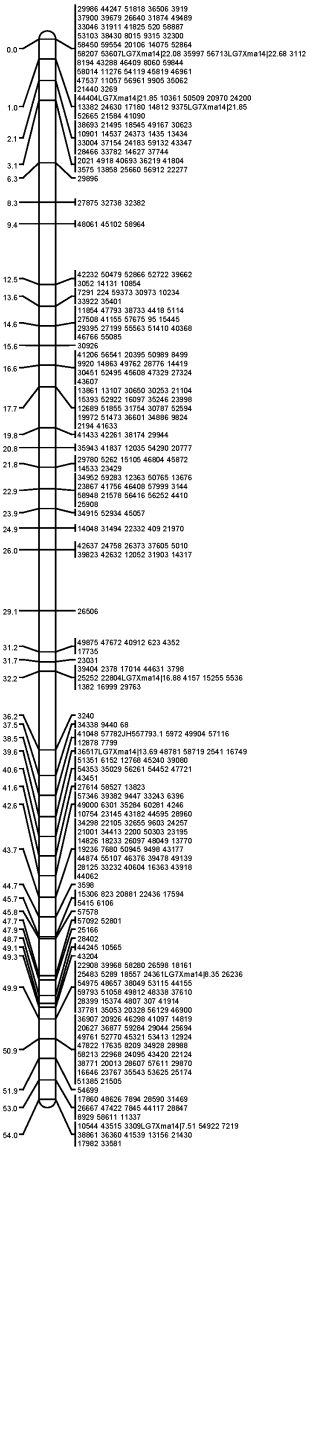

# LG8

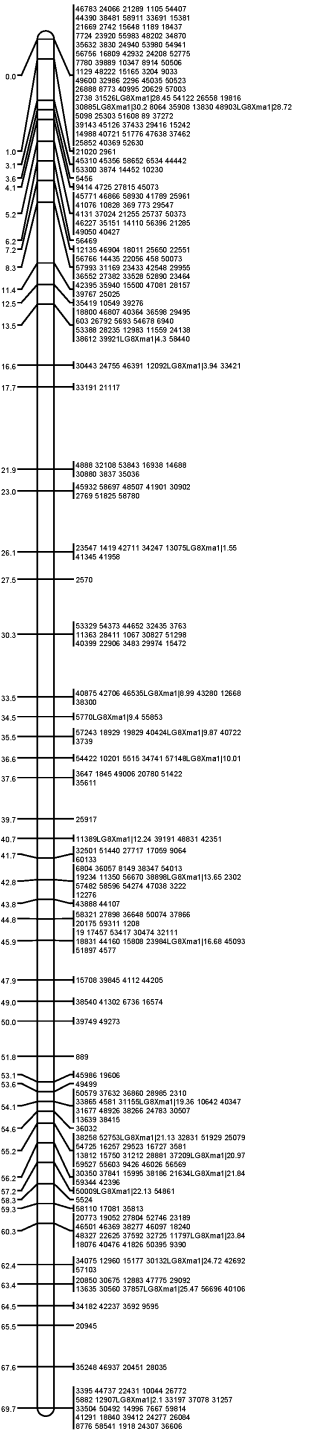

# LG9

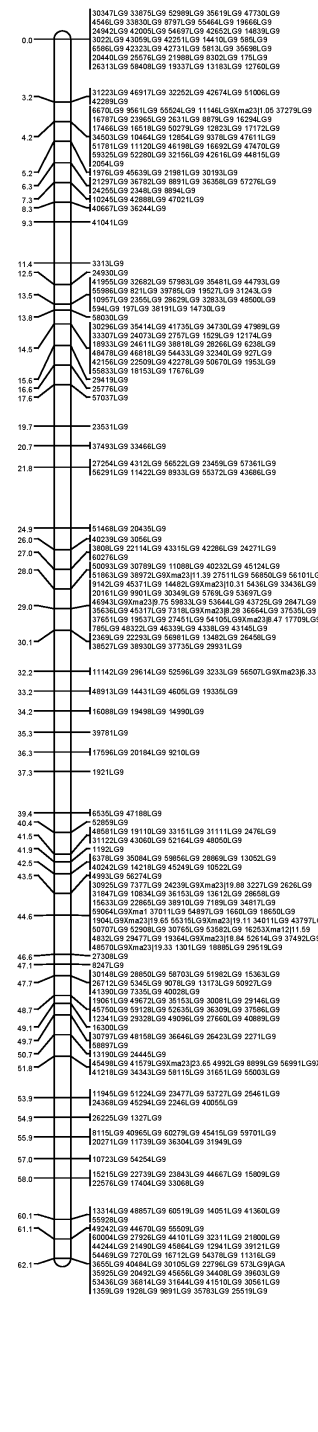

# LG10

# LG11

# LG12

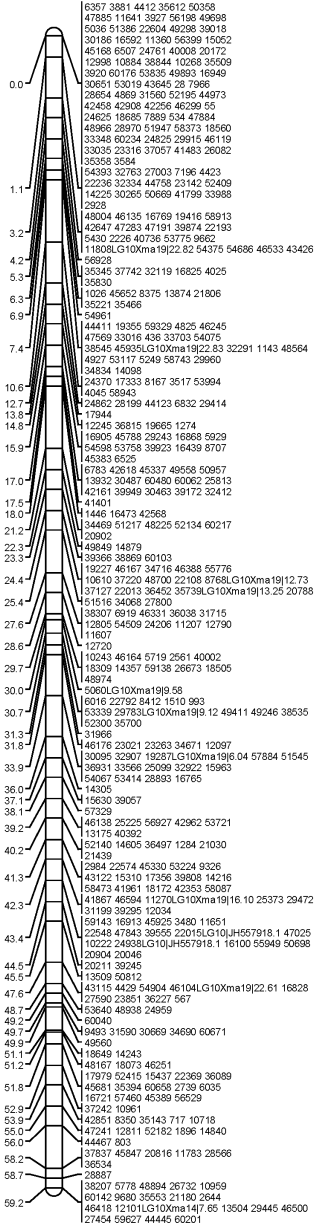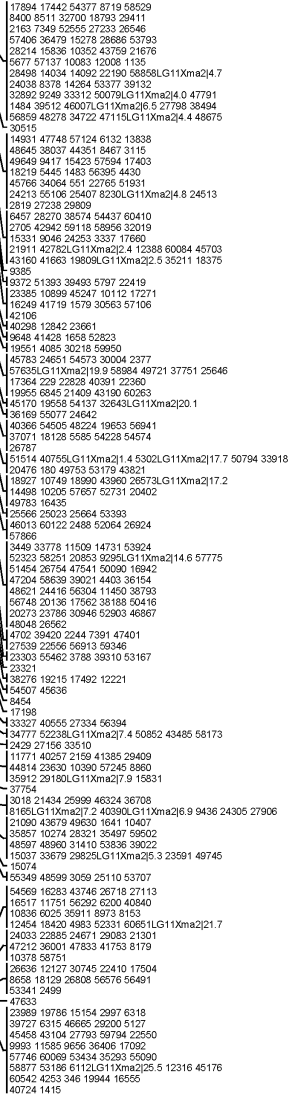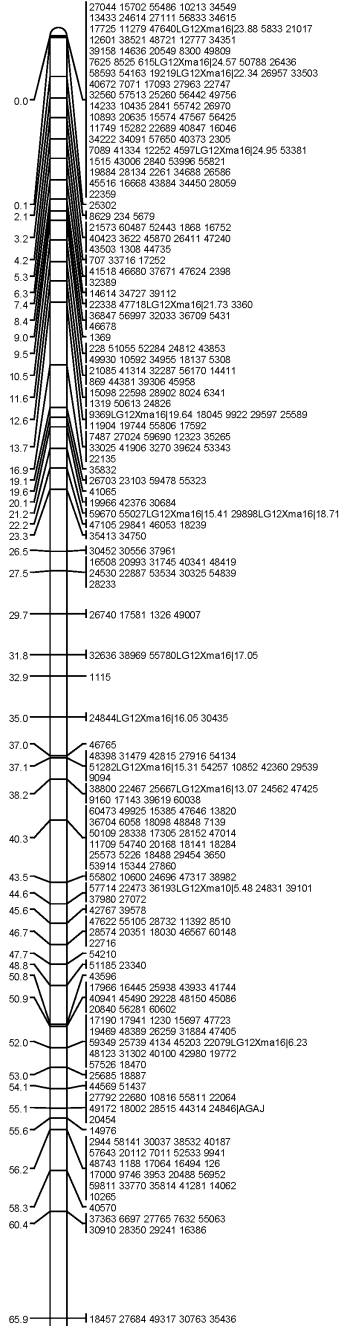

6367 3861 4412 35612 50356  
47895 1164 1327 56196 49698  
5036 51386 22604 49296 30018  
30186 16592 11360 56399 15052  
45168 6507 24761 40008 20172  
17698 18984 38844 10268 35629  
3920 60176 53835 49893 16949  
30261 53019 43645 28 7966  
28654 4869 31640 52195 44973  
42458 42908 42256 46269 55  
24625 16695 7889 534 47884  
48986 28970 51947 56373 18560  
33348 60234 24825 29915 46119  
33035 23316 37057 41483 26082  
33338 3584  
54393 32763 27003 7196 4423  
22236 32334 44758 23142 52409  
14225 30269 50669 41799 33988  
2826  
48004 46135 16769 19416 58913  
42647 47283 47191 39874 22193  
5430 2226 40786 83776 9692  
1180LGL10Xma19|22.82 54375 54686 46533 43426  
56928  
15644 37742 32119 16825 4025  
35830  
1026 45652 9375 13874 21806  
3521 35466  
54961  
44411 19356 59329 4825 46245  
47659 32016 468 33733 54075  
38545 45955LGL10Xma19|22.83 32291 1143 48564  
4927 53117 5249 58743 29960  
34834 18986  
24370 17333 8167 3517 53994  
4045 58943  
42462 26199 44123 6832 29414  
17844  
11245 36815 19666 1274  
10905 45783 29243 16968 5929  
15498 53789 89229 83703 87007  
45383 6525  
5783 42618 45337 49558 50957  
13932 30487 60490 60362 25813  
42161 39949 30463 39172 32412  
41401  
11446 16473 42668  
34469 51217 48225 52134 60217  
20902  
49849 4879  
38956 38860 60103  
19227 46167 34716 46388 55776  
10610 37220 46700 22108 8758LGL10Xma19|12.73  
37 32713 32013 85402 37638LGL10Xma19|13.25 20788  
61516 34068 27800  
38307 6919 46331 36038 31715  
12905 44069 24206 11207 12790  
11607  
12720  
11024 46164 5719 2561 40002  
18309 14357 59138 26673 18505  
48974  
6369LGL10Xma19|9.58  
6016 22792 8412 1510 993  
63339 29783LGL10Xma19|9.12 49411 49246 38535  
62300 35700  
31966  
46176 23021 23263 34671 12097  
30095 32307 16287LGL10Xma19|6.04 57884 51545  
59631 33566 20909 9322 15963  
54067 53414 28893 16765  
14305  
11600 39057  
57329  
46138 26225 56927 42962 53721  
11315 40382  
62140 14605 36497 1284 21030  
21439  
5284 22574 45330 53224 9326  
43122 15310 17356 39808 14216  
58473 41961 18172 42353 56067  
41867 46584 11270LGL10Xma19|16.10 25373 29472  
31199 39295 12034  
59143 69143 45925 3480 11651  
22548 47843 39556 22015LGL10|H557918.1 41025  
10222 24638LGL10|H557918.1 16100 55949 50698  
20904 20046  
20211 35245  
11620 60912  
43115 4429 54904 46104LGL10Xma19|22.61 16828  
27590 23851 36227 567  
63640 48939 24959  
60040  
9493 31590 36699 34690 60671  
49560  
118649 14243  
448167 18073 46251  
117919 24115 14537 22369 36089  
45681 35394 60658 2739 8035  
16721 67460 45369 56529  
57242 19681  
42651 8350 35143 717 10718  
44724 12811 52182 1896 14480  
44467 803  
17837 46847 20816 11783 29566  
36534  
28887  
38207 5778 48894 26732 10959  
60142 9680 35653 21180 2644  
46418 12101LGL10Xma17|6.5 13504 29445 46500  
27454 58627 44445 60201

17894 17442 54377 8719 58529  
9460 6511 32700 16799 29411  
2163 7349 52595 27233 26546  
57406 36479 15278 26866 53793  
28214 15836 10352 45759 21676  
5671 61737 10983 12006 1156  
28498 14034 14092 22190 58858LGL11Xma2|4.7  
24038 8378 14264 53377 39132  
32892 9240 33312 60078LGL11Xma2|4.0 47791  
1484 39512 46007LGL11Xma2|6.5 27798 38494  
56859 48278 34722 47115LGL11Xma2|4.4 48675  
30515  
14931 47748 67124 6132 13838  
48645 38037 44351 8467 3115  
49649 9417 15422 57594 17403  
18219 5445 1483 56395 4430  
45766 34064 551 22765 51931  
24213 65106 25407 8230LGL11Xma2|4.8 24513  
2819 27238 29809  
6457 28270 38574 54437 60410  
2706 42942 59118 58956 32019  
15331 9046 24253 3337 17690  
21911 42782LGL11Xma2|2.4 12388 60084 45703  
43160 41663 19809LGL11Xma2|2.5 35211 18375  
9385  
49372 51393 39493 5797 22419  
23385 19899 45247 10112 17271  
16248 41719 1579 30563 57106  
42106  
40298 12842 23661  
1964 1426 1658 52623  
13.6  
18.1  
45783 24651 54573 30004 2377  
57635LGL11Xma2|19.5 58684 49721 37751 25646  
17364 229 22826 40391 22360  
19955 6845 21409 43190 60263  
45170 19558 54157 32643LGL11Xma2|20.1  
38169 55077 24842  
40366 54505 48224 19653 56941  
37071 18128 5585 54228 54574  
26797  
51514 40765LGL11Xma2|17.7 50794 33918  
20476 180 49753 53179 43821  
18957 10749 18960 48962 28573LGL11Xma2|17.2  
14498 10205 67667 62731 20402  
49783 16435  
25566 25023 25664 63393  
46013 60122 2488 52064 26924  
157866  
3449 33778 11508 14731 53924  
52323 58251 20953 9295LGL11Xma2|14.6 57775  
51454 26754 47541 50090 16942  
47204 58659 39021 44403 36154  
46624 24416 86304 11450 35793  
56748 20136 17562 38188 50416  
20273 23786 30946 52903 46867  
49449 26562  
4702 39420 2244 7391 47401  
127539 22556 56913 58346  
23303 65462 3788 39510 53167  
23321  
38276 19215 17492 12221  
54507 45636  
8454  
17198  
33327 40555 27334 66304  
34777 52238LGL11Xma2|7.4 50852 43485 58173  
2429 27156 33510  
11771 40257 2159 14385 29409  
44614 23630 10390 57245 8860  
35912 29180LGL11Xma2|7.9 15831  
37754  
3918 21434 25999 46324 36708  
8165LGL11Xma2|7.2 40390LGL11Xma2|6.9 9436 24305 27906  
21090 43679 49630 1641 10407  
38687 10274 38321 35487 60502  
48597 48660 31410 53836 39022  
15037 33679 29825LGL11Xma2|6.3 23591 49745  
15074  
55349 48599 3059 25110 53707  
54569 16283 43746 26718 27113  
16517 11751 56292 6200 40840  
10836 8025 8911 8973 9163  
12454 18420 4983 52331 60651LGL11Xma2|21.7  
24033 22886 24671 29083 21301  
47212 36001 47833 41753 8179  
10378 58751  
28636 12127 30745 22410 17504  
8658 16129 26808 56578 56491  
53341 2499  
47633  
23989 19786 15164 2997 6318  
39727 6315 46665 29200 5127  
45458 43104 27793 58794 22550  
9993 11585 9636 36406 17052  
57746 90989 33454 52023 65690  
58877 53186 8112LGL11Xma2|25.5 12316 45176  
60542 4253 346 19944 16555  
40724 1415

27044 15702 95486 10213 34549  
13423 24614 27111 56833 34615  
17725 11279 47640LGL12Xma16|23.88 5833 21017  
12601 38521 48721 12777 24351  
38198 14636 20946 6300 48989  
7626 8026 616LGL12Xma16|24.67 40788 26436  
58593 54163 19219LGL12Xma16|22.34 26997 33503  
40672 7071 17093 27963 22747  
32660 57513 25280 56442 48756  
14233 10435 2841 55742 28970  
10893 20635 15574 47567 56425  
11749 15282 22689 40847 16046  
34222 34091 57650 40373 2305  
7089 41334 12252 4697LGL12Xma16|24.95 53381  
1515 43006 2940 53996 53621  
19884 28134 2261 34688 28586  
45516 16668 43884 34450 28059  
22369  
25302  
8629 234 5679  
21573 60487 52443 1868 16752  
40423 3622 48970 28411 47240  
43503 1308 44735  
707 33716 17262  
14518 46660 36781 47624 2398  
32389  
14614 34727 39112  
22338 47181LGL12Xma16|21.73 3360  
36847 56997 32033 36709 5431  
46676  
1369  
228 51055 52284 24812 43853  
49630 10592 34995 18137 5308  
21085 41514 32287 56170 14411  
869 44381 39306 45956  
16098 22598 28902 8024 6341  
1319 50619 24026  
1869LGL12Xma16|19.64 18045 9922 29597 25899  
11904 19744 55806 17592  
7487 27024 59690 12323 35295  
33026 4106 3270 39636 53343  
22136  
36382  
46203 23103 59478 55323  
41065  
18966 42376 30684  
16670 55202LGL12Xma16|15.41 29898LGL12Xma16|17.81  
47105 29841 46053 18239  
35413 34750  
30452 30556 37961  
16508 20593 31745 40341 48419  
24530 22887 53534 30325 54839  
28233  
26740 17581 1326 49007  
32636 38969 65780LGL12Xma16|17.05  
1115  
24844LGL12Xma16|16.05 30435  
46765  
46398 31479 42815 27916 54134  
51282LGL12Xma16|15.31 54257 10852 42380 29539  
9094  
36800 22467 25667LGL12Xma16|13.07 24562 47425  
8160 17143 39619 60039  
36704 6038 18039 48848 7139  
50105 2838 17395 28192 47014  
11709 54740 20168 18141 18284  
25573 5226 18488 29454 3650  
53914 15344 27860  
55802 10600 24696 47317 39882  
57714 22473 36193LGL12Xma16|0.48 24831 39101  
37380 27072  
42767 39578  
47622 55105 28732 11392 8510  
28574 20351 18030 46867 60148  
22716  
54210  
51185 23340  
43696  
17966 16445 25938 43933 41744  
40841 45490 29228 48150 45086  
20940 56291 60602  
17190 17941 1230 15697 47723  
19469 48389 26259 31884 47405  
58349 25739 4134 46203 22078LGL12Xma16|6.23  
48123 31302 40100 42980 19772  
57526 18470  
25685 18687  
44569 51437  
27792 22880 10816 55611 22064  
49172 18002 28515 44314 24846|AGAJ  
20454  
14976  
2944 58141 30037 38632 40187  
67043 20112 7011 52653 3941  
48743 1188 17064 16494 126  
17000 9746 3963 20488 58952  
58511 33770 35514 41231 140682  
10265  
40670  
37863 6697 27765 7630 55063  
30910 28350 29241 16386  
18457 27684 49317 30763 35436  
4586 22365 42477 21737 10396  
11022 51884 23148 26302 42048  
49157 34132 58190 17339 44461  
46433 59745 19179 33501 9961  
50163 56724 2619 42302 58912  
39102 51846 16507 50220

# LGI3

# LGI4

# LGI5

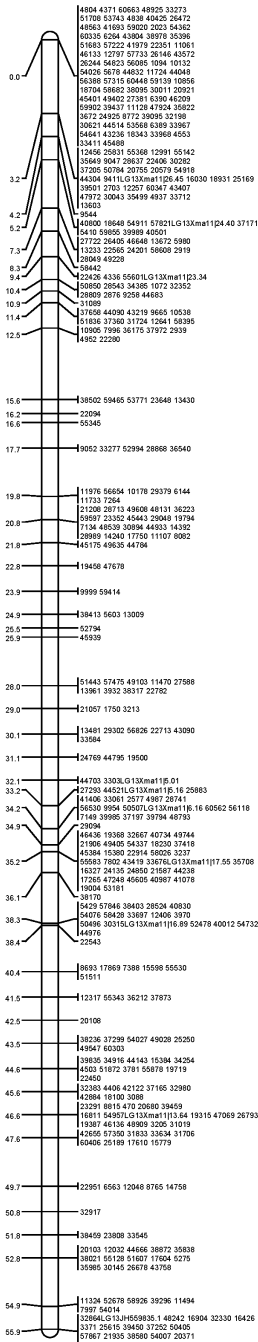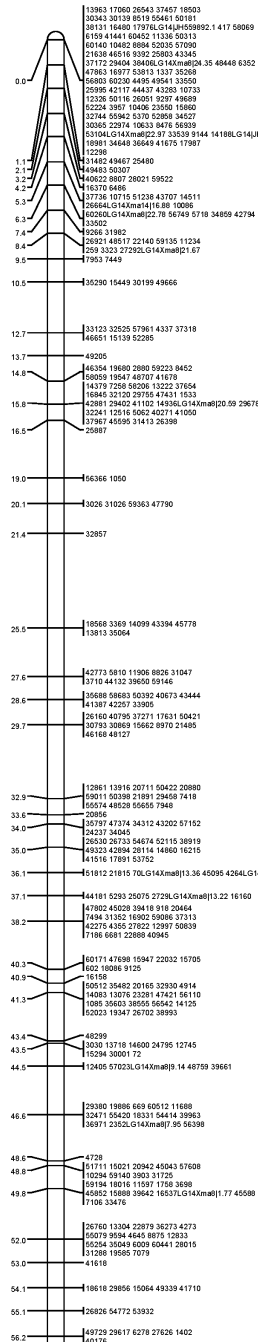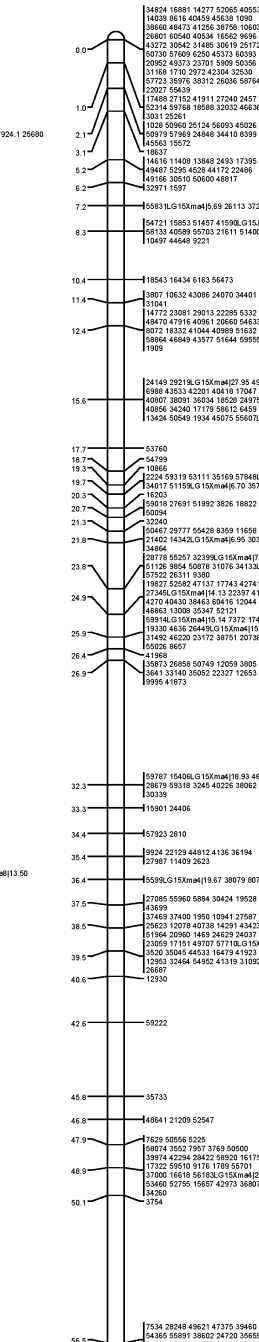

# LG16

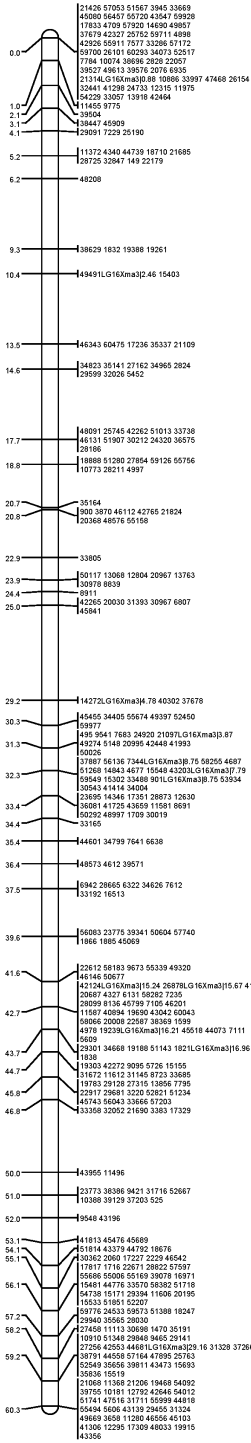

# LG17

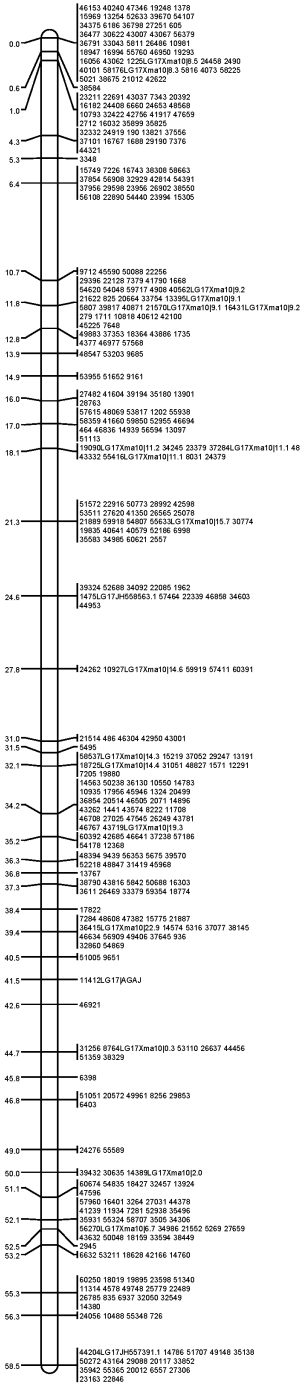

# LG18

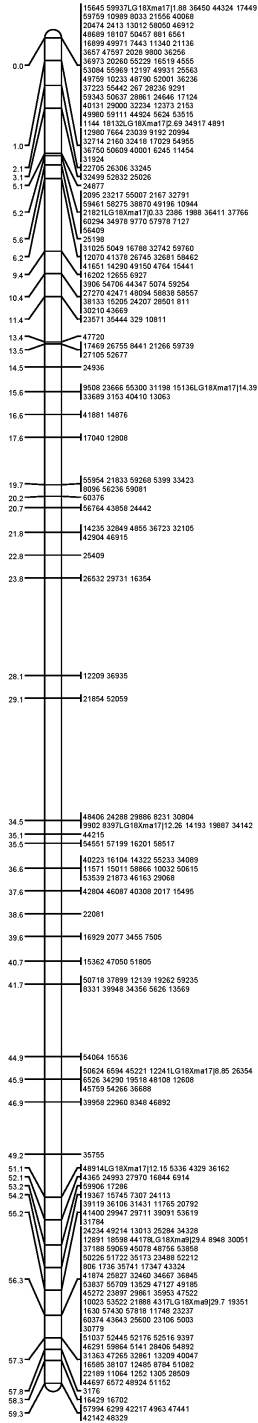

# LG19

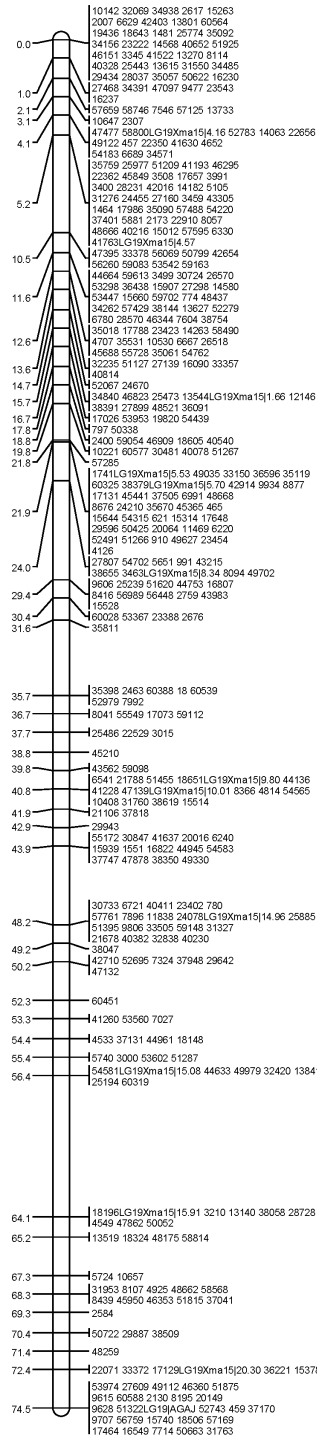

# LG20

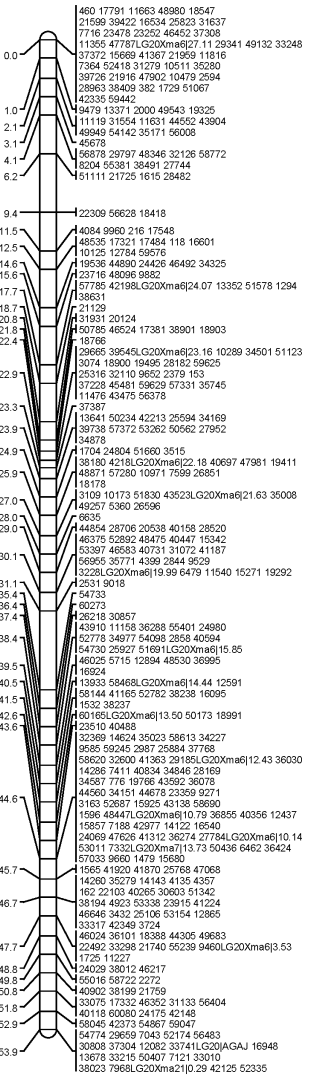

# LG21

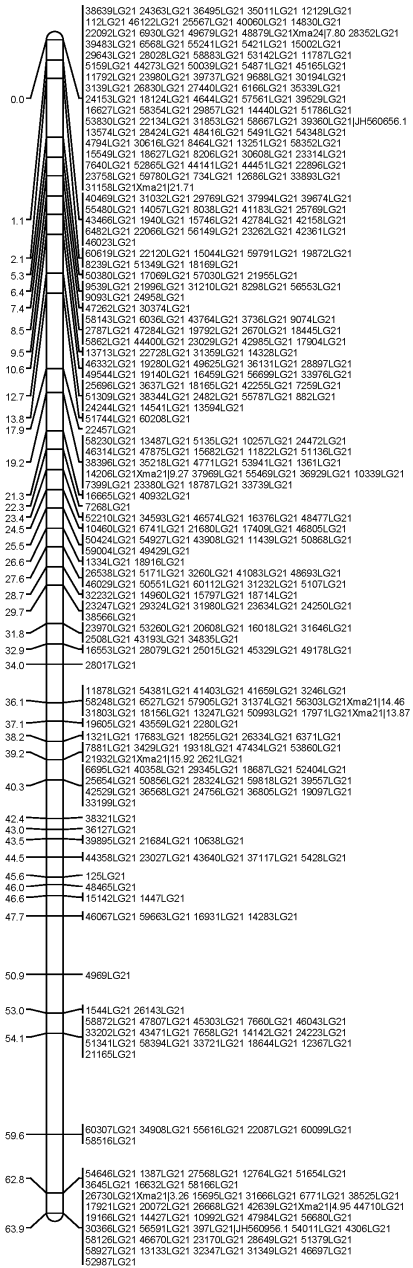

# LG22

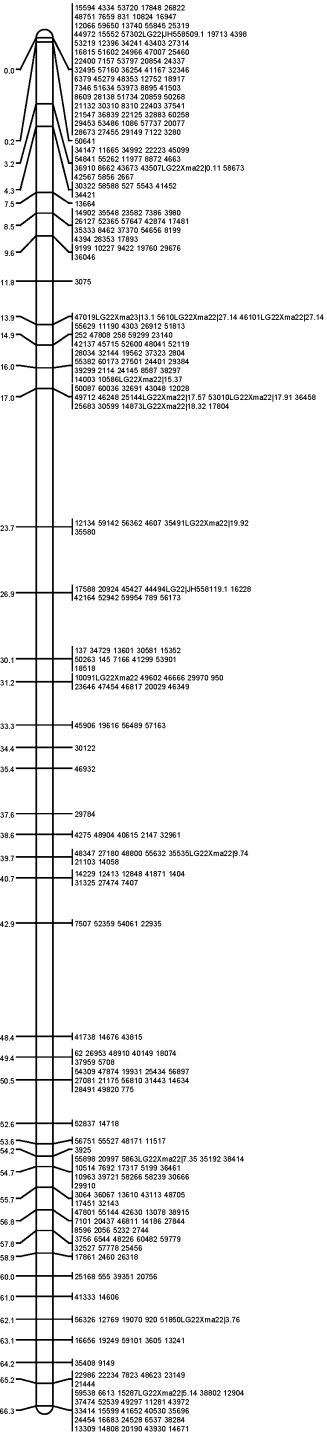

# LG23

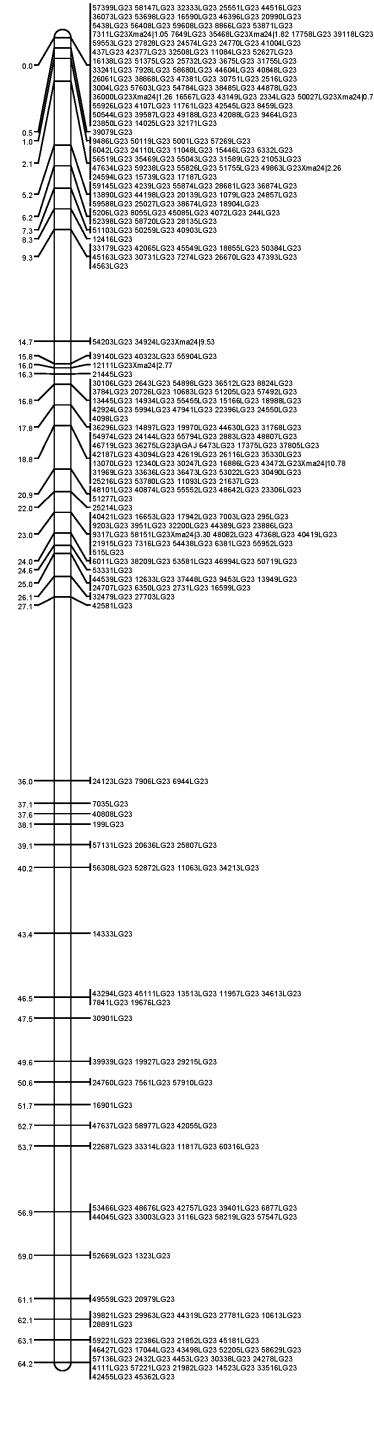

# LG24

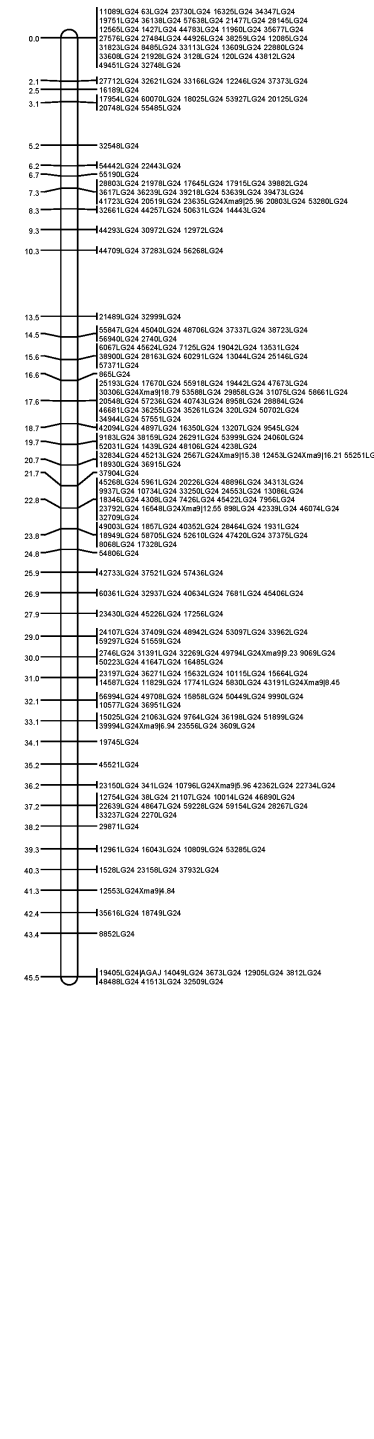



**Figure S2.** A Genetic linkage map of *Kryptplebias marmoratus*/*K. hermaphroditus* constructed with JoinMap 4.1. We obtained identical marker grouping into LGs as the PHP program and marker ordering consistent with the PHP program as shown in Figure 2.
