# Supplementary material for: A Genetic Map for the Only Self-Fertilizing Vertebrate
Source: Oxford University Press journal article supplement (doi:10.1534/g3.115.022699), 2016-03-08
Supplement: 022699_tables1.pdf [file 022699_tables1.pdf]

**Table S1. Number of tags classified by presence (1) or absence (0) in each sample.**

| sample | <i>K. marmoratus</i> |       | <i>K. hermaphroditus</i> |       | Kc    | number of tags |
|--------|----------------------|-------|--------------------------|-------|-------|----------------|
|        | DAN                  | VOL   | PAN-RS                   | HY    |       |                |
| 1      | 1                    | 1     | 1                        | 1     | 1     | 35415          |
| 0      | 1                    | 1     | 1                        | 1     | 1     | 98             |
| 1      | 0                    | 1     | 1                        | 1     | 1     | 116            |
| 1      | 1                    | 0     | 1                        | 1     | 1     | 170            |
| 1      | 1                    | 1     | 0                        | 1     | 1     | 212            |
| 1      | 1                    | 1     | 1                        | 1     | 0     | 16426          |
| 0      | 0                    | 1     | 1                        | 1     | 1     | 672            |
| 0      | 1                    | 0     | 1                        | 1     | 1     | 8              |
| 0      | 1                    | 1     | 0                        | 1     | 1     | 5              |
| 0      | 1                    | 1     | 1                        | 1     | 0     | 132            |
| 1      | 0                    | 0     | 1                        | 1     | 1     | 4              |
| 1      | 0                    | 1     | 0                        | 1     | 1     | 7              |
| 1      | 0                    | 1     | 1                        | 1     | 0     | 162            |
| 1      | 1                    | 0     | 0                        | 0     | 1     | 489            |
| 1      | 1                    | 0     | 1                        | 1     | 0     | 235            |
| 1      | 1                    | 1     | 0                        | 0     | 0     | 279            |
| 0      | 0                    | 0     | 1                        | 1     | 1     | 72             |
| 0      | 0                    | 1     | 0                        | 1     | 1     | 49             |
| 0      | 0                    | 1     | 1                        | 1     | 0     | 1752           |
| 0      | 1                    | 0     | 0                        | 0     | 1     | 38             |
| 0      | 1                    | 0     | 1                        | 1     | 0     | 33             |
| 0      | 1                    | 1     | 0                        | 0     | 0     | 22             |
| 1      | 0                    | 0     | 0                        | 0     | 1     | 22             |
| 1      | 0                    | 0     | 1                        | 1     | 0     | 29             |
| 1      | 0                    | 1     | 0                        | 0     | 0     | 45             |
| 1      | 1                    | 0     | 0                        | 0     | 0     | 1975           |
| 1      | 0                    | 0     | 0                        | 0     | 0     | 347            |
| 0      | 1                    | 0     | 0                        | 0     | 0     | 391            |
| 0      | 0                    | 1     | 0                        | 0     | 0     | 646            |
| 0      | 0                    | 0     | 1                        | 1     | 0     | 717            |
| 0      | 0                    | 0     | 0                        | 0     | 1     | 18679          |
| total  | 57214                | 57217 | 57489                    | 57361 | 56859 | 79247          |

identical 9240  
 polymorphic 26175  
 (total SNPs 53544)
