# Supplementary material for: A Genetic Map for the Only Self-Fertilizing Vertebrate
Source: Oxford University Press journal article supplement (doi:10.1534/g3.115.022699), 2016-03-08
Supplement: 022699_tables2.pdf [file 022699_tables2.pdf]

Table S2. Summary of the genetic map.

| LG        | total recombination events | total cM (Kosambi) | total markers per LG | total bins per LG | average markers gaps $\geq$ 3 per bin | average map distance between adjacent bins (cM) | recombination events per LG |   |   |     |     | P (chi square) |         |
|-----------|----------------------------|--------------------|----------------------|-------------------|---------------------------------------|-------------------------------------------------|-----------------------------|---|---|-----|-----|----------------|---------|
|           |                            |                    |                      |                   |                                       |                                                 | 4                           | 3 | 2 | 1   | 0   |                |         |
| 1         | 53                         | 54.5               | 538                  | 46                | 3                                     | 11.70                                           | 1.18                        | 0 | 1 | 14  | 22  | 12             | 0.775   |
| 2         | 53                         | 54.4               | 505                  | 47                | 3                                     | 10.74                                           | 1.16                        | 0 | 0 | 19  | 15  | 15             | * 0.018 |
| 3         | 49                         | 50.4               | 480                  | 43                | 3(2)                                  | 11.16                                           | 1.17                        | 0 | 0 | 14  | 21  | 14             | 0.607   |
| 4         | 53                         | 54.5               | 461                  | 44                | 4, 3                                  | 10.48                                           | 1.24                        | 0 | 0 | 13  | 27  | 9              | 0.559   |
| 5         | 42                         | 43.2               | 455                  | 39                | 3                                     | 11.67                                           | 1.11                        | 0 | 0 | 9   | 24  | 16             | 0.364   |
| 6         | 52                         | 53.4               | 436                  | 46                | 3(2)                                  | 9.48                                            | 1.16                        | 0 | 0 | 15  | 22  | 12             | 0.645   |
| 7         | 44                         | 45.2               | 428                  | 37                | 3(2)                                  | 11.57                                           | 1.22                        | 0 | 0 | 10  | 24  | 15             | 0.594   |
| 8         | 60                         | 61.7               | 422                  | 49                | 3(2)                                  | 8.61                                            | 1.26                        | 1 | 2 | 16  | 18  | 12             | 0.237   |
| 9         | 58                         | 59.6               | 419                  | 50                | 3                                     | 8.38                                            | 1.19                        | 0 | 0 | 19  | 20  | 10             | 0.084   |
| 10        | 47                         | 48.3               | 416                  | 43                |                                       | 9.67                                            | 1.12                        | 0 | 0 | 11  | 25  | 13             | 0.912   |
| 11        | 42                         | 43.3               | 416                  | 36                | 4, 3                                  | 11.56                                           | 1.20                        | 0 | 0 | 6   | 30  | 13             | 0.107   |
| 12        | 60                         | 61.8               | 415                  | 45                | 3(3)                                  | 9.22                                            | 1.37                        | 0 | 0 | 17  | 26  | 6              | 0.077   |
| 13        | 46                         | 47.3               | 415                  | 42                |                                       | 9.88                                            | 1.13                        | 0 | 0 | 10  | 26  | 13             | 0.759   |
| 14        | 48                         | 49.4               | 408                  | 41                |                                       | 9.95                                            | 1.20                        | 0 | 1 | 12  | 21  | 15             | 0.571   |
| 15        | 44                         | 45.3               | 400                  | 36                | 3(2)                                  | 11.11                                           | 1.26                        | 0 | 0 | 8   | 28  | 13             | 0.364   |
| 16        | 50                         | 51.4               | 399                  | 43                | 3(2)                                  | 9.28                                            | 1.20                        | 0 | 1 | 12  | 23  | 13             | 0.931   |
| 17        | 43                         | 44.2               | 399                  | 38                |                                       | 10.50                                           | 1.16                        | 0 | 0 | 8   | 27  | 14             | 0.372   |
| 18        | 47                         | 48.4               | 395                  | 41                | 4, 3                                  | 9.63                                            | 1.18                        | 0 | 0 | 15  | 17  | 17             | 0.093   |
| 19        | 59                         | 60.8               | 392                  | 48                | 5                                     | 8.17                                            | 1.27                        | 0 | 0 | 15  | 29  | 5              | 0.057   |
| 20        | 50                         | 51.5               | 382                  | 42                | 4, 3                                  | 9.10                                            | 1.23                        | 0 | 0 | 12  | 26  | 11             | 0.894   |
| 21        | 58                         | 59.8               | 377                  | 44                | 5, 4                                  | 8.57                                            | 1.36                        | 0 | 1 | 17  | 21  | 10             | 0.252   |
| 22        | 53                         | 54.7               | 370                  | 41                | 6, 3(2)                               | 9.02                                            | 1.33                        | 0 | 1 | 12  | 26  | 10             | 0.775   |
| 23        | 57                         | 59.3               | 313                  | 39                | 8, 5, 3                               | 8.03                                            | 1.52                        | 0 | 2 | 14  | 23  | 10             | 0.686   |
| 24        | 44                         | 45.2               | 263                  | 39                | 3                                     | 6.74                                            | 1.16                        | 0 | 0 | 10  | 24  | 15             | 0.594   |
| sum       | 1212                       | 1247.6             | 9904                 | 1019              | —                                     | —                                               | —                           | 1 | 9 | 308 | 565 | 293            | —       |
| (average) | (50.5)                     | (52.0)             | (412.7)              | (42.5)            |                                       | (9.76)                                          | (1.22)                      |   |   |     |     |                |         |
