# Supplementary material for: A Genetic Map for the Only Self-Fertilizing Vertebrate
Source: G3 (Bethesda). 2016 Feb 9;6(4):1095–106. doi: 10.1534/g3.115.022699 (PMC4825644; doi:10.1534/g3.115.022699)
Supplement: Supplemental Material [file supp_g3.115.022699_FileS1.xlsx]

## Sheet: marker.linked
	order of markers	representative marker	10_F2	16_F2	17_F2	18_F2	20_F2	37_F2	38_F2	39_F2	40_F2	41_F2	42_F2	43_F2	44_F2	46_F2	47_F2	48_F2	49_F2	50_F2	52_F2	53_F2	54_F2	55_F2	56_F2	57_F2	58_F2	59_F2	60_F2	61_F2	62_F2	63_F2	64_F2	67_F2	68_F2	69_F2	6_F2	71_F2	72_F2	73_F2	74_F2	75_F2	76_F2	78_F2	79_F2	80_F2	81_F2	85_F2	86_F2
LG1	1	610	h	b	h	h	a	a	b	b	b	h	a	a	a	h	a	h	h	h	h	h	b	a	a	h	a	h	b	h	h	a	h	h	h	h	b	a	a	a	b	b	h	h	b	h	h	h	a
LG1	2	31116	h	b	h	h	a	a	b	b	b	h	a	a	a	b	a	h	h	h	h	h	b	a	a	h	a	h	b	h	h	a	h	h	h	h	b	a	a	a	b	b	h	h	b	h	h	h	a
LG1	3	11547	h	b	h	h	a	a	b	b	b	h	a	a	a	b	a	h	h	h	h	h	b	a	a	h	a	h	b	h	h	a	h	h	h	h	b	a	a	a	h	b	h	h	b	h	h	h	a
LG1	4	1691	h	b	h	h	a	a	b	b	b	h	a	a	a	b	a	h	h	h	h	h	b	a	a	h	a	h	b	h	h	a	h	h	h	h	b	a	a	a	h	b	h	b	b	h	h	h	a
LG1	5	34737	h	b	h	h	a	a	b	b	b	h	a	a	a	b	a	h	h	h	h	h	b	a	a	h	a	h	h	h	h	a	h	h	h	h	b	a	a	a	h	b	h	b	b	h	h	h	a
LG1	6	10804	h	b	h	h	a	a	b	b	b	h	a	a	a	b	a	h	h	h	h	h	b	a	a	a	a	h	h	h	h	a	h	h	h	h	b	a	a	a	h	b	h	b	b	h	h	h	a
LG1	7	1457	h	b	h	h	a	a	b	b	b	h	a	a	a	b	a	h	h	h	b	h	b	a	a	a	a	h	h	h	h	a	h	h	h	h	b	a	a	a	h	b	h	b	b	h	h	h	a
LG1	8	15631	h	b	h	h	a	a	b	b	b	h	a	a	a	b	h	h	h	h	b	h	b	a	a	a	a	h	h	h	h	a	h	h	h	h	b	a	a	a	h	b	h	b	b	h	h	h	a
LG1	9	732	h	b	h	h	a	a	b	b	b	h	a	a	a	b	h	h	h	h	b	h	b	h	a	a	a	h	h	h	h	a	h	h	h	h	b	a	a	a	h	b	h	b	b	h	h	h	a
LG1	10	58445	h	b	h	h	a	a	b	b	b	h	a	a	a	b	h	h	h	h	b	h	b	h	a	a	a	h	h	h	h	a	h	h	h	h	b	a	a	a	h	h	h	b	b	h	h	h	a
LG1	11	3229	h	b	h	h	a	a	b	b	b	h	a	a	a	b	h	h	h	h	b	h	b	h	a	a	a	h	h	h	h	a	h	h	h	h	b	a	a	a	h	h	h	b	b	b	h	h	a
LG1	12	13457	a	b	h	h	a	a	b	b	b	h	a	a	a	b	h	h	h	h	b	h	b	h	a	a	a	h	h	h	h	a	h	h	h	h	b	a	a	a	h	h	h	b	b	b	h	h	a
LG1	13	186	a	b	h	h	a	a	b	b	b	h	a	a	a	b	h	h	h	h	b	h	b	h	a	a	a	h	h	a	h	a	h	h	h	h	b	a	a	a	h	h	h	b	b	b	h	h	a
LG1	14	13274	a	b	h	h	a	a	b	b	b	h	a	a	a	b	h	h	h	h	b	h	b	h	a	a	a	h	h	a	h	a	h	a	h	h	b	h	a	a	h	h	h	b	b	b	h	h	a
LG1	15	8890	a	b	h	h	a	a	b	b	b	h	a	a	a	b	h	h	h	h	b	h	b	h	a	a	a	h	h	a	h	a	h	a	h	h	h	h	a	a	h	h	h	b	b	b	h	h	a
LG1	16	1847	a	b	h	h	a	a	b	b	b	h	a	a	a	b	h	h	h	h	b	h	b	h	a	a	a	h	h	a	h	a	h	a	h	h	h	h	a	a	h	h	h	b	h	b	h	h	a
LG1	17	557	a	b	h	h	a	a	b	b	b	h	a	a	a	b	h	h	h	h	b	h	b	h	a	a	a	h	h	a	h	a	h	a	h	h	h	h	a	a	h	h	h	b	h	b	h	a	a
LG1	18	34524	a	b	h	h	a	a	b	b	b	h	a	a	a	b	h	h	h	h	b	h	b	h	a	a	a	h	h	a	h	a	h	a	h	h	h	h	a	a	h	h	h	b	h	b	h	a	h
LG1	19	30117	a	b	h	h	a	a	b	b	b	h	a	a	a	b	h	h	h	h	b	h	b	h	h	a	a	h	h	a	h	a	h	a	h	h	h	h	a	a	h	h	h	b	h	b	h	a	h
LG1	20	28604	a	h	h	h	a	a	b	b	b	h	a	a	a	b	h	h	h	h	b	h	b	h	h	a	a	h	h	a	b	a	h	a	h	h	a	h	a	a	h	h	h	b	h	b	h	a	h
LG1	21	3918	a	h	h	h	a	h	b	b	b	h	a	a	a	b	h	h	h	h	b	h	b	h	h	a	a	h	h	a	b	a	h	a	h	h	a	h	a	a	h	h	h	b	h	b	h	a	h
LG1	22	56855	a	h	h	h	a	h	b	b	b	h	a	a	a	b	h	h	h	h	b	h	b	h	h	a	a	h	h	a	b	a	b	a	h	h	a	h	a	a	h	h	h	b	h	b	h	a	h
LG1	23	7585	a	h	h	h	a	h	b	b	b	h	a	a	a	b	h	h	h	h	b	h	b	b	h	a	a	h	h	a	b	a	b	a	h	h	a	h	a	a	h	h	h	b	h	b	h	a	h
LG1	24	7195	a	h	h	h	a	h	b	b	b	h	a	a	a	b	h	h	h	h	b	h	b	b	h	a	a	h	h	a	b	a	b	a	h	h	a	h	a	a	h	h	a	b	h	b	h	a	h
LG1	25	1829	a	h	h	h	a	h	b	b	b	h	a	a	a	b	h	h	h	h	b	a	b	b	h	a	a	h	h	a	b	a	b	a	h	h	a	h	a	a	h	h	a	b	h	b	h	a	h
LG1	26	34395	a	h	h	h	a	h	b	b	b	h	a	a	a	b	h	h	h	h	b	a	b	b	h	a	a	h	h	a	b	a	b	a	h	h	a	a	a	a	h	h	a	b	h	b	h	a	h
LG1	27	8205	a	h	h	h	a	h	b	b	b	h	a	a	a	b	h	h	h	h	b	a	b	b	h	a	a	h	h	a	b	a	b	a	h	h	a	a	h	a	h	h	a	b	h	b	h	a	h
LG1	28	8002	a	h	h	h	a	h	b	b	b	h	a	a	a	b	h	h	h	h	b	a	b	b	h	a	a	h	h	h	b	a	b	a	h	h	a	a	h	a	h	h	a	b	h	b	h	a	h
LG1	29	230	a	h	h	h	a	h	b	b	b	h	a	a	a	b	h	h	h	h	b	a	h	b	h	a	h	h	h	h	b	a	b	a	h	h	a	a	h	a	h	h	a	b	h	b	h	a	h
LG1	30	733	a	h	h	h	a	h	b	b	b	h	a	a	a	b	h	h	h	h	b	a	h	b	b	a	h	h	h	h	b	a	b	a	h	h	a	a	h	a	h	h	a	b	h	b	h	a	h
LG1	31	20623	a	h	h	h	h	h	b	b	b	h	a	a	a	b	h	h	h	h	b	a	h	b	b	a	h	h	h	h	h	a	b	a	h	h	a	a	h	a	h	h	a	b	h	b	h	a	h
LG1	32	20826	a	h	h	h	h	h	b	b	b	h	a	a	h	b	h	h	h	h	b	a	h	b	b	a	h	h	h	h	h	a	b	a	h	h	a	a	h	a	h	h	a	b	h	b	h	a	h
LG1	33	16730	a	h	h	h	h	h	b	b	b	h	a	a	h	b	h	h	h	h	b	a	h	b	b	a	h	a	h	h	h	a	b	a	h	h	a	a	h	a	h	h	a	b	h	b	h	a	h
LG1	34	522	a	h	h	h	h	h	b	b	b	h	a	a	h	b	h	h	h	h	b	a	h	b	b	a	h	a	h	h	h	a	b	a	h	b	a	a	h	a	h	h	a	b	h	b	h	a	h
LG1	35	44866	a	h	h	h	h	h	b	b	b	h	a	a	h	b	h	h	h	h	b	a	h	b	b	h	h	a	h	h	h	a	b	a	h	b	a	a	h	a	h	h	a	b	h	b	h	a	h
LG1	36	2453	a	h	h	h	h	h	b	b	b	h	a	a	h	b	h	h	h	h	b	a	h	b	b	h	h	a	h	h	h	a	b	a	h	b	a	a	h	a	b	h	a	b	h	b	h	a	h
LG1	37	16491	a	h	h	h	h	h	b	b	b	h	a	a	h	b	h	h	h	b	b	a	h	b	b	h	h	a	h	h	h	a	b	a	h	b	a	a	h	a	b	h	a	b	h	b	h	a	h
LG1	38	24018	a	h	h	h	h	h	b	b	b	h	a	a	h	b	h	h	h	b	b	a	h	b	b	h	h	a	h	h	h	a	b	a	h	b	a	h	h	a	b	h	a	b	h	b	h	a	h
LG1	39	1948	a	h	h	h	h	h	b	b	b	h	a	a	h	b	h	b	h	b	b	a	h	b	b	h	h	a	h	h	h	a	b	a	h	b	a	h	h	a	b	h	a	b	h	b	h	a	h
LG1	40	37568	a	h	h	h	h	h	b	b	b	h	a	a	h	b	h	b	h	b	b	a	a	b	b	h	h	a	h	h	h	a	b	a	h	b	a	h	h	a	b	h	a	b	h	b	h	a	h
LG1	41	17315	a	h	h	h	h	h	b	b	b	h	a	h	h	b	h	b	h	b	b	a	a	b	b	h	h	a	h	h	h	a	b	a	h	b	a	h	h	a	b	h	a	b	h	b	h	a	h
LG1	42	4081	a	a	h	h	h	h	b	b	b	h	a	h	h	b	h	b	h	b	b	a	a	b	b	h	h	a	h	h	h	a	b	a	h	b	a	h	h	a	b	h	a	b	h	b	h	a	h
LG1	43	16371	a	a	h	a	h	h	b	b	b	h	a	h	h	b	h	b	h	b	b	a	a	b	b	h	h	a	h	h	h	a	b	a	h	b	a	h	h	a	b	h	a	b	h	h	h	a	h
LG1	44	37014	a	a	h	a	h	h	b	b	b	h	a	h	h	h	h	b	h	b	b	a	a	b	b	h	h	a	h	h	h	a	b	a	h	b	a	h	h	a	b	h	a	b	h	h	h	a	h
LG1	45	8739	a	a	h	a	h	h	b	b	b	h	a	h	h	h	h	b	h	b	b	a	a	b	b	h	h	a	h	h	h	a	b	a	h	b	a	h	b	a	b	b	a	b	h	h	h	a	h
LG1	46	1235	h	a	h	a	h	h	b	b	b	h	a	h	h	h	h	b	h	b	b	a	a	b	b	h	h	a	h	h	h	h	b	a	h	b	a	h	b	a	b	b	a	b	h	h	h	a	h
		total recombination events per LG	2	2	0	1	1	1	0	0	0	0	0	1	1	2	1	1	0	1	1	1	2	2	2	2	1	1	1	2	2	1	1	1	0	1	2	3	2	0	2	2	1	1	1	2	0	1	1
LG1		24452	a	a	h	h	h	h	b	b	b	h	a	h	h	b	h	h	h	b	b	a	a	b	b	h	h	a	h	h	h	a	b	a	h	b	a	h	h	a	b	h	a	b	h	b	h	a	h
			10_F2	16_F2	17_F2	18_F2	20_F2	37_F2	38_F2	39_F2	40_F2	41_F2	42_F2	43_F2	44_F2	46_F2	47_F2	48_F2	49_F2	50_F2	52_F2	53_F2	54_F2	55_F2	56_F2	57_F2	58_F2	59_F2	60_F2	61_F2	62_F2	63_F2	64_F2	67_F2	68_F2	69_F2	6_F2	71_F2	72_F2	73_F2	74_F2	75_F2	76_F2	78_F2	79_F2	80_F2	81_F2	85_F2	86_F2
LG2	1	6122	a	a	h	a	b	h	h	b	h	h	h	h	a	b	b	h	h	b	h	h	h	b	h	b	b	h	h	h	a	a	b	h	h	b	h	a	a	h	h	h	b	a	h	b	a	h	h
LG2	2	25705	a	a	h	a	b	h	h	b	h	h	h	h	a	b	b	h	h	b	h	h	h	b	h	b	b	h	h	h	a	a	b	h	h	b	h	a	a	h	h	h	b	a	h	b	a	b	h
LG2	3	1032	a	a	h	a	b	h	h	b	h	h	h	h	a	b	b	h	h	b	h	h	h	b	h	b	b	h	h	h	a	a	b	h	h	b	h	a	a	h	h	h	b	a	h	b	a	b	h
LG2	4	2203	a	a	h	a	b	h	h	b	h	h	h	h	a	b	b	h	h	b	h	h	h	b	h	b	b	h	h	h	a	a	b	h	h	h	h	a	a	h	h	h	b	a	h	b	a	b	h
LG2	5	5464	a	a	h	a	b	h	h	b	h	h	h	h	a	b	b	h	h	b	h	h	h	b	h	b	b	h	h	h	a	a	b	h	h	h	h	a	a	h	h	h	b	a	h	b	a	b	b
LG2	6	11754	a	a	h	a	b	h	h	b	h	h	h	h	a	b	b	h	h	b	h	h	h	b	h	b	b	h	h	h	a	a	b	h	h	h	h	a	a	h	b	h	b	a	h	b	a	b	b
LG2	7	15783	a	a	h	a	b	h	h	b	h	h	h	h	a	b	b	h	a	b	h	h	h	b	h	b	b	h	h	h	a	a	b	h	h	h	h	a	a	h	b	h	b	a	h	b	a	b	b
LG2	8	1130	a	a	h	a	b	h	h	b	h	h	h	h	a	b	b	h	a	b	h	h	h	b	h	b	b	h	h	h	a	a	b	h	h	h	h	a	h	h	b	h	b	a	h	b	a	b	b
LG2	9	5527	a	a	h	a	b	h	h	b	h	h	h	h	a	b	b	h	a	b	h	h	h	b	a	b	b	h	h	h	a	a	b	h	h	h	h	a	h	h	b	h	b	a	h	b	a	b	b
LG2	10	7492	a	a	h	a	b	h	h	b	h	h	h	h	a	b	b	h	a	b	a	h	h	b	a	b	b	h	h	h	a	a	b	h	h	h	h	a	h	h	b	h	b	a	h	b	a	b	b
LG2	11	32273	a	a	h	a	b	h	h	b	h	h	h	h	a	b	b	h	a	b	a	h	h	b	a	b	b	h	h	h	a	a	b	h	h	h	a	a	h	h	b	h	b	a	h	b	a	b	b
LG2	12	5978	a	a	h	a	h	h	h	b	h	h	h	h	a	b	b	h	a	b	a	h	h	b	a	b	b	h	h	h	a	a	b	h	h	h	a	a	h	h	b	h	b	a	h	b	a	b	b
LG2	13	31321	a	a	h	a	h	h	h	b	h	h	h	h	a	b	b	h	a	b	a	h	h	b	a	b	b	h	h	h	h	a	b	h	h	h	a	a	b	h	b	h	b	a	h	b	h	b	b
LG2	14	8341	a	a	h	a	h	h	h	b	h	h	h	h	a	b	b	h	a	b	a	h	h	b	a	b	b	h	h	h	h	a	b	h	b	h	a	a	b	h	b	h	b	a	h	b	h	b	b
LG2	15	4129	a	a	h	a	h	h	h	b	h	h	h	h	a	b	b	h	a	b	a	h	h	b	a	b	b	h	h	h	h	a	b	h	b	h	a	a	b	h	b	h	b	a	h	b	b	b	b
LG2	16	5569	a	a	h	a	h	h	h	b	h	h	h	h	a	b	b	h	a	b	a	h	h	b	a	b	b	h	h	h	h	a	b	h	b	h	a	h	b	h	b	h	b	a	h	b	b	b	b
LG2	17	15935	a	a	h	a	h	h	h	b	h	h	h	h	a	b	b	h	a	b	a	h	h	b	a	b	b	h	h	h	h	a	b	h	b	h	a	h	b	h	b	h	b	h	h	b	b	b	b
LG2	18	8145	a	a	h	a	h	h	h	b	h	h	h	h	a	b	b	h	a	b	a	h	h	b	a	h	b	h	h	h	h	a	b	h	b	h	a	h	b	h	b	h	b	h	h	b	b	b	b
LG2	19	90	a	a	h	a	h	h	h	b	h	h	h	h	h	b	b	h	a	b	a	h	h	b	a	h	b	h	h	h	h	a	b	h	b	h	a	h	b	h	b	h	b	h	h	b	b	b	b
LG2	20	50053	a	a	h	a	h	h	h	b	h	h	h	h	h	b	b	h	a	b	a	h	h	b	a	a	b	h	h	h	h	a	b	h	b	h	a	h	b	h	b	h	b	h	h	b	b	b	b
LG2	21	10846	a	a	h	a	h	h	h	b	h	h	h	h	h	b	b	h	a	b	a	h	h	b	a	a	b	h	h	h	h	a	b	h	b	h	a	h	b	h	b	h	h	h	h	b	b	b	b
LG2	22	1732	a	a	h	a	h	h	h	b	h	h	h	h	h	b	b	h	a	b	a	h	h	b	a	a	b	h	h	h	h	a	b	h	b	h	a	h	b	h	b	h	h	h	h	b	b	b	h
LG2	23	6546	a	a	h	a	h	h	h	b	h	h	h	h	h	b	b	h	a	b	a	h	h	b	a	a	b	h	h	h	h	a	b	h	b	h	a	b	b	h	b	h	h	h	b	b	b	b	h
LG2	24	1637	a	a	h	a	h	h	h	b	h	h	h	h	h	b	b	h	a	b	a	h	h	b	a	a	b	h	h	h	h	a	b	h	b	h	h	b	b	h	b	h	h	h	b	b	b	b	h
LG2	25	13912	a	a	h	a	h	h	h	b	h	h	h	h	h	b	b	h	a	b	a	h	b	b	a	a	b	h	h	h	h	a	b	h	b	h	h	b	b	h	b	h	h	h	b	b	b	b	h
LG2	26	2454	a	a	h	a	h	h	h	b	h	h	h	h	h	b	b	h	a	b	a	h	b	b	a	a	b	h	h	h	h	a	b	h	b	h	h	b	b	h	b	h	h	b	b	b	b	b	h
LG2	27	11295	a	a	h	a	h	h	h	b	h	h	h	h	h	b	b	h	a	b	a	h	b	h	a	a	b	h	h	h	h	a	b	h	b	h	h	b	b	h	b	h	h	b	b	b	b	b	h
LG2	28	48053	a	a	h	a	h	h	h	b	h	h	h	h	h	b	b	h	a	b	a	h	b	h	a	a	b	h	h	h	h	a	b	h	b	h	h	b	b	h	b	b	h	b	b	b	b	b	h
LG2	29	6005	a	a	h	a	h	h	h	b	h	h	h	h	h	b	b	h	a	b	a	h	b	h	a	a	b	h	h	h	h	a	b	h	b	h	h	b	b	h	b	b	h	b	b	b	b	b	h
LG2	30	1727	a	a	h	a	h	h	h	b	h	h	h	h	h	b	b	h	a	b	a	h	b	h	a	a	b	h	h	h	h	a	b	h	b	h	h	b	b	h	b	b	h	b	b	h	b	b	h
LG2	31	35452	a	a	h	a	h	h	h	b	h	h	h	h	h	b	b	h	a	b	a	a	b	h	a	a	b	h	h	h	h	a	b	h	b	h	h	b	b	h	b	b	h	b	b	h	b	b	h
LG2	32	19696	a	a	h	a	h	h	h	b	h	h	b	h	h	b	b	h	a	b	a	a	b	h	a	a	b	h	h	h	h	a	b	h	b	h	h	b	b	h	b	b	h	b	b	h	b	b	h
LG2	33	36689	a	a	h	a	h	h	h	b	h	h	h	h	h	b	b	h	a	b	a	a	b	h	a	a	b	h	a	h	h	a	b	h	b	h	h	b	b	h	b	b	h	b	b	h	b	b	h
LG2	34	5320	a	a	h	a	h	h	h	b	h	h	h	h	h	b	b	h	a	b	a	a	b	h	a	a	b	h	a	h	h	a	b	h	b	h	h	b	b	h	b	b	h	b	h	h	b	b	h
LG2	35	8035	a	a	h	a	a	h	h	b	h	h	h	h	h	b	b	h	a	b	a	a	b	h	a	a	b	h	a	h	h	a	b	h	b	h	h	b	b	h	b	b	h	b	h	h	b	b	h
LG2	36	2181	a	a	h	a	a	h	h	b	h	h	h	h	h	b	b	h	a	b	a	a	b	a	a	a	b	h	a	h	h	a	b	h	b	h	h	b	b	h	b	b	h	b	h	h	b	b	h
LG2	37	5914	a	a	h	a	a	h	h	b	h	h	h	h	h	b	b	h	a	b	a	a	b	a	a	a	b	h	a	h	h	h	b	h	b	h	h	b	b	h	b	b	h	b	h	h	b	b	h
LG2	38	1124	a	a	h	a	a	h	h	b	h	h	h	h	h	b	b	h	a	b	a	a	b	a	a	a	b	h	a	h	h	h	b	h	b	a	h	b	b	h	b	b	h	b	h	h	b	b	h
LG2	39	736	a	a	h	a	a	h	h	b	h	h	h	h	h	b	b	h	a	b	h	a	b	a	a	a	b	h	a	h	h	h	b	h	b	a	h	b	b	h	b	b	h	b	h	h	b	b	h
LG2	40	4915	a	a	h	a	a	h	h	b	h	h	h	h	h	b	b	h	a	b	h	a	b	a	a	a	h	h	a	h	h	h	b	h	b	a	h	b	b	h	b	b	h	b	h	h	b	h	h
LG2	41	4653	a	a	h	a	a	h	h	b	h	h	h	h	h	h	b	h	a	b	h	a	b	a	a	a	h	h	a	h	h	h	b	h	b	a	h	b	b	h	b	b	h	b	h	h	b	h	h
LG2	42	56874	a	a	h	a	a	h	h	b	h	h	h	h	h	h	b	h	a	b	h	a	b	a	h	a	h	h	a	h	h	h	b	h	b	a	h	b	b	h	b	b	h	b	h	h	b	h	h
LG2	43	46	a	a	h	a	a	h	h	b	h	h	h	h	h	a	b	h	a	b	h	a	b	a	h	a	h	h	a	h	h	h	b	h	b	a	h	b	b	h	b	b	h	b	h	h	b	h	h
LG2	44	5028	a	a	h	a	a	h	h	h	h	h	h	h	h	a	b	h	a	b	h	a	b	a	h	a	h	h	a	h	h	h	b	h	b	a	h	b	b	h	b	b	h	b	h	h	b	h	h
LG2	45	10997	a	a	h	a	a	h	h	h	h	h	h	h	b	a	b	h	a	b	h	a	b	a	h	a	h	h	a	h	h	h	b	h	b	a	h	b	b	h	b	b	h	b	h	h	b	h	h
LG2	46	34789	a	a	h	a	a	h	h	h	b	h	h	h	b	a	b	h	a	b	h	a	b	a	h	a	h	h	a	h	h	h	b	h	b	a	h	b	b	h	b	b	h	b	h	h	b	h	h
LG2	47	1052	a	a	b	a	a	h	h	h	b	h	h	h	b	a	b	h	a	b	h	a	b	a	h	a	h	h	a	h	h	h	b	h	b	a	h	b	b	h	b	b	h	b	h	h	b	h	h
		total recombination events per LG	0	0	1	0	2	0	0	1	1	0	2	0	2	2	0	0	1	0	2	1	1	2	2	2	1	0	1	0	1	1	0	0	1	2	2	2	2	0	1	1	1	2	2	1	2	2	2
			10_F2	16_F2	17_F2	18_F2	20_F2	37_F2	38_F2	39_F2	40_F2	41_F2	42_F2	43_F2	44_F2	46_F2	47_F2	48_F2	49_F2	50_F2	52_F2	53_F2	54_F2	55_F2	56_F2	57_F2	58_F2	59_F2	60_F2	61_F2	62_F2	63_F2	64_F2	67_F2	68_F2	69_F2	6_F2	71_F2	72_F2	73_F2	74_F2	75_F2	76_F2	78_F2	79_F2	80_F2	81_F2	85_F2	86_F2
LG3	1	1823	h	h	h	b	h	b	h	b	h	b	h	h	b	a	h	h	a	b	a	h	a	a	h	a	a	h	h	h	h	h	a	h	a	b	h	h	h	h	b	b	b	h	b	h	h	b	b
LG3	2	17988	h	h	h	b	h	b	h	b	h	b	h	h	b	a	h	h	a	b	a	h	a	a	h	a	a	h	h	h	h	h	h	h	a	b	h	h	h	h	b	b	b	h	b	h	h	b	b
LG3	3	46237	h	h	h	b	h	b	h	b	h	b	h	h	b	a	h	h	a	b	a	b	a	a	h	a	a	h	h	h	h	h	h	h	a	b	h	h	h	h	b	b	b	h	b	h	h	b	b
LG3	4	3288	h	h	h	b	h	b	h	b	h	b	h	h	b	a	a	h	a	b	a	b	a	a	h	a	a	h	h	h	h	h	h	h	a	b	h	h	h	h	b	b	b	h	b	h	h	b	b
LG3	5	1952	h	h	h	b	h	b	h	b	h	b	h	h	b	a	a	h	a	b	a	b	a	a	h	a	a	h	h	h	h	h	h	h	a	b	h	h	h	h	b	h	b	h	b	h	h	b	b
LG3	6	16539	h	h	h	b	h	b	h	b	h	h	h	h	b	a	a	h	a	b	a	b	a	a	h	a	a	h	h	h	h	h	h	h	a	b	h	h	h	h	b	h	b	h	b	h	h	b	b
LG3	7	4372	h	h	h	b	h	b	h	b	h	h	h	h	b	a	a	h	a	b	a	b	a	a	b	a	a	h	h	h	h	h	h	h	a	b	h	h	h	h	b	h	b	h	b	h	h	b	b
LG3	8	8905	h	h	h	b	h	b	h	b	h	h	h	h	b	a	a	h	a	b	a	b	a	a	b	a	a	h	h	h	h	h	h	h	a	b	h	h	h	h	b	h	b	h	b	h	a	b	b
LG3	9	584	h	h	h	b	h	b	h	b	h	h	h	h	b	a	a	h	a	b	a	b	a	a	b	h	a	h	h	h	h	h	h	h	a	b	h	h	h	h	b	h	b	h	b	h	a	b	b
LG3	10	1201	h	h	h	b	h	b	h	b	h	h	h	h	b	a	a	h	a	b	a	b	a	h	b	h	a	h	h	h	h	h	h	h	a	b	h	h	h	h	b	h	b	h	b	h	a	b	b
LG3	11	5450	h	h	h	b	h	b	h	b	h	h	h	h	b	a	a	h	a	b	a	b	a	h	b	h	a	h	h	h	h	h	h	h	a	b	h	h	h	h	b	h	b	h	b	h	a	b	b
LG3	12	4747	h	h	h	b	h	b	h	b	h	h	h	h	h	a	a	h	a	b	a	b	a	h	b	h	a	h	h	h	h	h	h	h	a	b	h	h	h	h	b	h	b	h	b	h	a	b	b
LG3	13	10501	h	h	h	b	a	b	h	b	h	h	h	h	h	a	a	h	a	b	a	b	a	h	b	h	a	h	h	h	h	h	h	h	a	b	h	h	h	h	b	h	b	h	b	h	a	b	b
LG3	14	8556	h	h	h	b	a	b	h	b	h	h	h	h	h	a	a	h	a	b	a	b	a	h	b	h	a	h	h	h	h	h	h	h	a	b	h	h	h	h	b	h	b	h	b	h	a	b	h
LG3	15	16096	a	h	h	b	a	b	h	b	h	h	h	h	h	a	a	h	a	b	a	b	a	h	b	h	a	h	h	h	h	h	h	h	a	b	h	h	h	h	b	h	b	h	b	h	a	b	h
LG3	16	3415	a	h	h	b	a	b	h	b	h	h	h	h	h	a	a	h	a	b	a	b	a	h	b	h	a	h	h	h	b	h	h	h	a	b	h	h	h	h	b	h	b	h	b	h	a	b	h
LG3	17	11625	a	h	h	b	a	b	h	b	h	h	h	h	h	a	a	h	a	b	a	b	a	h	b	h	a	h	h	h	b	h	h	h	a	b	h	h	h	h	b	h	b	h	b	a	a	b	h
LG3	18	23626	a	h	h	b	a	b	h	b	h	h	h	h	h	a	a	h	a	b	a	b	a	h	b	h	a	h	a	h	b	h	h	h	a	b	h	h	h	h	b	h	b	h	b	a	a	b	h
LG3	19	8238	a	h	h	b	a	b	h	b	h	h	h	h	h	a	a	h	a	b	a	b	a	h	b	h	a	h	a	b	b	h	h	h	a	b	h	h	h	h	b	h	b	h	b	a	a	b	h
LG3	20	6588	a	h	h	b	a	b	h	b	h	h	h	b	h	a	a	h	a	b	a	b	a	h	b	h	a	h	a	b	b	h	h	h	a	b	h	h	h	h	b	h	b	h	b	a	a	b	h
LG3	21	8431	a	h	h	b	a	b	h	b	h	h	h	b	h	a	a	h	a	b	a	b	a	h	b	h	h	h	a	b	b	h	h	h	a	b	h	h	h	h	b	h	b	h	b	a	a	b	h
LG3	22	7892	a	h	h	b	a	b	h	b	h	h	h	h	h	a	a	h	a	b	a	b	a	h	b	h	h	h	a	b	b	h	h	h	a	b	h	h	h	h	b	h	b	h	b	a	a	b	h
LG3	23	6137	a	h	h	b	a	b	h	b	h	h	h	h	h	a	a	h	h	b	a	b	a	h	b	h	h	h	a	b	b	h	h	h	a	b	h	h	h	h	b	h	b	h	b	a	a	b	h
LG3	24	56074	a	h	h	b	a	b	h	b	h	h	h	h	h	a	a	h	h	b	a	b	a	h	h	h	h	h	a	b	b	h	h	h	a	b	h	h	h	h	b	h	b	h	b	a	a	b	h
LG3	25	2157	a	h	h	b	a	b	h	b	h	h	h	h	h	a	a	h	h	b	a	b	a	h	h	h	h	h	a	b	b	h	h	h	a	b	b	h	h	h	b	h	b	h	b	a	a	b	h
LG3	26	25050	a	h	h	b	a	b	h	h	h	h	h	h	h	a	a	h	h	b	a	b	a	h	h	h	h	h	a	b	b	h	h	h	a	b	b	h	h	h	b	h	b	h	b	a	a	b	h
LG3	27	56397	a	h	h	b	a	b	h	h	h	h	h	h	h	a	a	h	h	b	a	b	a	h	h	h	h	h	a	b	b	h	h	h	a	b	b	h	h	h	h	h	b	h	b	a	a	b	h
LG3	28	32023	a	h	h	b	a	b	h	h	h	h	h	h	h	a	h	h	h	b	a	b	a	h	h	h	b	h	a	b	b	h	h	h	a	b	b	h	h	h	h	h	b	h	b	a	a	b	h
LG3	29	15505	a	h	h	b	a	b	h	h	h	h	h	h	h	a	h	h	h	b	a	b	a	h	h	h	b	h	a	b	b	h	h	h	a	b	h	h	h	h	h	h	b	h	b	a	a	b	h
LG3	30	6054	a	h	h	b	a	b	h	h	b	h	h	h	h	a	h	h	h	b	a	b	a	h	h	h	b	h	a	b	b	h	h	h	a	b	h	h	h	h	h	h	b	h	b	a	a	b	h
LG3	31	46179	a	h	h	b	a	b	h	h	b	h	h	h	h	a	h	h	h	b	a	b	a	h	h	h	b	h	a	b	b	h	h	h	a	b	h	h	h	h	h	a	b	h	b	a	a	b	h
LG3	32	2661	a	h	h	b	a	b	h	h	b	h	h	h	h	a	h	h	h	b	a	h	a	h	h	h	b	h	a	b	h	h	h	h	a	b	h	h	h	h	h	a	b	h	b	a	a	b	h
LG3	33	17940	a	h	h	b	a	b	a	h	b	h	h	h	h	a	h	h	h	b	a	h	h	h	h	h	b	h	a	b	h	h	h	h	a	b	h	h	h	h	h	a	b	h	b	a	a	b	h
LG3	34	5517	a	h	h	b	a	b	a	h	b	h	h	h	h	a	h	h	h	h	a	h	h	h	h	h	b	h	a	b	h	h	h	a	a	b	h	h	h	h	h	a	b	h	b	a	a	b	a
LG3	35	47689	a	h	h	b	a	b	a	h	b	h	h	h	h	a	h	h	h	h	a	h	h	h	h	h	b	h	a	b	h	h	h	a	a	b	h	h	h	h	h	a	b	h	b	a	a	h	a
LG3	36	40384	a	h	h	b	h	b	a	h	b	h	h	h	h	a	h	h	h	h	a	h	h	h	h	h	b	h	a	b	h	h	h	a	a	b	h	h	h	h	h	a	b	h	b	a	a	h	a
LG3	37	31204	a	h	h	b	h	b	a	h	b	h	h	h	h	a	h	h	h	h	a	h	h	h	h	h	b	h	a	b	h	h	h	a	a	b	h	h	h	h	h	a	b	h	b	a	a	a	a
LG3	38	53618	a	h	h	b	h	h	a	h	b	h	h	h	h	a	h	h	h	h	a	h	h	h	h	h	b	h	a	b	h	h	h	a	a	b	h	h	a	h	h	a	h	h	b	a	a	a	a
LG3	39	337	a	h	h	b	h	h	a	h	b	h	h	h	h	a	h	h	h	h	a	h	h	h	h	h	b	h	a	b	h	h	b	a	a	b	h	h	a	h	h	a	h	h	b	a	a	a	a
LG3	40	56417	a	h	h	b	h	h	a	h	h	h	h	h	h	a	h	h	h	h	a	h	h	h	h	h	b	h	a	b	h	h	b	a	a	b	h	h	a	h	h	a	h	h	b	a	a	a	a
LG3	41	820	a	h	h	b	h	h	a	h	h	h	h	h	h	a	h	h	h	h	a	h	h	h	h	h	b	h	h	b	h	h	b	a	a	b	h	h	a	h	h	a	h	h	b	a	a	a	a
LG3	42	3914	a	h	h	b	h	h	a	h	h	h	h	h	h	a	h	h	h	h	a	h	h	h	h	h	b	h	h	b	h	h	b	a	a	b	h	h	a	b	h	a	h	h	b	a	a	a	a
LG3	43	3454	a	h	h	b	h	h	a	h	h	h	h	h	h	a	h	h	h	h	a	h	h	h	h	h	b	h	h	b	h	h	b	a	h	b	h	h	a	b	h	a	h	h	b	a	a	a	a
		total recombination events per LG	1	0	0	0	2	1	1	1	2	1	0	2	1	0	2	0	1	1	0	2	1	1	2	1	2	0	2	1	2	0	2	1	1	0	2	0	1	1	1	2	1	0	0	1	1	2	2
			10_F2	16_F2	17_F2	18_F2	20_F2	37_F2	38_F2	39_F2	40_F2	41_F2	42_F2	43_F2	44_F2	46_F2	47_F2	48_F2	49_F2	50_F2	52_F2	53_F2	54_F2	55_F2	56_F2	57_F2	58_F2	59_F2	60_F2	61_F2	62_F2	63_F2	64_F2	67_F2	68_F2	69_F2	6_F2	71_F2	72_F2	73_F2	74_F2	75_F2	76_F2	78_F2	79_F2	80_F2	81_F2	85_F2	86_F2
LG4	1	1619	h	b	b	b	a	h	b	b	b	h	h	a	h	h	a	h	h	b	h	a	b	b	h	b	b	b	h	a	h	b	a	h	b	b	h	b	h	b	h	b	a	h	b	h	h	b	h
LG4	2	16816	h	b	b	b	a	h	b	b	b	h	h	a	h	h	a	h	h	b	h	a	b	b	h	b	h	b	h	a	h	b	a	h	b	b	h	b	h	b	h	b	a	h	b	h	h	b	h
LG4	3	10028	h	b	b	b	a	h	b	b	b	h	h	a	h	h	a	h	h	b	h	a	b	b	h	b	h	b	h	a	h	b	a	h	b	b	h	b	h	b	h	b	h	h	b	h	h	b	h
LG4	4	11465	h	b	b	b	a	h	b	b	b	h	a	a	h	h	a	h	h	b	h	a	b	b	h	b	h	b	h	a	h	b	a	h	b	b	h	b	h	b	h	b	h	h	b	h	h	b	h
LG4	5	8506	h	b	b	b	a	h	b	b	b	h	a	a	h	h	a	h	h	b	h	h	b	b	h	b	h	b	h	a	h	b	a	h	b	b	h	b	h	b	h	b	h	h	b	h	h	b	h
LG4	6	1628	h	b	b	b	a	h	b	b	b	h	a	a	h	h	a	h	h	b	h	h	b	b	a	b	h	b	h	a	h	b	a	h	b	b	h	b	h	b	h	b	h	h	b	h	h	b	h
LG4	7	439	h	b	b	b	a	h	b	b	b	h	a	a	h	h	a	h	h	b	h	h	b	b	a	b	h	b	h	a	h	b	a	h	b	b	a	b	h	b	h	b	h	h	b	h	h	b	h
LG4	8	7834	h	b	b	b	a	h	b	b	b	h	a	a	h	h	a	h	h	b	h	h	b	b	a	b	h	b	a	a	h	b	a	h	b	b	a	b	h	b	h	b	h	h	b	h	h	b	h
LG4	9	42708	h	h	b	b	a	h	b	b	b	h	a	a	h	h	a	h	h	b	h	h	b	b	a	b	h	b	a	a	h	b	a	h	b	b	a	b	h	b	h	b	h	h	b	h	h	b	h
LG4	10	485	h	h	b	b	a	h	b	b	b	h	a	a	h	h	a	h	h	b	h	h	b	b	a	b	h	b	a	a	h	b	a	h	b	b	a	b	h	b	b	b	h	h	b	b	h	b	h
LG4	11	29038	h	h	b	b	a	h	b	b	b	h	a	a	h	h	a	h	h	b	h	h	b	b	a	b	h	b	a	a	h	b	a	h	b	h	a	b	h	b	b	b	h	h	b	b	h	b	h
LG4	12	1444	h	h	b	b	a	h	b	b	b	h	a	a	h	h	a	h	h	h	h	h	b	b	a	b	h	b	a	a	h	b	a	h	b	h	a	b	h	b	b	b	h	h	b	b	h	b	h
LG4	13	27696	b	h	b	b	a	h	b	b	b	h	a	a	h	h	a	h	h	h	h	h	b	b	a	b	h	b	a	a	h	b	a	h	b	h	a	b	h	b	b	b	h	h	b	b	h	b	h
LG4	14	17640	b	h	b	b	a	h	h	b	b	h	a	a	h	h	a	h	h	h	h	h	b	b	a	b	h	b	a	a	h	b	a	h	b	h	a	b	h	b	b	b	h	h	b	b	h	b	h
LG4	15	12672	b	h	b	b	a	h	h	b	b	h	a	a	h	h	a	h	h	h	h	h	b	b	a	b	h	b	a	h	h	b	a	h	b	h	a	b	h	b	b	b	h	h	b	b	h	b	h
LG4	16	7333	b	h	b	b	a	h	h	b	b	a	a	h	h	h	a	h	h	h	h	b	b	b	a	b	h	b	a	h	h	b	a	h	b	h	a	b	h	b	b	b	h	h	b	b	h	b	h
LG4	17	4331	b	h	b	b	a	h	h	b	h	a	a	h	h	h	a	h	h	h	h	b	b	b	a	b	h	b	a	h	h	b	a	h	b	h	a	b	h	b	b	b	h	h	b	b	h	b	h
LG4	18	19009	b	h	b	b	a	h	h	b	h	a	a	h	h	h	a	h	h	h	h	b	b	b	a	b	h	b	h	h	h	b	a	h	b	h	a	b	h	b	b	b	h	h	b	b	h	b	h
LG4	19	2136	h	h	b	b	a	h	h	b	h	a	a	h	h	h	a	h	h	h	h	b	b	b	a	b	h	b	h	h	h	b	a	h	b	h	a	b	h	b	b	b	h	h	b	b	h	b	h
LG4	20	3142	h	h	b	b	a	h	h	b	h	a	a	h	h	h	a	h	h	h	h	b	b	b	a	b	h	b	h	h	h	b	a	h	b	h	a	b	h	h	b	b	h	h	b	b	h	b	h
LG4	21	324	h	h	b	b	a	h	a	b	h	a	a	h	h	h	a	h	h	h	h	b	b	b	a	b	h	b	h	h	h	b	a	h	b	h	a	b	h	h	b	b	h	h	b	b	h	b	h
LG4	22	9217	h	h	b	b	a	h	a	b	h	a	a	h	h	h	a	h	h	h	h	b	b	b	a	b	h	b	h	h	h	b	a	h	b	h	a	b	h	h	b	b	h	h	b	b	h	b	a
LG4	23	18555	h	h	b	b	h	h	a	b	h	a	a	h	h	h	a	h	h	h	h	b	b	b	a	b	h	b	h	h	h	b	a	h	b	h	a	b	h	h	b	b	h	h	b	b	h	b	a
LG4	24	13368	h	h	b	b	h	h	a	b	h	a	a	h	h	h	a	h	h	h	h	b	b	b	a	b	h	b	h	h	h	b	a	h	h	a	a	b	h	h	b	b	h	h	b	b	h	b	a
LG4	25	1212	h	h	b	b	h	h	a	b	h	a	a	h	h	b	a	h	h	h	h	b	b	b	a	b	h	b	h	h	h	b	a	h	h	a	a	b	h	h	b	b	h	h	b	b	h	b	a
LG4	26	192	h	h	b	b	h	h	a	b	h	a	a	h	h	b	a	h	h	h	h	b	b	b	a	b	h	b	h	h	h	h	a	h	h	a	a	b	h	h	b	b	h	h	b	b	h	b	a
LG4	27	12119	h	h	b	b	h	h	a	b	h	a	a	h	h	b	h	h	h	h	h	b	b	b	a	b	h	b	h	h	h	a	a	h	h	a	a	b	h	h	b	b	h	h	b	b	h	b	a
LG4	28	5054	h	h	b	b	h	h	a	b	h	a	a	h	a	b	h	h	h	h	h	b	b	b	a	b	h	b	h	h	h	a	a	h	h	a	a	b	h	h	b	b	h	h	b	b	h	b	a
LG4	29	46037	h	h	b	b	h	h	a	b	h	a	h	h	a	b	h	h	h	h	a	b	b	b	a	b	h	b	h	h	h	a	a	h	h	a	a	b	h	h	b	b	h	h	b	b	h	b	a
LG4	30	1158	h	h	b	b	h	a	a	b	h	a	h	h	a	b	h	h	h	h	a	b	b	b	a	b	h	b	h	h	h	a	a	h	h	a	a	b	h	h	b	b	h	h	b	b	h	b	a
LG4	31	1743	h	h	b	b	h	a	a	b	h	a	h	h	a	b	h	h	h	h	a	b	b	b	a	b	h	b	h	h	h	a	a	h	h	a	a	b	h	h	h	b	h	h	b	b	h	b	a
LG4	32	7409	h	h	b	h	h	a	a	b	h	a	h	h	a	b	h	h	h	h	a	b	b	b	a	b	h	b	h	h	h	a	a	h	h	a	a	b	h	h	h	b	h	h	b	b	h	b	a
LG4	33	5304	h	h	b	h	h	a	a	b	h	a	h	h	a	b	h	h	h	h	a	b	b	b	a	b	h	b	h	h	h	a	a	b	h	a	a	b	h	h	h	b	h	h	b	b	h	b	a
LG4	34	846	h	h	b	a	h	a	a	b	h	a	h	h	a	b	h	h	h	h	a	b	b	b	a	b	h	b	h	h	h	a	a	b	h	a	a	b	h	h	h	b	h	h	b	b	h	b	a
LG4	35	44431	h	h	h	a	h	a	a	b	h	a	h	h	a	b	h	h	h	h	a	b	b	b	a	b	h	b	h	h	h	a	a	b	h	a	a	b	h	h	h	b	h	h	b	b	h	b	a
LG4	36	27718	h	h	h	a	h	a	a	b	h	a	h	h	a	b	h	h	h	h	a	b	b	b	a	b	h	b	h	h	h	a	a	b	h	a	a	b	h	h	h	b	h	h	h	b	h	b	a
LG4	37	31936	h	h	h	a	h	a	a	b	h	h	h	h	a	b	h	h	h	h	a	b	b	b	a	b	h	b	h	h	h	a	a	b	h	a	a	b	h	h	h	b	h	h	h	b	h	b	a
LG4	38	10850	h	h	h	a	h	a	a	b	h	h	h	h	a	b	h	h	h	h	a	b	b	b	a	b	h	b	h	h	h	a	a	b	h	a	a	h	h	h	h	b	h	h	h	b	h	b	a
LG4	39	3916	h	h	h	a	h	a	a	b	h	h	h	h	a	b	b	h	h	h	a	b	b	b	a	b	h	b	h	h	h	a	a	b	h	a	a	h	h	h	h	b	h	h	h	b	h	b	a
LG4	40	9518	h	h	h	a	h	a	a	b	h	h	h	h	a	b	b	h	h	h	a	b	b	b	a	b	h	b	h	h	h	a	a	b	h	a	a	h	h	h	h	h	h	h	h	b	h	b	a
LG4	41	6739	h	h	h	a	h	a	a	b	h	h	h	h	a	b	b	h	h	h	a	b	h	b	a	b	h	b	h	h	h	a	a	b	h	a	a	h	h	h	h	h	h	h	h	b	h	b	a
LG4	42	28062	h	h	h	a	h	h	a	b	h	h	h	h	a	b	b	h	h	h	a	b	h	b	a	b	h	b	h	h	h	a	a	b	h	a	a	h	h	h	h	h	h	h	h	b	h	b	a
LG4	43	28301	h	h	h	a	h	h	a	h	h	h	h	h	a	b	b	h	h	h	a	b	h	b	a	b	h	b	h	a	b	a	a	b	h	a	a	h	h	h	h	h	h	b	h	b	h	b	a
LG4	44	4570	h	h	h	a	h	h	a	h	h	h	h	h	a	b	b	h	h	h	a	b	h	h	a	b	h	b	h	a	b	a	a	b	h	a	a	h	h	h	h	h	h	b	h	b	h	b	a
		total recombination events per LG	2	1	1	2	1	2	2	1	1	2	2	1	1	1	2	0	0	1	1	2	1	1	1	0	1	0	2	2	1	2	0	1	1	2	1	1	0	1	2	1	1	1	1	1	0	0	1
			10_F2	16_F2	17_F2	18_F2	20_F2	37_F2	38_F2	39_F2	40_F2	41_F2	42_F2	43_F2	44_F2	46_F2	47_F2	48_F2	49_F2	50_F2	52_F2	53_F2	54_F2	55_F2	56_F2	57_F2	58_F2	59_F2	60_F2	61_F2	62_F2	63_F2	64_F2	67_F2	68_F2	69_F2	6_F2	71_F2	72_F2	73_F2	74_F2	75_F2	76_F2	78_F2	79_F2	80_F2	81_F2	85_F2	86_F2
LG5	1	147	h	b	h	h	h	a	h	h	h	h	h	h	h	h	h	h	b	h	a	a	h	h	a	b	a	a	h	a	h	h	a	h	b	h	h	h	h	h	h	h	h	h	h	a	a	h	h
LG5	2	3417	h	b	h	h	h	a	h	h	h	h	h	h	h	h	h	h	b	h	a	a	h	h	a	b	a	a	h	a	h	h	a	h	b	h	h	h	h	h	h	h	h	h	h	a	a	h	b
LG5	3	2990	h	b	h	h	h	a	h	h	h	h	h	h	h	h	h	h	b	h	a	a	h	h	a	b	a	a	h	a	h	h	a	a	b	h	h	h	h	h	h	h	h	h	h	a	a	h	b
LG5	4	35160	h	b	h	h	h	a	h	h	h	h	h	h	h	h	h	h	b	h	a	a	h	h	a	b	a	a	h	a	h	h	a	a	b	h	h	h	h	h	h	h	h	h	h	a	a	h	b
LG5	5	5018	h	b	h	h	h	a	h	h	h	h	a	h	h	h	h	h	b	h	a	a	h	h	a	b	a	a	h	a	h	h	a	a	b	h	h	h	h	h	h	h	h	h	h	a	a	h	b
LG5	6	59857	h	b	h	h	h	a	h	b	h	h	a	h	h	h	h	h	b	h	a	a	h	h	a	b	a	a	h	a	h	h	a	a	b	h	h	h	h	h	h	h	h	h	h	a	a	h	b
LG5	7	7366	h	b	h	h	h	a	h	b	h	h	a	h	h	h	h	h	b	h	a	a	h	h	a	b	a	a	h	a	h	h	a	a	b	h	h	a	h	h	h	h	h	h	h	a	a	h	b
LG5	8	1224	a	b	h	h	h	a	h	b	h	h	a	h	h	h	h	h	b	h	a	a	h	h	a	b	a	a	h	a	h	h	a	a	b	h	h	a	h	h	h	h	h	h	h	a	a	h	b
LG5	9	58	a	b	h	h	h	a	h	b	h	h	a	a	b	h	h	h	b	h	a	a	h	h	a	b	a	a	h	a	h	h	a	a	b	h	h	a	h	h	h	h	h	h	h	a	a	h	b
LG5	10	7034	a	b	h	h	h	a	h	b	h	h	a	a	b	b	h	h	b	h	a	a	h	h	a	b	a	a	h	a	h	h	a	a	b	h	h	a	h	h	h	h	h	h	h	a	a	h	b
LG5	11	36628	a	b	h	h	h	a	h	b	h	h	a	a	b	b	h	h	b	h	a	a	h	h	a	b	a	a	h	h	h	h	a	a	b	h	h	a	h	h	h	h	h	h	h	a	a	h	b
LG5	12	71	a	b	h	h	h	a	h	b	h	h	a	a	b	b	h	h	b	h	a	a	h	h	a	b	a	a	h	h	h	h	a	a	b	h	h	a	b	h	h	h	h	h	h	a	a	h	b
LG5	13	6787	a	b	h	h	h	a	h	b	h	h	a	a	b	b	h	h	b	h	a	a	h	h	a	b	a	a	h	h	h	h	a	a	b	h	h	a	b	h	h	h	h	h	h	a	a	a	b
LG5	14	13059	a	b	h	h	h	a	h	b	h	h	a	a	b	b	h	h	b	h	a	h	h	h	a	b	a	a	h	h	h	h	a	a	b	h	h	a	b	h	h	h	h	h	h	a	a	a	b
LG5	15	4422	a	b	h	h	h	a	h	b	h	h	a	a	b	b	h	h	b	h	a	h	h	h	a	b	a	a	h	h	h	h	a	a	b	h	h	a	b	h	h	h	h	h	h	a	a	a	b
LG5	16	2821	a	b	h	h	h	a	h	b	h	h	a	a	b	b	h	h	b	h	a	h	h	h	a	b	a	a	h	h	h	h	a	a	b	h	h	a	b	h	h	h	h	h	h	h	a	a	b
LG5	17	3439	a	b	h	b	h	a	h	b	h	h	a	a	b	b	h	h	b	h	a	h	h	h	a	b	a	a	h	h	h	h	a	a	b	h	h	a	b	h	h	h	h	h	h	h	a	a	b
LG5	18	509	a	b	h	b	h	a	h	b	h	h	a	a	b	b	h	h	b	h	a	h	h	h	h	b	a	a	h	h	h	h	a	a	b	h	h	a	b	h	h	h	h	h	h	h	a	a	b
LG5	19	4594	a	b	a	b	h	h	h	b	h	a	a	a	b	b	h	h	b	h	a	h	h	h	h	b	a	a	h	h	h	h	a	a	b	h	h	a	b	h	h	h	h	h	h	h	a	a	b
LG5	20	6796	a	h	a	b	h	h	h	b	h	a	a	a	b	b	h	h	b	h	a	h	h	h	h	b	a	a	h	h	h	h	a	a	b	h	h	a	b	h	h	h	h	h	h	h	a	a	b
LG5	21	1550	a	h	a	b	h	h	h	b	h	a	a	a	h	b	h	h	b	h	a	h	h	h	h	b	a	a	h	h	h	h	a	a	b	h	h	a	b	h	h	h	h	h	h	h	a	a	b
LG5	22	3734	a	h	a	b	h	h	h	b	h	a	a	a	h	b	h	h	b	h	a	h	h	h	h	b	a	a	h	h	h	h	a	a	b	h	b	a	b	h	h	h	h	h	h	h	a	a	b
LG5	23	33587	a	h	a	b	h	h	h	h	h	a	a	a	h	b	h	h	b	h	a	h	h	h	h	b	a	a	h	h	h	h	a	a	h	h	b	a	b	h	h	h	h	h	h	h	a	a	b
LG5	24	5704	a	h	a	b	h	h	h	h	h	a	a	a	h	b	h	h	b	h	a	h	h	h	h	h	a	a	h	h	h	h	a	a	h	h	b	a	b	h	h	h	h	h	h	h	a	a	b
LG5	25	9803	a	h	a	b	h	h	h	h	h	a	a	a	h	b	h	h	b	h	a	h	h	h	h	h	a	a	h	h	h	h	a	a	h	h	b	a	b	h	h	a	h	h	h	h	a	a	b
LG5	26	106	a	h	a	b	h	h	h	h	h	a	a	a	h	b	h	h	b	h	a	h	h	h	h	h	a	a	h	h	h	h	a	a	h	h	b	a	b	h	h	a	h	h	h	h	a	a	b
LG5	27	22318	a	h	a	b	h	h	h	h	h	a	a	a	h	b	h	h	b	a	a	h	h	h	h	h	a	a	h	h	h	h	a	a	h	h	b	a	b	h	h	a	h	h	h	h	a	a	b
LG5	28	24663	a	a	a	b	h	h	h	h	h	a	a	a	h	b	h	h	b	a	a	h	h	h	h	h	a	a	h	h	h	h	a	a	h	h	b	a	b	h	h	a	h	h	h	h	a	a	b
LG5	29	7623	a	a	a	b	h	h	h	h	h	a	a	a	h	b	h	h	b	a	a	h	h	h	h	h	a	a	h	h	h	h	a	a	h	h	b	a	b	h	h	a	h	h	h	h	h	a	b
LG5	30	493	a	a	a	b	h	h	h	h	h	a	a	a	h	b	h	h	b	a	a	h	h	h	h	h	a	a	h	h	b	h	a	a	h	h	b	a	b	h	h	a	h	h	h	h	h	a	b
LG5	31	3196	a	a	a	b	h	h	h	h	h	a	a	a	h	b	h	h	b	a	a	h	h	h	h	h	a	a	b	h	b	h	a	a	h	h	b	a	b	h	h	a	h	h	h	h	h	a	b
LG5	32	8804	h	a	a	b	h	h	h	h	h	a	a	a	h	b	h	h	b	a	a	h	h	h	h	h	a	a	b	h	b	h	a	a	h	h	b	a	b	h	h	a	h	h	h	h	h	a	b
LG5	33	3817	h	a	a	b	h	h	h	h	h	a	a	a	h	h	h	h	b	a	a	h	h	h	h	h	a	a	b	h	b	h	a	a	h	h	b	a	b	h	h	a	h	h	h	h	h	a	b
LG5	34	18958	h	a	a	b	h	h	a	h	h	a	a	a	h	h	h	h	b	a	a	h	h	h	h	h	a	a	b	h	b	h	a	a	h	h	b	a	b	h	h	a	h	h	h	h	h	a	b
LG5	35	20319	h	a	a	b	h	b	a	h	h	a	a	a	h	h	h	h	b	a	a	h	h	h	h	h	a	a	b	h	b	h	a	a	h	h	b	a	b	h	h	a	h	h	h	h	h	a	b
LG5	36	49588	h	a	a	b	h	b	a	h	h	a	a	a	h	h	h	h	b	a	a	h	h	h	h	h	a	a	b	h	b	h	a	a	h	h	h	a	b	h	h	a	h	h	h	h	h	a	b
LG5	37	30461	h	a	a	b	h	b	a	h	h	a	a	a	h	h	h	h	b	a	a	h	h	h	h	h	a	a	b	h	b	h	a	a	h	h	h	a	h	h	h	a	h	h	h	h	h	a	b
LG5	38	4054	h	a	a	b	h	b	a	h	h	a	a	a	h	h	h	h	h	a	a	h	h	h	h	h	a	a	b	h	b	h	a	a	h	h	h	a	h	h	h	a	h	h	h	h	h	a	b
LG5	39	841	h	a	a	b	h	b	a	h	h	a	a	a	h	h	h	h	h	a	a	h	a	h	h	h	a	a	b	h	b	h	a	a	h	h	h	a	h	h	h	a	h	h	h	h	h	a	b
		total recombination events per LG	2	2	1	1	0	2	1	2	0	1	1	1	2	2	0	0	1	1	0	1	1	0	1	1	0	0	1	1	1	0	0	1	1	0	2	1	2	0	0	1	0	0	0	1	1	1	1
			10_F2	16_F2	17_F2	18_F2	20_F2	37_F2	38_F2	39_F2	40_F2	41_F2	42_F2	43_F2	44_F2	46_F2	47_F2	48_F2	49_F2	50_F2	52_F2	53_F2	54_F2	55_F2	56_F2	57_F2	58_F2	59_F2	60_F2	61_F2	62_F2	63_F2	64_F2	67_F2	68_F2	69_F2	6_F2	71_F2	72_F2	73_F2	74_F2	75_F2	76_F2	78_F2	79_F2	80_F2	81_F2	85_F2	86_F2
LG6	1	4766	b	a	h	h	h	h	b	h	b	h	b	h	h	h	h	h	h	h	b	h	h	b	h	b	a	h	b	h	h	b	a	a	b	h	b	h	b	h	h	h	b	b	a	a	a	h	b
LG6	2	23427	b	a	h	h	h	h	b	h	b	h	b	h	b	h	h	h	h	h	b	h	h	b	h	b	a	h	b	h	h	b	a	a	b	h	b	h	b	h	h	h	b	b	a	a	a	h	b
LG6	3	18562	b	a	h	h	h	h	b	h	b	h	b	h	b	h	h	h	h	h	b	h	h	b	h	b	a	h	b	h	h	b	a	a	b	h	b	h	b	h	h	h	b	h	a	a	a	h	b
LG6	4	7611	b	a	h	h	h	h	b	h	b	h	b	a	b	h	h	h	h	h	b	h	h	b	h	b	a	h	b	h	h	b	a	a	b	h	b	h	b	h	h	h	b	h	a	a	a	h	b
LG6	5	4906	b	a	h	h	h	h	b	b	b	h	b	a	b	h	h	h	h	h	b	h	h	b	h	b	a	h	b	h	h	b	a	a	b	h	b	h	b	h	h	h	b	h	a	a	a	h	b
LG6	6	2915	b	a	h	h	h	h	b	b	b	h	b	a	b	h	h	h	h	h	b	h	h	b	h	b	a	h	b	h	h	b	a	a	b	h	b	h	b	h	h	h	b	h	a	a	a	b	b
LG6	7	4567	b	a	h	h	h	h	b	b	b	h	b	a	b	h	h	h	h	h	b	h	h	h	h	b	a	h	b	h	h	b	a	a	b	h	b	h	b	h	h	h	b	h	a	a	a	b	b
LG6	8	4019	b	a	h	h	h	h	b	b	b	h	b	a	b	h	h	h	h	h	b	h	h	h	h	b	a	h	b	h	h	b	a	a	b	h	b	h	b	h	h	h	b	h	a	h	a	b	b
LG6	9	9857	b	a	h	h	h	h	b	b	b	h	b	a	b	h	h	h	h	h	b	h	a	h	h	b	a	h	b	h	h	b	a	a	b	h	b	h	b	h	h	h	b	h	a	h	a	b	b
LG6	10	7627	b	a	h	h	h	h	b	b	b	h	b	a	b	h	h	h	h	h	b	h	a	h	h	b	a	h	h	h	h	b	a	a	b	h	b	h	h	h	h	h	b	h	a	h	a	b	b
LG6	11	1889	b	a	h	h	h	h	b	b	b	h	b	a	b	h	h	h	h	h	b	h	a	h	h	b	a	h	h	h	h	b	a	a	b	h	b	h	h	h	h	h	b	h	a	h	a	b	h
LG6	12	1659	b	a	h	h	h	h	b	b	b	h	b	a	b	h	h	h	a	h	b	h	a	h	h	b	a	h	h	h	h	b	a	a	b	h	b	h	h	h	h	h	b	h	a	h	a	b	h
LG6	13	181	b	a	h	h	b	h	b	b	b	h	b	a	b	h	h	h	a	h	b	h	a	h	h	b	a	h	h	h	h	b	a	a	b	h	b	h	h	h	h	h	b	h	a	h	a	b	h
LG6	14	36955	b	a	h	h	b	h	b	b	b	h	b	a	b	h	h	h	a	h	b	h	a	h	a	b	a	h	h	h	h	b	a	a	b	h	b	h	h	h	h	h	b	h	a	h	a	b	h
LG6	15	6916	b	a	h	h	b	h	b	b	b	h	b	a	b	h	h	h	a	h	b	h	a	h	a	b	a	h	h	h	h	b	a	a	b	h	b	h	h	h	a	h	b	h	a	h	a	b	h
LG6	16	31186	b	a	h	h	b	h	b	b	b	h	b	a	b	h	h	h	a	h	b	h	a	h	a	b	a	h	h	h	a	b	a	a	b	h	b	h	h	h	a	h	b	h	a	h	a	b	h
LG6	17	7869	b	a	h	b	b	h	b	b	b	h	b	a	b	h	h	h	a	h	b	h	a	h	a	b	a	h	h	h	a	b	a	a	b	h	b	h	h	h	a	h	b	h	a	h	a	b	h
LG6	18	52127	b	a	h	b	b	h	b	b	b	h	b	a	b	h	h	h	a	h	b	h	a	h	a	b	a	h	a	h	a	b	a	a	b	h	b	h	h	h	a	h	b	h	a	h	a	b	h
LG6	19	43391	h	a	h	b	b	h	b	b	b	h	b	a	b	h	h	h	a	h	b	h	a	h	a	b	a	h	a	h	a	b	a	a	b	h	b	h	h	h	a	h	b	h	a	h	a	b	h
LG6	20	4036	h	a	h	b	b	h	b	b	b	h	b	h	b	h	h	h	a	h	b	h	a	h	a	b	a	h	a	h	a	b	a	a	b	h	b	h	h	h	a	h	b	h	a	h	a	b	h
LG6	21	9322	h	a	h	b	b	h	b	b	b	h	b	h	b	h	h	h	a	h	b	h	h	h	a	b	a	h	a	h	a	b	a	a	b	h	b	h	h	h	a	h	b	h	a	h	a	b	h
LG6	22	5574	h	a	h	b	b	h	b	b	b	h	b	h	b	h	h	h	a	h	b	h	h	h	a	b	a	h	a	h	a	b	a	h	b	h	b	h	h	h	a	h	b	h	a	h	a	b	h
LG6	23	22919	h	a	h	b	b	h	b	b	b	h	b	h	b	h	h	h	a	h	b	h	h	h	a	b	a	h	a	h	a	b	a	h	b	h	b	h	h	h	a	h	b	a	a	h	a	b	a
LG6	24	15587	h	a	h	b	b	h	b	b	b	h	b	h	b	h	h	h	a	h	b	h	h	h	a	b	a	h	a	h	a	b	a	h	b	h	b	h	h	h	a	h	h	a	a	h	a	b	a
LG6	25	3212	h	a	h	b	b	h	b	b	b	h	b	h	h	h	h	h	a	h	b	h	h	h	a	b	a	h	a	h	a	b	a	h	b	h	b	h	h	h	a	h	h	a	a	h	a	b	a
LG6	26	38849	h	a	h	b	b	h	b	b	b	h	b	h	h	h	h	h	a	h	b	h	h	h	a	b	a	b	a	h	a	b	a	h	b	h	b	h	h	h	a	h	h	a	a	h	a	b	a
LG6	27	315	h	a	h	b	b	h	b	b	b	h	b	h	h	h	h	h	a	h	b	h	h	h	h	b	a	b	a	h	a	b	a	h	b	h	b	h	h	h	a	h	h	a	a	h	a	b	a
LG6	28	2588	h	a	h	b	b	h	b	b	b	h	h	h	h	h	a	h	a	b	b	h	h	h	h	b	a	b	a	h	a	b	a	h	b	h	b	h	h	h	a	h	h	a	a	h	a	b	a
LG6	29	22245	h	a	h	b	b	h	b	b	b	h	h	h	h	h	a	h	a	b	b	h	h	h	h	b	a	b	a	h	a	b	a	h	b	h	b	h	h	h	a	b	h	a	a	h	a	b	a
LG6	30	44472	h	h	h	b	b	h	b	b	b	h	h	h	h	h	a	h	a	b	b	h	h	h	h	b	a	b	a	h	a	b	a	h	b	h	b	h	h	h	a	b	h	a	a	h	a	b	a
LG6	31	40557	h	h	h	b	b	h	b	b	b	h	h	h	h	h	a	h	a	b	b	h	h	h	h	b	a	h	a	h	a	b	a	h	b	h	b	h	h	h	a	b	h	a	a	h	a	b	a
LG6	32	13327	h	h	h	b	b	h	b	b	b	h	h	h	h	h	a	h	a	b	b	h	h	h	h	b	a	h	a	h	a	b	a	h	b	h	b	h	h	h	a	b	h	a	a	h	a	b	a
LG6	33	48585	h	h	h	b	b	h	b	b	b	h	h	h	h	h	a	h	a	b	b	h	h	h	h	b	a	h	a	h	a	b	a	h	b	h	b	h	h	h	a	b	h	a	a	h	a	b	a
LG6	34	7758	h	h	h	b	b	h	b	b	b	h	h	h	h	h	a	h	a	b	b	h	h	h	h	b	a	h	a	h	a	h	a	h	b	h	b	h	h	h	a	b	a	a	a	h	a	b	a
LG6	35	836	h	h	h	b	b	h	b	b	h	h	h	h	h	h	a	h	a	b	b	h	h	h	h	b	a	h	a	h	a	h	a	h	b	h	b	h	h	h	a	b	a	a	a	h	a	b	a
LG6	36	9366	h	h	h	b	h	h	b	b	h	h	h	h	h	h	a	h	a	b	b	h	h	h	h	b	a	h	a	h	a	h	a	h	b	h	b	h	h	h	a	b	a	a	a	h	a	b	a
LG6	37	59070	h	h	h	b	h	h	b	b	h	h	h	h	h	h	a	h	a	b	b	h	h	h	h	b	a	h	a	h	a	h	a	h	h	h	b	h	h	h	a	b	a	a	a	h	a	b	a
LG6	38	13080	h	h	h	b	h	h	b	b	h	a	h	h	h	h	a	h	a	b	b	h	h	h	h	b	a	h	a	h	a	h	a	h	h	h	b	h	h	h	a	b	a	a	a	h	a	b	a
LG6	39	1330	h	h	h	b	h	h	b	b	h	a	h	h	h	h	a	h	a	b	b	h	h	h	h	b	a	h	a	h	a	h	a	h	h	h	b	h	h	h	a	b	a	a	a	h	h	b	a
LG6	40	2839	h	h	h	b	h	h	b	b	h	a	h	h	h	h	a	h	a	b	b	h	h	h	h	b	a	h	a	h	a	h	h	h	h	h	b	h	h	h	a	b	a	a	a	h	h	b	a
LG6	41	3848	h	h	h	b	h	h	b	b	h	a	h	h	h	h	a	h	a	b	b	h	h	h	h	b	a	h	a	h	h	h	h	h	h	h	b	h	a	h	h	b	a	a	a	h	h	b	a
LG6	42	6385	h	h	h	b	h	h	b	b	h	a	h	h	h	h	a	h	a	b	b	h	h	h	h	b	a	h	a	h	h	h	h	h	h	h	b	h	a	h	h	b	a	h	a	h	h	b	a
LG6	43	36561	h	h	h	b	h	h	h	b	h	a	h	h	h	h	a	h	a	b	b	h	h	h	h	b	a	h	a	h	h	h	h	h	h	h	b	h	a	h	h	b	a	h	a	h	h	b	a
LG6	44	24437	h	h	h	b	h	h	h	b	h	a	h	h	h	h	a	h	a	b	b	h	h	h	h	b	a	h	a	h	h	h	h	h	h	h	b	h	a	h	h	b	a	h	a	h	h	b	a
LG6	45	2303	h	h	h	b	h	h	h	b	h	a	h	h	h	h	a	h	a	b	b	h	h	h	h	b	a	h	a	h	h	h	h	h	h	h	h	h	a	h	h	b	a	h	a	h	h	b	a
LG6	46	402	h	h	h	b	h	h	h	b	h	a	h	h	h	h	a	h	a	b	b	h	h	h	h	b	a	h	a	h	h	h	h	h	h	h	h	h	a	h	h	b	a	h	a	h	h	h	a
		total recombination events per LG	1	1	0	1	2	0	1	1	1	1	1	2	2	0	1	0	1	1	0	0	2	1	2	0	1	2	2	0	2	1	1	1	1	0	1	0	2	0	2	1	2	2	0	1	1	2	2
			10_F2	16_F2	17_F2	18_F2	20_F2	37_F2	38_F2	39_F2	40_F2	41_F2	42_F2	43_F2	44_F2	46_F2	47_F2	48_F2	49_F2	50_F2	52_F2	53_F2	54_F2	55_F2	56_F2	57_F2	58_F2	59_F2	60_F2	61_F2	62_F2	63_F2	64_F2	67_F2	68_F2	69_F2	6_F2	71_F2	72_F2	73_F2	74_F2	75_F2	76_F2	78_F2	79_F2	80_F2	81_F2	85_F2	86_F2
LG7	1	520	a	b	a	h	a	b	h	h	a	a	a	h	b	b	a	a	b	h	h	h	h	h	h	b	h	b	b	h	b	h	h	h	b	a	h	h	b	h	a	a	h	a	h	b	a	a	a
LG7	2	9375	a	b	a	h	a	b	h	h	a	a	a	h	b	b	a	a	b	h	h	h	h	h	h	b	h	b	b	h	b	h	h	a	b	a	h	h	b	h	a	a	h	a	h	b	a	a	a
LG7	3	1435	a	b	a	h	a	b	h	h	a	a	a	h	b	b	a	a	b	h	h	h	h	h	h	b	h	b	b	h	b	h	h	a	b	a	b	h	b	h	a	a	h	a	h	b	a	a	a
LG7	4	3575	a	b	a	h	a	b	h	h	a	a	a	h	b	b	a	a	b	h	h	h	h	h	h	b	h	b	b	h	b	h	h	a	b	a	b	h	b	h	a	a	h	a	h	b	a	a	a
LG7	5	29896	a	b	a	h	a	b	h	a	a	a	a	h	h	b	a	a	b	h	b	h	h	h	h	b	h	b	b	h	b	h	h	a	b	a	b	h	b	h	a	a	h	a	h	b	a	a	a
LG7	6	27875	a	b	a	h	a	b	h	a	a	a	a	h	h	b	a	a	b	h	b	h	h	h	h	b	h	b	b	h	b	h	a	a	b	a	b	h	b	h	a	a	a	a	h	b	a	a	a
LG7	7	45102	a	h	a	h	a	b	h	a	a	a	a	h	h	b	a	a	b	h	b	h	h	h	h	b	h	b	b	h	b	h	a	a	b	a	b	h	b	h	a	a	a	a	h	b	a	a	a
LG7	8	3052	a	h	a	h	a	b	h	a	a	a	a	h	h	b	a	h	b	h	b	h	h	h	h	b	h	b	b	h	b	h	a	a	b	a	b	h	b	h	a	a	a	a	h	b	a	a	a
LG7	9	224	a	h	a	h	a	b	h	a	a	a	a	a	h	b	a	h	b	h	b	h	h	h	h	b	h	b	b	h	b	h	a	a	b	a	b	h	b	h	a	a	a	a	h	b	a	a	a
LG7	10	95	a	h	a	h	a	b	h	a	a	a	a	a	h	b	a	h	b	h	b	h	h	h	h	b	h	b	h	h	b	h	a	a	b	a	b	h	b	h	a	a	a	a	h	b	a	a	a
LG7	11	30926	a	h	a	h	a	b	h	a	a	a	a	a	h	b	a	h	b	h	b	h	h	h	h	b	h	b	h	h	h	h	a	a	b	a	b	h	b	h	a	a	a	a	h	b	a	a	a
LG7	12	8499	a	h	a	h	a	b	h	a	a	a	a	a	h	b	a	h	b	h	b	h	h	h	h	b	h	b	h	h	h	h	a	a	b	a	b	h	b	a	a	a	a	a	h	b	a	a	a
LG7	13	2194	a	h	a	h	a	b	h	a	a	a	a	a	h	b	a	h	b	h	b	h	h	h	h	b	h	b	h	h	h	h	a	a	b	a	b	a	b	a	a	a	a	a	h	b	a	a	a
LG7	14	29944	a	h	a	h	h	b	h	a	a	a	a	a	h	b	a	h	b	h	b	h	h	h	b	b	h	b	h	h	h	h	a	a	b	a	b	a	b	a	a	a	a	a	h	b	a	a	a
LG7	15	20777	a	h	a	h	h	b	h	a	a	a	a	a	h	b	a	h	b	h	b	h	h	h	b	b	h	b	h	h	h	h	a	a	b	h	b	a	b	a	a	a	a	a	h	b	a	a	a
LG7	16	5262	a	h	a	h	h	b	h	a	h	a	a	a	h	b	a	h	b	h	b	h	h	h	b	b	h	b	h	h	h	h	a	a	b	h	b	a	b	a	a	a	a	a	h	b	a	a	a
LG7	17	3144	a	h	a	h	h	b	h	h	h	a	a	a	h	b	a	h	b	h	b	h	h	h	b	b	h	b	h	h	h	h	a	a	b	h	b	a	b	a	a	a	a	a	h	b	a	a	a
LG7	18	34915	a	h	a	h	h	b	h	h	h	a	a	a	h	b	a	h	b	h	b	h	h	h	b	b	h	b	h	h	h	h	a	a	h	h	b	a	b	a	a	a	a	a	h	b	a	a	a
LG7	19	14048	a	h	a	h	h	b	h	h	h	a	a	a	h	b	a	h	b	h	b	h	h	b	b	b	h	b	h	h	h	h	a	a	h	h	b	a	b	a	a	a	a	a	h	b	a	a	a
LG7	20	5010	a	h	a	h	h	h	h	h	h	a	a	a	h	b	a	h	b	h	b	h	h	b	b	b	h	b	h	h	h	h	a	a	h	h	b	a	b	a	a	a	a	a	h	b	a	a	a
LG7	21	26506	a	h	a	h	h	h	h	h	h	h	a	a	h	h	a	h	b	h	b	h	h	b	b	b	h	b	h	h	h	h	a	a	h	h	b	a	b	a	a	a	a	a	h	h	a	a	a
LG7	22	623	a	h	h	h	h	h	h	h	h	h	a	a	h	h	a	h	b	h	b	h	h	b	b	b	h	b	h	b	h	h	a	a	h	h	b	a	b	a	a	a	a	a	h	h	a	a	a
LG7	23	3798	a	h	h	a	h	h	h	h	h	h	a	a	h	h	a	h	b	h	b	h	h	b	b	b	h	b	h	b	h	h	a	a	h	h	b	a	b	a	a	a	a	a	h	h	a	a	a
LG7	24	3240	a	h	h	a	h	h	h	h	h	h	a	a	h	h	a	h	b	h	b	h	h	b	b	b	b	b	h	b	h	h	a	a	a	h	b	a	b	a	a	a	a	a	h	h	a	a	a
LG7	25	34338	a	h	h	a	h	h	h	h	h	h	a	a	h	h	a	h	b	h	b	h	h	b	b	b	b	b	h	b	h	h	a	a	a	h	b	a	b	a	a	a	a	a	h	h	a	a	a
LG7	26	5972	a	h	h	a	h	h	h	h	h	h	a	a	h	h	a	h	b	h	b	h	h	b	b	b	b	b	h	b	h	h	a	a	a	h	b	a	b	a	a	a	a	a	h	h	h	a	a
LG7	27	2541	a	h	h	a	h	h	h	h	h	h	a	a	h	h	a	h	b	h	b	h	h	b	b	b	b	h	h	b	h	h	a	a	a	h	b	a	b	a	a	a	a	a	h	h	h	a	a
LG7	28	12768	a	h	h	a	h	h	h	h	h	h	a	a	h	h	a	h	b	h	b	h	h	b	b	b	h	h	h	b	h	h	a	a	a	h	b	a	b	a	a	a	a	a	h	h	h	a	a
LG7	29	27614	a	h	h	a	h	h	h	h	h	h	a	a	h	a	a	h	b	h	b	h	h	b	b	b	h	h	h	b	h	h	a	a	a	h	b	a	b	a	a	a	a	a	h	h	h	a	a
LG7	30	4246	a	h	h	a	h	h	h	h	h	h	a	a	h	a	a	h	b	h	b	h	h	b	b	b	h	h	h	b	h	h	a	a	a	h	b	a	b	a	h	a	a	a	h	h	h	a	a
LG7	31	2200	a	h	h	a	h	h	h	h	h	h	a	a	h	a	a	h	b	h	h	h	h	b	b	b	h	h	h	b	h	h	a	a	a	h	b	a	b	a	h	a	a	a	h	h	h	a	a
LG7	32	3598	a	h	h	a	h	h	h	h	h	h	a	a	h	a	a	h	b	h	h	h	h	b	b	h	h	h	h	b	h	h	a	a	a	h	b	a	b	a	h	a	a	a	h	h	h	a	a
LG7	33	307	a	h	b	a	h	h	h	h	h	h	a	a	h	a	a	h	b	h	h	h	h	b	b	h	h	h	h	b	h	h	a	a	a	h	b	a	b	a	h	a	a	a	h	h	h	a	a
LG7	34	8209	a	h	b	a	h	h	h	h	h	h	a	a	h	a	a	h	b	h	h	h	h	b	b	h	h	h	h	b	h	h	a	a	a	h	h	a	b	a	h	a	a	a	h	h	h	a	a
LG7	35	54699	a	h	b	a	h	h	h	h	h	h	a	a	h	a	a	h	b	h	h	h	h	b	b	h	h	h	h	h	h	h	a	a	a	h	h	a	b	a	h	a	a	a	h	h	h	a	a
LG7	36	7845	a	h	b	a	h	h	h	h	h	h	a	a	h	a	a	h	b	h	h	h	h	b	b	h	h	h	h	h	h	h	a	a	a	h	h	a	b	a	h	a	h	a	h	h	h	a	a
LG7	37	7219	a	h	b	a	h	h	h	h	h	h	a	a	h	a	a	h	b	h	h	h	h	b	b	h	h	h	h	h	h	h	a	a	a	h	h	a	b	a	h	a	h	a	a	h	h	a	a
		total recombination events per LG	0	1	2	1	1	1	0	2	1	1	0	1	1	2	0	1	0	0	2	0	0	1	1	1	2	1	1	2	1	0	1	1	2	1	2	1	0	1	1	0	2	0	1	1	1	0	0
			10_F2	16_F2	17_F2	18_F2	20_F2	37_F2	38_F2	39_F2	40_F2	41_F2	42_F2	43_F2	44_F2	46_F2	47_F2	48_F2	49_F2	50_F2	52_F2	53_F2	54_F2	55_F2	56_F2	57_F2	58_F2	59_F2	60_F2	61_F2	62_F2	63_F2	64_F2	67_F2	68_F2	69_F2	6_F2	71_F2	72_F2	73_F2	74_F2	75_F2	76_F2	78_F2	79_F2	80_F2	81_F2	85_F2	86_F2
LG8	1	89	a	h	h	h	a	a	h	h	h	h	h	a	h	h	b	h	b	h	h	h	h	b	a	h	h	h	a	h	h	a	a	h	b	a	a	a	a	b	h	a	h	a	b	a	b	h	h
LG8	2	2961	a	h	h	h	a	a	h	h	h	h	h	a	h	h	b	h	b	b	h	h	h	b	a	h	h	h	a	h	h	a	a	h	b	a	a	a	a	b	h	a	h	a	b	a	b	h	h
LG8	3	3874	a	h	h	h	a	a	h	h	h	h	h	a	h	h	b	h	b	b	h	h	h	b	a	h	h	h	a	h	h	a	a	h	b	a	a	a	a	b	h	h	h	a	b	a	b	b	h
LG8	4	4725	a	h	h	h	a	a	h	h	h	h	h	a	h	h	b	h	b	b	h	h	h	b	a	h	h	h	a	h	h	a	a	h	b	a	a	a	a	b	h	h	h	a	b	h	b	b	h
LG8	5	369	a	h	h	h	h	a	h	h	h	h	h	a	h	h	b	h	b	b	h	h	h	b	a	h	h	h	a	h	h	a	a	h	b	a	a	a	a	b	h	h	h	a	b	h	b	b	h
LG8	6	56469	a	h	h	h	h	a	h	h	h	h	h	a	h	h	b	h	b	b	h	h	h	b	a	b	h	h	a	h	h	a	a	h	b	a	a	a	a	b	h	h	h	a	b	h	b	b	h
LG8	7	12135	a	h	h	h	h	a	b	h	h	h	h	a	h	h	b	h	b	b	h	h	h	b	a	b	h	h	a	h	h	a	a	h	b	a	a	a	a	b	h	h	h	a	b	h	b	b	h
LG8	8	458	a	h	h	h	h	a	b	h	h	h	h	a	h	h	b	h	b	b	h	h	h	b	a	b	h	h	a	h	h	a	a	h	b	h	a	a	a	b	h	h	h	a	b	h	b	b	h
LG8	9	15500	a	h	h	h	h	a	b	h	h	h	h	a	h	h	b	h	b	b	h	h	h	b	a	b	a	h	a	h	h	a	a	h	b	h	a	a	a	b	h	h	h	a	b	h	b	b	h
LG8	10	10549	a	h	h	h	h	a	b	h	h	h	h	a	h	h	b	h	b	b	h	h	h	b	a	b	a	h	a	h	h	a	a	h	b	h	a	a	a	b	h	h	h	a	b	h	b	b	a
LG8	11	603	a	h	h	h	h	a	b	h	h	h	h	a	h	h	b	h	b	b	h	h	h	b	a	b	a	h	a	h	b	a	a	h	b	h	a	a	a	b	h	h	h	a	b	h	b	b	a
LG8	12	12092	a	h	h	h	h	a	b	h	h	h	h	a	h	h	b	h	b	b	h	h	h	b	a	b	a	h	a	h	b	a	a	h	b	h	a	a	a	b	h	h	h	a	b	h	b	b	a
LG8	13	21117	a	h	h	h	h	a	b	h	h	h	h	a	h	h	b	h	b	b	h	h	h	h	a	b	a	h	a	h	b	a	a	h	b	h	a	a	a	b	h	h	h	a	b	h	b	b	a
LG8	14	30880	a	h	h	h	h	a	b	h	h	h	h	a	h	h	b	a	b	b	h	a	h	h	a	b	a	h	a	h	b	a	a	h	b	h	a	a	a	b	h	h	h	a	b	h	b	b	a
LG8	15	2769	a	h	h	h	h	a	b	h	h	h	h	a	h	h	b	a	b	b	h	a	h	h	a	b	a	h	a	h	b	a	a	h	b	h	a	a	a	b	h	h	h	a	b	h	b	b	a
LG8	16	1419	a	h	h	h	h	a	b	h	h	h	h	a	h	h	b	a	b	b	h	a	a	h	a	h	a	h	a	h	b	a	a	h	b	h	a	a	a	b	h	h	a	a	b	h	b	b	a
LG8	17	2570	a	h	h	h	h	a	b	h	h	h	h	a	h	h	b	a	b	b	h	a	a	h	a	h	a	h	a	h	h	a	a	h	b	h	a	a	a	b	h	h	a	a	b	h	b	b	a
LG8	18	3483	a	h	h	h	h	a	b	h	h	h	h	a	h	h	b	a	b	h	h	a	a	h	a	h	a	h	a	h	h	a	a	h	b	h	a	a	h	h	h	h	a	a	b	h	b	b	a
LG8	19	12668	a	h	h	h	h	a	b	h	h	h	a	a	h	h	b	a	b	h	h	a	a	h	a	h	a	h	a	h	h	a	a	h	b	h	a	a	h	h	h	h	a	a	b	h	b	b	a
LG8	20	5770	a	h	h	h	h	a	b	h	h	h	a	a	h	h	b	a	b	h	a	a	a	h	a	h	a	h	a	h	h	a	a	h	b	h	a	a	h	h	h	h	a	a	b	h	b	b	a
LG8	21	18929	a	h	h	h	h	a	b	h	h	h	a	a	h	h	b	a	b	h	a	a	a	h	a	h	a	h	a	h	h	a	a	h	b	h	a	a	h	h	b	h	a	a	b	h	b	b	a
LG8	22	5515	a	h	h	h	h	a	b	h	h	h	a	a	h	h	b	a	b	h	a	a	a	h	a	h	a	a	a	h	h	a	a	h	b	h	a	a	h	h	b	h	a	a	b	h	b	b	a
LG8	23	1845	a	h	h	h	h	a	b	h	h	h	a	a	h	h	b	a	b	h	a	a	a	h	a	h	a	a	a	h	h	a	a	h	b	h	a	a	h	h	h	h	a	a	b	h	b	b	a
LG8	24	25917	a	h	h	h	h	h	b	h	h	h	a	a	h	h	b	a	b	h	a	a	h	h	a	h	a	a	a	h	h	a	a	h	b	h	a	a	h	h	h	h	a	a	b	h	b	b	a
LG8	25	11389	a	h	h	h	h	h	b	h	h	h	a	a	h	h	b	a	b	h	a	a	h	h	a	h	a	a	a	h	h	a	a	h	b	h	a	a	h	h	h	h	a	a	b	b	b	b	a
LG8	26	9064	a	h	h	h	h	h	b	h	h	h	a	a	h	h	b	a	b	h	a	a	h	h	a	a	a	a	a	h	h	a	a	h	b	h	a	a	h	h	h	h	a	a	b	b	b	b	a
LG8	27	2302	a	h	h	h	h	h	b	h	h	h	a	a	h	h	b	a	b	h	a	a	h	h	a	a	a	a	a	h	h	h	a	h	b	h	a	a	h	h	h	h	a	a	b	b	b	b	a
LG8	28	44107	a	h	h	h	h	h	b	h	h	h	a	a	h	h	b	a	b	h	a	a	h	h	a	a	a	a	a	h	h	h	a	h	b	b	a	a	h	h	h	h	a	a	b	b	b	b	a
LG8	29	1208	a	h	h	h	h	h	b	h	h	h	a	a	h	h	b	a	b	h	a	a	h	h	a	a	a	a	a	h	h	h	a	h	b	b	a	a	h	h	h	h	a	a	b	b	b	b	a
LG8	30	19	a	h	h	h	h	h	b	h	h	h	a	a	h	a	b	a	b	h	a	a	h	h	a	a	a	a	a	h	h	h	a	h	b	b	a	a	h	h	h	h	a	a	b	b	b	b	a
LG8	31	4112	a	h	h	h	h	h	b	h	h	h	a	a	h	a	b	a	b	h	a	a	h	h	a	a	a	a	a	b	h	h	a	h	b	b	a	a	h	h	h	h	a	a	h	b	b	b	a
LG8	32	6736	a	h	h	h	h	h	b	h	h	h	a	a	h	a	b	a	b	h	a	a	h	h	a	a	a	a	a	b	h	h	a	h	b	b	a	a	h	h	h	h	a	h	h	b	b	b	a
LG8	33	39749	a	h	h	b	h	h	b	h	h	h	a	a	h	a	b	a	b	h	a	a	h	h	a	a	a	a	a	b	h	h	a	h	b	b	a	a	h	h	h	h	h	h	h	b	b	b	a
LG8	34	49273	a	h	h	h	h	h	b	h	h	h	a	a	h	a	b	a	b	h	a	a	h	h	a	a	a	a	a	b	h	h	a	h	b	b	a	a	h	h	h	h	h	h	h	b	b	b	a
LG8	35	19606	a	h	h	h	h	h	b	h	h	h	a	a	h	a	b	a	b	h	a	a	h	h	a	a	a	a	a	b	h	h	a	h	b	b	a	a	h	h	h	h	h	h	h	b	b	b	h
LG8	36	2310	a	h	h	h	h	h	b	h	h	h	a	a	h	a	b	h	b	h	a	a	h	h	a	a	a	a	a	b	h	h	a	h	b	b	a	a	h	h	h	h	h	h	h	b	b	b	h
LG8	37	3581	a	h	h	h	h	h	b	h	h	h	a	a	h	a	b	h	b	h	a	a	h	h	a	a	a	a	a	b	h	h	a	h	b	b	a	a	h	h	h	h	h	h	h	b	b	h	h
LG8	38	15995	a	h	h	h	h	h	b	h	b	h	a	a	h	a	b	h	b	h	a	a	h	h	a	a	a	a	a	b	h	h	a	h	b	b	a	a	h	h	h	h	h	h	h	b	b	h	h
LG8	39	50009	a	h	h	h	h	h	b	h	b	h	a	a	h	a	b	h	b	h	a	a	h	h	a	a	h	a	a	b	h	h	a	h	b	b	a	a	h	h	h	h	h	h	h	b	b	h	h
LG8	40	5524	a	h	h	h	h	h	h	h	b	h	a	a	h	a	b	h	b	h	a	a	h	h	a	a	h	a	a	b	h	h	a	h	b	b	a	a	h	h	h	h	h	h	h	b	b	h	h
LG8	41	17081	a	h	h	h	h	h	h	h	b	h	a	a	h	a	b	h	b	h	a	a	h	h	a	a	h	a	a	b	h	h	a	h	b	b	a	a	h	h	h	h	h	h	h	b	b	h	h
LG8	42	9390	a	h	h	h	h	h	h	h	b	h	a	a	h	a	b	h	b	h	a	a	h	h	a	a	h	a	a	b	h	h	a	h	b	b	a	a	h	h	h	h	h	h	h	b	b	a	h
LG8	43	12960	a	h	h	h	h	h	h	h	b	h	a	a	h	a	b	h	b	h	a	a	h	h	a	a	h	a	a	b	h	h	a	h	b	b	h	a	h	h	h	h	h	h	a	b	b	a	h
LG8	44	12883	a	h	h	h	h	h	h	h	b	h	a	a	h	a	h	h	b	h	a	a	h	h	a	a	h	a	a	b	h	h	a	h	b	b	h	a	h	h	h	h	h	h	a	b	b	a	h
LG8	45	3592	a	h	h	h	h	h	h	h	b	h	a	a	h	a	h	h	b	h	a	a	h	h	a	a	h	a	a	b	h	b	a	h	b	b	h	a	h	h	h	h	h	h	a	b	b	a	h
LG8	46	20945	a	h	h	h	h	h	h	h	b	h	a	a	h	a	h	h	b	h	a	a	h	h	a	a	h	a	a	b	h	b	a	h	b	h	h	a	h	h	h	h	h	h	a	b	b	a	h
LG8	47	20451	a	h	h	h	h	h	h	h	b	h	a	a	b	a	h	h	b	h	a	a	h	h	a	a	h	a	a	b	h	b	a	a	b	h	h	a	h	h	h	h	h	h	a	b	b	a	h
LG8	48	1918	a	h	h	h	h	h	h	h	b	a	a	a	b	a	h	h	b	h	a	a	h	h	a	a	h	a	a	h	h	b	a	a	b	h	h	a	h	h	h	h	h	h	a	b	b	a	h
LG8	49	3395	a	h	h	h	h	h	h	h	b	a	a	a	b	a	h	h	b	h	a	a	h	h	a	a	h	a	a	h	h	b	a	a	b	a	h	a	h	h	h	h	h	h	a	b	b	a	h
		total recombination events per LG	0	0	0	2	1	1	2	0	1	1	1	0	1	1	1	2	0	2	1	1	2	1	0	3	2	1	0	2	2	2	0	1	0	4	1	0	1	1	2	1	2	1	2	2	0	3	2
			10_F2	16_F2	17_F2	18_F2	20_F2	37_F2	38_F2	39_F2	40_F2	41_F2	42_F2	43_F2	44_F2	46_F2	47_F2	48_F2	49_F2	50_F2	52_F2	53_F2	54_F2	55_F2	56_F2	57_F2	58_F2	59_F2	60_F2	61_F2	62_F2	63_F2	64_F2	67_F2	68_F2	69_F2	6_F2	71_F2	72_F2	73_F2	74_F2	75_F2	76_F2	78_F2	79_F2	80_F2	81_F2	85_F2	86_F2
LG9	1	175	h	b	h	b	b	h	h	b	h	a	b	h	h	b	b	h	h	a	h	a	b	h	h	h	h	h	b	h	h	b	a	b	h	h	h	a	b	b	a	h	h	b	h	h	h	a	b
LG9	2	31223	h	b	h	b	b	h	b	b	h	a	b	h	h	b	b	h	h	a	h	a	b	h	h	h	h	h	b	h	h	b	a	b	h	h	h	a	b	b	a	h	h	b	h	h	h	a	b
LG9	3	2054	h	b	h	b	b	h	b	b	h	a	b	h	h	b	b	h	h	a	h	a	b	h	h	h	h	h	b	h	h	b	a	b	h	h	h	a	b	h	a	h	h	b	h	h	h	a	b
LG9	4	1976	h	b	h	b	b	h	b	b	h	a	b	h	h	b	b	h	h	a	h	a	b	h	h	h	h	h	b	h	h	b	a	b	b	h	h	a	b	h	a	h	h	b	h	h	h	a	b
LG9	5	2348	h	h	h	b	b	h	b	b	h	a	b	h	h	b	b	h	h	a	h	a	b	h	h	h	h	h	b	h	h	b	a	b	b	h	h	a	b	h	a	h	h	b	h	h	h	a	b
LG9	6	10245	h	h	h	h	b	h	b	b	h	a	b	h	h	b	b	h	h	a	h	a	b	h	h	h	h	h	b	h	h	b	a	b	b	h	h	a	b	h	a	h	h	b	h	h	h	a	b
LG9	7	40667	h	h	h	h	b	h	b	b	h	a	b	h	h	b	b	h	h	a	h	h	b	h	h	h	h	h	b	h	h	b	a	b	b	h	h	a	b	h	a	h	h	b	h	h	h	a	b
LG9	8	41041	h	h	h	h	b	h	b	h	h	a	b	h	h	b	b	h	h	a	h	h	b	h	h	h	h	h	b	h	h	b	a	b	b	h	h	a	b	h	a	h	h	b	h	h	h	a	b
LG9	9	3313	h	h	h	h	b	h	b	h	h	a	b	h	h	b	b	h	h	a	b	h	b	h	h	h	h	h	h	h	h	b	a	b	b	h	h	a	b	h	a	h	h	b	h	h	h	a	b
LG9	10	24930	h	h	h	h	b	h	b	h	h	a	b	h	h	b	b	h	h	a	b	h	b	h	h	h	h	h	h	h	a	b	a	b	b	h	h	a	b	h	a	h	h	b	h	h	h	a	b
LG9	11	594	h	h	h	h	b	h	b	h	h	a	b	h	h	b	b	h	h	a	b	h	b	h	h	h	h	h	h	h	a	h	a	b	b	h	h	a	b	h	a	h	h	b	h	h	h	a	b
LG9	12	1953	h	h	h	h	b	h	b	h	h	a	b	h	h	b	b	h	h	a	b	h	b	h	h	h	h	h	h	h	a	h	a	b	b	h	h	h	b	h	a	h	h	b	h	h	h	a	b
LG9	13	29419	h	h	h	h	b	h	b	h	h	a	b	h	h	b	b	h	h	a	b	h	b	h	h	h	h	h	h	h	a	h	a	b	b	b	h	h	b	h	a	h	h	b	h	h	h	a	b
LG9	14	25776	h	h	h	h	b	h	b	h	h	a	b	h	h	b	b	a	h	a	b	h	b	h	h	h	h	h	h	h	a	h	a	b	b	b	h	h	b	h	a	h	h	b	h	h	h	a	b
LG9	15	57037	h	h	h	h	b	h	b	h	h	a	b	h	h	b	h	a	h	a	b	h	b	h	h	h	h	h	h	h	a	h	a	b	b	b	h	h	b	h	a	h	h	b	h	h	h	a	b
LG9	16	23531	h	h	a	h	b	h	b	h	h	a	b	h	h	b	h	a	h	a	b	h	b	h	h	h	h	h	h	h	a	h	a	b	b	b	h	h	b	h	a	h	h	b	h	h	h	a	b
LG9	17	37493	h	h	a	h	b	h	b	h	h	a	b	h	h	b	h	a	h	h	b	h	b	h	h	h	h	h	h	h	a	h	a	b	b	b	h	h	b	h	a	h	h	b	h	h	h	a	b
LG9	18	8933	h	h	a	h	b	h	b	h	h	a	b	h	h	b	h	a	h	h	b	h	b	h	h	h	h	h	h	h	a	h	a	b	b	b	h	h	b	h	a	h	h	b	h	h	b	a	b
LG9	19	20435	h	a	a	h	b	h	b	h	h	a	b	h	h	b	h	a	h	h	b	h	b	h	h	h	h	h	h	h	a	h	a	h	b	b	h	h	b	h	a	h	h	b	h	a	b	a	b
LG9	20	3056	h	a	a	h	b	h	b	h	h	a	b	h	h	b	h	a	h	h	b	h	b	h	h	h	h	h	h	h	a	h	a	h	b	b	h	h	b	h	a	h	h	b	h	a	h	a	b
LG9	21	3808	h	a	a	h	b	h	b	h	h	a	b	h	h	b	h	a	h	h	b	h	b	h	h	h	h	h	h	h	a	h	a	h	b	b	h	h	b	h	a	h	h	b	b	a	h	a	b
LG9	22	11088	h	a	a	h	b	h	b	h	h	h	b	h	h	b	h	a	h	h	b	h	b	h	h	h	h	h	h	h	a	h	a	h	b	b	h	h	b	h	a	h	h	b	b	a	h	a	b
LG9	23	785	h	a	a	h	b	h	b	h	h	h	b	h	h	b	h	a	h	h	b	h	b	h	h	h	h	h	h	h	a	h	a	h	b	b	h	h	b	h	a	h	h	b	b	a	h	a	h
LG9	24	2369	h	a	a	a	b	h	b	h	h	h	b	h	h	b	h	a	h	h	b	h	b	h	h	h	h	h	h	h	a	h	a	h	b	b	h	h	b	h	a	h	h	b	b	a	h	a	h
LG9	25	3233	h	a	a	a	b	h	b	h	h	h	b	h	h	b	h	a	h	h	b	h	b	h	h	h	h	h	h	h	a	h	a	h	b	b	h	h	b	h	h	h	h	b	b	a	h	h	h
LG9	26	4605	h	a	a	a	b	h	b	h	h	h	b	h	h	b	h	a	h	h	b	b	b	h	h	h	h	h	h	h	a	h	a	h	b	b	h	h	b	h	h	h	h	b	b	a	h	h	h
LG9	27	14990	h	a	a	a	b	h	b	h	h	h	b	h	h	b	h	a	h	h	b	b	b	h	a	h	h	h	h	h	a	h	a	h	b	b	h	h	b	h	h	h	h	b	b	a	h	h	h
LG9	28	39781	h	a	a	a	b	h	b	h	h	h	b	h	h	b	h	a	h	h	b	b	b	h	a	h	h	a	h	h	a	h	a	h	b	b	h	h	b	h	h	h	h	b	b	a	h	h	h
LG9	29	9210	h	a	a	a	b	h	b	h	h	h	b	h	h	b	h	a	h	h	b	b	b	h	a	h	h	a	h	h	a	h	a	h	b	h	h	h	b	h	h	h	h	b	b	a	h	h	h
LG9	30	1921	h	a	a	a	b	h	b	h	h	h	b	h	h	b	h	a	h	h	b	b	b	h	a	h	h	a	h	h	a	h	a	h	b	h	b	h	b	h	h	h	h	b	b	a	h	h	h
LG9	31	6535	h	a	a	a	b	h	b	h	h	b	b	h	h	b	h	a	h	h	b	b	h	h	a	h	h	a	h	h	a	h	a	h	b	h	b	h	b	h	h	h	h	b	b	a	h	h	h
LG9	32	52859	h	a	a	a	b	h	b	h	h	b	b	h	h	b	h	a	h	h	b	b	h	h	a	h	h	a	h	h	a	h	a	h	b	h	b	h	b	h	h	h	h	b	b	a	h	h	a
LG9	33	2476	h	a	a	a	b	h	b	h	h	b	b	h	h	b	h	a	h	h	b	b	h	h	a	h	h	a	a	h	a	h	a	h	b	h	b	h	b	h	h	h	h	b	b	a	h	h	a
LG9	34	6378	h	a	h	a	b	h	b	h	h	b	b	h	h	b	h	a	h	h	b	b	h	h	a	h	h	a	a	h	a	h	a	h	b	h	b	h	b	h	h	h	h	b	b	a	h	h	a
LG9	35	4993	h	a	h	a	b	h	b	h	h	b	b	h	h	b	h	a	h	h	b	b	h	h	a	h	h	a	a	h	a	h	a	h	b	h	b	h	b	a	h	h	h	b	b	a	h	h	a
LG9	36	1301	h	a	h	a	b	h	b	h	h	b	b	h	h	b	h	a	a	h	b	b	h	h	a	h	h	a	a	h	a	h	a	h	b	h	b	h	b	a	h	h	h	b	b	a	h	h	a
LG9	37	27308	h	a	h	a	b	h	b	h	h	b	b	h	h	b	h	a	a	h	b	b	h	h	a	h	h	a	a	h	a	h	a	a	b	h	b	h	b	a	h	h	h	b	b	a	h	h	a
LG9	38	9078	h	a	h	a	b	h	b	h	h	b	b	h	h	b	h	a	a	h	b	b	h	h	a	h	a	a	a	h	a	h	a	a	b	h	b	h	b	a	h	h	h	b	b	a	h	h	a
LG9	39	12341	h	a	h	a	b	h	b	h	h	b	b	h	h	b	h	a	a	h	b	b	h	h	a	h	a	a	a	h	a	h	a	a	b	h	b	h	h	a	h	h	h	b	b	a	h	h	a
LG9	40	2271	h	a	h	a	b	h	b	h	h	b	b	h	h	b	h	a	a	h	b	b	h	h	a	h	a	a	a	h	a	h	a	a	b	h	b	h	h	a	h	h	h	b	b	h	h	h	a
LG9	41	13190	h	a	h	a	b	h	b	h	h	b	b	h	h	b	h	a	a	h	b	b	h	a	a	h	a	a	a	h	a	h	a	a	b	h	b	h	h	a	h	h	h	b	b	h	h	h	a
LG9	42	8899	h	a	h	a	b	h	b	h	h	b	b	h	h	b	h	a	a	h	b	b	h	a	a	h	a	a	a	h	a	a	a	a	b	h	b	h	h	a	h	h	h	b	b	h	h	h	a
LG9	43	2246	h	a	h	a	b	h	b	h	h	b	b	h	h	h	h	a	a	h	h	b	h	a	a	h	a	a	a	h	a	a	a	a	b	h	b	h	h	a	h	h	h	b	b	h	h	h	a
LG9	44	1327	h	a	h	a	b	h	b	h	h	b	b	h	h	h	h	a	a	h	h	b	h	a	a	h	a	a	a	h	a	a	a	a	b	h	b	h	h	a	h	h	h	b	h	h	h	h	a
LG9	45	8115	h	a	h	a	b	b	b	h	h	b	b	h	h	h	h	a	a	h	h	b	h	a	a	h	a	a	a	h	a	a	a	a	b	h	b	h	h	a	h	h	h	b	h	h	h	h	a
LG9	46	10723	h	a	h	a	b	b	b	h	h	b	b	h	h	h	h	a	a	h	h	b	h	a	a	h	a	a	a	h	a	a	h	a	b	h	b	h	h	a	h	h	h	b	h	h	h	h	a
LG9	47	15215	h	a	h	a	b	b	b	h	h	b	b	h	h	h	h	a	a	h	h	b	h	a	a	h	a	h	a	h	a	a	h	a	b	h	b	h	h	a	h	h	h	b	h	h	h	h	a
LG9	48	13314	h	a	h	a	b	b	b	h	h	b	b	a	h	h	h	a	a	h	h	b	h	a	a	h	a	h	a	h	a	a	h	a	b	h	b	h	h	a	h	a	h	b	h	h	h	h	a
LG9	49	49242	h	a	h	a	b	b	b	a	h	b	b	a	h	h	h	a	a	h	h	b	h	a	a	h	a	h	a	h	a	a	h	a	b	h	b	h	h	a	h	a	h	b	h	h	h	h	a
LG9	50	573	h	a	h	a	b	b	b	a	h	b	b	a	h	h	h	a	a	h	h	b	h	a	a	h	a	h	a	h	a	a	h	a	b	h	b	h	h	a	b	a	h	b	h	h	h	h	a
		total recombination events per LG	0	2	2	2	0	1	1	2	0	2	0	1	0	1	1	1	1	1	2	2	1	1	1	0	1	2	2	0	1	2	1	2	1	2	1	1	1	2	2	1	0	0	2	2	2	1	2
			10_F2	16_F2	17_F2	18_F2	20_F2	37_F2	38_F2	39_F2	40_F2	41_F2	42_F2	43_F2	44_F2	46_F2	47_F2	48_F2	49_F2	50_F2	52_F2	53_F2	54_F2	55_F2	56_F2	57_F2	58_F2	59_F2	60_F2	61_F2	62_F2	63_F2	64_F2	67_F2	68_F2	69_F2	6_F2	71_F2	72_F2	73_F2	74_F2	75_F2	76_F2	78_F2	79_F2	80_F2	81_F2	85_F2	86_F2
LG10	1	55	h	h	h	h	a	a	a	h	h	h	b	a	h	b	b	h	b	b	b	h	b	h	h	a	h	b	h	h	a	h	b	h	h	a	b	h	b	h	h	h	h	b	h	h	h	a	b
LG10	2	28	h	h	h	h	a	a	a	h	h	h	b	a	h	b	b	h	b	b	b	h	b	h	h	a	h	b	h	h	a	h	b	h	h	a	b	h	b	h	h	a	h	b	h	h	h	a	b
LG10	3	2928	h	h	h	h	a	a	a	h	h	h	b	a	h	b	b	h	b	b	b	h	b	h	h	a	h	b	h	h	a	h	b	h	h	a	b	h	b	h	b	a	h	b	h	h	h	a	b
LG10	4	56928	h	h	h	h	a	a	a	h	h	h	b	a	a	b	b	h	b	b	b	h	b	h	h	a	h	b	h	h	a	h	b	h	h	a	b	h	b	h	b	a	h	b	h	h	h	a	b
LG10	5	4025	h	h	h	h	a	a	a	h	h	h	b	a	a	b	b	h	b	b	b	h	b	h	h	a	h	b	h	h	a	h	b	h	b	a	b	h	b	h	b	a	h	b	h	h	h	a	b
LG10	6	1026	h	h	h	h	a	a	a	h	h	h	b	h	a	b	b	h	b	b	b	h	b	h	h	a	h	b	h	h	a	h	b	h	b	a	b	h	b	h	b	a	h	b	h	h	h	a	b
LG10	7	436	h	h	h	h	a	a	a	h	h	h	b	h	a	b	b	h	b	b	b	h	b	h	h	a	h	b	h	h	a	h	b	h	b	a	b	h	b	h	b	a	h	b	h	h	b	a	b
LG10	8	3517	h	h	h	h	a	a	a	h	h	h	b	h	a	b	b	h	b	b	h	h	b	h	h	a	h	b	h	h	a	h	b	h	b	a	b	h	b	h	b	a	h	b	h	h	b	a	b
LG10	9	6832	h	h	h	h	a	a	a	h	h	h	b	h	a	b	b	h	b	b	h	h	b	h	h	a	h	b	h	b	a	h	b	h	b	a	b	h	b	h	b	a	h	b	h	h	b	a	h
LG10	10	17944	h	h	h	h	a	a	a	h	h	h	b	h	a	b	b	h	b	b	h	h	b	h	h	a	h	b	h	b	a	h	b	h	b	a	b	h	h	h	b	a	h	b	h	h	b	a	h
LG10	11	19665	h	h	h	a	a	a	a	h	h	h	b	h	a	b	b	h	b	b	h	h	b	h	h	a	h	b	h	b	a	h	b	h	b	a	b	h	h	h	b	a	h	b	h	h	b	a	h
LG10	12	5929	h	h	h	a	a	a	a	h	h	h	b	h	a	b	b	h	b	b	h	h	h	h	h	a	h	b	h	b	a	h	b	h	b	a	b	h	h	h	b	a	h	b	h	h	b	a	h
LG10	13	6783	h	h	h	a	a	a	a	h	h	h	b	h	a	b	b	h	b	b	h	h	h	h	b	a	h	b	h	b	a	h	b	h	b	a	b	h	h	h	b	a	h	b	h	h	b	a	h
LG10	14	1446	h	h	h	a	a	a	a	h	h	h	b	h	a	b	b	h	b	b	h	h	h	h	b	a	h	b	h	b	a	h	b	h	b	a	b	h	h	h	b	a	h	b	h	b	b	a	h
LG10	15	20902	h	h	a	a	a	a	a	h	h	h	b	h	a	b	b	h	b	b	h	h	h	h	b	a	h	b	h	b	a	h	b	h	b	a	b	h	h	h	b	a	h	b	h	b	b	a	h
LG10	16	14879	h	h	a	a	a	a	a	b	h	h	b	h	a	b	b	h	b	b	h	h	h	h	b	a	h	b	h	b	a	h	b	h	b	a	b	h	h	h	b	a	h	b	h	b	b	a	h
LG10	17	38869	h	h	a	a	a	a	a	b	h	h	b	h	a	b	b	h	b	b	h	h	h	h	b	a	h	b	h	b	a	h	b	h	b	h	b	h	h	h	b	a	h	b	h	b	b	a	h
LG10	18	10610	h	h	a	a	a	a	a	b	h	h	b	h	a	b	b	h	b	b	h	h	h	h	b	a	h	b	h	b	a	h	b	h	b	h	b	b	h	h	b	a	h	b	h	b	b	a	h
LG10	19	34068	h	h	a	a	a	a	a	b	h	h	b	h	a	b	b	h	b	h	h	h	h	h	b	a	h	b	h	b	a	h	b	h	b	h	b	b	h	h	b	a	h	b	h	b	b	a	h
LG10	20	24206	h	h	a	a	a	a	a	b	h	h	b	h	a	b	b	h	b	h	h	h	h	h	h	a	h	b	h	b	a	b	b	h	b	h	b	b	h	h	b	a	h	b	h	b	b	a	h
LG10	21	12720	h	h	a	a	a	a	a	b	h	h	b	h	a	b	b	h	b	h	h	h	h	h	h	a	h	h	h	b	a	b	b	h	b	h	b	b	h	h	b	a	h	b	h	b	b	a	h
LG10	22	5719	h	h	a	a	a	a	a	b	h	h	b	h	a	b	b	h	b	h	h	h	h	h	h	a	h	h	h	h	a	b	b	h	b	h	b	b	h	h	b	a	h	b	h	b	b	a	h
LG10	23	6016	h	h	a	a	a	a	a	b	h	h	b	h	a	b	b	h	b	h	h	h	h	h	h	a	h	h	h	h	h	b	b	h	b	h	b	b	h	h	b	a	h	b	h	b	b	a	h
LG10	24	12097	h	h	a	a	a	a	a	b	h	h	b	h	a	b	b	h	b	h	h	h	h	h	h	a	h	h	h	h	h	b	b	h	b	h	b	b	h	h	b	a	b	b	h	b	b	a	h
LG10	25	14305	h	h	a	h	a	a	a	b	h	h	b	h	a	b	b	h	b	h	h	h	h	h	h	a	h	h	a	h	h	b	b	h	b	h	b	b	h	h	b	a	b	b	h	b	b	a	h
LG10	26	15630	h	h	a	h	a	a	a	b	h	h	b	h	a	b	b	h	b	h	h	h	h	h	h	a	h	h	a	h	h	b	b	h	b	h	b	b	h	h	b	a	b	b	h	b	b	a	h
LG10	27	57329	h	h	a	h	a	a	a	b	h	h	b	h	a	b	h	h	b	h	h	h	h	h	h	a	h	h	a	h	h	b	b	h	b	h	b	b	h	h	b	a	b	b	h	b	b	a	h
LG10	28	46138	h	h	a	h	a	a	a	b	h	h	b	h	a	b	h	h	b	h	h	b	h	h	h	a	h	h	a	h	h	b	b	h	b	h	b	b	h	h	b	a	b	b	h	b	b	a	h
LG10	29	1284	h	h	a	h	a	a	h	b	h	h	b	h	a	b	h	h	b	h	h	b	h	h	h	a	h	h	a	h	h	b	b	h	b	h	b	b	h	h	b	a	b	b	h	b	b	a	h
LG10	30	2984	h	h	a	h	a	a	h	b	h	h	b	h	a	b	h	h	b	h	a	b	h	h	h	a	h	h	a	h	h	b	b	h	b	h	b	b	h	h	b	a	b	b	h	b	b	a	h
LG10	31	12034	h	h	a	h	a	a	h	b	h	h	b	h	a	b	h	h	b	h	a	b	h	h	h	a	h	h	a	h	h	b	b	h	b	h	b	b	a	h	b	a	b	b	h	b	b	a	h
LG10	32	3480	h	h	a	h	a	a	h	b	h	h	b	h	a	b	h	h	b	h	a	b	h	h	h	h	h	h	a	h	h	b	b	h	b	h	b	b	a	h	b	a	b	b	h	b	b	a	h
LG10	33	20211	h	h	a	h	a	a	h	b	h	h	b	h	a	b	h	h	h	h	a	b	h	h	h	h	h	h	a	h	h	b	b	h	b	h	b	b	a	h	b	a	b	b	h	b	b	a	h
LG10	34	13509	h	h	a	h	a	a	h	b	h	h	b	h	a	b	h	h	h	h	a	b	h	h	h	h	h	h	a	h	h	b	b	h	b	h	b	b	a	h	b	a	b	b	b	b	b	a	h
LG10	35	36227	h	h	a	h	a	a	h	b	h	h	b	h	a	b	h	h	h	h	a	b	a	h	h	h	b	h	a	h	h	b	b	h	b	h	b	b	a	h	b	a	b	b	b	b	b	a	h
LG10	36	24959	h	h	a	h	a	a	h	b	h	h	b	h	a	b	a	h	h	h	a	b	a	h	h	h	b	h	a	h	h	b	b	h	b	h	b	b	a	h	b	a	b	b	b	b	b	a	h
LG10	37	2739	h	b	a	h	a	a	h	b	h	h	b	h	a	b	a	h	h	h	a	b	a	h	h	h	b	h	a	h	h	b	b	h	b	h	b	b	a	h	b	a	b	b	b	b	b	a	h
LG10	38	37242	h	b	a	h	a	a	h	h	h	h	b	h	a	b	a	h	h	h	a	b	a	h	h	h	b	h	a	h	h	b	b	h	b	h	b	b	a	h	b	a	b	b	b	b	b	a	h
LG10	39	717	h	b	h	h	a	a	h	h	h	h	b	h	a	b	a	h	h	h	a	b	a	h	h	h	b	h	a	h	h	b	b	h	b	h	b	b	a	h	b	a	b	b	b	b	b	a	h
LG10	40	12811	h	b	h	h	a	a	h	h	h	h	b	h	a	b	a	h	h	h	a	b	a	h	h	h	b	h	a	h	h	b	b	a	b	h	b	b	a	h	b	a	b	b	b	b	b	a	h
LG10	41	803	h	b	h	h	a	a	h	h	h	h	b	h	a	b	a	h	h	h	a	b	a	h	h	h	b	h	a	h	h	b	b	a	b	h	b	b	a	h	b	a	b	b	b	b	b	h	h
LG10	42	11783	h	b	h	h	a	a	h	h	h	h	b	h	a	b	a	h	h	h	a	b	a	h	h	h	b	h	a	h	h	b	b	a	b	h	b	h	a	h	b	a	h	b	b	b	b	h	h
LG10	43	2644	h	b	h	h	a	a	h	h	h	h	b	h	a	b	a	h	h	h	a	b	a	h	h	h	b	h	a	h	h	b	b	a	b	h	b	h	a	b	b	a	h	b	b	b	b	h	h
		total recombination events per LG	0	1	2	2	0	0	1	2	0	0	0	1	1	0	2	0	1	1	2	1	2	0	2	1	1	1	1	2	1	1	0	1	1	1	0	2	2	1	1	1	2	0	1	1	1	1	1
			10_F2	16_F2	17_F2	18_F2	20_F2	37_F2	38_F2	39_F2	40_F2	41_F2	42_F2	43_F2	44_F2	46_F2	47_F2	48_F2	49_F2	50_F2	52_F2	53_F2	54_F2	55_F2	56_F2	57_F2	58_F2	59_F2	60_F2	61_F2	62_F2	63_F2	64_F2	67_F2	68_F2	69_F2	6_F2	71_F2	72_F2	73_F2	74_F2	75_F2	76_F2	78_F2	79_F2	80_F2	81_F2	85_F2	86_F2
LG11	1	1484	b	h	h	b	b	h	a	b	b	h	h	h	h	h	h	b	h	b	a	h	b	h	h	a	b	h	a	b	h	h	b	h	a	h	b	h	h	a	h	a	b	a	b	h	a	b	a
LG11	2	551	b	h	h	b	b	h	a	b	b	h	h	h	h	h	h	h	h	b	a	h	b	h	h	a	b	h	a	b	h	h	b	h	a	h	b	h	h	a	h	a	b	a	b	h	a	b	a
LG11	3	2705	b	h	h	h	b	h	a	b	b	h	h	h	h	h	h	h	h	b	a	h	b	h	h	a	b	h	a	b	h	h	b	h	a	h	b	h	h	a	h	a	b	a	b	h	a	b	a
LG11	4	9385	b	h	h	h	b	h	a	b	b	h	h	h	h	h	h	h	h	b	a	h	b	h	h	a	b	h	a	b	h	h	b	h	a	h	b	h	h	a	h	a	b	a	b	h	a	b	a
LG11	5	5797	b	h	h	h	b	h	a	b	b	h	h	h	h	h	h	h	h	b	a	h	b	h	h	h	b	h	a	b	h	h	b	h	a	h	b	h	h	a	h	a	b	a	b	h	a	b	a
LG11	6	1579	b	h	h	h	b	h	a	b	b	h	h	h	h	h	h	h	h	b	a	h	b	h	h	h	b	a	a	b	h	h	b	h	a	h	b	h	h	a	h	a	b	a	b	h	a	b	a
LG11	7	12842	b	h	a	h	h	h	a	b	b	h	h	h	h	h	h	h	h	b	a	h	b	h	h	h	b	a	a	b	h	h	b	h	a	b	b	h	h	a	h	a	b	a	h	h	a	b	a
LG11	8	9648	b	h	a	h	h	h	a	b	b	h	h	h	h	h	h	h	h	b	a	h	b	h	h	h	b	a	a	b	h	b	b	h	a	b	b	h	h	a	h	a	b	a	h	h	a	b	a
LG11	9	19551	b	h	a	h	h	h	a	b	b	h	h	h	h	h	h	h	h	b	a	h	b	h	h	h	b	a	a	b	h	b	b	h	a	b	b	h	h	h	h	a	b	a	h	h	a	b	a
LG11	10	229	b	h	a	h	h	h	a	b	b	h	h	h	h	h	h	h	h	b	a	h	b	h	h	h	h	a	a	b	h	b	b	h	a	b	b	h	h	h	h	a	b	a	h	h	a	b	a
LG11	11	19558	b	h	a	h	h	h	h	b	b	h	h	h	h	h	h	h	h	b	a	h	b	h	h	h	h	a	a	b	h	b	b	h	a	b	b	h	h	h	h	a	b	a	h	h	a	b	a
LG11	12	36169	b	h	a	h	h	h	h	b	b	h	h	h	h	h	a	h	h	b	a	h	b	h	h	h	h	a	a	b	h	b	b	h	a	b	b	h	h	h	h	a	b	a	h	h	a	b	a
LG11	13	18128	b	h	a	h	h	h	h	b	b	h	h	h	h	h	a	h	h	b	a	h	b	h	h	h	h	a	a	b	h	b	b	h	a	b	b	b	h	h	h	a	b	a	h	h	a	b	a
LG11	14	180	b	h	a	h	h	h	h	b	b	h	h	h	h	h	a	h	h	b	a	h	b	h	h	h	h	a	a	b	h	b	h	h	a	b	b	b	h	h	h	a	b	a	h	h	a	b	a
LG11	15	18927	b	h	a	h	h	h	h	b	b	h	h	h	h	h	a	h	h	b	a	h	b	h	h	h	h	a	a	b	b	b	h	h	a	b	b	b	h	h	h	a	b	a	h	h	a	b	a
LG11	16	25023	b	h	a	h	h	h	h	b	b	h	h	h	h	a	a	h	h	b	a	h	b	h	h	h	h	a	a	b	b	b	h	h	a	b	b	b	h	h	h	a	b	a	h	h	a	b	a
LG11	17	57866	b	h	a	h	h	h	h	b	b	h	h	h	h	a	a	h	h	b	h	h	b	h	h	h	h	a	a	b	b	b	h	h	a	b	b	b	h	h	h	a	b	a	h	h	a	b	a
LG11	18	3449	b	h	a	h	h	b	h	b	b	h	h	h	h	a	a	h	h	b	h	h	b	h	h	h	h	a	a	b	b	b	h	h	a	b	b	b	h	h	h	a	b	a	h	h	a	b	a
LG11	19	2244	b	h	a	h	h	b	h	b	b	h	h	h	h	a	a	h	h	b	h	h	b	h	h	h	h	a	a	b	b	b	h	h	a	b	b	b	h	h	b	a	b	a	h	h	a	b	a
LG11	20	3788	b	h	a	h	h	b	h	b	b	h	h	h	h	a	a	h	h	b	h	h	b	h	h	h	h	a	a	b	b	b	h	h	h	b	b	b	h	h	b	a	b	a	h	h	a	b	a
LG11	21	23321	b	h	a	h	h	h	h	b	b	h	h	h	h	a	a	h	h	b	-	h	b	h	h	h	h	a	a	b	b	b	h	h	h	b	b	b	h	h	b	a	b	a	h	h	a	b	a
LG11	22	12221	b	h	a	h	h	h	h	b	b	h	h	h	h	a	a	h	h	b	h	h	b	a	h	h	h	a	a	b	b	b	h	h	h	b	b	b	h	h	b	a	b	a	h	h	a	b	a
LG11	23	45636	b	h	a	h	h	h	h	b	h	h	h	h	a	a	a	h	h	b	h	h	b	a	h	h	a	a	a	b	b	b	h	h	h	b	b	b	h	h	b	a	b	a	h	h	a	b	a
LG11	24	17198	b	h	a	h	h	h	h	b	h	h	h	h	a	a	a	h	h	b	h	h	b	a	h	h	a	a	a	b	b	b	h	h	h	b	b	b	h	b	b	a	b	a	h	h	a	b	a
LG11	25	56394	h	h	a	h	h	h	h	b	h	h	h	h	a	a	a	h	h	b	h	h	b	a	h	h	a	a	a	b	b	b	h	h	h	b	b	b	a	b	b	a	b	a	h	h	a	b	a
LG11	26	50852	h	b	a	h	h	h	h	b	h	h	h	h	a	a	a	h	h	b	h	h	b	a	h	h	a	a	a	b	b	b	h	h	h	b	b	b	a	b	b	a	b	a	h	h	a	b	a
LG11	27	2429	h	b	a	h	h	h	h	b	h	h	a	h	a	a	a	h	h	b	h	h	b	a	h	h	a	a	a	b	b	b	h	h	h	b	b	b	a	b	b	a	b	a	h	h	a	b	a
LG11	28	15831	h	b	a	h	h	h	h	b	h	h	a	h	a	a	a	h	h	b	h	h	b	a	h	h	a	a	h	b	b	b	h	h	h	b	b	b	a	b	b	a	b	a	h	h	a	b	a
LG11	29	37754	h	b	a	h	h	h	h	b	h	h	a	h	a	a	a	h	h	b	h	h	b	a	h	h	a	a	h	h	b	b	h	h	h	b	b	b	a	b	b	a	b	a	h	h	a	b	a
LG11	30	9436	h	b	a	h	h	h	h	b	h	h	a	h	a	a	a	h	h	b	h	h	b	a	b	h	a	a	h	h	b	b	h	h	h	b	b	b	a	b	b	a	b	a	h	h	a	b	a
LG11	31	10274	h	b	a	h	h	h	h	b	h	h	a	h	a	a	a	h	h	b	h	h	b	a	b	h	a	a	h	h	b	b	h	h	h	b	b	h	a	b	b	a	b	a	h	h	a	b	a
LG11	32	3059	h	b	a	h	h	h	h	b	h	h	a	h	a	a	a	h	h	b	h	h	b	a	b	h	a	a	h	h	b	b	h	h	h	b	b	h	a	b	b	a	b	a	h	a	a	b	a
LG11	33	10836	h	b	a	h	h	h	h	b	h	h	a	h	a	a	a	h	h	b	h	h	b	a	b	h	a	a	h	h	b	b	h	h	b	b	b	h	a	b	b	a	b	a	h	a	a	b	a
LG11	34	10378	h	b	a	h	h	h	h	b	h	h	a	h	a	a	a	h	h	b	h	h	b	a	b	h	a	a	h	h	b	b	h	h	b	b	b	h	a	b	b	a	b	a	h	a	h	b	a
LG11	35	2499	h	b	a	h	h	h	h	b	h	h	a	b	a	a	a	h	h	b	h	h	b	a	b	h	a	a	h	h	b	b	h	h	b	b	b	h	a	b	b	a	b	a	h	a	h	b	a
LG11	36	1415	h	b	a	h	h	h	h	b	h	h	a	b	a	a	a	h	h	b	h	h	b	a	b	h	a	a	h	h	h	b	h	h	b	b	b	h	a	b	b	a	b	a	h	a	h	b	a
		total recombination events per LG	1	1	1	1	1	2	1	0	1	0	1	1	1	1	1	1	0	0	1	0	0	1	1	1	2	1	1	1	2	1	1	0	2	1	0	2	1	2	1	0	0	0	1	1	1	0	0
			10_F2	16_F2	17_F2	18_F2	20_F2	37_F2	38_F2	39_F2	40_F2	41_F2	42_F2	43_F2	44_F2	46_F2	47_F2	48_F2	49_F2	50_F2	52_F2	53_F2	54_F2	55_F2	56_F2	57_F2	58_F2	59_F2	60_F2	61_F2	62_F2	63_F2	64_F2	67_F2	68_F2	69_F2	6_F2	71_F2	72_F2	73_F2	74_F2	75_F2	76_F2	78_F2	79_F2	80_F2	81_F2	85_F2	86_F2
LG12	1	615	h	h	h	h	b	a	h	h	h	h	h	a	b	h	h	h	a	b	h	a	b	h	b	h	a	b	b	a	h	h	h	b	b	b	h	h	a	h	h	b	h	b	h	h	h	h	a
LG12	2	234	h	h	h	h	b	a	h	h	h	h	h	a	b	h	h	h	a	b	h	a	b	h	b	b	a	b	h	a	h	h	h	b	b	b	h	h	a	h	h	b	h	b	h	h	h	h	a
LG12	3	1308	h	h	h	h	b	a	h	h	h	h	a	a	b	h	h	h	a	b	h	a	b	h	b	b	a	b	h	a	h	h	h	b	b	b	h	h	a	h	h	b	h	b	h	h	h	h	a
LG12	4	16752	h	h	h	h	b	a	h	h	h	h	a	a	b	h	h	h	a	b	h	a	b	h	b	b	a	b	h	a	h	h	h	b	b	b	h	h	a	h	h	h	h	b	h	h	h	h	a
LG12	5	707	h	b	h	h	b	a	h	h	h	h	a	a	b	h	h	h	a	b	h	a	b	h	b	b	a	b	h	a	h	h	h	b	b	b	h	h	a	h	h	h	h	b	h	h	h	h	a
LG12	6	2398	h	b	h	a	b	a	h	h	h	h	a	a	b	h	h	h	a	b	h	a	b	h	b	b	a	b	h	a	h	h	h	b	b	b	h	h	a	h	h	h	h	b	h	h	h	h	a
LG12	7	14614	h	b	h	a	b	a	h	h	h	h	a	a	b	h	h	h	a	h	h	a	b	h	b	b	a	b	h	a	h	h	h	b	b	b	h	h	a	h	h	h	h	b	h	h	h	h	a
LG12	8	3360	h	b	h	a	b	a	h	h	h	h	a	a	b	h	h	h	a	h	h	a	b	h	b	b	a	b	h	a	h	h	h	b	b	h	h	h	a	h	h	h	h	b	h	h	h	h	a
LG12	9	5431	h	b	h	a	b	a	h	h	h	h	a	a	b	h	h	h	a	h	h	a	b	h	b	b	a	b	h	a	h	h	b	b	b	h	h	h	a	h	h	h	h	b	h	h	h	h	a
LG12	10	228	h	b	h	a	b	a	h	h	h	h	a	a	b	h	h	h	a	h	h	a	b	a	b	b	a	b	h	a	h	h	b	b	b	h	h	h	a	h	h	h	h	b	h	h	h	h	a
LG12	11	869	h	b	h	a	b	a	h	h	h	h	a	a	b	h	h	h	a	h	h	a	b	a	b	b	a	h	h	a	h	h	b	b	b	h	h	h	a	h	h	h	h	b	h	h	h	h	a
LG12	12	1319	h	b	h	a	b	a	h	h	a	h	a	a	b	h	h	h	a	h	h	a	b	a	b	b	a	h	h	a	h	h	b	b	b	h	h	h	a	h	h	h	h	b	h	h	h	h	a
LG12	13	9369	h	b	h	a	b	a	h	h	a	h	a	a	b	h	h	h	a	h	h	h	b	a	b	b	a	h	h	a	h	h	b	b	b	h	h	h	a	h	h	h	h	b	h	h	h	h	a
LG12	14	7487	h	b	h	a	b	a	h	h	a	h	a	h	b	h	h	h	a	h	h	h	b	a	b	b	a	h	h	a	h	h	b	b	b	h	h	h	a	h	h	h	h	b	h	h	h	h	a
LG12	15	35832	h	b	h	a	b	a	h	h	a	h	a	h	b	h	h	h	a	h	h	h	b	a	b	b	a	h	h	h	h	h	b	b	b	h	h	h	a	a	h	h	h	b	b	h	h	h	a
LG12	16	23103	h	b	h	a	b	a	h	h	a	h	a	h	b	h	h	h	a	h	h	h	h	a	b	b	a	h	h	h	h	h	b	h	b	h	h	h	a	a	h	h	h	b	b	h	h	h	a
LG12	17	19966	a	b	h	a	b	a	h	h	a	h	a	h	b	h	h	h	a	h	h	h	h	a	b	b	a	h	h	h	h	h	b	h	b	h	h	h	a	a	h	h	h	b	b	h	h	h	a
LG12	18	29898	a	b	h	a	b	a	h	h	a	h	a	h	b	h	h	h	a	h	h	h	h	a	b	h	a	h	h	h	h	h	b	h	b	h	h	h	a	a	h	h	h	b	b	h	h	h	a
LG12	19	18239	a	b	h	a	b	a	h	h	a	h	a	h	b	h	h	h	a	h	h	h	h	a	b	h	a	h	h	h	h	h	b	h	b	h	h	h	a	a	h	h	h	b	b	b	h	h	a
LG12	20	34750	a	b	h	a	b	a	h	h	a	h	a	h	b	h	h	h	a	h	h	h	h	a	b	h	a	h	h	h	h	h	b	h	b	h	h	h	a	a	h	h	h	b	b	b	h	h	a
LG12	21	30452	a	b	h	a	b	h	h	h	a	b	a	h	b	h	h	h	a	h	h	h	h	a	b	h	a	h	a	h	h	h	b	h	b	h	h	h	a	a	h	h	h	b	b	b	h	h	a
LG12	22	16508	a	b	h	a	b	h	h	h	a	b	a	h	b	h	h	h	a	h	h	h	h	a	b	h	a	h	a	h	h	h	b	h	b	h	h	h	a	a	h	h	h	b	b	h	h	h	a
LG12	23	1326	a	b	h	a	b	h	h	h	a	b	a	h	b	h	h	h	a	h	h	h	h	a	b	h	a	h	a	h	h	h	b	h	b	h	h	h	a	a	h	h	h	b	b	h	h	a	a
LG12	24	32636	a	b	h	a	b	h	h	h	a	b	a	h	b	h	h	h	a	h	h	h	h	a	b	h	a	h	a	h	h	h	b	h	b	a	h	h	a	a	h	h	h	b	h	h	h	a	a
LG12	25	1115	a	b	h	a	b	h	h	h	a	b	a	h	b	h	h	h	a	h	h	h	h	a	b	h	a	h	a	h	h	h	b	h	b	a	h	h	a	a	h	h	h	b	h	h	h	h	a
LG12	26	30435	a	b	h	a	h	h	h	h	a	b	a	h	b	h	h	h	a	h	h	h	h	a	b	h	a	h	a	h	h	h	b	h	b	a	h	h	a	h	h	h	h	b	h	h	h	h	a
LG12	27	9094	a	b	h	a	h	h	h	h	a	b	a	h	b	h	h	h	a	h	h	h	a	a	b	h	a	h	a	h	a	h	b	h	b	a	h	h	a	h	h	h	h	b	h	h	h	h	a
LG12	28	6058	a	b	h	a	h	h	h	h	a	b	a	b	b	h	h	h	a	h	h	h	a	a	b	h	a	h	a	h	a	h	b	h	b	a	h	h	a	h	h	h	h	b	h	h	h	h	a
LG12	29	10600	a	b	h	a	h	h	h	h	a	b	a	b	b	h	h	h	a	h	h	h	a	a	b	h	a	h	a	h	a	h	b	h	b	a	h	h	a	h	h	h	a	b	h	h	h	h	a
LG12	30	24831	a	b	h	a	h	h	h	h	a	b	a	b	b	h	h	h	a	h	h	h	a	a	b	h	a	h	a	h	a	h	b	h	b	a	h	h	h	h	h	h	a	b	h	h	h	h	a
LG12	31	42767	a	b	h	a	h	h	h	h	a	b	a	b	b	h	h	h	a	h	h	h	a	a	b	h	a	h	a	h	a	h	b	h	b	a	h	h	h	h	h	h	a	b	h	h	b	h	a
LG12	32	8510	a	b	h	a	h	h	h	a	a	b	a	b	b	h	h	h	a	h	h	h	a	a	b	h	a	h	a	h	a	h	b	h	b	a	h	h	h	h	h	h	a	b	h	h	b	h	a
LG12	33	54210	a	b	h	a	h	h	h	a	a	b	a	b	b	h	h	h	a	h	h	h	a	a	b	h	a	h	a	h	a	h	b	h	h	a	h	h	h	h	h	h	a	b	h	h	b	h	a
LG12	34	23340	a	b	h	a	h	h	h	a	a	b	a	b	b	h	h	h	a	h	h	h	a	a	b	h	a	h	a	h	a	h	b	h	h	a	h	h	h	h	h	h	a	b	h	h	b	h	h
LG12	35	16445	a	b	h	a	h	h	h	a	a	b	a	b	h	h	h	a	a	h	h	h	a	a	b	h	a	h	a	h	a	h	b	h	h	a	h	h	h	h	h	h	a	b	h	h	b	h	h
LG12	36	1230	a	b	h	a	h	h	h	a	a	b	a	b	h	h	h	a	a	h	h	h	a	a	b	h	a	h	a	h	a	h	b	h	h	a	h	h	b	h	h	h	a	b	h	h	b	h	h
LG12	37	18887	a	b	h	a	h	h	h	a	a	b	a	b	h	h	h	a	a	h	h	h	a	a	b	h	a	h	a	h	a	h	b	h	h	a	h	h	b	h	h	h	a	h	h	h	b	h	h
LG12	38	44569	a	b	h	a	h	h	h	a	a	b	a	b	h	h	h	a	a	h	h	h	a	a	b	h	a	h	a	h	a	h	b	h	h	a	b	h	b	h	h	h	a	h	h	h	b	h	h
LG12	39	10816	a	b	h	a	h	h	h	a	h	b	a	b	h	h	h	a	a	h	h	h	a	a	b	h	a	h	a	h	a	h	b	h	h	a	b	h	b	h	h	h	a	h	h	h	b	h	h
LG12	40	17064	a	b	h	a	h	h	h	a	h	b	a	b	h	h	a	a	a	h	h	h	a	a	b	h	a	h	a	h	a	h	b	h	h	a	b	h	b	h	h	h	a	h	h	h	b	h	h
LG12	41	126	a	b	h	a	h	h	h	a	h	b	a	b	h	h	a	a	a	h	h	h	a	a	b	h	a	h	a	h	a	h	b	h	h	a	b	h	b	h	h	a	a	h	h	h	b	h	h
LG12	42	40570	a	b	b	a	h	h	h	a	h	b	a	b	h	h	a	a	a	h	h	h	a	a	b	h	a	h	a	b	a	h	b	h	h	a	b	h	b	h	h	a	a	h	h	h	b	h	h
LG12	43	6697	a	b	b	a	h	h	a	a	h	b	a	b	h	h	a	a	a	h	h	h	a	a	b	h	a	h	a	b	a	h	b	h	h	a	b	h	b	h	h	a	a	h	h	h	h	h	h
LG12	44	18457	a	h	b	a	h	h	a	a	h	b	a	b	h	h	a	a	a	h	a	h	a	h	b	h	a	h	a	b	a	h	b	h	h	a	b	h	b	h	h	a	a	h	h	h	h	h	h
LG12	45	2619	a	h	b	a	h	h	a	a	h	b	a	b	h	h	a	a	a	h	a	b	a	h	b	h	a	h	a	b	a	h	b	h	h	a	b	h	b	h	b	a	a	h	h	h	h	h	h
		total recombination events per LG	1	2	1	1	1	1	1	1	2	1	1	2	1	0	1	1	0	1	1	2	2	2	0	2	0	1	2	2	1	0	1	1	1	2	1	0	2	2	1	2	1	1	2	2	2	2	1
			10_F2	16_F2	17_F2	18_F2	20_F2	37_F2	38_F2	39_F2	40_F2	41_F2	42_F2	43_F2	44_F2	46_F2	47_F2	48_F2	49_F2	50_F2	52_F2	53_F2	54_F2	55_F2	56_F2	57_F2	58_F2	59_F2	60_F2	61_F2	62_F2	63_F2	64_F2	67_F2	68_F2	69_F2	6_F2	71_F2	72_F2	73_F2	74_F2	75_F2	76_F2	78_F2	79_F2	80_F2	81_F2	85_F2	86_F2
LG13	1	1094	h	b	h	h	h	h	h	a	h	b	h	b	h	b	b	h	h	h	a	a	a	h	h	b	h	h	h	h	b	h	h	h	a	h	b	b	b	h	h	h	b	h	b	h	h	h	b
LG13	2	2703	h	b	h	h	h	h	h	a	h	b	h	b	h	b	b	h	h	h	a	a	a	h	h	b	h	h	h	h	b	a	h	h	a	h	b	b	b	h	h	h	b	h	b	h	h	h	b
LG13	3	9544	h	b	h	h	h	h	a	a	h	b	h	b	h	b	b	h	h	h	a	a	a	h	h	b	h	h	h	h	b	a	h	h	a	h	b	b	b	h	h	h	b	h	b	h	h	h	b
LG13	4	5410	h	b	h	h	h	h	a	a	h	b	h	b	h	b	b	h	h	h	a	h	a	h	h	b	h	h	h	h	b	a	h	h	a	h	b	b	b	h	h	h	b	h	b	h	h	h	b
LG13	5	2919	h	b	h	h	b	h	a	a	h	b	h	h	h	b	b	h	h	h	a	h	a	h	h	b	h	h	h	h	b	a	h	h	a	h	b	b	b	h	h	h	b	h	b	h	h	h	b
LG13	6	58442	h	b	h	h	b	h	a	a	h	b	h	h	h	b	b	h	h	h	a	h	a	h	h	b	h	h	h	h	b	a	h	h	a	h	b	b	b	h	h	h	b	h	h	h	h	h	b
LG13	7	4336	h	b	h	h	b	h	a	a	h	b	h	h	a	b	b	h	h	h	a	h	a	h	h	b	h	h	h	h	b	a	h	h	a	h	b	b	b	h	h	h	b	h	h	h	h	h	b
LG13	8	2876	h	b	h	h	b	h	a	a	h	b	h	h	a	b	b	h	h	h	a	h	a	h	h	b	h	h	h	h	b	a	h	h	a	h	b	b	b	h	h	h	b	h	h	h	h	h	b
LG13	9	9665	h	b	h	h	b	h	a	a	h	b	h	h	a	b	b	h	h	h	a	h	a	h	h	b	h	a	h	h	b	a	h	h	a	h	b	b	b	h	h	h	b	h	h	h	h	h	b
LG13	10	4952	h	b	h	h	b	h	a	a	h	b	h	h	a	b	b	h	h	h	a	h	a	h	h	b	h	a	h	h	b	a	h	h	a	h	b	b	b	h	h	h	b	h	h	a	h	h	b
LG13	11	13430	h	b	h	h	b	h	a	a	h	b	h	h	a	b	b	h	h	h	a	h	a	h	h	b	h	a	h	h	b	a	h	h	a	h	b	b	b	h	h	h	b	h	h	a	h	h	b
LG13	12	55345	h	b	h	h	b	h	a	a	h	b	h	h	a	b	b	h	h	h	a	h	a	h	h	b	h	a	h	h	b	a	h	h	a	h	b	b	b	h	h	h	b	h	h	a	h	h	h
LG13	13	9052	h	b	h	h	b	h	a	a	h	b	h	h	a	b	b	h	h	h	a	h	a	h	h	b	h	a	h	h	b	a	h	h	a	h	b	b	b	h	a	h	b	h	h	a	h	h	h
LG13	14	6144	h	b	h	h	b	h	a	a	h	b	h	h	a	b	b	h	a	h	a	h	a	h	h	b	h	a	h	h	b	a	h	a	a	h	b	b	b	h	a	h	b	h	h	a	h	h	h
LG13	15	8082	h	b	h	h	b	h	a	a	h	b	h	h	a	b	b	h	a	h	a	h	h	h	h	b	h	a	h	h	b	a	h	a	a	h	b	b	b	h	a	h	b	h	h	a	h	h	h
LG13	16	45175	h	b	h	h	b	h	a	a	h	b	h	h	a	b	b	h	a	h	a	h	h	h	h	b	h	a	h	h	b	a	h	a	a	h	b	b	b	h	a	h	b	h	h	a	h	h	h
LG13	17	19458	h	b	h	h	b	h	a	a	h	b	h	h	a	b	b	h	a	h	a	h	h	h	h	b	h	a	h	h	b	a	h	a	a	a	b	b	b	h	a	h	b	h	h	a	h	h	h
LG13	18	9999	h	b	h	h	b	h	a	a	h	b	h	h	a	b	h	h	a	h	a	h	h	h	h	b	h	a	h	h	b	a	h	a	a	a	b	b	b	h	a	h	b	h	h	a	h	h	h
LG13	19	5603	h	b	h	h	b	h	a	h	h	b	h	h	a	b	h	h	a	h	a	h	h	h	h	b	h	a	h	h	b	a	h	a	a	a	b	b	b	h	a	h	b	h	h	a	h	h	h
LG13	20	45939	h	b	h	h	b	h	a	h	h	b	h	h	a	b	h	h	a	h	a	h	h	h	h	b	h	a	h	h	b	a	h	a	a	a	h	b	b	h	a	h	b	h	h	a	h	h	h
LG13	21	3932	h	b	h	h	b	b	a	h	h	b	h	h	a	b	h	h	a	h	a	h	h	h	h	b	h	a	h	h	b	a	h	a	a	a	h	b	h	h	a	h	b	h	h	a	h	h	h
LG13	22	1750	h	b	h	h	b	h	a	h	h	b	h	h	a	b	h	h	a	h	a	h	h	h	h	b	h	a	h	h	b	a	h	a	a	a	h	b	h	h	a	h	b	h	h	a	h	h	h
LG13	23	22713	h	b	h	h	b	h	a	h	h	b	h	h	a	b	h	h	a	h	a	h	h	h	h	b	h	a	h	b	b	a	h	a	a	a	h	b	h	h	a	h	b	h	h	a	h	h	h
LG13	24	19500	h	b	h	h	b	h	a	h	h	b	h	h	a	b	h	h	a	h	a	h	h	h	h	b	h	a	h	b	b	a	h	a	a	a	h	b	h	h	a	h	h	h	h	a	h	h	h
LG13	25	44703	h	b	h	a	b	h	a	h	h	b	h	h	a	b	h	h	a	h	a	h	h	h	h	b	h	a	h	b	b	a	h	a	a	a	h	b	h	h	a	h	h	h	h	a	h	h	h
LG13	26	27293	h	b	h	a	b	h	a	h	h	b	h	h	a	b	h	a	a	h	a	h	h	h	h	b	h	a	h	b	b	a	h	a	a	a	h	b	h	h	a	h	h	h	h	a	h	h	h
LG13	27	4987	h	b	h	a	b	h	a	h	h	b	h	h	a	b	h	a	a	h	a	h	h	h	h	b	h	a	a	b	b	a	h	a	a	a	h	b	h	h	a	h	h	h	h	a	h	h	h
LG13	28	7802	h	b	h	a	b	h	a	h	b	b	h	h	a	b	h	a	a	h	a	h	h	h	h	b	h	a	a	b	b	a	h	a	a	a	h	b	h	h	a	h	h	h	h	a	h	h	h
LG13	29	12406	h	b	h	a	b	h	a	h	b	b	h	h	a	b	h	a	a	h	a	h	h	h	h	b	h	a	a	b	b	a	h	a	a	a	h	b	h	h	a	b	h	h	h	a	h	h	h
LG13	30	7388	h	b	h	a	b	h	a	h	b	b	h	h	a	h	h	a	a	h	a	h	h	h	h	b	h	a	a	b	b	a	b	a	a	a	h	b	h	h	a	b	h	h	h	a	h	h	h
LG13	31	36212	h	b	h	a	b	h	a	h	b	b	h	h	a	h	h	a	a	h	a	h	h	h	h	b	h	a	a	b	b	a	b	a	a	a	h	b	h	b	a	b	h	h	h	a	h	h	h
LG13	32	20108	h	b	h	a	b	h	a	h	b	b	h	h	a	h	h	a	a	h	a	h	h	h	h	b	h	a	a	h	b	a	b	a	a	a	h	b	h	b	a	b	h	h	h	a	h	h	h
LG13	33	25250	h	b	h	a	b	h	a	h	b	b	h	h	a	h	h	a	h	h	a	h	h	h	h	b	h	a	a	h	b	a	b	a	a	a	h	b	h	b	a	b	h	h	h	a	h	h	h
LG13	34	3781	h	b	h	a	b	h	a	h	b	b	h	h	a	h	h	a	h	h	a	h	h	h	h	b	h	a	a	h	b	a	b	a	a	a	a	b	h	b	a	b	h	h	h	a	h	h	h
LG13	35	3088	h	b	h	a	b	h	a	h	b	b	h	h	a	h	h	a	h	h	a	h	h	h	h	b	h	a	a	h	b	a	h	a	a	a	a	b	h	b	a	b	h	h	h	a	h	h	h
LG13	36	470	h	b	h	a	b	h	a	h	b	b	h	h	a	h	h	a	h	h	a	h	h	h	h	h	h	a	a	h	b	a	h	a	a	a	a	b	h	b	a	b	h	h	h	a	h	h	h
LG13	37	15779	h	b	h	a	b	h	a	h	b	b	h	h	a	h	h	a	h	h	a	h	h	h	h	h	h	a	a	h	b	a	h	a	a	a	a	b	h	h	a	b	h	h	h	a	h	h	h
LG13	38	6563	h	b	h	a	b	h	a	h	b	b	h	h	a	h	h	a	h	h	a	h	h	h	h	h	h	a	a	h	b	a	h	a	a	a	a	b	h	h	a	b	h	h	a	a	b	h	h
LG13	39	32917	h	b	h	a	b	h	a	h	b	b	h	h	a	h	h	a	h	h	a	h	h	h	h	h	h	a	a	h	b	a	h	a	a	h	a	b	h	h	a	b	h	h	a	a	b	h	h
LG13	40	23808	h	b	h	a	b	h	a	h	b	b	h	h	a	h	h	a	h	h	a	h	h	h	h	h	h	a	a	h	b	a	h	a	a	h	a	b	h	h	a	b	h	h	a	a	b	b	h
LG13	41	5275	h	h	h	a	b	h	a	h	b	b	h	h	a	h	h	a	h	h	a	h	h	h	h	h	h	a	a	h	b	a	h	a	a	h	a	b	h	h	a	b	h	h	a	a	b	b	h
LG13	42	1674	h	h	h	a	b	h	a	b	b	b	h	h	a	h	h	a	h	h	a	h	h	h	h	h	h	a	a	h	b	a	h	a	a	h	a	b	h	h	a	b	h	h	a	a	b	b	h
		total recombination events per LG	0	1	0	1	1	2	1	2	1	0	0	1	1	1	1	1	2	0	0	1	1	0	0	1	0	1	1	2	0	1	2	1	0	2	2	0	1	2	1	1	1	0	2	1	1	1	1
			10_F2	16_F2	17_F2	18_F2	20_F2	37_F2	38_F2	39_F2	40_F2	41_F2	42_F2	43_F2	44_F2	46_F2	47_F2	48_F2	49_F2	50_F2	52_F2	53_F2	54_F2	55_F2	56_F2	57_F2	58_F2	59_F2	60_F2	61_F2	62_F2	63_F2	64_F2	67_F2	68_F2	69_F2	6_F2	71_F2	72_F2	73_F2	74_F2	75_F2	76_F2	78_F2	79_F2	80_F2	81_F2	85_F2	86_F2
LG14	1	417	b	b	a	h	a	h	b	h	h	h	h	b	b	a	a	h	h	b	h	h	h	b	a	a	b	h	h	h	h	b	a	h	h	a	a	h	h	h	b	a	h	h	a	h	h	h	h
LG14	2	25480	b	b	a	h	a	h	b	h	h	h	h	b	b	a	a	h	h	b	h	h	h	b	a	a	b	h	h	h	h	b	a	h	h	a	a	h	h	h	b	a	h	h	a	h	h	h	a
LG14	3	49483	b	b	a	h	a	h	b	h	h	h	h	b	b	a	a	h	h	b	h	h	h	b	a	a	b	a	h	h	h	b	a	h	h	a	a	h	h	h	b	a	h	h	a	h	h	h	a
LG14	4	8807	b	b	a	h	a	h	b	h	h	h	h	b	b	a	a	h	h	b	h	h	h	b	a	a	b	a	h	h	h	b	a	h	h	a	a	h	h	h	b	a	h	h	a	h	h	b	a
LG14	5	6486	b	b	a	h	a	h	b	h	h	b	h	b	b	a	a	h	h	b	h	h	h	b	a	a	b	a	h	h	h	b	a	h	h	a	a	h	h	h	b	a	h	h	a	h	h	b	a
LG14	6	10086	b	b	a	h	a	h	b	h	h	b	h	b	b	a	a	h	h	b	h	b	h	b	a	a	b	a	h	h	h	b	a	h	h	a	a	h	h	h	b	a	h	h	a	h	h	b	a
LG14	7	5718	b	b	a	h	a	h	b	h	h	b	h	b	b	a	a	h	h	b	h	b	h	b	a	a	b	a	h	h	h	b	a	h	h	a	a	h	a	h	b	a	h	h	a	h	h	b	a
LG14	8	9266	b	b	a	h	a	h	b	h	h	b	h	b	b	a	a	h	h	b	h	b	h	b	a	a	b	a	h	h	h	b	a	h	h	h	a	h	a	h	b	a	h	h	a	h	h	b	a
LG14	9	26921	b	b	a	h	a	h	b	h	h	b	h	b	b	a	a	h	h	b	h	b	h	b	a	a	b	a	h	h	h	b	a	h	b	h	a	h	a	h	b	a	h	h	a	h	h	b	a
LG14	10	7449	b	b	a	h	a	h	b	h	h	b	h	b	b	a	a	h	h	b	h	b	h	b	a	a	b	a	h	h	h	b	a	h	b	h	a	h	a	h	b	a	h	h	a	h	a	b	a
LG14	11	35290	b	b	a	h	a	h	b	h	h	b	h	b	b	h	a	h	h	b	h	b	h	b	a	a	b	a	h	h	h	b	a	h	b	h	a	h	a	h	b	a	h	h	a	h	a	b	a
LG14	12	4337	b	b	a	b	a	h	b	h	h	b	h	b	b	h	a	h	a	b	h	b	h	b	a	a	b	a	h	h	h	b	a	h	b	h	a	h	a	h	b	a	h	h	a	h	a	b	a
LG14	13	49205	b	b	a	b	a	h	b	h	h	b	h	b	b	h	a	h	a	b	h	b	h	b	a	a	b	a	h	h	h	b	a	h	b	h	a	h	a	h	b	a	h	h	a	h	a	h	a
LG14	14	8452	b	h	a	b	a	h	b	h	h	b	h	b	b	h	a	h	a	b	h	b	h	b	a	a	b	a	h	h	h	b	a	h	b	h	a	h	a	h	b	a	h	h	a	h	a	h	a
LG14	15	5062	b	h	a	b	a	h	b	h	h	b	h	b	b	h	a	h	a	b	h	b	h	b	a	a	b	a	h	h	h	b	a	h	b	h	a	h	a	h	b	a	h	h	a	h	a	h	h
LG14	16	1050	b	h	a	b	a	h	b	h	h	b	h	b	b	h	h	h	a	b	h	b	h	b	a	a	b	a	h	h	h	b	a	h	b	h	a	h	a	h	b	a	h	h	a	h	a	h	h
LG14	17	3026	b	h	a	b	a	h	b	h	h	b	a	b	b	h	h	h	a	b	h	b	h	b	a	a	b	a	h	h	h	b	a	h	b	h	a	h	a	h	b	a	h	h	a	h	a	h	h
LG14	18	32857	b	h	a	b	a	h	b	h	h	b	a	b	b	h	h	h	h	b	h	b	h	b	a	a	b	a	h	h	h	b	a	h	b	h	a	h	a	h	b	a	h	h	a	h	a	h	h
LG14	19	3369	b	h	a	b	a	h	b	h	h	b	a	b	b	h	h	h	h	b	h	b	h	b	a	a	h	a	h	a	h	b	a	h	b	h	a	h	a	h	b	a	h	h	a	h	a	h	h
LG14	20	5810	h	h	a	b	a	h	b	h	h	b	a	b	b	h	h	h	h	b	h	b	h	b	h	a	h	a	h	a	h	b	a	h	b	h	a	h	a	h	b	a	h	h	a	h	a	h	h
LG14	21	8970	h	h	a	b	h	h	b	h	h	b	a	b	b	h	h	h	h	b	h	b	h	b	h	a	h	a	b	a	h	b	a	h	b	h	a	h	a	h	b	a	h	h	a	h	a	h	h
LG14	22	7418	h	h	a	b	h	h	b	h	h	b	a	b	b	h	h	h	h	b	h	b	h	b	h	a	h	a	h	a	h	b	a	h	b	h	a	h	a	h	b	a	h	h	a	h	a	h	h
LG14	23	24237	h	h	a	b	h	h	b	h	h	b	a	h	b	h	h	h	h	b	h	b	h	b	h	a	h	a	h	a	h	b	a	h	b	h	a	h	a	h	b	a	h	h	a	h	a	h	h
LG14	24	14860	h	h	a	b	h	h	b	h	h	b	a	h	b	h	h	h	h	b	h	b	h	b	h	a	h	a	h	a	h	b	h	h	b	h	a	h	a	h	b	a	h	h	a	h	a	h	h
LG14	25	4264	h	h	a	b	h	h	b	h	h	b	a	h	b	h	h	h	h	b	h	b	h	b	h	a	h	a	h	a	h	b	h	h	b	h	a	h	a	h	b	a	h	h	a	h	h	h	h
LG14	26	2729	h	h	a	b	h	h	b	h	h	b	a	h	b	h	h	h	h	b	h	b	h	b	h	a	h	a	h	a	h	h	h	h	b	h	a	h	a	h	b	a	h	h	a	h	h	h	h
LG14	27	918	h	h	a	b	h	h	b	h	h	b	a	h	h	h	h	h	h	b	h	b	h	b	h	a	h	a	h	a	h	h	h	h	b	h	a	h	a	h	b	a	h	h	a	h	h	h	h
LG14	28	602	h	h	a	b	h	h	b	h	h	b	h	h	h	b	h	h	h	b	h	b	h	b	h	a	h	a	h	a	h	h	h	h	b	h	a	h	a	h	b	a	h	h	a	h	h	h	h
LG14	29	1085	h	h	a	b	h	h	b	h	h	b	h	h	h	b	h	h	h	b	h	b	h	b	h	a	h	a	h	a	h	h	h	h	b	h	a	h	a	h	b	a	h	h	h	h	h	h	h
LG14	30	3030	h	h	a	b	h	h	b	h	h	b	h	h	h	b	h	h	h	b	h	b	h	b	h	a	a	a	h	a	h	h	h	h	b	h	a	h	a	h	b	a	h	a	h	h	h	h	h
LG14	31	39661	h	h	a	b	h	h	b	h	h	b	h	h	a	b	h	h	h	b	h	b	h	b	h	a	a	a	h	a	h	h	h	h	b	h	a	h	a	h	b	a	h	a	h	h	h	h	h
LG14	32	2352	h	h	a	b	h	h	b	h	h	b	h	h	a	b	h	h	h	b	h	b	h	b	h	a	a	a	h	a	h	h	h	h	b	h	h	h	a	b	b	a	h	a	h	h	h	h	h
LG14	33	1758	h	h	a	b	h	h	h	h	h	b	h	h	a	b	h	h	h	b	h	b	h	b	h	a	a	a	h	a	h	h	h	h	b	h	h	h	a	b	b	a	h	a	h	h	h	h	h
LG14	34	4273	h	h	a	b	b	h	h	h	h	b	h	h	a	b	b	h	h	b	h	b	h	b	h	a	a	a	h	a	h	h	h	h	b	h	h	h	a	b	b	a	h	a	h	h	h	h	h
LG14	35	41618	h	h	a	b	b	h	h	h	h	b	h	h	a	b	b	h	h	b	h	b	h	b	h	a	a	a	h	h	h	h	h	h	b	h	h	h	a	b	b	a	h	a	h	h	h	h	h
LG14	36	15064	h	h	a	b	b	h	h	h	h	b	h	h	a	b	b	h	h	b	h	b	h	h	h	a	a	a	h	h	h	h	h	h	b	h	h	h	a	b	b	a	h	a	h	h	h	h	h
LG14	37	26826	h	h	a	b	b	h	h	h	h	b	h	h	a	b	b	h	h	b	h	b	h	h	h	a	a	a	h	h	h	h	h	h	b	h	h	h	a	b	b	a	h	a	h	h	h	h	b
LG14	38	1402	h	h	a	b	b	h	h	h	h	b	h	h	a	b	b	h	h	b	h	b	h	h	h	h	a	a	h	h	h	h	h	h	b	h	h	h	a	b	b	a	h	a	h	h	h	h	b
LG14	39	17	h	h	a	b	b	h	h	h	h	b	h	h	a	b	b	h	h	b	h	b	h	h	h	h	a	a	h	h	h	h	h	h	b	h	h	h	a	b	b	a	h	a	h	b	h	h	b
LG14	40	749	h	h	h	b	b	h	h	h	h	b	h	h	a	b	b	h	h	b	h	b	h	h	h	h	a	a	h	h	h	h	h	h	b	h	h	h	a	b	b	a	h	a	h	b	h	h	b
LG14	41	6284	h	h	h	b	b	h	h	h	h	b	h	h	a	b	b	h	h	b	h	h	h	h	h	h	a	a	h	h	h	h	h	h	b	h	h	h	a	b	b	a	h	a	h	b	h	h	b
		total recombination events per LG	1	1	1	1	2	0	1	0	0	1	2	1	2	2	2	0	2	0	0	2	0	1	1	1	2	1	2	2	0	1	1	0	1	1	1	0	1	1	0	0	0	1	1	1	2	2	3
			10_F2	16_F2	17_F2	18_F2	20_F2	37_F2	38_F2	39_F2	40_F2	41_F2	42_F2	43_F2	44_F2	46_F2	47_F2	48_F2	49_F2	50_F2	52_F2	53_F2	54_F2	55_F2	56_F2	57_F2	58_F2	59_F2	60_F2	61_F2	62_F2	63_F2	64_F2	67_F2	68_F2	69_F2	6_F2	71_F2	72_F2	73_F2	74_F2	75_F2	76_F2	78_F2	79_F2	80_F2	81_F2	85_F2	86_F2
LG15	1	1090	h	b	b	h	h	h	h	h	h	b	a	h	a	h	b	h	h	h	h	h	h	a	a	h	a	a	b	a	h	h	a	b	a	b	a	h	h	h	h	h	b	b	h	b	h	h	a
LG15	2	17488	h	b	h	h	h	h	h	h	h	b	a	h	a	h	b	h	h	h	h	h	h	a	a	h	a	a	b	a	h	h	a	b	a	b	a	h	h	h	h	h	b	b	h	b	h	h	a
LG15	3	1028	h	b	h	h	h	h	h	h	h	b	a	h	a	h	b	h	h	h	b	h	h	a	a	h	a	a	b	a	h	h	a	b	a	b	a	h	h	h	h	h	b	b	h	b	h	h	a
LG15	4	18637	h	b	h	h	h	h	h	h	h	b	a	h	a	h	b	h	h	h	b	h	h	a	a	h	a	a	b	a	h	h	a	b	h	b	a	h	h	h	h	h	b	b	h	b	h	h	a
LG15	5	4528	h	b	h	h	h	h	h	h	h	b	a	h	a	h	b	h	h	h	b	h	h	a	h	h	a	a	b	a	h	h	a	b	h	b	a	h	h	a	h	h	b	b	h	b	h	h	a
LG15	6	1597	h	b	h	h	h	h	h	h	h	b	a	h	a	h	b	h	h	h	b	b	h	a	h	h	a	a	b	a	h	h	a	b	h	b	a	h	h	a	h	h	b	b	h	b	h	h	a
LG15	7	37219	h	b	h	h	h	h	h	h	h	b	a	h	a	h	b	h	h	h	b	b	h	a	h	h	a	a	b	a	h	h	a	b	h	b	a	h	h	a	h	h	h	b	h	b	h	h	a
LG15	8	10497	h	b	h	h	h	h	h	h	h	b	a	h	h	h	b	h	h	h	b	b	h	a	h	h	a	a	b	a	h	h	a	b	h	b	a	h	h	a	h	h	h	b	h	b	h	h	a
LG15	9	6163	h	b	h	h	h	h	h	h	h	b	a	h	h	h	b	h	h	h	b	b	h	a	h	h	a	a	h	a	h	h	a	b	h	b	a	h	h	a	h	h	h	b	h	h	h	h	a
LG15	10	31041	h	b	h	h	h	h	h	h	h	b	a	h	h	h	h	h	h	h	b	b	h	a	h	h	a	a	h	a	h	h	a	b	h	b	a	h	h	a	h	h	h	b	h	h	h	h	a
LG15	11	1909	h	b	h	h	h	h	h	h	h	b	a	h	h	h	h	h	h	h	b	b	h	a	h	h	a	a	h	a	h	h	a	b	h	b	a	h	h	a	h	h	h	b	h	h	a	h	a
LG15	12	1934	h	b	h	h	h	h	h	h	h	b	a	h	h	h	h	h	h	h	b	b	h	a	h	b	a	a	h	a	h	h	a	b	h	b	a	h	h	a	h	h	h	b	h	h	a	h	a
LG15	13	53760	h	b	h	h	h	h	h	h	h	b	a	h	h	h	h	h	h	h	b	b	h	a	h	b	a	a	h	a	h	h	a	b	h	b	a	h	a	a	h	h	h	h	h	h	a	h	a
LG15	14	3826	a	b	h	h	h	h	h	h	h	b	a	h	h	h	h	h	h	h	b	b	h	a	h	b	a	a	h	a	h	h	a	b	h	b	a	h	a	a	h	h	h	h	h	h	a	h	a
LG15	15	2224	a	b	h	h	h	h	h	h	h	b	a	h	h	h	h	h	h	h	b	b	h	a	h	b	a	a	h	a	h	h	a	b	h	b	a	h	a	a	h	b	h	h	h	h	a	h	a
LG15	16	17743	a	b	h	h	h	h	h	h	h	b	a	h	h	h	h	h	h	h	b	b	h	a	h	b	a	a	h	a	h	h	h	b	h	b	a	h	a	a	h	b	h	h	h	h	a	h	a
LG15	17	8657	a	b	h	h	b	h	h	h	h	b	a	h	h	h	h	h	h	h	b	b	h	a	h	b	a	a	h	a	h	h	h	b	h	b	a	h	a	a	h	b	h	h	h	h	a	h	a
LG15	18	3641	a	b	h	h	b	h	h	h	h	b	a	h	h	h	h	h	h	h	b	b	h	a	h	b	a	a	h	a	h	b	h	b	h	b	a	h	a	a	h	b	h	h	h	h	a	h	a
LG15	19	3245	a	b	h	h	b	h	h	h	h	b	a	h	h	h	h	a	h	a	b	b	h	a	h	b	a	a	h	a	h	b	h	b	h	b	a	a	a	a	h	b	h	h	h	h	a	h	a
LG15	20	15901	a	b	h	h	b	h	h	h	h	b	a	h	h	h	h	a	h	a	b	b	h	h	h	b	a	a	h	a	h	b	h	b	h	b	a	a	a	a	h	b	h	h	h	h	a	h	a
LG15	21	2810	a	b	h	h	b	h	h	h	h	b	a	h	h	h	h	a	h	a	b	b	h	h	h	b	a	a	h	a	a	b	h	b	h	b	a	a	a	a	h	b	h	h	h	h	a	h	a
LG15	22	9924	a	b	h	h	h	h	h	h	h	b	a	h	h	h	h	a	h	a	b	b	h	h	h	b	a	a	h	a	a	b	h	b	h	b	a	a	a	a	h	b	h	h	h	h	a	h	a
LG15	23	18964	a	b	a	h	h	h	h	h	h	b	a	h	h	h	h	a	h	a	b	b	h	h	h	b	a	a	h	a	a	b	h	b	h	b	a	a	a	a	h	b	h	h	h	h	a	h	a
LG15	24	5884	a	b	a	h	h	h	h	h	h	b	a	h	h	h	h	a	h	a	b	h	h	h	h	b	a	a	h	a	a	b	h	b	h	b	a	a	a	a	h	b	h	h	h	h	a	h	a
LG15	25	1950	a	b	a	h	h	h	h	h	h	b	a	h	h	h	h	a	h	a	b	h	h	h	h	b	a	a	h	a	a	b	h	h	h	b	a	a	a	a	h	b	h	h	h	h	a	h	a
LG15	26	12953	a	b	a	h	h	h	h	h	h	b	a	h	h	h	h	a	h	a	b	h	h	h	h	b	a	a	h	a	a	b	h	h	h	b	a	a	a	a	h	b	h	h	h	h	a	h	a
LG15	27	12930	a	b	a	h	h	h	h	h	h	b	a	h	h	h	h	a	h	a	b	h	h	h	h	b	a	a	h	a	a	b	h	h	h	b	a	a	a	a	h	b	h	h	h	h	a	h	h
LG15	28	59222	a	b	a	h	h	h	h	h	h	b	a	h	h	h	h	a	h	a	b	h	h	h	h	b	a	h	h	a	a	b	h	h	h	b	a	a	a	a	h	b	h	h	a	h	a	h	h
LG15	29	35733	a	b	a	h	h	b	h	h	h	b	a	h	h	h	h	a	h	a	b	h	h	h	h	b	a	h	h	a	h	b	h	h	h	b	a	a	a	a	h	b	b	h	a	h	a	h	h
LG15	30	52547	a	b	a	h	h	b	h	h	h	b	a	h	h	h	h	a	h	a	b	h	h	h	h	b	a	h	h	a	h	b	h	h	h	b	a	a	a	a	b	b	b	h	a	h	a	h	h
LG15	31	5225	a	b	a	h	h	b	h	h	h	b	a	h	h	a	h	a	h	a	b	h	h	h	h	b	a	h	h	a	h	b	h	h	h	b	a	a	a	a	b	b	b	h	a	h	a	h	h
LG15	32	1789	a	b	a	h	h	b	h	h	h	b	a	h	h	a	h	a	h	a	b	h	h	h	h	b	a	h	h	a	h	b	h	h	h	b	a	a	a	a	b	b	b	h	a	h	a	h	h
LG15	33	3754	a	b	a	h	h	b	h	h	h	b	a	h	h	a	h	a	h	h	b	h	h	h	h	b	a	h	h	a	h	b	h	h	h	b	a	a	a	a	b	b	b	h	a	h	a	h	h
LG15	34	7534	a	b	a	h	h	b	h	h	h	b	a	a	b	a	h	a	h	h	b	h	h	h	h	b	a	h	h	a	h	b	h	h	h	b	a	a	a	a	b	b	b	h	a	h	a	h	h
LG15	35	29036	a	b	a	h	h	b	h	h	h	b	a	a	b	a	h	a	h	h	b	h	h	h	h	b	a	h	h	a	h	b	h	h	h	b	a	a	a	a	b	b	b	h	a	a	a	h	h
LG15	36	6411	a	b	a	h	h	b	h	h	h	b	a	a	b	a	h	a	h	h	b	h	h	h	h	b	a	h	h	a	h	b	h	h	h	b	h	a	a	a	b	b	b	h	a	a	a	h	h
		total recombination events per LG	1	0	2	0	2	1	0	0	0	0	0	1	2	1	1	1	0	2	1	2	0	1	1	1	0	1	1	0	2	1	1	1	1	0	1	1	1	1	1	1	2	1	1	2	1	0	1
			10_F2	16_F2	17_F2	18_F2	20_F2	37_F2	38_F2	39_F2	40_F2	41_F2	42_F2	43_F2	44_F2	46_F2	47_F2	48_F2	49_F2	50_F2	52_F2	53_F2	54_F2	55_F2	56_F2	57_F2	58_F2	59_F2	60_F2	61_F2	62_F2	63_F2	64_F2	67_F2	68_F2	69_F2	6_F2	71_F2	72_F2	73_F2	74_F2	75_F2	76_F2	78_F2	79_F2	80_F2	81_F2	85_F2	86_F2
LG16	1	2076	a	h	h	a	h	b	h	b	h	h	a	h	h	b	b	a	h	h	a	h	h	h	h	b	h	b	h	b	h	h	h	h	h	a	a	h	h	h	h	h	h	h	a	h	b	b	b
LG16	2	9775	a	h	h	a	h	b	h	b	h	h	a	h	h	b	b	a	a	h	a	h	h	h	h	b	h	b	h	b	h	h	h	h	h	a	a	h	h	h	h	h	h	h	a	h	b	b	b
LG16	3	39504	a	h	h	a	h	b	h	b	h	h	a	h	h	b	b	a	a	h	a	h	h	h	h	b	h	b	h	b	h	h	h	h	h	a	a	h	h	h	h	h	h	h	a	h	b	b	h
LG16	4	38447	a	h	h	h	h	b	h	b	h	h	a	h	h	b	b	a	a	h	a	h	h	h	h	b	h	b	h	b	h	h	h	h	h	a	a	h	h	h	h	h	h	h	a	h	b	b	h
LG16	5	7229	a	h	h	h	b	b	h	b	h	h	a	h	h	b	b	a	a	h	a	h	h	h	h	b	h	b	h	b	h	h	h	h	h	a	a	h	h	h	h	h	h	h	a	h	b	b	h
LG16	6	149	a	h	b	h	b	b	h	b	h	h	a	h	h	b	b	a	a	h	a	h	h	h	h	b	h	b	h	b	h	h	h	h	h	a	a	h	h	h	h	h	h	h	a	h	b	b	h
LG16	7	11372	a	h	b	h	b	b	h	b	h	h	a	h	h	b	b	a	a	h	a	h	h	h	h	b	h	b	h	b	h	h	h	h	h	a	a	h	a	h	h	h	h	h	a	h	b	b	h
LG16	8	48208	a	b	b	h	b	b	h	b	h	h	a	h	h	b	b	a	a	h	a	h	h	h	h	b	h	b	h	b	h	h	h	h	h	a	a	h	h	h	h	h	h	h	a	h	b	b	h
LG16	9	1832	a	b	b	h	b	b	h	b	b	h	a	h	h	b	b	a	a	h	a	h	h	a	h	b	h	b	h	b	h	h	h	h	h	a	a	h	h	h	h	h	h	h	a	h	b	h	h
LG16	10	15403	a	b	b	h	b	b	h	b	b	h	a	h	h	b	b	a	a	h	a	h	h	a	h	b	h	b	h	b	h	h	h	h	h	h	a	h	h	h	h	h	h	h	a	h	b	h	h
LG16	11	17236	a	b	b	h	b	b	h	b	b	h	a	h	h	b	b	a	a	a	a	b	h	a	h	b	h	b	h	b	h	h	h	h	h	h	a	h	h	h	h	h	b	h	a	h	b	h	h
LG16	12	2824	a	b	b	h	b	b	h	b	b	h	a	h	h	b	b	a	a	a	a	b	h	a	h	b	h	b	b	b	h	h	h	h	h	h	a	h	h	h	h	h	b	h	a	h	b	h	h
LG16	13	24320	a	b	b	h	b	b	h	b	b	h	a	b	h	b	b	a	a	a	a	b	h	a	h	b	h	b	b	b	h	h	h	h	h	h	a	h	h	h	h	h	b	h	a	h	b	h	h
LG16	14	900	a	b	b	h	b	b	h	b	b	h	a	b	h	b	b	a	a	a	a	b	h	a	h	b	h	b	b	b	h	h	h	h	h	h	a	h	h	b	h	h	b	h	a	h	b	h	h
LG16	15	8839	a	b	b	h	b	b	h	b	b	h	a	b	h	b	b	a	a	a	a	b	h	a	h	h	h	b	b	b	h	h	h	h	h	h	a	h	h	b	h	h	b	h	a	h	b	h	h
LG16	16	6807	a	b	b	h	b	b	h	b	b	h	a	b	h	b	b	a	a	a	a	b	h	a	b	h	h	b	b	b	h	h	h	h	h	h	a	h	h	b	h	h	b	h	a	h	b	h	h
LG16	17	14272	a	b	b	h	b	b	h	b	b	h	a	b	h	b	b	a	a	a	a	b	h	a	b	h	h	b	b	b	h	h	a	h	a	h	a	h	h	b	h	h	b	h	a	h	b	h	h
LG16	18	34405	a	b	b	h	h	b	h	b	b	h	a	b	h	b	b	a	a	a	a	b	h	a	b	h	h	b	b	b	h	h	a	h	a	h	a	h	h	b	h	h	b	h	a	h	b	h	h
LG16	19	495	a	b	b	h	h	b	h	b	b	h	a	b	h	b	b	a	a	a	a	b	a	a	b	h	h	b	b	b	h	h	a	h	a	h	a	h	h	b	h	h	b	h	a	h	b	h	h
LG16	20	4677	a	b	b	h	h	b	h	h	b	h	a	b	h	b	b	a	a	a	a	b	a	a	b	h	h	b	b	b	h	h	a	h	a	h	a	h	h	b	h	h	b	h	a	h	b	h	h
LG16	21	1709	a	b	b	h	h	b	h	h	b	h	a	b	h	b	b	a	a	a	a	b	a	a	b	h	h	b	b	b	b	h	a	h	a	h	a	h	h	b	h	h	b	h	a	h	b	h	h
LG16	22	33165	a	b	b	h	h	b	h	h	b	h	a	b	h	b	b	a	h	a	a	b	a	a	b	h	h	b	b	b	b	h	a	h	a	h	a	h	h	b	h	h	b	h	a	h	b	h	h
LG16	23	6638	a	b	b	h	h	b	h	h	b	h	a	b	h	b	b	a	h	a	a	b	a	a	b	h	h	b	b	b	b	h	a	h	a	h	a	h	h	b	h	h	b	h	h	h	b	h	h
LG16	24	6942	a	b	b	h	h	b	h	h	b	h	a	b	h	b	b	a	h	a	h	b	a	a	b	h	h	b	b	b	b	h	a	b	a	h	a	h	h	b	h	h	b	h	h	h	b	h	h
LG16	25	4612	a	b	b	h	h	b	h	h	b	h	a	b	h	b	b	a	h	a	h	b	a	a	b	h	h	b	b	b	b	h	a	h	a	h	a	h	h	b	h	h	b	h	h	h	b	h	h
LG16	26	1866	h	b	b	h	h	b	h	h	b	h	a	b	h	b	b	a	h	a	h	b	a	a	b	h	h	b	b	b	b	h	a	h	a	h	a	h	h	b	h	h	b	h	h	h	b	h	h
LG16	27	49320	h	b	b	h	h	b	h	h	b	h	a	b	h	h	b	a	h	a	h	b	a	a	b	h	h	b	b	b	b	h	a	h	a	h	a	h	h	b	h	h	b	h	b	h	b	h	h
LG16	28	4327	h	b	b	h	h	b	h	h	h	h	a	b	h	h	b	a	h	a	h	b	a	a	b	h	h	b	b	b	b	h	a	h	a	h	a	h	h	b	h	h	b	h	b	h	b	h	h
LG16	29	1821	h	b	b	h	h	b	h	h	h	h	a	b	b	h	b	a	h	a	h	b	a	a	b	h	h	b	b	b	b	h	a	h	a	h	a	h	h	b	h	h	b	h	b	h	b	h	h
LG16	30	5726	h	b	b	h	h	b	h	h	h	h	a	b	b	h	b	a	h	a	h	b	a	a	b	h	h	b	b	b	b	b	a	h	a	h	a	h	h	b	h	h	b	h	b	h	b	h	h
LG16	31	3220	h	b	b	h	h	b	h	h	h	h	a	b	b	h	b	a	h	a	h	b	a	a	b	h	h	b	h	b	b	b	a	h	a	h	a	h	h	b	h	h	b	h	b	h	b	h	h
LG16	32	3383	h	b	b	h	h	h	h	h	h	h	a	b	b	h	b	a	h	a	h	b	a	a	b	h	h	b	h	b	b	b	a	h	a	h	a	h	h	b	h	h	b	h	b	h	b	h	h
LG16	33	11496	h	b	b	h	h	h	h	h	h	h	a	b	b	h	b	a	h	a	h	b	a	a	b	h	h	b	h	b	b	b	a	h	a	h	a	h	h	h	h	h	b	h	b	h	b	h	h
LG16	34	525	h	b	b	h	h	h	h	h	h	h	a	b	b	h	b	a	h	a	h	b	a	a	b	h	h	b	h	h	b	b	a	h	a	h	a	h	h	h	h	h	b	h	b	h	b	h	h
LG16	35	43196	h	b	b	h	h	h	h	h	h	h	a	b	b	h	b	a	h	a	h	b	a	h	b	h	h	b	h	h	b	b	a	h	a	h	a	h	h	h	h	h	b	h	b	h	b	h	h
LG16	36	41813	h	b	b	h	h	h	h	h	h	h	a	b	b	h	b	a	h	a	h	b	a	h	b	h	b	b	h	h	b	b	a	h	a	h	a	h	h	h	h	h	b	h	b	h	b	h	h
LG16	37	18676	h	b	b	h	h	h	h	h	h	h	a	b	b	a	b	a	h	a	h	b	a	h	b	h	b	b	h	h	b	b	a	h	a	h	a	h	h	h	h	h	b	h	b	h	b	h	h
LG16	38	2060	h	b	b	h	h	h	h	h	h	h	a	b	b	a	b	a	h	a	h	h	a	h	b	h	b	b	h	h	b	b	a	h	a	h	a	h	h	h	h	h	b	h	b	h	b	h	h
LG16	39	1716	h	b	b	h	h	h	h	h	h	h	a	b	b	a	b	a	h	a	h	h	a	h	b	h	b	b	h	h	b	b	a	h	a	h	a	h	h	h	h	h	b	h	b	a	b	h	h
LG16	40	18247	h	b	b	h	h	h	h	h	h	h	a	b	b	a	b	a	h	a	h	h	a	h	b	h	b	b	h	h	b	b	a	h	a	h	a	h	h	h	h	h	h	h	b	a	b	h	h
LG16	41	1470	h	b	b	h	h	h	h	a	h	h	a	b	b	a	b	a	h	a	h	h	a	h	b	h	b	b	h	h	b	b	a	h	a	h	a	h	h	h	h	h	h	h	b	a	b	h	h
LG16	42	9465	h	b	b	h	b	h	h	a	h	h	a	b	b	a	b	a	h	a	h	h	a	h	b	h	b	b	h	h	b	b	a	h	a	h	a	h	h	h	h	h	h	h	b	a	b	h	h
LG16	43	3658	h	b	b	h	b	h	h	a	h	h	a	b	b	a	b	a	h	a	h	h	a	h	b	h	b	b	h	h	b	b	a	h	a	h	a	h	h	h	h	h	h	h	b	a	b	h	h
		total recombination events per LG	1	1	1	1	3	1	0	2	2	0	0	1	1	2	0	0	2	1	1	2	1	2	1	1	1	0	2	1	1	1	1	2	1	1	0	0	2	2	0	0	2	0	2	1	0	1	1
			10_F2	16_F2	17_F2	18_F2	20_F2	37_F2	38_F2	39_F2	40_F2	41_F2	42_F2	43_F2	44_F2	46_F2	47_F2	48_F2	49_F2	50_F2	52_F2	53_F2	54_F2	55_F2	56_F2	57_F2	58_F2	59_F2	60_F2	61_F2	62_F2	63_F2	64_F2	67_F2	68_F2	69_F2	6_F2	71_F2	72_F2	73_F2	74_F2	75_F2	76_F2	78_F2	79_F2	80_F2	81_F2	85_F2	86_F2
LG17	1	1225	h	b	h	h	h	a	a	h	a	a	h	b	h	b	b	a	b	b	b	b	b	h	b	h	h	h	h	b	h	h	a	h	h	h	a	a	h	b	h	b	a	b	b	h	a	b	h
LG17	2	7343	h	b	h	h	h	a	a	h	a	a	h	b	h	b	b	a	b	b	b	b	b	h	b	h	h	h	h	b	h	h	a	h	h	h	a	a	h	b	b	b	a	b	b	h	a	b	h
LG17	3	1688	h	b	h	h	h	a	a	h	a	a	h	b	h	b	b	a	b	b	b	b	b	h	b	h	h	h	h	b	h	h	a	a	h	h	a	a	h	b	b	b	a	b	b	h	a	b	h
LG17	4	3348	h	b	h	h	h	a	a	h	a	a	h	b	h	b	b	a	b	b	b	b	b	h	b	h	a	h	h	b	h	h	a	a	h	h	a	a	h	b	b	b	a	b	b	h	a	b	h
LG17	5	16743	h	b	h	h	h	a	a	h	a	a	h	b	h	b	b	a	b	b	b	b	b	h	b	h	a	h	h	b	h	h	a	a	h	h	a	a	h	b	b	b	a	b	b	h	h	b	h
LG17	6	15749	h	b	h	h	h	a	a	h	a	a	h	b	h	b	b	a	b	b	b	b	b	h	b	h	a	h	h	b	h	h	a	a	h	h	a	a	h	b	b	h	a	b	b	h	h	b	h
LG17	7	9712	h	b	h	h	h	a	a	h	a	a	h	b	h	b	b	a	b	b	b	b	h	h	b	h	a	h	h	b	h	h	a	a	h	h	a	h	h	b	b	h	a	b	b	h	h	b	h
LG17	8	825	h	b	h	h	h	a	a	h	a	a	h	b	h	b	b	a	b	b	b	b	h	h	b	h	a	a	h	b	h	h	a	a	h	h	a	h	h	b	b	h	a	b	b	h	h	b	h
LG17	9	4377	h	b	h	h	h	h	a	h	a	a	h	b	h	b	b	a	b	b	b	b	h	h	b	h	a	a	h	b	h	h	a	a	h	h	a	h	h	b	b	h	a	b	b	h	h	b	h
LG17	10	9685	h	b	a	h	h	h	a	h	a	a	h	b	h	b	b	a	b	b	b	b	h	h	b	h	a	a	h	b	h	h	a	a	h	h	a	h	h	b	b	h	a	b	b	h	h	b	h
LG17	11	9161	h	b	a	h	h	h	a	h	a	a	h	b	h	b	b	h	b	b	b	b	h	h	b	h	a	a	h	b	h	h	a	a	h	h	a	h	h	b	b	h	a	b	b	h	h	b	h
LG17	12	13901	h	b	a	h	h	h	a	h	a	a	h	b	h	b	b	h	b	b	b	h	h	h	b	h	a	a	h	b	h	h	a	a	h	h	a	h	h	b	b	h	a	b	b	h	h	b	h
LG17	13	464	h	b	a	h	h	h	a	h	h	a	h	b	h	b	b	h	b	b	b	h	h	h	b	h	a	a	h	b	h	h	a	a	h	h	a	h	h	b	b	h	a	b	b	h	h	b	h
LG17	14	8031	h	b	a	h	h	h	a	h	h	a	h	b	h	b	h	h	b	b	b	h	h	h	b	h	a	a	h	b	h	h	a	a	h	h	a	h	h	b	b	h	a	b	b	h	h	b	h
LG17	15	2557	h	b	a	h	h	h	a	h	h	a	h	b	h	b	h	h	b	b	b	h	h	h	b	h	a	a	h	b	h	h	a	a	h	h	a	h	h	b	b	h	a	b	h	h	h	b	h
LG17	16	1475	h	b	a	h	h	h	a	h	h	a	h	b	h	b	h	h	b	b	b	h	h	h	b	h	a	a	h	h	h	h	a	a	h	h	a	h	h	b	b	h	a	b	h	h	h	b	h
LG17	17	10927	h	b	a	h	h	h	a	h	h	a	h	b	h	b	h	h	b	b	b	h	h	h	b	h	a	a	a	h	h	h	a	a	h	h	a	h	h	b	b	h	a	b	h	h	h	b	h
LG17	18	21514	h	b	a	h	h	h	a	h	h	a	h	b	h	b	h	h	b	b	b	h	h	h	b	h	a	a	a	h	h	h	a	a	h	h	a	h	h	b	b	h	h	b	h	h	h	b	h
LG17	19	1571	h	b	a	h	h	h	a	b	h	a	h	b	h	b	h	h	b	b	b	h	h	h	b	h	a	a	a	h	h	h	a	a	h	h	a	h	h	b	b	a	h	b	h	h	h	b	h
LG17	20	1324	h	b	a	h	h	h	a	b	h	a	h	b	h	b	h	h	b	b	b	h	h	h	b	h	a	a	a	a	h	h	a	a	h	h	a	h	h	b	b	a	h	b	h	h	h	b	b
LG17	21	37238	h	b	a	h	h	h	a	b	h	a	h	b	h	b	h	h	b	b	b	h	h	h	b	h	a	a	a	a	h	h	a	a	h	h	a	h	h	b	b	a	h	b	h	h	h	h	b
LG17	22	9439	h	b	h	h	h	h	a	b	h	a	h	b	h	b	h	h	b	b	b	h	h	h	b	h	a	a	a	a	h	h	a	a	h	h	a	h	h	b	b	a	h	b	h	h	h	h	b
LG17	23	3611	h	b	h	h	h	h	a	b	h	a	h	b	h	b	h	h	b	b	b	h	h	h	b	h	a	a	a	a	h	h	a	a	h	h	a	h	h	b	b	a	h	b	h	a	h	h	b
LG17	24	17822	h	b	h	h	h	h	a	b	h	a	h	b	h	b	h	h	b	b	b	h	h	h	b	h	a	a	a	a	h	h	a	a	h	h	a	h	h	b	b	a	h	b	h	a	h	h	b
LG17	25	936	h	b	h	h	h	h	a	b	h	h	h	b	h	b	h	h	b	b	b	h	h	h	b	h	a	a	a	a	h	h	a	a	h	h	a	h	h	b	b	a	h	b	h	a	h	h	b
LG17	26	9651	h	b	h	h	h	h	h	b	h	h	h	b	h	b	h	h	b	b	b	h	h	h	b	h	a	a	a	a	h	h	a	a	h	h	a	h	h	b	b	a	h	b	h	a	h	h	b
LG17	27	11412	h	b	h	h	h	h	h	b	h	h	h	b	a	b	h	h	b	b	b	h	h	h	b	h	a	a	a	a	h	h	a	a	h	h	a	h	h	b	b	a	h	b	h	a	h	h	b
LG17	28	46921	h	b	h	h	h	h	h	b	h	h	h	b	a	b	h	h	b	b	b	h	h	h	b	h	a	a	a	a	h	h	a	a	h	a	a	h	h	b	b	a	h	b	h	a	h	h	b
LG17	29	8764	h	b	h	h	h	h	h	b	h	h	b	b	a	b	h	h	b	h	b	h	h	h	b	h	a	a	a	a	h	h	a	a	h	a	a	h	h	b	b	a	h	b	h	a	h	h	b
LG17	30	6398	h	b	h	h	h	h	h	b	h	h	b	b	a	b	h	h	b	h	b	a	h	h	b	h	a	a	a	a	h	h	a	a	h	a	a	h	h	b	b	a	h	b	h	a	h	h	b
LG17	31	6403	h	b	h	h	h	h	h	b	h	h	b	b	a	b	h	h	b	h	b	a	h	h	b	h	a	a	a	a	h	h	a	a	h	a	a	h	h	b	b	a	h	b	h	a	b	h	b
LG17	32	24276	h	b	h	h	h	h	h	b	h	h	b	b	a	b	h	h	b	h	h	a	h	h	b	h	a	a	a	a	h	h	a	a	h	a	a	h	h	b	h	a	h	b	h	a	b	h	b
LG17	33	30635	h	b	h	h	b	h	h	b	h	h	b	b	a	b	h	h	b	h	h	a	h	h	b	h	a	a	a	a	h	h	a	a	h	a	a	h	h	b	h	a	h	b	h	a	b	h	b
LG17	34	13924	h	b	h	h	b	h	h	b	h	h	b	b	a	b	h	h	h	h	h	a	h	h	b	h	a	a	a	a	h	h	a	a	h	a	a	h	h	b	h	a	h	b	h	a	b	h	b
LG17	35	5269	h	b	h	h	b	h	h	b	h	h	b	b	a	b	h	h	h	h	h	a	h	h	b	h	a	a	a	a	h	h	a	a	h	a	a	h	h	b	h	a	h	b	h	h	b	h	b
LG17	36	6632	h	b	h	h	b	h	h	b	h	h	b	b	a	b	h	h	h	h	h	a	h	h	b	h	a	a	h	a	h	h	a	a	h	a	a	h	h	b	h	a	h	b	h	h	b	h	b
LG17	37	835	h	b	h	h	b	h	h	b	h	h	b	b	a	b	h	h	h	h	h	a	h	h	b	a	a	a	h	a	h	h	a	a	h	a	a	h	h	h	h	a	h	b	h	h	b	h	b
LG17	38	6557	h	b	h	h	b	h	h	b	h	h	b	b	a	h	h	h	h	h	h	a	h	h	b	a	a	a	h	a	h	h	a	a	h	a	a	h	h	h	h	a	h	b	h	h	b	h	b
			0	0	2	0	1	1	1	1	1	1	1	0	1	1	1	1	1	1	1	2	1	0	0	1	1	1	2	2	0	0	0	1	0	1	0	1	0	1	2	2	1	0	1	2	2	1	1
			10_F2	16_F2	17_F2	18_F2	20_F2	37_F2	38_F2	39_F2	40_F2	41_F2	42_F2	43_F2	44_F2	46_F2	47_F2	48_F2	49_F2	50_F2	52_F2	53_F2	54_F2	55_F2	56_F2	57_F2	58_F2	59_F2	60_F2	61_F2	62_F2	63_F2	64_F2	67_F2	68_F2	69_F2	6_F2	71_F2	72_F2	73_F2	74_F2	75_F2	76_F2	78_F2	79_F2	80_F2	81_F2	85_F2	86_F2
LG18	1	267	a	h	b	b	b	a	a	h	b	h	a	h	h	b	a	h	h	h	h	a	h	h	b	h	b	b	h	b	b	a	h	a	h	h	a	b	h	a	b	h	b	h	a	a	h	a	h
LG18	2	6245	a	h	b	b	b	a	a	h	b	h	a	h	h	b	a	h	h	h	h	a	h	h	b	h	b	b	a	b	b	a	h	a	h	h	a	b	h	a	b	h	b	h	a	a	h	a	h
LG18	3	22705	a	h	b	b	b	a	a	h	b	h	a	h	h	b	a	h	h	h	h	a	h	h	b	h	b	b	a	b	b	h	h	a	h	h	a	b	h	a	b	h	b	h	a	a	h	a	h
LG18	4	1988	a	h	b	b	b	h	a	h	b	h	a	h	h	b	a	h	h	h	h	a	h	h	b	h	b	b	a	b	b	h	h	a	h	h	a	b	h	a	b	h	b	h	a	a	h	a	h
LG18	5	5049	a	h	b	b	b	h	a	h	b	h	a	h	h	b	a	h	h	h	h	h	h	h	b	h	b	b	a	b	b	h	h	a	h	h	a	b	h	a	b	h	b	h	a	a	h	a	h
LG18	6	12655	a	h	b	b	b	h	a	h	b	h	a	h	h	b	a	h	h	h	h	h	h	h	b	h	b	b	a	b	b	h	h	a	h	b	a	b	h	a	b	h	b	h	a	a	h	a	h
LG18	7	811	a	h	b	b	b	h	a	h	b	h	a	h	h	b	a	h	h	h	h	h	h	h	b	h	b	b	a	b	b	h	h	a	h	b	a	b	h	a	b	h	h	h	a	a	h	a	h
LG18	8	329	a	h	b	b	b	h	a	h	b	h	a	h	h	b	a	h	h	h	h	h	h	h	h	h	b	b	a	b	b	h	h	a	h	b	a	b	h	a	b	h	h	h	a	a	h	a	h
LG18	9	8441	a	h	b	b	b	h	h	h	b	h	a	h	h	b	a	h	h	h	b	h	h	h	h	h	b	b	a	b	b	h	h	a	h	b	a	b	h	a	b	h	h	h	a	a	h	a	h
LG18	10	24936	a	h	b	b	b	h	h	h	b	h	a	h	h	b	a	h	h	h	b	h	h	h	h	h	b	b	a	b	b	h	h	a	h	b	a	b	h	a	b	h	h	a	a	a	h	a	h
LG18	11	9508	a	h	b	b	b	h	h	h	b	h	a	h	h	b	a	h	h	h	b	h	h	h	h	h	b	b	a	b	b	h	h	a	h	b	h	b	h	a	b	h	h	a	a	a	h	a	h
LG18	12	14876	a	h	b	b	b	h	h	h	b	h	a	h	h	b	h	h	h	h	b	h	h	h	h	h	b	b	a	b	b	h	h	a	h	b	h	b	h	a	b	h	h	a	a	a	h	a	h
LG18	13	12808	a	h	b	b	b	h	h	h	b	h	a	h	h	b	h	h	h	h	b	h	h	h	h	h	b	b	a	b	b	h	h	a	h	b	h	b	h	a	b	b	h	a	a	a	h	a	h
LG18	14	5399	a	h	b	b	b	h	h	h	b	h	a	h	h	b	h	h	h	h	b	h	h	h	h	a	b	b	a	b	b	h	h	a	h	b	h	b	h	a	b	b	h	a	h	a	h	a	h
LG18	15	24442	a	h	b	h	b	h	h	h	b	h	a	h	h	b	h	h	h	h	b	h	h	h	h	a	b	b	a	b	b	h	h	a	h	b	h	b	h	a	b	b	h	a	h	a	h	a	h
LG18	16	4855	a	h	b	h	b	h	h	h	b	h	a	h	h	b	h	h	h	h	b	h	h	h	h	a	b	b	a	b	b	h	h	a	h	b	h	b	h	a	b	h	h	a	h	a	h	a	h
LG18	17	25409	a	h	b	h	b	h	h	a	b	h	a	h	h	b	h	h	h	h	b	h	h	h	h	a	b	b	a	b	b	h	h	a	h	b	h	b	h	a	b	h	h	a	h	a	h	a	h
LG18	18	26532	a	h	b	h	b	h	h	a	b	h	a	h	h	b	h	h	h	h	b	h	h	h	h	a	b	b	a	b	b	h	h	a	h	b	h	b	h	a	b	h	h	a	h	a	h	a	h
LG18	19	12209	a	h	b	a	b	h	h	a	b	h	a	h	h	b	h	h	h	a	b	h	h	h	h	a	b	b	a	b	b	h	h	h	h	b	h	b	h	h	b	h	h	a	h	a	h	a	h
LG18	20	21854	a	h	b	a	b	h	h	a	b	h	a	h	h	b	h	h	h	a	b	h	h	h	h	a	b	b	a	b	b	h	h	h	h	b	h	b	h	h	b	h	h	a	h	a	h	h	h
LG18	21	8231	a	a	b	a	h	h	h	a	b	h	a	h	h	b	h	h	h	a	b	h	h	h	h	a	b	b	a	h	b	h	h	h	h	b	h	b	h	h	b	h	h	a	h	a	h	h	h
LG18	22	16201	a	a	b	a	h	h	h	a	b	b	a	h	h	b	h	h	h	a	b	h	h	h	h	a	b	b	a	h	b	h	h	h	h	b	h	b	h	h	b	h	h	a	h	a	h	h	h
LG18	23	10032	a	a	b	a	h	h	h	a	b	b	a	h	h	b	h	h	h	a	b	h	b	h	h	a	b	b	a	h	b	h	h	h	h	b	h	b	h	h	b	h	h	a	h	a	h	h	h
LG18	24	2017	a	a	b	a	h	h	h	a	h	b	a	h	h	b	h	h	h	a	b	h	b	h	h	a	b	b	a	h	b	h	h	h	h	b	h	b	h	h	b	h	h	a	h	a	h	h	h
LG18	25	22081	a	a	b	a	h	h	h	a	h	b	a	h	h	b	h	h	h	a	b	h	b	h	h	a	b	b	a	h	b	h	h	b	h	b	h	b	h	h	b	h	h	a	h	a	h	h	h
LG18	26	2077	a	a	b	a	h	h	h	a	h	b	a	h	h	b	h	h	h	a	b	h	b	h	h	a	b	b	a	h	b	h	h	b	h	b	h	b	a	h	b	h	h	a	h	a	h	h	h
LG18	27	15362	a	a	b	a	h	h	h	a	h	b	a	h	h	b	h	h	h	a	b	h	b	h	h	a	b	b	a	h	b	h	h	b	h	h	h	b	a	h	b	h	h	a	h	a	h	h	h
LG18	28	5626	a	a	b	a	h	h	h	a	h	h	a	h	h	b	h	h	h	a	b	h	b	h	h	a	b	b	a	h	b	h	h	b	h	h	h	b	a	h	b	h	h	a	h	a	h	h	h
LG18	29	15536	a	a	b	a	h	h	h	a	h	h	a	h	h	b	h	h	h	a	b	h	b	h	h	a	b	b	a	h	b	h	h	b	h	h	h	b	a	b	b	h	h	a	h	a	h	h	h
LG18	30	6526	a	a	b	a	h	h	h	a	h	h	a	h	h	b	h	h	h	a	b	h	b	h	h	a	b	h	a	h	b	h	h	b	h	h	h	b	a	b	b	h	h	a	h	a	h	h	h
LG18	31	8348	a	a	h	a	h	h	h	a	h	h	a	h	h	b	h	h	h	a	b	h	b	h	h	a	b	h	a	h	b	h	h	b	h	h	h	b	a	b	b	h	h	a	h	a	h	h	h
LG18	32	35755	a	a	h	a	h	h	h	a	h	h	a	h	h	b	h	h	h	a	b	h	b	h	h	a	b	h	a	h	b	h	h	b	h	h	h	b	a	b	b	h	h	a	h	a	a	h	h
LG18	33	4329	a	a	h	a	h	h	h	a	h	h	a	h	h	b	h	h	h	a	b	h	b	h	h	h	b	h	a	h	b	h	h	b	h	h	h	b	a	b	b	h	h	a	h	a	a	h	h
LG18	34	4365	a	a	h	a	h	h	h	a	h	h	a	h	h	b	h	h	h	a	b	h	h	h	h	h	b	h	a	h	b	h	h	b	h	h	h	b	a	b	b	h	h	a	h	a	a	h	h
LG18	35	17286	a	a	h	a	h	h	h	a	h	h	a	h	h	b	b	h	h	a	b	h	h	h	h	h	b	h	a	h	b	h	h	b	h	h	h	b	a	b	b	h	h	a	h	a	a	h	h
LG18	36	7307	a	a	h	a	h	h	h	a	h	h	a	h	h	b	b	h	h	a	b	b	h	h	h	h	b	h	a	h	b	h	h	b	h	h	h	b	a	b	b	h	h	a	h	a	a	h	h
LG18	37	11765	a	a	h	a	h	h	h	a	h	h	a	h	h	b	b	h	h	a	h	b	h	h	h	h	b	h	a	h	b	h	h	b	h	h	h	b	a	b	b	h	h	a	h	a	a	h	h
LG18	38	1736	a	a	h	a	h	h	h	a	h	h	a	h	h	b	b	h	h	a	h	b	h	h	h	h	b	h	a	h	b	b	h	b	h	h	h	b	a	b	b	h	h	a	h	a	a	h	h
LG18	39	1252	a	a	h	a	h	h	h	a	h	h	a	h	h	b	b	h	h	a	h	b	h	h	h	h	b	h	a	h	b	b	h	b	h	h	h	b	a	b	b	h	h	a	b	a	a	h	h
LG18	40	16429	a	a	h	a	h	h	h	h	h	h	a	h	h	b	b	h	h	a	h	b	h	h	h	h	b	h	a	h	b	b	h	b	h	h	h	b	a	b	b	h	h	a	b	a	a	h	h
LG18	41	6299	a	a	h	a	h	h	b	h	h	h	a	h	h	b	b	h	h	a	h	b	h	h	h	h	b	h	a	h	b	b	h	b	h	h	h	b	a	b	b	h	h	a	b	a	a	h	h
		total recombination events per LG	0	1	1	2	1	1	2	1	2	2	0	0	0	0	2	0	0	1	2	2	2	0	1	2	0	1	1	1	0	2	0	2	0	2	1	0	1	2	0	2	1	1	2	0	1	1	0
			10_F2	16_F2	17_F2	18_F2	20_F2	37_F2	38_F2	39_F2	40_F2	41_F2	42_F2	43_F2	44_F2	46_F2	47_F2	48_F2	49_F2	50_F2	52_F2	53_F2	54_F2	55_F2	56_F2	57_F2	58_F2	59_F2	60_F2	61_F2	62_F2	63_F2	64_F2	67_F2	68_F2	69_F2	6_F2	71_F2	72_F2	73_F2	74_F2	75_F2	76_F2	78_F2	79_F2	80_F2	81_F2	85_F2	86_F2
LG19	1	1481	b	b	h	h	b	b	b	h	b	h	h	b	a	b	a	b	b	h	h	a	h	b	h	b	h	h	h	a	b	h	b	h	a	h	h	h	h	b	b	h	b	a	a	h	b	b	h
LG19	2	9477	b	b	h	h	b	b	b	h	b	h	h	b	a	b	a	b	b	h	h	a	h	b	h	b	h	h	h	a	b	h	b	h	a	h	h	a	h	b	b	h	b	a	a	h	b	b	h
LG19	3	7546	h	b	h	h	b	b	b	h	b	h	h	b	a	b	a	b	b	h	h	a	h	b	h	b	h	h	h	a	b	h	b	h	a	h	h	a	h	b	b	h	b	a	a	h	b	b	h
LG19	4	2307	h	b	h	h	b	b	b	h	b	h	h	b	a	b	a	b	b	h	h	a	h	b	h	b	h	h	h	a	b	h	b	h	a	h	h	a	h	b	b	h	b	a	a	h	h	b	h
LG19	5	457	h	b	h	h	b	b	b	h	b	h	h	b	a	b	a	b	b	h	h	a	h	b	h	b	h	h	h	a	h	h	b	h	a	h	h	a	h	b	b	h	b	a	a	h	h	b	h
LG19	6	1464	h	b	h	h	b	b	b	h	b	h	h	b	a	b	a	b	b	h	h	a	h	b	h	b	h	h	h	a	h	h	b	h	a	h	h	a	h	b	b	h	b	a	h	h	h	b	h
LG19	7	42654	h	b	h	h	b	b	b	h	b	h	h	b	a	b	a	b	b	h	h	a	h	b	h	b	h	h	h	a	h	h	b	h	a	h	h	a	h	b	b	h	b	a	h	h	h	b	h
LG19	8	774	h	b	h	h	b	b	b	h	b	h	h	b	a	b	a	b	b	h	h	a	h	b	h	b	h	h	a	a	h	h	b	h	a	h	h	a	h	b	b	h	b	a	h	h	h	b	h
LG19	9	4707	h	b	h	h	b	b	b	h	b	h	h	b	a	b	a	b	b	a	h	a	h	b	h	b	h	h	a	a	h	h	b	h	a	h	h	a	h	b	b	h	b	a	h	h	h	b	h
LG19	10	16090	h	b	h	h	b	b	b	h	b	h	h	b	a	b	a	b	b	a	h	a	h	b	h	b	h	h	a	a	h	h	b	h	a	h	h	a	h	b	b	h	b	h	h	h	h	b	h
LG19	11	24670	h	b	h	h	b	b	b	h	b	h	h	b	a	b	a	b	b	a	h	a	h	b	h	b	h	h	a	a	h	h	b	h	a	h	h	a	h	b	b	h	b	h	h	h	h	h	h
LG19	12	34840	h	b	h	h	b	b	b	h	b	h	h	b	a	b	a	b	b	a	h	a	h	b	h	b	h	h	a	a	h	h	b	h	a	h	b	a	h	b	h	h	b	h	h	h	h	h	h
LG19	13	12146	h	b	h	h	b	b	b	h	b	h	h	b	a	b	a	b	b	a	h	a	h	b	h	b	h	h	a	a	h	h	b	h	a	h	h	a	h	b	h	h	b	h	h	h	h	h	h
LG19	14	17026	h	b	h	h	b	b	b	h	b	h	h	b	a	h	a	b	b	a	h	a	h	b	h	b	h	h	a	a	h	h	b	h	a	h	h	a	h	b	h	h	b	h	h	h	h	h	h
LG19	15	797	h	b	h	h	b	b	b	h	b	h	h	b	a	h	a	b	b	a	h	a	h	b	h	b	h	b	a	a	h	h	b	h	a	h	h	a	h	b	h	h	b	h	h	h	h	h	h
LG19	16	2400	h	b	h	h	b	b	b	h	b	h	h	b	a	h	a	b	b	a	h	a	h	b	h	b	h	b	a	a	h	h	b	h	h	h	h	a	h	b	h	h	b	h	h	h	h	h	h
LG19	17	10221	h	b	h	h	b	b	b	h	b	h	h	b	h	h	a	b	b	a	h	a	h	b	h	b	h	b	a	a	h	h	b	h	h	h	h	a	h	b	h	h	b	h	h	h	h	h	h
LG19	18	465	h	b	h	h	b	b	b	h	b	h	h	b	h	h	a	b	b	a	h	a	h	b	h	b	h	b	a	a	h	a	b	h	h	h	h	a	h	b	h	a	b	h	h	h	h	h	h
LG19	19	3463	h	b	h	h	b	b	b	b	b	h	h	b	h	h	a	b	b	a	h	a	h	b	h	h	h	b	a	a	h	a	b	h	h	h	h	a	h	b	h	a	b	h	h	h	h	h	h
LG19	20	8416	h	b	h	h	b	b	b	b	b	h	h	b	h	h	a	b	b	a	h	a	h	b	h	h	h	b	a	a	h	a	b	h	h	h	h	a	h	b	h	a	b	h	h	h	h	h	b
LG19	21	2676	h	b	h	h	b	b	b	b	b	h	h	b	h	h	a	b	b	a	h	a	h	b	h	h	h	b	a	a	h	a	b	h	h	h	h	a	h	h	h	a	b	h	h	h	h	h	b
LG19	22	35811	h	b	h	h	b	b	b	b	b	h	h	b	h	h	a	b	b	a	h	a	h	b	h	h	h	b	a	a	a	a	b	h	h	h	h	a	h	h	h	a	b	h	h	h	h	h	b
LG19	23	18	h	b	h	h	b	b	b	b	b	h	h	b	h	h	a	b	b	a	h	a	h	b	h	a	h	b	a	a	a	a	b	b	h	h	h	a	h	h	h	a	b	h	h	h	h	h	b
LG19	24	8041	h	b	h	h	h	b	b	b	b	h	h	b	h	h	a	b	b	a	h	a	h	b	h	a	h	b	a	a	a	a	b	b	h	h	h	a	h	h	h	a	b	h	h	h	h	h	b
LG19	25	3015	h	b	h	h	h	b	b	b	b	h	h	b	h	h	a	b	h	a	h	a	h	b	h	a	h	b	a	a	a	a	b	b	h	h	h	a	h	h	h	a	b	h	h	h	h	h	b
LG19	26	45210	h	b	h	h	h	b	b	b	b	h	h	b	h	h	a	b	h	a	h	a	h	b	h	a	a	b	a	a	a	a	b	b	h	h	h	a	h	h	h	a	b	h	h	h	h	h	b
LG19	27	43562	h	b	h	h	h	b	b	b	b	h	h	b	h	h	a	b	h	a	h	a	h	b	h	a	a	b	a	a	a	a	b	b	h	h	h	a	h	h	h	a	b	h	h	h	h	h	b
LG19	28	4814	h	b	h	h	h	b	b	b	b	h	h	b	h	h	a	b	h	a	h	a	h	b	h	a	a	b	a	a	a	a	b	b	h	h	h	h	h	h	h	a	b	h	h	h	h	h	b
LG19	29	37818	h	b	b	h	h	b	b	b	b	h	h	b	h	h	a	b	h	a	h	a	h	b	h	a	a	b	a	a	a	a	b	b	h	h	h	h	h	h	h	a	b	h	h	h	h	h	b
LG19	30	29943	h	b	b	h	h	b	b	b	h	h	h	b	h	h	a	b	h	a	h	a	h	b	h	a	a	b	a	a	a	a	b	b	h	h	h	h	h	h	h	a	b	h	h	h	h	h	b
LG19	31	6240	h	b	b	h	h	b	b	b	h	h	h	b	h	h	a	h	h	a	h	a	h	b	h	a	a	b	a	a	a	a	b	b	h	h	h	h	h	h	h	a	b	h	h	h	h	h	b
LG19	32	780	h	b	b	h	a	b	b	b	h	h	h	b	h	h	a	h	h	a	h	a	h	b	h	a	a	b	a	a	a	a	b	b	h	h	h	h	h	h	h	a	b	h	h	a	h	h	b
LG19	33	38047	h	b	b	h	a	b	b	b	h	h	h	b	h	h	a	h	h	a	h	a	h	b	h	a	a	b	a	a	a	a	b	b	h	h	h	h	h	h	h	a	b	h	b	a	h	h	b
LG19	34	42710	h	b	b	h	a	b	b	b	h	h	h	b	h	h	a	h	h	h	h	a	h	b	h	a	a	b	a	a	a	a	b	b	h	h	h	h	h	h	h	a	b	h	b	a	h	h	b
LG19	35	60451	h	b	b	h	a	b	b	b	h	h	h	b	h	h	a	h	h	h	h	a	h	b	h	a	a	b	a	a	a	a	h	b	h	a	h	h	h	h	h	a	b	h	b	a	h	h	b
LG19	36	7027	h	b	b	h	a	b	b	b	h	h	h	b	h	h	a	h	h	h	h	a	h	b	h	a	a	b	a	a	a	a	h	b	h	a	h	h	h	h	h	h	b	h	b	a	h	h	b
LG19	37	4533	h	b	b	h	a	b	b	b	h	h	h	h	h	h	a	h	h	h	h	a	h	b	h	a	a	b	a	a	a	a	h	b	h	a	h	h	h	h	h	h	b	h	b	a	h	h	b
LG19	38	3000	h	b	b	h	a	b	b	h	h	h	h	h	h	h	a	h	h	h	h	a	h	b	h	a	a	b	a	a	a	a	h	b	h	a	h	h	h	h	h	h	b	h	b	a	h	h	b
LG19	39	25194	h	b	b	h	a	b	b	h	h	h	h	h	h	h	a	h	h	h	h	a	h	b	h	a	a	h	a	a	a	a	h	b	h	a	h	h	h	h	h	h	b	h	b	a	h	h	b
LG19	40	13140	h	h	b	h	a	h	h	h	h	h	a	h	h	h	a	h	h	h	h	a	h	b	h	a	a	h	a	a	a	a	h	b	h	a	h	h	h	h	h	h	b	h	b	a	a	h	b
LG19	41	13519	h	h	b	h	a	h	h	h	h	h	a	h	h	h	h	h	h	h	h	a	h	b	h	a	a	h	a	a	a	a	h	b	h	a	h	h	h	h	h	h	b	h	b	a	a	h	b
LG19	42	5724	a	h	b	h	a	h	h	h	h	h	a	h	h	h	h	h	h	h	h	h	h	b	h	a	a	h	a	a	a	a	h	b	h	a	h	h	h	h	h	h	b	h	b	a	a	h	b
LG19	43	4925	a	h	b	h	a	h	h	h	h	b	a	h	h	h	h	h	h	h	h	h	h	b	h	a	a	h	a	a	a	a	h	b	h	a	h	h	h	h	h	h	b	h	b	a	a	h	b
LG19	44	2584	a	h	b	a	a	h	h	h	h	b	a	h	h	h	h	h	h	h	h	h	h	b	h	a	a	h	a	a	a	a	h	b	h	a	h	h	h	h	h	h	b	h	b	a	a	h	b
LG19	45	29887	a	h	b	a	a	h	h	h	h	b	a	h	h	h	h	h	h	h	h	h	h	b	h	a	a	h	a	h	a	a	h	b	h	a	h	h	h	h	h	h	b	h	b	a	a	h	b
LG19	46	48259	a	h	b	a	a	h	h	h	h	b	a	h	h	h	h	h	h	h	h	h	h	b	h	a	a	h	h	h	a	a	h	b	h	a	h	h	h	h	h	h	b	h	b	a	a	h	b
LG19	47	15378	a	h	b	a	a	h	h	h	h	b	a	h	h	h	h	h	h	h	h	h	h	b	h	a	a	h	h	h	a	a	h	b	h	a	h	h	h	h	h	h	b	h	b	a	a	h	h
LG19	48	2130	a	h	b	a	a	h	h	h	h	b	a	h	h	h	h	h	h	h	h	h	h	b	h	a	a	h	h	h	a	a	h	b	h	a	h	h	h	a	h	h	h	h	b	a	a	h	h
		total recombination events per LG	2	1	1	1	2	1	1	2	1	1	1	1	1	1	1	1	1	2	0	1	0	0	0	2	1	2	2	1	2	1	1	1	1	1	2	2	0	2	1	2	1	1	2	1	2	1	2
LG19		59163	h	b	h	h	b	b	b	h	b	h	h	b	a	b	a	b	b	h	h	a	h	b	h	b	h	h	h	h	h	h	b	h	a	h	h	a	h	b	b	h	b	a	h	h	h	b	h
			10_F2	16_F2	17_F2	18_F2	20_F2	37_F2	38_F2	39_F2	40_F2	41_F2	42_F2	43_F2	44_F2	46_F2	47_F2	48_F2	49_F2	50_F2	52_F2	53_F2	54_F2	55_F2	56_F2	57_F2	58_F2	59_F2	60_F2	61_F2	62_F2	63_F2	64_F2	67_F2	68_F2	69_F2	6_F2	71_F2	72_F2	73_F2	74_F2	75_F2	76_F2	78_F2	79_F2	80_F2	81_F2	85_F2	86_F2
LG20	1	460	a	b	a	b	b	h	a	a	h	b	h	a	b	b	b	b	h	b	h	h	h	a	h	h	h	h	b	h	h	h	h	h	a	b	h	h	b	h	h	h	h	h	h	h	a	b	b
LG20	2	2000	a	b	a	b	b	h	a	h	h	b	h	a	b	b	b	b	h	b	h	h	h	a	h	h	h	h	b	h	h	h	h	h	a	b	h	h	b	h	h	h	h	h	h	h	a	b	b
LG20	3	11119	a	b	a	b	b	h	a	h	h	b	h	a	b	b	b	b	h	b	h	h	h	a	h	h	h	h	h	h	h	h	h	h	a	b	h	h	b	h	h	h	h	h	h	h	a	b	b
LG20	4	45678	a	b	a	b	b	h	a	h	b	b	h	a	b	b	b	b	h	b	h	h	h	a	h	h	h	h	h	h	h	h	h	h	a	b	h	h	b	h	h	h	h	h	h	h	a	b	b
LG20	5	1615	a	b	a	b	b	h	a	h	b	b	h	a	b	b	b	b	h	b	h	h	h	h	h	h	h	h	h	h	h	h	h	h	a	b	h	h	b	h	h	h	h	h	h	h	a	b	b
LG20	6	18418	a	b	a	h	b	h	a	h	b	b	h	a	b	b	b	b	h	b	h	h	h	h	h	h	h	h	h	h	h	h	h	b	a	b	h	b	b	h	h	h	h	h	h	h	a	b	b
LG20	7	216	a	b	a	h	b	h	a	h	b	b	h	a	b	b	b	b	h	b	h	a	h	h	b	h	h	h	h	h	h	h	h	b	a	b	h	b	b	h	h	h	h	h	h	h	a	b	b
LG20	8	118	a	b	a	h	b	h	a	h	b	b	h	a	b	b	b	b	h	b	h	a	h	h	b	h	b	h	h	h	h	h	h	b	a	b	h	b	b	h	h	h	h	h	h	h	a	b	b
LG20	9	19536	a	b	a	h	b	h	h	h	b	b	h	a	b	b	b	b	h	b	h	a	h	h	b	h	b	h	h	h	h	h	h	b	a	b	h	b	b	h	h	h	b	h	h	h	a	b	b
LG20	10	23716	a	b	a	h	b	h	h	h	b	b	h	a	b	b	h	b	h	b	h	a	h	h	b	h	b	h	h	h	h	h	h	b	a	b	h	b	b	h	h	h	b	h	h	h	a	b	b
LG20	11	1294	a	b	a	h	h	h	h	h	b	b	h	a	b	b	h	b	h	b	h	a	h	h	b	h	b	h	h	h	h	h	h	b	a	b	h	b	b	h	h	h	b	h	h	h	a	b	b
LG20	12	21129	a	b	a	h	h	h	h	h	b	b	h	a	b	b	h	b	h	b	h	a	h	h	b	h	b	h	h	h	h	h	h	b	a	b	h	b	b	h	h	b	b	h	h	h	a	b	b
LG20	13	20124	a	b	a	h	h	h	h	h	b	b	h	a	b	b	h	b	h	b	h	a	h	h	b	h	b	h	h	h	h	h	h	b	a	b	h	b	b	h	h	b	b	h	a	h	a	b	h
LG20	14	17381	a	b	a	h	h	h	h	h	b	b	h	a	b	b	h	b	h	b	h	a	h	h	b	h	b	h	h	h	h	h	h	b	a	b	h	b	b	h	h	b	b	a	a	h	a	b	h
LG20	15	153	a	b	a	h	h	h	h	h	b	b	h	a	b	b	h	b	h	b	h	a	h	h	b	h	b	h	h	h	h	h	h	b	a	b	h	b	b	a	h	b	b	a	a	h	a	b	h
LG20	16	13641	a	b	a	h	h	h	h	h	b	b	h	a	b	h	h	b	h	b	h	a	h	h	b	h	b	h	h	h	h	h	h	b	a	b	h	b	b	a	h	b	b	a	a	h	a	b	h
LG20	17	3515	a	b	a	h	h	h	h	h	b	b	h	a	b	h	h	b	h	b	h	a	h	h	b	h	b	h	h	h	h	h	h	b	a	h	h	b	b	a	h	b	b	a	a	h	a	b	h
LG20	18	4218	a	b	a	h	h	h	h	h	b	b	h	a	b	h	h	b	h	b	h	a	h	h	b	h	b	h	h	a	h	h	h	b	a	h	h	b	b	a	h	b	b	a	a	h	a	b	h
LG20	19	3109	a	b	a	h	h	h	h	h	b	b	h	a	b	h	h	b	h	b	h	a	h	h	b	h	b	h	h	a	h	a	h	b	a	h	h	b	b	a	h	b	b	a	a	h	a	b	h
LG20	20	6635	a	b	h	h	h	h	h	h	b	b	h	a	b	h	h	b	h	b	h	a	h	h	b	h	b	h	h	a	h	a	h	b	a	h	h	b	b	a	h	b	b	a	a	h	a	b	h
LG20	21	20538	a	b	h	h	h	h	h	h	b	b	h	a	b	h	h	b	h	b	h	a	h	h	b	h	b	h	h	a	h	a	h	b	a	h	h	b	b	a	h	b	b	a	a	h	a	h	h
LG20	22	2844	a	b	h	h	h	h	h	h	b	b	h	a	b	h	h	b	h	b	h	a	h	h	b	h	b	h	h	a	h	a	h	b	a	h	a	b	b	a	h	b	b	a	a	h	a	h	h
LG20	23	2531	a	h	h	h	h	h	h	h	b	b	h	a	b	h	h	b	h	b	h	a	h	h	b	h	b	h	h	a	h	a	h	b	a	h	a	b	b	a	h	b	b	a	a	h	a	h	h
LG20	24	54733	a	h	h	h	h	h	b	h	b	b	h	a	b	h	h	b	h	b	a	a	h	h	b	h	b	b	h	a	h	a	h	b	a	h	a	b	b	a	h	b	b	a	a	h	h	h	h
LG20	25	60273	a	h	h	h	h	h	b	h	b	b	h	a	b	h	h	b	b	b	a	a	h	h	b	h	b	b	h	a	h	a	h	b	a	h	a	b	b	a	h	b	b	a	a	h	h	h	h
LG20	26	26218	a	h	h	h	h	h	b	h	b	b	h	a	b	h	h	b	b	b	a	a	b	h	b	h	b	b	h	a	h	a	h	b	a	h	a	b	b	a	h	b	b	a	a	h	h	h	h
LG20	27	2858	a	h	h	h	h	h	b	h	b	b	h	a	b	h	h	b	b	b	a	a	b	h	b	h	h	b	h	a	h	a	h	b	a	h	a	b	b	a	h	b	b	a	a	h	h	h	h
LG20	28	5715	a	h	h	h	h	h	b	h	b	b	h	a	b	h	h	b	b	b	a	a	b	h	b	h	h	b	h	a	h	a	h	b	a	h	a	b	b	a	h	b	b	a	a	h	h	h	h
LG20	29	12591	a	h	h	h	h	h	b	h	b	b	h	a	b	h	h	b	b	b	a	a	b	h	b	h	h	b	h	a	h	a	h	b	a	h	a	b	b	a	h	b	b	a	a	h	h	h	h
LG20	30	1532	a	h	h	h	h	h	b	h	b	b	h	a	b	h	h	b	b	b	a	a	b	h	b	h	h	b	h	a	h	a	h	b	a	h	a	b	h	a	h	b	b	a	a	h	h	h	h
LG20	31	18991	a	h	h	h	h	h	b	h	b	b	h	a	b	h	h	b	b	b	a	a	b	h	b	h	h	b	h	a	h	a	h	b	a	h	a	b	h	a	h	b	b	a	h	h	h	h	h
LG20	32	23510	a	h	h	h	h	h	b	h	b	b	h	h	b	h	h	b	b	b	a	a	b	h	b	h	h	b	h	a	h	a	h	b	a	h	a	b	h	a	h	b	b	a	h	h	h	h	h
LG20	33	776	a	h	h	h	h	h	b	h	b	b	h	h	b	h	h	b	b	b	a	h	b	h	b	h	h	b	h	a	h	a	h	b	a	h	a	b	h	a	h	b	b	a	h	h	h	h	h
LG20	34	1565	a	h	h	h	h	h	b	h	b	b	h	h	b	h	h	b	b	b	a	h	b	h	b	h	h	b	h	a	h	a	h	b	a	h	h	b	h	a	h	b	b	a	h	h	h	h	h
LG20	35	162	a	h	h	h	h	h	b	h	b	b	h	h	h	h	h	b	b	b	a	h	b	h	b	h	h	b	h	a	h	a	h	b	a	h	h	b	h	a	h	b	b	a	h	h	h	h	h
LG20	36	1725	a	h	h	h	h	h	b	h	b	b	h	h	h	h	a	b	b	b	a	h	b	h	b	h	h	b	h	a	h	a	h	b	a	h	h	b	h	a	h	b	b	a	h	h	h	h	h
LG20	37	24029	a	h	h	h	h	h	b	h	b	b	h	h	h	h	a	b	b	b	a	h	b	h	b	h	h	b	h	a	h	a	h	b	a	h	h	b	h	a	h	b	b	h	h	h	h	h	h
LG20	38	55016	a	h	h	h	h	h	b	h	b	b	h	h	h	h	a	b	b	b	a	h	b	h	b	h	h	b	h	a	h	a	h	b	a	h	h	b	h	a	h	h	b	h	h	h	h	h	h
LG20	39	21759	a	h	h	h	h	h	b	h	b	b	h	h	h	h	a	b	b	b	a	h	b	h	b	h	h	b	h	a	h	a	h	b	a	h	h	b	h	a	h	h	h	h	h	h	h	h	h
LG20	40	24175	a	h	h	h	h	h	b	h	b	b	h	h	h	h	a	b	b	b	a	h	b	h	b	h	h	b	h	a	h	a	h	b	h	h	h	b	h	a	h	h	h	h	h	h	h	h	h
LG20	41	42373	a	h	h	h	h	h	b	h	b	b	h	h	h	h	a	b	b	b	a	h	b	b	b	h	h	b	h	a	h	a	h	b	h	h	h	b	h	a	h	h	h	h	h	h	h	h	h
LG20	42	7043	a	b	h	h	h	h	b	h	b	b	h	h	h	h	a	b	b	b	a	h	b	b	b	h	h	b	h	a	h	a	h	b	h	h	h	b	h	a	h	h	h	h	h	h	h	h	h
		total recombination events per LG	0	2	1	1	1	0	2	1	1	0	0	1	1	1	2	0	1	0	1	2	1	2	1	0	2	1	1	1	0	1	0	1	1	1	2	1	1	1	0	2	2	2	2	0	1	1	1
			10_F2	16_F2	17_F2	18_F2	20_F2	37_F2	38_F2	39_F2	40_F2	41_F2	42_F2	43_F2	44_F2	46_F2	47_F2	48_F2	49_F2	50_F2	52_F2	53_F2	54_F2	55_F2	56_F2	57_F2	58_F2	59_F2	60_F2	61_F2	62_F2	63_F2	64_F2	67_F2	68_F2	69_F2	6_F2	71_F2	72_F2	73_F2	74_F2	75_F2	76_F2	78_F2	79_F2	80_F2	81_F2	85_F2	86_F2
LG21	1	734	h	h	h	a	h	b	b	b	h	h	a	a	h	a	h	a	a	h	b	h	a	b	h	b	b	b	b	a	h	h	b	h	h	a	a	b	a	h	b	a	h	h	a	b	a	a	b
LG21	2	1940	h	h	h	a	h	b	b	b	h	h	a	a	h	a	h	a	a	h	b	h	a	b	h	b	b	b	b	a	h	h	b	h	a	a	a	b	a	h	b	a	h	h	a	b	a	a	b
LG21	3	15746	h	h	h	a	h	b	b	b	h	h	a	a	h	a	h	a	a	h	b	h	a	b	h	b	b	b	b	a	h	h	b	h	a	a	a	b	a	h	b	h	h	h	a	b	a	a	b
LG21	4	8239	h	h	h	a	h	b	b	b	h	h	a	a	h	a	h	a	a	h	b	h	a	b	h	b	b	b	b	a	h	h	b	h	a	a	h	b	a	h	b	h	h	h	a	b	a	a	b
LG21	5	17069	h	h	h	a	h	b	b	b	h	h	a	a	h	a	h	a	a	h	b	h	a	b	h	b	b	b	b	a	h	h	b	h	a	a	h	b	a	h	b	h	h	h	h	b	a	a	b
LG21	6	9093	h	h	h	a	h	b	b	b	h	h	a	a	h	a	h	a	h	h	b	h	a	b	h	b	b	b	b	a	h	h	b	h	a	a	h	b	a	h	b	h	h	h	h	b	a	a	b
LG21	7	30374	h	h	h	a	h	b	h	b	h	h	a	a	h	a	h	a	h	h	b	h	a	b	h	b	b	b	b	a	h	h	b	h	a	a	h	b	a	h	b	h	h	h	h	b	a	a	b
LG21	8	5862	h	h	h	a	h	b	h	b	h	h	a	a	h	a	h	a	h	h	b	h	a	b	h	b	b	b	h	a	h	h	b	h	a	a	h	b	a	h	b	h	h	h	h	b	a	a	b
LG21	9	13713	h	h	h	a	h	b	h	b	h	h	a	a	h	a	h	a	h	h	b	a	a	b	h	b	b	b	h	a	h	h	b	h	a	a	h	b	a	h	b	h	h	h	h	b	a	a	b
LG21	10	16459	h	h	h	a	h	b	h	b	h	h	a	a	h	a	h	a	h	h	b	a	a	b	h	b	b	b	h	a	h	h	b	h	a	a	h	b	a	h	b	h	h	h	h	b	a	a	b
LG21	11	2482	h	h	h	a	h	b	h	b	a	h	a	a	h	a	h	a	h	h	b	a	a	b	h	h	b	b	h	a	h	h	b	h	a	a	h	b	a	h	b	h	h	h	h	b	a	a	b
LG21	12	51744	h	h	h	a	h	b	h	b	a	h	a	a	h	a	h	a	h	h	b	a	a	b	h	h	b	b	h	a	h	h	b	h	a	a	h	b	a	h	b	h	h	b	h	b	a	a	b
LG21	13	22457	h	h	h	a	h	b	h	b	a	a	a	a	h	a	a	a	h	h	b	a	a	b	h	h	b	b	h	a	h	h	b	h	a	a	h	b	a	h	b	h	h	b	h	b	a	a	b
LG21	14	1361	h	h	h	a	h	b	h	b	a	a	a	a	h	a	a	a	h	h	b	a	a	b	h	h	b	b	h	a	h	h	b	h	a	a	h	b	a	h	b	h	h	b	h	b	a	a	b
LG21	15	16665	h	h	h	a	h	b	h	b	a	a	a	a	h	a	a	h	h	h	b	a	a	b	h	h	h	b	h	a	h	h	b	h	a	a	h	b	a	h	b	h	h	b	h	b	a	a	b
LG21	16	7268	h	h	a	a	h	b	h	b	a	a	a	a	h	a	a	h	h	h	b	a	a	b	h	h	h	b	h	a	h	h	b	h	a	a	h	b	a	h	b	h	h	b	h	b	a	a	b
LG21	17	16376	h	h	a	a	h	b	h	b	a	a	a	a	h	a	a	h	h	h	b	a	a	b	h	h	h	b	h	a	h	h	b	h	h	a	h	b	a	h	b	h	h	b	h	b	a	a	b
LG21	18	48477	h	h	a	a	h	b	h	b	a	a	a	a	h	a	a	h	h	h	b	a	a	b	h	h	h	b	h	a	h	h	b	a	h	a	h	b	a	h	b	h	h	b	h	b	a	a	b
LG21	19	11439	h	h	a	a	h	b	h	b	a	a	a	a	h	a	a	h	h	h	b	a	a	b	h	h	h	b	h	a	h	h	b	a	h	a	h	b	a	h	b	h	h	b	h	b	a	a	h
LG21	20	6741	h	h	a	a	h	b	h	b	a	a	a	a	h	a	a	h	h	h	b	a	a	b	h	h	h	b	h	a	h	h	b	h	h	a	h	b	a	h	b	h	h	b	h	b	a	a	h
LG21	21	3260	h	h	a	a	a	b	h	b	a	a	a	a	h	a	a	h	h	h	b	a	a	b	h	h	h	b	h	a	h	h	b	h	h	a	h	b	a	h	b	h	h	b	h	b	a	a	h
LG21	22	14960	h	h	a	a	a	b	h	b	a	a	a	a	h	a	a	h	h	h	b	a	a	b	h	h	h	b	h	a	h	h	b	h	h	a	b	b	a	h	b	h	h	b	h	b	a	a	h
LG21	23	23247	h	h	a	a	a	b	h	b	a	h	a	a	h	a	a	h	h	h	b	a	a	b	h	h	h	b	h	a	h	h	b	h	h	a	b	b	a	h	b	h	h	b	h	b	a	a	h
LG21	24	2508	h	h	a	a	a	b	h	b	a	h	h	a	h	a	a	h	h	h	b	a	a	b	h	h	h	b	h	a	h	h	b	h	h	a	b	b	a	h	b	h	h	b	h	h	a	a	h
LG21	25	16553	h	h	a	a	a	b	h	b	a	h	h	a	h	a	a	h	h	b	b	a	a	b	h	h	h	b	h	a	h	h	b	h	h	a	b	b	a	h	b	h	h	b	h	h	a	a	h
LG21	26	28017	h	h	a	a	a	b	h	b	a	h	h	a	h	a	h	h	h	b	b	a	a	b	h	h	h	b	h	a	h	h	b	h	h	a	b	b	a	h	b	h	h	b	h	h	a	a	h
LG21	27	6527	h	h	a	a	a	b	h	b	a	h	h	a	h	a	h	h	h	b	b	a	a	b	h	h	h	b	h	h	h	h	h	h	h	a	b	b	a	h	b	h	h	b	h	h	a	a	h
LG21	28	2280	h	h	a	a	h	b	h	b	a	h	h	a	h	a	h	h	h	b	b	a	a	b	h	h	h	b	h	h	h	h	h	h	h	a	b	b	a	h	b	h	h	b	h	h	a	a	h
LG21	29	1321	h	h	a	h	h	b	h	b	a	h	h	a	h	a	h	h	h	b	b	a	a	b	h	h	h	b	h	h	h	h	h	h	h	a	b	b	a	h	b	h	h	b	h	h	a	a	h
LG21	30	2621	h	h	a	h	h	b	h	b	a	h	h	a	h	a	h	h	h	b	b	a	a	b	h	h	h	b	h	h	h	h	h	h	h	a	b	b	a	h	b	h	h	b	h	h	a	a	a
LG21	31	6695	h	h	a	h	h	b	h	b	a	h	h	a	h	a	h	h	h	b	b	a	a	b	h	h	h	b	h	h	h	h	h	h	h	a	b	b	a	h	b	h	h	h	h	h	a	a	a
LG21	32	38321	h	h	a	h	h	b	h	b	a	h	h	a	h	a	h	h	h	b	b	a	a	b	h	h	h	b	h	h	h	h	h	h	h	a	b	b	h	h	b	h	a	h	h	h	a	a	a
LG21	33	10638	h	h	a	h	h	b	h	b	a	h	h	a	h	a	h	h	h	b	b	a	a	b	h	h	h	b	a	h	h	h	h	h	h	a	b	b	h	h	b	h	a	h	h	h	a	a	a
LG21	34	5428	h	h	a	h	h	h	h	b	a	h	h	a	h	a	h	h	h	b	b	a	a	b	h	h	h	b	a	h	h	h	h	h	h	a	b	b	h	h	b	h	a	h	h	h	a	a	a
LG21	35	125	h	h	a	h	h	h	h	b	a	h	h	a	h	a	h	h	h	b	b	h	a	b	h	h	h	b	a	h	h	h	h	h	h	a	b	b	h	h	b	h	a	h	h	h	a	a	a
LG21	36	1447	h	h	a	h	h	h	h	b	a	h	h	a	h	a	h	h	h	b	b	h	a	b	h	h	a	b	a	h	h	h	h	h	h	a	b	b	h	h	b	h	a	h	h	h	a	a	a
LG21	37	14283	h	h	a	h	h	h	h	b	a	h	h	a	h	a	h	h	h	b	b	h	a	b	h	h	a	b	a	h	b	h	h	h	h	a	b	b	h	h	b	h	a	h	h	h	a	a	a
LG21	38	4969	h	h	a	h	h	h	h	b	a	h	h	h	h	a	h	h	h	b	b	h	a	b	h	h	a	b	a	h	b	h	h	h	h	a	b	b	h	h	b	b	a	h	h	h	a	h	a
LG21	39	26143	h	h	a	h	h	h	h	b	a	h	h	h	h	a	h	h	h	b	b	h	a	b	h	h	a	h	a	b	b	h	h	h	h	a	b	b	h	h	b	b	a	h	h	h	a	h	a
LG21	40	7658	h	h	a	b	h	h	h	b	a	h	h	h	h	a	h	h	h	b	b	h	a	b	h	h	a	h	a	b	b	h	h	h	h	a	b	b	h	h	b	b	a	h	h	h	a	h	a
LG21	41	22087	h	h	a	b	h	h	h	h	a	h	h	h	h	h	h	h	h	h	h	h	a	b	h	h	a	h	a	b	b	h	h	h	h	a	b	b	h	b	b	b	a	h	h	h	a	h	a
LG21	42	12764	h	h	a	b	h	h	a	h	a	h	h	h	h	h	h	h	h	h	h	h	a	h	h	h	a	h	a	b	b	h	h	h	h	a	b	b	h	b	b	b	a	h	h	h	a	h	a
LG21	43	3645	h	h	a	b	h	h	h	h	a	h	h	h	h	h	h	h	h	h	h	h	a	h	h	h	a	h	a	b	b	h	h	h	h	a	b	b	h	b	b	b	a	h	h	h	a	h	a
LG21	44	13133	h	h	h	b	h	h	h	h	a	h	h	h	h	h	h	h	h	h	h	h	a	h	h	h	a	h	a	b	b	h	h	h	h	a	b	b	h	b	b	b	a	h	h	h	a	h	a
		total recombination events per LG	0	0	2	2	2	1	3	1	1	2	1	1	0	1	2	1	1	2	1	2	0	1	0	1	2	1	2	2	1	0	1	2	2	0	2	0	1	1	0	2	1	2	1	1	0	1	2
			10_F2	16_F2	17_F2	18_F2	20_F2	37_F2	38_F2	39_F2	40_F2	41_F2	42_F2	43_F2	44_F2	46_F2	47_F2	48_F2	49_F2	50_F2	52_F2	53_F2	54_F2	55_F2	56_F2	57_F2	58_F2	59_F2	60_F2	61_F2	62_F2	63_F2	64_F2	67_F2	68_F2	69_F2	6_F2	71_F2	72_F2	73_F2	74_F2	75_F2	76_F2	78_F2	79_F2	80_F2	81_F2	85_F2	86_F2
LG22	1	831	b	b	a	a	h	h	b	h	h	h	b	b	a	a	h	h	h	a	a	a	h	b	h	h	h	h	h	h	h	a	a	h	h	h	h	h	h	h	h	b	b	h	a	a	b	h	a
LG22	2	2667	b	b	a	a	h	h	b	h	h	h	b	b	a	a	h	h	h	a	a	a	h	b	h	h	h	h	h	h	h	a	a	h	h	h	b	h	h	h	h	b	b	h	a	a	b	h	a
LG22	3	5543	b	b	a	a	h	h	b	h	h	h	b	b	a	a	h	h	h	a	a	a	h	b	h	h	h	h	h	h	h	a	a	h	h	h	b	h	h	h	h	b	b	h	a	a	b	h	h
LG22	4	13664	b	b	a	a	h	h	b	h	h	h	b	b	a	a	h	h	h	a	a	a	h	b	h	a	h	h	h	a	b	a	a	h	h	h	b	h	h	h	h	b	b	h	a	a	b	h	h
LG22	5	7386	b	b	a	a	h	h	b	h	h	h	b	b	a	a	h	h	h	a	a	a	h	b	h	a	h	h	h	a	b	a	a	h	a	h	b	h	h	h	h	b	b	h	a	a	b	h	h
LG22	6	10227	b	b	a	a	h	h	b	h	h	h	b	b	a	a	h	h	h	a	a	a	h	b	h	a	h	h	h	a	b	a	a	a	a	h	b	h	h	h	h	b	b	h	a	a	b	h	h
LG22	7	3075	b	b	a	a	h	h	b	h	h	h	b	b	h	a	h	h	h	a	a	a	h	b	h	a	h	h	h	a	b	a	a	a	a	h	b	h	h	h	h	b	b	h	a	a	b	h	h
LG22	8	5610	b	b	a	a	h	h	b	h	h	h	b	b	h	a	h	h	h	a	a	a	h	b	h	a	h	h	h	a	b	a	a	a	a	b	b	h	h	h	h	b	b	h	a	a	b	h	h
LG22	9	252	b	b	a	a	h	h	b	h	h	h	b	b	h	a	h	h	a	a	a	a	h	b	h	a	h	h	h	a	b	a	a	a	a	b	b	h	h	h	h	b	b	h	a	a	b	h	h
LG22	10	2114	b	b	a	a	h	h	b	h	h	h	b	b	h	a	h	h	a	a	a	a	h	b	h	a	h	h	h	a	b	a	a	a	a	b	b	h	h	h	h	b	b	h	a	a	h	h	h
LG22	11	12028	b	b	a	a	h	h	b	h	h	h	b	b	h	a	h	h	a	a	a	h	h	b	h	a	h	h	h	a	b	a	a	a	a	b	b	h	h	h	h	b	b	h	a	a	h	h	h
LG22	12	35491	b	b	a	a	h	a	h	h	h	h	b	b	h	h	h	h	a	a	a	h	h	b	h	a	h	h	h	a	b	a	a	a	h	b	b	h	h	h	h	b	h	h	a	a	h	h	h
LG22	13	789	b	b	a	a	h	a	h	h	h	h	b	b	h	h	h	h	a	a	a	h	h	b	h	a	h	h	h	a	b	a	a	a	h	b	b	h	h	a	h	b	h	h	a	a	h	h	h
LG22	14	137	b	b	a	a	h	a	h	h	h	h	b	b	h	h	h	h	a	a	a	h	h	b	h	a	h	h	h	a	b	a	a	a	h	b	b	h	h	a	h	b	h	h	a	h	h	h	h
LG22	15	950	b	b	a	h	h	a	h	h	h	h	b	b	h	h	h	h	a	a	a	h	h	b	h	a	h	h	h	a	b	a	a	a	h	b	b	h	h	a	h	b	h	h	a	h	h	h	h
LG22	16	19616	b	h	a	h	h	a	h	h	h	h	b	b	h	h	h	h	a	a	a	h	a	b	h	a	h	h	h	a	b	a	a	a	h	b	b	h	h	a	h	b	h	h	a	h	h	h	h
LG22	17	30122	b	h	a	h	a	a	h	h	h	h	b	b	h	h	h	h	a	a	a	h	a	b	h	a	h	h	h	a	b	a	a	a	h	b	b	h	h	a	h	b	h	h	a	h	h	h	h
LG22	18	46932	b	h	a	h	a	a	h	h	h	h	b	b	h	h	h	h	a	a	a	h	a	b	h	a	h	h	h	a	b	a	a	a	h	b	b	h	h	a	h	b	h	h	a	h	h	h	h
LG22	19	29784	b	h	a	h	a	a	h	h	h	h	b	b	h	h	h	h	a	a	a	h	a	b	h	a	h	h	h	a	b	h	a	a	h	b	b	b	h	a	h	b	h	h	a	h	h	h	h
LG22	20	2147	b	h	a	h	a	a	h	h	h	h	b	b	h	h	h	h	a	a	a	h	a	b	h	a	h	h	h	a	b	h	a	a	h	b	b	b	h	a	h	b	h	h	h	h	h	h	h
LG22	21	14058	b	h	a	b	a	a	h	h	h	h	b	b	h	h	h	h	a	a	a	h	a	b	h	a	h	h	h	a	b	h	a	a	h	b	b	b	h	a	h	b	h	h	h	h	h	h	h
LG22	22	1404	b	h	a	b	a	a	h	h	h	h	b	b	h	h	h	h	a	a	a	h	a	b	h	a	h	h	b	a	b	h	a	a	h	b	b	b	h	a	h	b	h	h	h	h	h	h	h
LG22	23	52359	b	h	a	b	a	a	h	h	h	h	b	b	h	h	h	h	a	a	a	h	a	b	h	a	h	h	b	a	b	h	h	a	h	b	b	b	h	a	h	b	h	h	h	h	h	a	h
LG22	24	7507	b	h	a	b	a	a	h	h	h	h	b	b	h	h	h	h	a	a	a	h	a	b	h	a	h	h	b	a	b	h	h	a	h	b	b	b	h	a	h	h	h	h	h	h	h	a	h
LG22	25	14676	b	h	a	b	a	a	h	a	h	h	b	b	h	h	h	h	a	a	a	h	a	b	h	a	h	h	b	a	b	h	h	a	h	b	b	b	h	a	h	h	h	h	b	b	h	a	h
LG22	26	62	b	h	a	b	a	a	h	a	a	h	b	b	h	h	h	h	a	a	a	h	a	b	h	a	h	h	b	a	b	h	h	a	h	b	b	b	h	a	h	h	h	h	b	b	h	a	h
LG22	27	775	b	h	a	b	a	a	h	a	a	b	b	b	h	h	h	h	a	a	a	h	a	b	h	a	h	h	b	a	b	h	h	a	h	b	b	b	h	a	h	h	h	h	b	b	h	a	h
LG22	28	14718	h	h	a	b	a	a	h	a	a	b	b	b	h	h	h	b	a	a	a	h	a	b	h	a	h	h	b	a	b	h	h	a	h	b	b	b	h	a	h	h	h	h	b	b	h	a	h
LG22	29	11517	h	h	a	b	a	a	h	a	a	b	b	b	h	h	h	b	a	a	a	h	a	b	h	a	h	h	b	a	b	h	h	a	h	b	b	b	h	a	h	h	h	h	b	b	a	a	h
LG22	30	5199	h	h	a	b	a	h	h	a	a	b	b	b	h	h	h	b	a	a	a	h	a	b	h	a	h	h	b	a	b	h	h	a	h	b	b	b	h	a	h	h	h	h	b	b	a	a	h
LG22	31	3064	h	h	a	b	a	h	h	a	a	b	b	b	h	h	h	b	a	a	h	h	a	b	h	a	h	h	b	a	b	h	h	a	h	b	b	b	h	a	h	h	h	h	b	b	a	a	h
LG22	32	2056	h	h	a	b	a	h	h	a	a	b	b	b	h	h	h	b	a	a	h	h	a	b	h	a	h	h	b	a	b	h	h	a	h	b	b	b	h	a	h	h	a	h	b	b	a	a	h
LG22	33	3756	h	h	a	b	a	h	h	a	a	b	b	b	h	h	h	b	a	a	h	h	a	b	h	a	h	h	b	h	b	h	h	a	h	b	b	b	h	a	h	h	a	h	b	b	a	a	h
LG22	34	2460	h	h	a	b	a	h	h	a	a	b	b	b	h	h	h	b	a	a	h	h	a	b	h	a	h	h	b	h	b	h	h	a	h	b	b	b	a	a	h	h	a	h	b	b	a	a	h
LG22	35	20756	h	h	a	b	a	h	h	a	a	b	b	b	h	h	h	b	a	a	h	h	a	b	h	h	h	h	b	h	b	h	h	a	h	b	b	b	a	a	h	h	a	h	b	b	a	a	h
LG22	36	14606	h	h	a	b	a	h	h	a	a	b	b	b	h	h	h	b	a	a	h	h	a	b	h	h	h	h	b	h	b	h	h	a	b	b	b	b	a	a	h	h	a	h	b	b	a	a	h
LG22	37	12769	h	h	a	b	a	h	h	a	a	b	b	b	h	h	h	b	a	a	h	h	a	b	h	h	h	h	b	h	b	h	h	a	b	b	b	b	a	h	h	h	a	h	b	b	a	a	h
LG22	38	3605	h	h	a	b	a	h	h	a	a	b	b	b	h	h	h	b	a	a	h	b	a	b	h	h	h	h	b	h	b	h	h	a	b	b	b	b	a	h	h	h	a	h	b	b	a	a	h
LG22	39	9149	h	h	a	b	a	h	h	a	a	b	b	b	h	h	h	b	a	a	h	b	a	b	h	h	h	h	b	h	b	h	h	a	b	b	h	b	a	h	h	h	a	h	b	b	a	a	h
LG22	40	7823	h	h	a	b	a	h	a	a	a	b	b	b	h	h	h	b	a	a	h	b	a	b	h	h	h	h	b	h	b	h	h	a	b	b	h	b	a	h	h	h	a	h	b	b	a	a	h
LG22	41	6537	h	h	a	b	a	h	a	a	a	b	b	b	h	h	h	b	a	a	h	b	a	b	h	h	h	h	b	h	b	h	h	a	b	b	h	b	a	h	b	h	a	h	b	b	a	a	h
		total recombination events per LG	1	1	0	2	1	2	2	1	1	1	0	0	1	1	0	1	1	0	1	2	1	0	0	2	0	0	1	2	1	1	1	1	3	1	2	1	1	2	1	1	2	0	2	2	2	1	1
			10_F2	16_F2	17_F2	18_F2	20_F2	37_F2	38_F2	39_F2	40_F2	41_F2	42_F2	43_F2	44_F2	46_F2	47_F2	48_F2	49_F2	50_F2	52_F2	53_F2	54_F2	55_F2	56_F2	57_F2	58_F2	59_F2	60_F2	61_F2	62_F2	63_F2	64_F2	67_F2	68_F2	69_F2	6_F2	71_F2	72_F2	73_F2	74_F2	75_F2	76_F2	78_F2	79_F2	80_F2	81_F2	85_F2	86_F2
LG23	1	437	h	h	h	h	a	h	b	h	h	h	h	b	a	h	h	a	a	a	h	h	b	a	h	b	h	a	b	h	b	b	h	b	b	h	h	h	h	b	h	b	h	b	a	a	b	a	h
LG23	2	5001	h	a	h	h	a	h	b	h	h	h	h	b	a	h	h	a	a	a	h	h	b	a	h	b	h	a	b	h	b	b	h	b	b	h	h	h	h	b	h	b	h	b	a	a	b	a	h
LG23	3	6042	h	a	h	h	a	h	b	h	h	h	h	b	a	h	h	a	a	a	h	h	b	a	h	b	h	a	b	h	b	b	h	b	b	h	h	h	h	b	h	b	h	b	a	a	b	a	h
LG23	4	1079	h	a	h	h	a	h	b	h	h	h	h	b	a	h	h	a	a	a	h	h	b	a	h	b	h	a	b	h	b	h	h	b	b	h	h	h	h	b	h	b	h	b	a	a	b	a	h
LG23	5	244	h	a	h	h	a	h	b	h	h	h	h	b	a	h	h	a	a	a	h	h	b	a	h	b	h	a	b	h	b	h	h	b	b	h	h	h	h	b	h	b	h	b	a	a	b	a	b
LG23	6	50259	h	a	h	h	a	h	b	h	h	h	h	b	a	h	h	a	a	a	b	h	b	a	h	b	h	a	b	h	b	h	h	b	b	h	h	h	h	b	h	b	h	b	a	a	b	a	b
LG23	7	12416	h	a	h	h	a	h	b	h	h	h	h	b	a	h	h	a	a	a	b	h	b	a	h	b	h	a	b	h	b	h	h	b	b	h	h	h	h	b	h	b	h	b	a	h	b	a	b
LG23	8	7274	h	a	h	h	a	h	b	h	h	h	h	b	a	h	h	a	a	a	b	h	b	a	h	b	h	a	b	h	b	h	h	b	b	h	h	h	h	b	h	b	h	b	a	h	h	a	b
LG23	9	34924	h	a	h	h	a	h	b	h	h	h	h	b	a	b	h	h	a	a	b	h	b	a	h	b	h	a	b	h	b	h	h	b	b	a	h	h	h	b	h	b	h	b	h	h	a	a	b
LG23	10	12111	h	a	h	h	a	h	b	h	h	h	h	b	h	b	h	h	a	a	b	h	b	a	h	b	h	a	b	h	b	h	h	b	b	a	h	h	h	b	h	b	h	b	h	h	a	a	b
LG23	11	2643	h	a	h	h	a	h	b	h	h	h	h	b	h	b	h	h	a	a	b	h	h	a	h	b	h	a	b	h	b	h	h	b	b	a	h	h	h	b	h	b	h	b	h	h	a	a	b
LG23	12	19970	h	a	h	h	a	h	b	h	h	h	h	b	h	b	h	h	a	a	b	h	h	a	h	b	h	a	b	h	b	h	h	b	b	a	h	h	h	b	h	b	h	b	h	h	a	h	b
LG23	13	2883	h	a	h	h	a	h	b	h	h	h	h	b	h	b	h	h	a	a	b	h	h	a	h	b	h	a	b	h	b	h	h	h	b	a	h	h	h	b	h	b	h	b	h	h	a	h	b
LG23	14	23306	h	a	h	b	a	a	b	h	h	h	h	b	h	b	h	h	a	a	b	h	h	a	h	b	h	a	b	h	b	h	h	h	b	a	h	h	h	b	h	b	h	b	h	h	a	h	b
LG23	15	25214	h	a	h	b	a	a	b	h	h	h	h	b	h	b	h	h	a	a	b	h	h	a	h	b	h	a	b	b	b	h	h	h	b	a	h	h	h	b	h	b	h	b	h	h	a	h	b
LG23	16	515	h	a	h	b	a	a	b	h	h	h	h	b	h	h	h	h	a	a	b	h	h	a	h	b	h	a	b	b	b	h	h	h	b	a	h	h	h	b	h	b	h	b	h	h	a	h	b
LG23	17	38209	h	a	h	b	a	a	b	h	h	h	h	b	h	h	h	h	a	a	b	h	a	a	h	b	h	a	b	b	b	h	h	h	b	a	h	h	h	b	h	b	h	b	h	h	a	h	b
LG23	18	2731	h	a	h	b	a	a	b	h	h	h	h	b	h	h	h	h	a	a	b	h	a	a	h	b	h	a	b	b	b	h	h	h	b	a	a	h	h	b	h	b	h	b	h	h	a	h	b
LG23	19	27703	a	a	h	b	a	a	b	h	h	h	h	b	h	h	h	h	a	a	b	h	a	a	h	b	h	a	b	b	b	h	h	h	b	a	a	h	h	b	h	b	h	b	h	h	a	h	b
LG23	20	42581	a	a	h	b	a	a	b	h	h	h	h	b	h	h	h	h	a	a	b	h	a	a	h	b	h	a	b	b	h	h	h	h	b	a	a	h	h	b	h	b	h	b	h	h	a	h	b
LG23	21	6944	a	a	h	b	a	a	b	h	h	h	h	h	h	h	h	h	a	a	h	b	a	a	h	h	h	a	b	b	h	h	h	h	h	a	a	h	b	b	h	h	h	h	h	h	a	h	b
LG23	22	7035	a	a	h	b	a	a	b	h	h	h	h	h	h	h	a	h	-	a	h	b	a	a	-	h	h	a	b	b	h	h	h	h	h	a	a	h	b	b	h	-	h	h	h	h	a	h	b
LG23	23	199	a	a	h	b	a	a	b	h	h	h	h	h	h	h	a	h	a	a	h	b	a	a	h	h	h	a	h	b	h	h	h	h	h	a	a	h	b	b	h	h	h	h	h	h	a	h	b
LG23	24	20636	a	a	b	b	a	a	b	h	h	h	h	h	h	h	a	h	a	a	h	b	a	a	h	h	h	a	h	b	h	h	h	h	h	a	a	h	b	b	h	h	h	h	h	h	a	h	b
LG23	25	11063	a	a	b	b	a	a	b	h	h	h	h	h	h	h	a	h	a	a	h	b	a	a	h	h	h	a	h	b	h	h	h	h	h	a	a	h	b	b	h	h	h	h	h	h	a	h	b
LG23	26	14333	a	a	b	b	a	a	b	h	h	h	h	h	h	h	a	h	a	a	h	b	a	a	a	h	h	a	h	h	h	h	h	h	h	a	a	h	b	b	h	h	h	h	h	h	a	h	b
LG23	27	7841	a	a	b	b	a	a	b	h	h	b	h	h	h	h	a	h	a	a	h	b	a	a	a	h	h	a	h	h	h	h	h	h	h	a	a	h	b	b	h	h	h	h	b	h	a	h	b
LG23	28	30901	a	a	b	b	a	a	b	h	h	b	h	h	h	h	a	h	a	a	h	b	a	h	a	h	h	a	h	h	h	h	h	h	h	a	a	h	b	b	h	h	h	h	b	h	a	h	b
LG23	29	19927	h	a	b	b	a	a	b	h	h	b	h	h	h	h	a	h	a	a	h	b	a	h	a	h	h	a	h	h	h	h	h	b	h	a	a	h	b	b	h	h	h	h	b	h	a	h	b
LG23	30	7561	h	a	b	b	a	a	b	h	h	b	h	h	h	h	a	h	a	a	h	b	a	h	a	h	h	a	h	h	h	h	h	b	h	a	a	h	b	b	h	h	h	h	b	h	a	b	b
LG23	31	16901	h	a	b	b	a	a	b	h	h	b	h	h	h	h	a	h	a	a	h	b	a	h	a	h	b	a	h	h	h	h	h	b	h	a	a	h	b	b	h	h	h	h	b	h	a	b	b
LG23	32	42055	h	a	b	b	a	a	b	h	h	b	h	h	h	h	a	h	a	a	h	b	a	h	a	h	b	a	h	h	h	h	h	b	h	a	a	h	b	b	b	h	h	h	b	h	a	b	b
LG23	33	11817	h	a	b	b	a	a	b	h	h	b	h	h	h	a	a	h	a	a	h	b	a	h	a	h	b	a	h	h	h	h	h	b	h	a	a	h	b	b	b	h	h	h	b	h	a	b	b
LG23	34	3116	h	a	b	b	a	a	b	h	h	b	h	h	h	a	a	h	a	a	h	b	a	h	a	a	b	a	a	h	h	h	h	h	h	a	a	h	b	b	b	h	h	h	b	h	a	b	b
LG23	35	1323	h	a	b	b	a	a	b	h	h	b	h	h	h	a	a	h	h	a	h	b	a	h	a	a	b	a	a	h	h	h	h	h	h	a	a	h	b	b	b	h	h	a	b	h	a	b	b
LG23	36	20979	h	a	b	b	a	a	b	h	h	b	h	h	h	a	h	h	h	a	h	b	a	h	a	a	b	a	a	h	h	h	h	h	h	a	a	a	b	b	b	h	h	a	b	h	a	b	b
LG23	37	10613	h	a	b	b	a	a	b	h	h	b	h	h	h	a	h	h	h	a	h	b	a	h	a	a	b	a	a	h	h	a	h	h	h	a	a	a	b	b	b	h	h	a	b	h	a	b	b
LG23	38	22386	h	a	b	b	a	a	b	h	h	b	h	h	h	a	h	h	h	a	h	b	a	h	a	a	b	a	a	h	h	a	h	h	h	a	a	a	b	h	b	h	h	a	b	h	a	b	b
LG23	39	2432	h	a	b	b	a	a	b	h	h	b	h	h	h	a	h	b	h	a	h	b	a	h	a	a	b	a	a	h	h	a	h	h	h	a	a	a	b	h	b	h	h	a	b	h	a	b	b
		total recombination events per LG	2	1	1	1	0	1	0	0	0	1	0	1	1	3	2	2	1	0	2	1	2	1	1	2	1	0	2	2	1	2	0	3	1	1	1	1	1	1	1	1	0	2	2	1	2	2	1
			10_F2	16_F2	17_F2	18_F2	20_F2	37_F2	38_F2	39_F2	40_F2	41_F2	42_F2	43_F2	44_F2	46_F2	47_F2	48_F2	49_F2	50_F2	52_F2	53_F2	54_F2	55_F2	56_F2	57_F2	58_F2	59_F2	60_F2	61_F2	62_F2	63_F2	64_F2	67_F2	68_F2	69_F2	6_F2	71_F2	72_F2	73_F2	74_F2	75_F2	76_F2	78_F2	79_F2	80_F2	81_F2	85_F2	86_F2
LG24	1	63	h	b	h	h	b	a	h	a	b	a	h	h	a	h	a	h	h	a	a	h	b	a	a	a	b	a	b	h	a	b	a	a	b	h	h	a	b	h	h	h	a	h	b	h	a	b	h
LG24	2	12246	h	b	h	h	b	a	h	a	b	a	h	h	a	h	a	h	b	a	a	a	b	a	a	a	b	a	b	h	a	b	a	a	b	h	h	a	b	h	h	h	a	h	b	h	a	b	h
LG24	3	18025	h	b	h	h	b	a	h	a	b	h	h	h	a	h	a	h	b	a	a	a	b	a	a	a	b	a	b	h	a	b	a	a	b	h	h	a	b	h	h	h	a	h	b	h	a	b	h
LG24	4	32548	h	b	h	h	b	a	b	a	b	h	h	h	a	h	a	h	b	a	a	a	b	a	a	a	b	a	b	h	a	b	a	a	b	h	h	a	b	h	h	h	a	h	b	h	a	b	h
LG24	5	22443	h	b	h	h	b	a	b	a	b	h	h	h	a	h	a	b	b	a	a	a	b	a	a	a	b	a	b	h	a	b	a	a	b	h	h	a	b	h	h	h	a	h	b	h	a	b	h
LG24	6	3617	h	b	h	h	b	a	b	a	b	h	h	h	a	h	a	b	b	a	a	a	b	a	a	a	b	a	b	h	a	b	a	a	b	h	h	a	b	b	h	h	a	h	b	h	a	b	h
LG24	7	32661	h	b	h	h	b	h	b	a	b	h	h	h	a	h	a	b	b	a	a	a	b	a	a	a	b	a	b	h	a	b	a	a	b	h	h	a	b	b	h	h	a	h	b	h	a	b	h
LG24	8	12972	h	b	h	h	b	h	b	a	b	h	h	h	a	h	a	b	b	a	a	a	b	a	a	a	b	a	b	h	a	b	a	a	b	b	h	a	b	b	h	h	a	h	b	h	a	b	h
LG24	9	37283	a	b	h	h	b	h	b	a	b	h	h	h	a	h	a	b	b	a	a	a	b	a	a	a	b	a	b	h	a	b	a	a	b	b	h	a	b	b	h	h	a	h	b	h	a	b	h
LG24	10	21489	a	b	h	h	b	h	b	h	b	h	h	h	a	h	a	b	b	a	a	a	h	a	a	a	h	a	b	h	a	b	a	a	b	b	h	a	b	b	h	h	a	h	b	h	a	b	h
LG24	11	37337	a	b	h	h	h	h	b	h	b	h	h	h	a	h	a	b	b	a	a	a	h	a	a	a	h	a	b	h	a	b	a	a	b	b	h	a	b	b	h	h	a	h	b	h	a	b	h
LG24	12	6067	a	b	h	h	h	h	b	h	b	h	h	h	a	h	a	b	b	h	a	a	h	a	a	a	h	a	b	h	a	b	a	a	b	b	h	a	b	b	h	h	a	h	b	h	a	b	h
LG24	13	865	a	b	h	h	h	h	b	h	b	h	h	h	a	h	a	b	h	h	a	a	h	a	a	a	h	a	b	h	a	b	a	a	b	b	h	a	b	b	h	h	a	h	b	h	a	b	h
LG24	14	320	a	b	h	h	h	h	b	h	b	h	h	h	a	h	a	b	h	h	a	a	h	a	a	a	h	a	b	h	h	b	a	a	b	b	h	a	b	b	h	h	a	h	b	h	a	b	h
LG24	15	4897	a	b	h	h	h	h	b	h	b	h	h	h	a	h	a	b	h	h	a	a	h	a	h	a	h	a	b	h	h	b	a	a	b	b	h	a	b	b	h	h	a	h	b	h	a	b	h
LG24	16	4238	a	b	h	h	h	h	b	h	b	h	h	h	a	b	a	b	h	h	a	a	h	a	h	a	h	a	b	h	h	b	a	a	b	b	h	a	b	b	h	h	a	h	b	h	a	b	h
LG24	17	12453	a	b	h	h	h	h	b	h	b	h	h	h	a	b	a	b	h	h	a	a	h	a	h	a	h	a	b	h	h	b	a	a	b	b	h	a	b	b	h	h	h	h	b	h	a	b	h
LG24	18	37904	a	b	h	h	h	h	h	h	b	h	h	h	a	b	a	b	h	h	a	a	h	a	h	a	h	a	b	h	h	b	a	a	b	b	h	a	b	b	h	h	h	h	b	h	a	b	h
LG24	19	898	a	h	h	h	h	h	h	h	b	h	h	h	a	b	a	b	h	h	a	a	h	a	h	a	h	a	b	h	h	b	a	a	b	b	h	a	b	b	h	h	h	h	b	h	a	b	h
LG24	20	1857	a	h	h	h	h	h	h	h	b	h	h	h	a	b	a	b	h	h	a	a	h	a	h	a	h	a	b	h	h	b	a	a	b	b	h	a	b	b	h	h	h	h	b	h	h	b	h
LG24	21	54806	a	h	h	h	h	h	h	h	b	h	h	h	a	b	a	b	h	h	a	a	h	a	h	a	h	a	b	h	h	b	a	a	b	b	h	a	b	b	h	h	h	h	b	b	h	b	h
LG24	22	37521	a	h	h	h	h	h	h	h	b	h	h	h	a	b	a	b	h	h	a	a	h	a	h	a	h	a	b	h	h	b	a	a	b	b	h	a	h	b	h	h	h	h	b	b	h	b	h
LG24	23	7681	a	h	h	h	h	h	h	h	b	h	h	h	a	b	a	b	h	h	a	a	h	a	h	a	h	a	b	h	h	b	h	a	b	b	h	a	h	b	h	h	h	h	b	b	h	b	h
LG24	24	17256	a	h	h	h	h	h	h	h	b	h	h	h	a	b	a	b	h	h	a	a	h	a	h	a	h	a	b	h	h	b	h	a	b	b	h	a	h	b	h	h	h	h	b	b	h	b	a
LG24	25	24107	a	h	h	h	h	b	h	h	b	h	h	h	a	b	a	b	h	h	a	a	h	a	h	a	h	a	b	h	h	b	h	a	b	b	h	a	h	b	h	h	h	h	b	b	h	b	a
LG24	26	2746	a	h	h	h	h	b	h	h	b	h	h	h	a	b	a	b	h	h	a	a	h	a	h	a	h	a	b	h	h	b	h	a	b	b	h	a	h	b	h	h	h	h	b	b	b	b	a
LG24	27	5830	a	h	h	h	h	b	h	h	b	h	h	h	h	b	a	b	h	h	a	a	h	a	h	a	h	a	b	h	h	b	h	a	b	b	h	a	h	b	h	h	h	h	b	b	b	b	a
LG24	28	9990	a	h	h	h	h	b	h	h	b	h	h	h	h	b	a	b	h	h	a	a	h	a	h	a	h	a	b	h	h	h	h	a	b	b	h	a	h	b	h	h	h	h	b	b	b	b	a
LG24	29	21063	a	h	h	h	h	b	h	h	b	h	b	h	h	b	a	b	h	h	a	a	h	a	h	a	h	a	b	h	h	h	h	a	b	b	h	a	h	b	h	h	h	h	b	b	b	b	a
LG24	30	19745	a	h	h	h	h	b	h	h	b	h	b	h	h	b	a	b	h	h	a	a	a	a	h	a	h	a	b	h	h	h	h	a	b	b	h	a	h	b	h	h	h	h	b	b	b	b	a
LG24	31	45521	a	h	h	h	h	b	h	h	b	h	b	h	h	b	a	b	h	h	a	a	a	a	h	a	h	a	b	h	h	h	h	a	b	b	h	a	h	b	h	h	h	h	h	b	b	b	a
LG24	32	10796	a	h	b	h	h	b	h	h	b	h	b	h	h	b	a	b	h	h	a	a	a	a	h	a	h	a	b	h	h	h	h	a	b	b	h	a	h	b	h	h	h	h	h	b	b	b	a
LG24	33	38	a	h	b	h	h	b	h	h	h	h	b	h	h	b	a	b	h	h	a	a	a	a	h	a	h	a	b	h	h	h	h	a	b	b	h	a	h	b	h	h	h	h	h	b	b	b	a
LG24	34	12961	a	h	b	h	h	b	h	h	h	h	b	h	b	b	a	b	h	h	a	h	a	a	h	a	h	a	b	h	h	h	h	a	b	b	h	a	h	b	h	h	h	h	h	b	b	b	a
LG24	35	1528	a	h	b	h	h	b	h	h	h	h	b	h	b	b	h	b	h	h	a	h	a	a	h	a	h	a	b	h	h	h	h	a	b	b	h	a	h	b	h	h	h	h	h	b	b	b	a
LG24	36	12553	a	h	b	h	h	b	h	h	h	b	b	h	b	b	h	b	h	h	a	h	a	a	h	a	h	a	b	h	h	h	h	a	b	b	h	a	h	b	h	h	h	h	h	b	b	b	a
LG24	37	18749	a	h	b	a	h	b	h	h	h	b	b	h	b	b	h	b	h	h	a	h	a	a	h	a	h	a	b	h	h	h	h	a	b	b	h	a	h	b	h	h	h	h	h	b	b	b	a
LG24	38	8852	a	h	b	a	h	b	h	h	h	b	b	h	b	b	h	b	h	h	a	h	a	a	h	a	a	a	b	h	h	h	h	a	b	b	h	a	h	b	h	h	h	h	h	b	b	b	a
LG24	39	3812	a	h	b	a	h	b	h	h	h	b	b	h	b	b	h	b	h	b	a	h	a	a	h	a	a	a	b	h	h	h	h	h	b	b	h	a	h	b	h	h	h	h	h	b	b	b	a
		total recombination events per LG	1	1	1	1	1	2	2	1	1	2	1	0	2	1	1	1	2	2	0	2	2	0	1	0	2	0	0	0	1	1	1	1	0	1	0	0	1	1	0	0	1	0	1	1	2	0	1
LG24		29871	a	h	b	h	h	b	h	h	h	h	b	h	h	b	h	b	h	h	a	h	a	a	h	a	h	a	b	h	h	h	h	a	b	b	h	a	h	b	h	h	h	h	h	b	b	b	a
[truncated: 122 more columns]
