# Supplementary material for: A Genetic Map for the Only Self-Fertilizing Vertebrate
Source: G3 (Bethesda). 2016 Feb 9;6(4):1095–106. doi: 10.1534/g3.115.022699 (PMC4825644; doi:10.1534/g3.115.022699)
Supplement: Supplemental Material [file supp_g3.115.022699_FileS2.xlsx]

## Sheet: marker.csv
marker	sequence
17	TGCAGGATCTGCCCCAGCCCATCGTGCCCAATGTAGTCCATGCTCAGATGATCCACACAGCTAAAGGTGGGATTCATCAAATGGATTCAGTGCTAA
18	TGCAGGCGGCGGCGCAGACTCGCTCTCAGACGGTTGGGCTTTCTGGGCCAGCACCTCTGTCTTCCCGCAGCCCTTCAGCGCCGCCCTCGCCTCTTG
19	TGCAGGAACTGAATGCGAGGAGAAGAACATTAACACAACTGCAGCGATACACTGTGTTTTCCTGCCCAGTTCCAATTTTGGAGGATTTAGATTTTT
28	TGCAGGTGGCGCTATGGGCGGACAGAGACACGTTTAATAAAACCAGACCTCCTGACCTCGTCTCCTCTCGTTGTTGGGACTTGAAGCCAGCAGGAC
38	TGCAGGTTGGTGGCCCTCCAGGACCAGGATTGGACTCTACTGGTGTATGGACATCAGTTTAATGAAAACAGCCAAAAATTTTCTGACCTTCTGCAG
46	TGCAGGATGGTGGCCCTCGAGGACCAGGATTGGACACCCCTGTGTTAAACCTTTAAATTATAAGAAGTGGTTTATTTTTTTACCTTGACTAAATTA
55	TGCAGGAGTGTCCTCCACTCCGTCTCCGTGTCTCCGAGGACCAGCTGAACTTCCTGTTTCTCGTGGTCTTTCAGCTCCTCCTGCTCACACAGATGG
58	TGCAGGGGCAACACGGTGGTGAAGATTTTAAACTGTCCCCTCGCAACAAGAAGGTCACATGTTCGCCTCCAGGATTGGGCCGTTCTGTGTAGAGTT
62	TGCAGGCTCTGTCAACGCTGCTGGAGTCTCCGTGTGCTAAAACACACATCGCAGAAGACCAGGTAACGCCCGCTAATCCCTGGAAGAAGATGATGT
63	TGCAGGCAGGAGAGGAAGGTTTCAGAACGTCACAACCAGTCTTCTGAAGGTTCAGTCATCCGAGCCTCACCTGCCCAGCCCAGGTAGCCCTGGATG
64	TGCAGGAGTTTTTGTTTGCTTGTTGACTTATCACCCAAAACTGACTTTCAAACAACTAAAATCAGATTTGAGATCAGTTTTTTTCCTTTTACTTGT
68	TGCAGGATAGTGGCCCTCCAGGACCAGGATTGGAGACCACTGGTTTAGTCCTTTCAGCTTCACGTCCACCTTTAATGAGTTTTTGGACAAATGATC
70	TGCAGGTCCTCATATTAAAATTCAGCACTGATGTTTGCCTTCGTAAAAGGCCTTTATTATTAAAGTGCCCTCACCTGCTAACGCCGCGGCCCATAA
71	TGCAGGTAATTACTCTCACCTAAAGATCTTTCTCTCAGCGAACGTGTGATGGACTCGCGCGTCCCTGCGAGTTTTAAGATCATTTTCAGCTCACTT
72	TGCAGGTGAGACAAAACAACAAAAACGTTCATGAAGGAGCATAAAGAGAAAGATTAGATTGTAAGAGAGGTTTGGTAAAATTTTAGGAGCAGACAA
89	TGCAGGAGAGATGCCACGCGCTGAAACTCTGTCCGGTTTCCCAAAACCTTCAGAGACAAAAGCACCGTTTCAGTTTCACCTCACTGTTGGAACGTT
90	TGCAGGACACAGGTGTTTAAGGAGACGAATTGAATACCTTTAACCTACTTTCAAATGTTATACTGATTTAGAGCAGGTGGGGGAACTTCACTGCAA
95	TGCAGGTTTGGAGAGGCTCCTCACGTCCAATGATCACCAAACAGGAAGCAGAAACACCAAAGTTTGACACGTTCAGCTGATTGTTCGAAGCCGTAA
106	TGCAGGGAGTACTGCAGCCCACAGAAAAGTTAGTAGAAACCTGGAAGAAATGTTGCTCCCTCTGAAGATTTCAGTCAACCAGGCTGAACACTGTCT
112	TGCAGGAACAGAACCGGGTTCATAACCAAGCCCAAACATAAACCTGACCCATGTGGTTCTGGAGCAGCAGGCTGGTCGGTTCTGGTTCTGACCCGC
118	TGCAGGGGGCAGCAACACACCACGGCTTGAGATGGGATTTAATCACCAAACATGCAGCCTATATTTGCATTTTTACAGAAAAAAAAGACTTCAGAT
120	TGCAGGCCTGTGGCTCCTACATGCATGCTTTGATGAAACTTCGGCGCAGGCCGAGCAGCAGACGCTCAGTAACTTTTTTTTTTTTTAAACGTCGTC
125	TGCAGGACTTGAGCGGTACTGCATGAAGTTCAAACAAATTAGAAGTTTGCAGTTGAATCTGAGGTGATTAGATAGGCAAGCCTTCCTGAAAACTTC
126	TGCAGGCTGCCGGATCCAGTGTGTTCTATAGGTGCTGACGGCATAAGAGACCTGACAGCCGATGCTCAGACTCTGACCTGGCTGCGTTGTCAGAGA
137	TGCAGGAGGGAGAGAAACCTTACATGTGCCACCACTGTGACAAGGGATTCAATCATTCCTCTTCCCTGTCGCGGCACCAAAGAGTCCACTCAGACG
145	TGCAGGCACAGACTTCCTGGTCAAGATGTTATGGATCTATGCGTTTGTTATATTTAAATTACTGCCTCTGTTCATTAATTATGTTGCATAGAATTA
147	TGCAGGGGCAGAAAAATCACAAACTGGGAGCAAAGTGAGAATCTGTGAGTCTGAGATCTGAGATCTGCTCCAAAATCAACAAAATCAGCCTGAGTG
149	TGCAGGGAGAGACTTTCAGAATCAGCCAGTGAAAGACAGTCTGTGTTTCTGAGAACCCACCATGACAGATACAGCTCGCTCACGGCCTCTGATCTT
153	TGCAGGAGAGCGGCCCCCAAGGAGCGGAGTCTGACACGTTCTGTAAGAACCACAAAGTACCTGAATTAATCCAATTTATTTTACATTACATCTGTA
162	TGCAGGGGAAAAAAAACATTTTTGAACACAGAGCTCCAGCAAGGCTCGTTTCATTAAAATTAAGTGGAAAATTGAACCAAGTTTTGAACTGTGTAA
170	TGCAGGCCACACAGTAGGATGAAACTATCAACTTTATGCTTTTTGTATTTCAAATTGCTTCCAGCCTCAAGTAACAAAGGTTTTTAAAGAGTAATG
175	TGCAGGACCAAAGAACCAACAGAGGAACACTGCTCTGAACAGCCTCACGTGTTCTCAGTGAAGCGGGGATGTTGTCTGGGCTCCCACCTGTAAACT
180	TGCAGGATCGTGGCCCTCGAGGACCAGGATTGGAGACCACTGGTTTAGGCCTTAAAAATAGTCCAGTATCAGCATGTGTGAGCTCCTGTTAGAGAC
181	TGCAGGCGTGCTGGGGTTACGCAACACTGCTCCTCCTTCCTTATGCAACTCCTGACCTTCGGCTGAGTAAACAGAAGCAGCTGCCGTCGTGCTGAC
186	TGCAGGGACTGTGTTCAAATTTCCCACAAGCGTTGCCCCCGCTGCTGCACCGAAGCCTCGTGGAACACAACTTCAGAGTCACCGAGAAGAGCTGAC
190	TGCAGGATGGTGGCCCTCCAGGACCAGGATTGGACAACCCTGGTTTACACAACAGTCAAAGAAATCAGACAAGAAAAATCTTTAAATTATTTTTGC
192	TGCAGGCATCATCAGGATTTTAGCTGGATTCCTCATCAGATGTTTTGAATAAGGCCCGAGGGTGGTAGGAGTTTAAAAAACACTATTTTATGATGA
197	TGCAGGATGGTGGCCCTCCAGGATCAGGATTACCTACCCCTGCATTAGATGTACATCTACAGCTGATATACTTATGAAACCAACCTGTTTTAAGAT
199	TGCAGGATGGTGGCTCTGAGGACCAGGATTGGACACCCCTGATCTACATGGACACACGACAGTTAAAAGTAGTGTCCTCTTCGTCCCCATATGACG
216	TGCAGGACGGTGGTCCTCCAGGACCAGGATTGGACACCACTGCTGTAGATGAATTTCAATGAAACTTTCAGAAAGCAAACTAATTGACTTCTGGAG
224	TGCAGGTTTTACTTGATTCTCTGCTCACCTGGTTTGAATCAATGGCTGATTAACAGGCTTCTGCAGAACATGAAGAGGTGATTTAACCATGAAGCA
228	TGCAGGGGCTCAGCGTGGACGAGGTGCAGATGTGCCTCGAAGCTGAGGCGACGGCAAGCTACAGAGCCACGATAACGACTCAGACCAAACACTGCA
229	TGCAGGTTTGCTAGAGACAATTGTTTAGGTTGCTGCTTTTTTCTCAATCAGACAATGTTTGTGTTTGGCTAACTGCATGCACTGATCAGGTGAGTC
230	TGCAGGTCCAGAGTCTACACAGCTGACCTGGAGTCAGCGCTCCACTACCTGCTGAGGGTCGAGCTCGCCGCCCACACCACGCTGCAGGGGGAGGAG
234	TGCAGGCTGGTGACATCTGCTCGCCATCTTCCCACCACATGCACGGCTCCTAATCAAAGCTCTAACCTTTTTCAGCTGTTGTCTTTTGGCACCAAA
244	TGCAGGATAATGGCCCTCCAGGACCAGGATTGGACACAGTTTTGCAGCCGCTCCATCCCTGCAAGGTTGTGATTGGTTTAAAGAAATGCAAATTTC
252	TGCAGGCGTGGCAGGATTTACTTACGTACTGCTGATTCGCGCATGCGCAGAAACAACGTACTGCTGTCGAGGAGTGATTCATTTGCGTCGTACAGT
255	TGCAGGCCGACAGACAATCAGAGGTGGATTTCAGTTTGGAGCTAATTTAATGTTTCGGCCTGAAAGGATAAAACTCAACCGTGAGCGTACCTTCCT
258	TGCAGGGCGCACCCCGCTGTGTCGTTTGAATTCACGTCATGAGTGAGTCAAAGAACGAGGAAGTTCCACTCCTGCTGAACTCAGCTAAACTAAGTT
259	TGCAGGTGGAGACCATCGGCGACGCCTACATGGTCGTCTCCGGCCTGCCGGTGCGGAATGGCAAGCTCCACGCCCGGGAGATCGCCGGGATGTCCC
263	TGCAGGATGTCTGTGGAGTTCTTGTCGGGCCCGTTTCAGTCCTCGGACTCTTCTCAGTGTTCGGGTCCAACTGCTCCAGTTTGGACGTAGATCCAG
267	TGCAGGACAGTGACCCCCGAGACAAACCTTCACCGTCTACAGAAACATGCAACCAGACTGACTGCGAGATCCAAAACCACAACGGTTCTGGACCAG
279	TGCAGGACTGCTGCAGCCGGGAGCAGGTGAGGCAGGCCGAGCAGCAGATGCAGGGACTGCAGGCGGCAGTCGGAATCCCGCTGCCCGAAGACTGAC
287	TGCAGGTTTTAGATGCTTTTAATTCTCCATCAGTGATGAAACCCTTTGGGTTCAGGTCCCACCTGGAGCAGGAGCTGAGGAGGGAGCGCAAGCAGA
295	TGCAGGTTGTTCCAGTATAGGTAGAGTTCTCTCAGATGGGAGGGGTTGGACTTCAGAGCTGAGCCCAGATAAGAACAGCTGATCTCTGACAAACTG
303	TGCAGGATAGAAGCCCTCCAGGACCAGGAGTGGACACCACGAGGTTAGAGGCACAGCTCTGGAGCTCGGCGTCTTGGTAGATTTGCAGCTGGGTCG
307	TGCAGGATAGTGGTCCTCCGGGACCAGGACTGGACACCCTCCACCCTGCAGCTGAGTGAACAGCGACACCCTGTGGTCAGTGTTGAACATGTTACT
315	TGCAGGTCATCATGGCCCACGGTTACTACAGTGTCAAGCTTCTCGGCAAGTTTCCTCATTATCAGGTTTAATTTGCTCCCCGCAAAATGCGCCGCG
320	TGCAGGTTGTGTTCAAGCTCCTGTAAAATGATCTAAACAAAACAATAATTGCCAGTATTTTAAAACACAATTTATTCTCCATAGCTGCACGCAACA
324	TGCAGGAGGAGATGGACAGACTGAGAGACGCTGTCCAGGGGCGGCAGGACGTCCTGAGTGGGACGGTTCAGGTCCACAAGGACAAAAACAAAAATC
329	TGCAGGTTTATTTTAAATCATCGTCCGGTGGTTCATGAGCTAACATTCTGGTGATAATTAACCATCGACCACTACTGAACAGCAAGAACAAATCTG
337	TGCAGGGAGGCAACGGCAGACCTGATGACTTTCTGACGCCACAGCGACAAAAACAAAAAATCACAGACAGATCGAAATACAAAGAGTTAACTCTGT
341	TGCAGGAGAGCAGTGAAAACTTCAACGCCATTTTTTCTTTTGTCCGAGTCAGTGACCCCGCTGCCGTTGTGACATGACGGCCGCTCGCCCACGCCT
346	TGCAGGATTGCTATGAAGCTGGTGCCTATATCCAGCTGTCATTGTGCGAGAGGCGGGGGACTGGTTGTAAGTCAATCACACTGTTGCATAACTCTT
351	TGCAGGAAGTGAACAGAACGTGCTACAGCTAGCTGCTGCTGCTATTTGAGCTTGCAGATACCCACAGTTTCATGGGAACAACCAAGTTGTTCGGAA
369	TGCAGGGTGGCGGAGGCGCTTTTGTGGCGCTCGAACCTTTTTATTTGACACAAGTTAATTAGACATGTTCGTCTCTTTCACCGCGGCCACCTTTCC
382	TGCAGGTTCATCCAGAGGGGTCAAAGGTCACTCAGAGACCTCTTTATTCCTCAAAAACAGAGAATTTGGACCAGAACACGATCAGAACCGGTTTGT
397	TGCAGGGCCTGGCGCTTGTGTCGCACTTTGCCTCCGCTGGGACGACCGCTGTACACGAGCAAGGACAAGGTGGGAATAAACACAAATAATTAGACA
401	TGCAGGTTCTTATCCTAGATCTTTTCACATCAGAAGTGAACTAAGTGTTGTTGATGGTCTTTTGTTTAAGCAAGACAGAATGGTTATTCATCAAGT
402	TGCAGGCCTTTTACAGCCTCTGCCAGTACCCAGTCATCCATGGTCCCATGTAGCATTGGACTTCGTCACAGGCCTGCCCCCGTCCCAAGGTAACAC
409	TGCAGGCTGGTTCAGAAGGCCGAGCTGACCCGCCTGTCCCAGACGTTCCTCCATGTCCCTCAGCTCCACTGGATCGTCGTGGAGGACTCGCCGCAC
417	TGCAGGATCATGGGATGAAACTGACGGAGGCGTCAGAAAGTTCATCAAACAGTTTCCTCGTGGTCTCAGCTCTGACTAGCCGTTAGCTCGTCAGTC
421	TGCAGGGCTCTCTGCCCCACACATCAAGGCCCTACAGTTGAGTTGTGTTTCATATGCTGGAGGATAGGGGATGTGACCCGCTCGCCGGGCAAGGGA
436	TGCAGGGTTTGAGGACAGAACTATGTTTCTGTTGCATAATTTCTTTTATTTAGCCTCTTGTTACTTTTAGCTTTTAACTTCTATGCTTCTAATTTG
437	TGCAGGGAGCAGACGAGAAGAATGGGCTGGTTCGACAGCCTGAAACCGCTCACTCCTGGCTGCAGGTCCAGCACTGGAAACAGGAAAGAATCAGAG
439	TGCAGGACCGACGGTCCCTGAAGGCCACTGCTGTAATGCACCGATGGTGCTTTCAAGGACAGATGGGAAAACCCAAATTCAGTGCATGCAGCTCGA
450	TGCAGGAAGTATAACACCTCAGAAATAGAACACTTCAGAACAATTAAATTAGATTCCTGCTCCCACACAAACTCTTGAATATGCGCCACTTGCAGT
457	TGCAGGTCAGAACAGCATGTGTCCGTCTGGAAACGAGGCCGGCATGATTCCCTCCAACAGATACCCCCAGCAGAGGTGGGCGGAGCTACAGCTCCT
458	TGCAGGACGGAGGTCCAGAGGACCAGGATCGCCTACTCCTGGTCTACAACATGAATCACTAACAAGCAGAACCAAAGAGGGGAAAAAACAAAAACA
459	TGCAGGCTCAGGTGAAATGGTTCTGCTCCTGAATAGAACCCTCTTATGGGGGAATTTTCCTGACATTAATCAATTAATGGCAGGAAAATTCCCCCA
460	TGCAGGACGAAGCTTCTCCTCTTTTCTACGACCAAATTGCACTTGACGAATCATGAAAATGGCTTCGCTGATGAAAGGCAGCTTTGAATAATCCCT
464	TGCAGGTATGTGCAGTAAGGGTCGGACAGCTTTACATTTCCTCCAGTTTTGACAGTATTTGTACAATAATGAGCAAAAATAACAATTTAACTGAAT
465	TGCAGGACCATCAGGTTTGAAACGAACTCGTGATTCTCACAACTTCACTCTGAATTTGCTGTTTCTGAAAATGGAAAGTTGGTCGCTTCTGCTGCT
470	TGCAGGTGGTGCTGTGCTAAAATGGTCCCTGGGAAACTAGTGTGAGCATAACTGGGGAAAGTTTCTATCTGGTGGAAAAGTAAGACAATATAAAAA
485	TGCAGGGAACTCTATATGTTTTTCGACAGAAAAATTCTGAGCCTAGGTGGATATGATGTGGGTGGAGGTAGACAACAACATAATGTGCACAGCCAA
486	TGCAGGTATGGTTTATGGTTTGTTTTGTCTCTCATCGCAATTCATCAAACTTTCCATTCCATTTAGGCTTCTTGCATAAAAGCAGAAAAGAAAAAC
493	TGCAGGGATAGAGAGGTTCACAGTGAAATAAAGGGCCCGCTAAACCAGCCTGCAAAGTCTTGCCCACTGGGCAACAAAAGTGTTATATTCAGAGGA
495	TGCAGGGGTCAGCACAGAAAGCAAACTTTGATGGATAGATTTTTGCAACTGTTTTACATGGATTGCCCTGAAACAATCTGGGCTGGAAGTCACAGC
509	TGCAGGACAGAGGACCAGCCGTAACGCCCCGCTGGTTGACTATGAGCACACACCGCCTCCATCAGAGCTGCTCGAAGACCTTTCAGCTGCTTCTTG
515	TGCAGGGAAACACCGAGAAAAGAGATCTGGAATAAACAAAGAGCGTTTTCAGCTTCGCGTTCATTTTGCCGTTTGTGCGTCCGTCCAGTCGGGATG
520	TGCAGGACACTGTCCTCTGACCCTCAGACAGGAGACAGTCTCAGGTAAACCCTCTAAGGTGACTCTAAACCCCTGTTGTTAGGCTCCGCCCCTTCT
522	TGCAGGTATAAATGCTGGTTGGGAAGATTCAGCTCCAGCAATTAGCCTGATCCACTGACTGCTCTGGCACCATGAATGTAAGTAAACTTCCCAAAG
525	TGCAGGTCCTCCACCTGTGGAAAACGTCAAACCACAACCTGGACCTGGCAAAGGGTCTGTCTCACAGTCTGAAGGTGCTGCGTAGCCAGGGGGCAC
526	TGCAGGCTTATTGTCTGAGGAACGAAGCTGTTGCACATTCTGGTGGTTCTTGATACGAAGGAATGGTTCCATCTTCCAGACGGCAGGAGGTTAAAC
527	TGCAGGCTCAGAGGTCCAATAAAAGGAGAGGAATAATGGTTCCGGATCCGTCTAATTCAAGTCAAAGCTCTGTTGTTTTCTTTTAGAGTGAGAATG
534	TGCAGGACCCGGCTTCTTTTATGCTTTCAGTTTCCCGTTTAAAGCAGAAAGTTTTATTATTATGAAGATGATGAATTTCAGCTCAGTGAGGAATAA
543	TGCAGGTTTTACTAGTTTCTCTGCTCCAACACACCTGATTTAAATTAATATGTGATTAACAGGCTTCTGCAGAACAAGAAGAGGTAATTTAACCAC
551	TGCAGGAGGGAAGAGGAGCGACTGTGATGAAGTTCAGCGACAGACGGTTAAACTCGACGTTTCACTGCTACTTAAATCTAAAAACAAAACCATCTC
555	TGCAGGTAAGAAACGTTTCTTTCTGCAGCGGCCGGGTTGTCAGCAGTGCAGATAGCATGTATACAGAACTTCGAACACAATCCCCGCTGCAAATTA
557	TGCAGGTTAATCAAGCCTTAGTACCAAGACCCCCTGTTCAATAACCTATTACATCGAGGGAGACCACTACAAGACAGTCACGTCCAGTCAGGTGAT
567	TGCAGGATAGTGACCCTCTAGGACCAGTACTGTTGGCGTTATCTTGTTTACAGTGGGTTGCATATAAATTCACCCCCCTGATATTCTACTTTGTTG
573	TGCAGGCATTACTGGATCGGGGACGGTCTCCATCTACCTTGAAGGTATATGCAGCCGCTATTTCCTGTTGGCATGTTGGGCTGAATGGTTGTTCGG
584	TGCAGGAGGAAGGAGAGAAATGTTTCCCATCTGACAAACAGAAGCAGTAAAGGGAACCATTTTTGGGAACATTCAGTTACCCTGTTATGCCTCATG
585	TGCAGGATGCCAAAACATTCCTCCGCTGAGCCCTCGCTCTTCGTCGAGAGTCTCAATCAGTTCTGGCACAGACACGTTGCACATATTGGAGTAGGC
594	TGCAGGAAAACGGCCGTCAGAGGCTGTGTGTGTGTGTGTGTGGACTTGTATTTGATACATTGTGGGGACAATTTTCCTAACATATACTACCTTGTG
602	TGCAGGAATGTGTGATTATGCAGGAAGAGGTATGATGAGGAGTTAACTGTGTATGTGTGTGCATGTGTACTATCATGGACGTATAAATGTGCACAT
603	TGCAGGATAGTGGCCCTCCAGGACCAGGATTGGACACCACTGCAGTAAACCTTTTTTTACAGTGTATCTGTGACGCTTTTAGACAAGAAGCGGTGC
605	TGCAGGTTAATAGCAGGTCTGAGCTGGACCTGAGTGTTTCTGTCCTGGATCTTCGTGGTTCCCTTTGTTATTTTCCCCATCCTGTGAGGACGTTCT
607	TGCAGGTTGAGCTGTAAGACTGAACCACTGGAGCACAACACGCACACATAGTTCTCGGCGATTAGTCACAAGTATTCTGAGGATGAACTCCGTACT
610	TGCAGGTATCCCACTTGGTTACACAAGTCTTGATTTATTCATTCAACTCCATGCCAGTAGACACACTCTCTGGCTCTCTGTAAACATCCATCCACA
615	TGCAGGATGTTGGGAATGGTCTGCCGCTCGTCTTCCTCGTGCTTCCTCTTCCTCCCGGAGATGTTGGGGCCCCTGAAGAGCAGATGAACGGGTTAA
621	TGCAGGGAGATTCGCCGCAACTCAGCCGGCTGCCTCAAGTTCCGCAACGAGTGCGAGAAGTGCAAAGAGATCCAGCATCTCGGTGAGGGAGCGGAC
623	TGCAGGCGGTGGAAACGCCGTTTCATGAAAATAGTGAGGGGTACGCTGTTTACTCAGGTACGGCAATATTTATGAGCGGCAATATTGAAATGACGA
669	TGCAGGATTTTGGCTGGTGGGAGGGGTTATGGGGGAGTGCTTCTTAACAAAAATCAGCCTTGAGTTAAAGCTCAACACAAGACCGTGGGTGGGCTG
707	TGCAGGGAGGCGGAGAAGGGGGGTTTCAAATGGACAAACATGTTGACATTGGAGTTTCTTCAAGGGACATTAACTCGTATTGATTCTCTCTTGATT
709	TGCAGGAAATCAATCAGCGCTCCTCGGCTTTAAGCCAGAACCTGTCTGTCCACCTGTCTGTGTGCCAGCGTTTAAGTCACTTGAAGGGCAACGGAG
717	TGCAGGTGGCAGCAGTGCTCGCGGCTTCAGAGGAAACTACAGCAGAGTGAGCGAGAAGCCGGACAGCGGCGACGGCAGCATCAGTCTGAACTGCGG
720	TGCAGGAACTTTCTGACGGTTTCTTGACTCTCCAGCTCCAGTCCGAACTCGTCTCTAAACGCCTGTCCTGTGTGTGTCTGCGTAGGGTGGAACAGC
726	TGCAGGGCTCCATGAACAGCGAGCGGACCTGAGCGCGCAGTGGAGGCGTTTATACTTGCCGCTTACGTGGGTGCAGTATTCTCTGAAAAGACAGGG
732	TGCAGGATTGACGGTTGCTCCTCTATGACTCGGACCAGAAGTTGGTCGATGTAGTCCTCGAGCTCGGTGATCTTGGCGTTCTTACTGGACAGGTCA
733	TGCAGGTTTAACCATGCAGGCTGATAAAATATTCAGTTTCAGATATTAGTTTGTAGGTGGATATTGTGTTTCTCAGCCAATTATCCAGACGTTTCC
734	TGCAGGACCAGTAGGACTGAACGGGTCGGTTCTGCTGGACTCTGAGCAGAAAGATTTCTGTCCTTCGTGAGGAATCATCTGTAACTTCAGAAATGA
736	TGCAGGTGTTTTCACAAAAATAAAAATGTCAGTTCAGGCTATTTAAGCTTGAGCAAACACAAAGGTAAACAGCTCAGTTACCACTGTGTCCTTTTT
749	TGCAGGAGAAAAGCCTCCCCACTGCCACCACCATGTTTCACAGTGGGGATGGTGAGTTCAGGGTGAGGTACAGTGTTTGGTTTAATCTGAGCAGAG
773	TGCAGGGTTCTGGTACCTGTAAGTACCTTATAAGTACCACAAATGTACATTTAGGGTGTTCTGTAAGTTCCAAGTACCCACTAAGTAAGCAGGTAC
774	TGCAGGGTTCTCGTCTCCTGAATTTAGCCTGACGTTTCCTTGGCAGTGGAAATGGAGGAACCGGTAAAAATATTTTTAGTCCTGGCAGCTCTCTGC
775	TGCAGGACACCTGTGTGCAGCACCTTATTATTCGTGCCATTTTTTTATTGTTTTTTTGATCTGTGGATGAATGAAAAGCCGCCGTTCTTTCAGATC
776	TGCAGGCTGGTTCTAGTACAAATTATAAGTCCCATAGTTGCTTCACGTTGTTCTTACCCTGCTGCTGTATGTCCAAATTTTTATTTTTATAACACG
780	TGCAGGGACACGCCTCACCCTGGTCCCGTCAGAACCAGCCGGTTCCGAAAACCCAACCAGCGCTCCCTGCAAAGGGAGGCTTCAAAAAAAAAAAAA
783	TGCAGGTAATTTACACCAGGATCACGCCGAGGAGGTCAGGTTCGTTGCTACCAACTGTGGGTGGTCAGCTCTGACACCTCTGTTCACACTCGGTGG
785	TGCAGGCAAGGCAGGATGTTGTGTTCCCTGACATTTGTTTGGCTTGCTCAAACACAACAGCACAATGCTTACTATAAAAGACAAGGATGTTACATA
789	TGCAGGTTAACACCGTCTGAAGAATCTCTGCTGCATCTTGAGCAGCCATCGTCATAAAAACGGCTGCTTTGCCTGCGGGCTAATTGGCCCAACGTT
797	TGCAGGATGGTGGCCCTGAGGACCAGGATTGGAGACCACTGCCCTAGAGGGTTTATCACAAACTCGCCTTTTTCTTCCTCAGAAGTGGAGTGGGGC
803	TGCAGGGGCCCGGTCGAGCAGCCTGCGGAGGAATAAGGGAGCAGATAAGTTGCCGCAGTTATCAGGGGAGATAAAGAAACAAAACAAAACAAAGAA
806	TGCAGGTCCGTATCTTCTTCTGCTTCTTTTTATTTGTACCTCGTCACTGTGAACCCAGACTGACCTTCCATCTGATTGTCTCACCTGCAGCGGTCC
807	TGCAGGTCTGGGGGAGCCGGAGGCTGTCCGTCCCGGAGACTCCTGAAACACAAAGCAGGTTAGTTAAAAAGAGAGAGAGAATTAAGAATTAAGATC
811	TGCAGGGTTCCCGATCCAGATTATCAGAATTCAGTTCATGTGGCTCAATATTTGCACATCTACTTCCAATTATCTCAAAGAAATCCAGTTCATCTG
820	TGCAGGGGTTCCGCCCTCTTTGCCGCCACTCTCCAGGAATTTGGTGAAGCCCTCCAGCGTCCTCTCTCCGTTGTAGTCGATCACCTGTTGATACAG
821	TGCAGGCCAGAAACAACCCGTCCACTTCGATTTCTGATGTTTCTGCTTAAAATAACGACGACGGCGCTCCTCTGAAGTCTATAAGTGCCTAAATGT
823	TGCAGGAGGGGTCATGCTATGGGTGACAGCTGAAGGTTGGGGGCCATGACACTCTGACCCCAGCTCACCAAAGCTGGCTCTTGGGACATGGAATGT
825	TGCAGGCCGTTCTCATGAGTTCTGATACAATCTGCACCAACTGAGTGACCTTTCTATGAACGGGCCTGAAATATGTTTGCTCTGTAACTGATAGGC
831	TGCAGGAGAGTGTCTGTGAAGAGGGAGGTCTGGGTCTCCATCCTGGACCTATTACCTCCTCGACTCGACCTCAGATCAGAAACTGGACAGATGGAT
835	TGCAGGACTGACCTATATTGCATTTCAAAGGAGAGGTGGTTGAGTTTTTCATCAGCACAGCGGGATTTAAGTGATTCCCCAGTGTGACCTCATCCC
836	TGCAGGTACAGGAAAGCAGCTTTTGTCTAATTGTTTTTGTGGGACTTTTGATTATCGACATCGGTATTATTTCACATCACGTCCACGTATCACGTG
841	TGCAGGTTGGAGGTCATTCTCAGGTACTGCCACACCAAATTTATAAAACTGACTGAGTTGGAGCCATGTTTTGTGGTAGCTACAGTTCATTGGCTG
846	TGCAGGTAGGACAGGTCCACGGTGGCGGCCGAATCCCTCACGCTCTGCCAGTACTCACCTGGGGGACGCAGAGGAGAGCGGGGAGGAAACAGGAGA
865	TGCAGGTTTTAGAGGTTTCTCTGCACCGATACGTCCAATTAAACGACCCTTAACAGGCTTCTGCTGAACTTGAAGAGATGCTGAGGACGTAATTCA
869	TGCAGGGCCAGTGGCCCCGAGAGGCGGAGGGCACCACGGCCGCCTGCGGCAACGACAAGGCCACGCAGGTAAACGCCAAACCCCGAGTCAGGACGT
878	TGCAGGATGGAGGCCCTGAGGACCAGGACTGGAGACCCCTGATATAGAGCGTAAAGAAAGCCTGATGTGTCAACACATCTGCTGATTTTAGGAGTT
881	TGCAGGCTCTGCAGGACTTCAGCTGGATCCGAGACCTGCTGGTCCTGGAGCTGCAGACTGCACCTGGACTTGGGCCTACAGGTGAAGTGCCCCTCT
882	TGCAGGCTGGTTCTTTGCCTCGATCTGAATTACCCTGTGACCCGTTTTATGAGCACGCTCAGCACATTTTTCTGCAGCTTTTACAACCTGCCTGCT
889	TGCAGGGATCAAACAAGCAGGAGTTAAAAGGTGCGACATGGTGTAGTGAGTTCAGACATGTATTGTAAAAAGACACTGCTTTGATTTATTGCTTCC
898	TGCAGGCAAGAACCAGGCTGTTGGCTCCACCGTGGACATGCCTCTGGATGCGACGGTCCCCGCTGACGTGCCTGAACCACAGATGTCCGTGCTGGT
899	TGCAGGCCTCATTAGTACAATGGATCAAAATAGCAAAAGAAAAAAAAACTATCTGGTCAGAAAAGTGTGACACTTTGAAAGACAGTGAAGAAAAAG
900	TGCAGGAAATGATGAAACGGTCAGTAAGCTCTGAAGATGCAGGTTTTAGGTTTGTAGATTCATGAAAGAACAGATTTTATTGGAGCAAAATCATCA
901	TGCAGGTTTGGCTCACAAAAAGAGCGTAGTAAACTCTCTCAGACCTAATCCCACCACTCCTTTTTTGATGGCACTCCCCCTGCCCTCCTCTCCTCT
910	TGCAGGCTGAACGGCAGGGTGACCCGATGGAAATGAATCTGAGTGATTGTTGTTTCACTCAGTTTTATTATTGCACAGGATTCGTATGTGTTTATG
918	TGCAGGTAATGTTTTCTCTGTTTATGTAGCTTCTGTGTCCTTAGGTAATACGTTTTTGTAAGTCAATTTGTTGTTGGTGCCATCTTGTTGATCTCT
920	TGCAGGAGTTGGACAGCTAGCCGGCTGTTGGACAGCTAGCCGGCTGTTGGACAGCTAGCCGGCTGTTGGACAATTAGCCGGCTGTTGGACAGCTAG
927	TGCAGGATGGTGGCTCTCCAGGACTAGGATTGGACACCCCCTGCTGTAAACAATCAGGCATTGATGAGGGCACCAATCCTGCTTCCCAACAGCTGC
936	TGCAGGTAATATGGTTTCCTTCTGTAATATTGAAACTCTCAGGTGTGTTGTTACACTTTGAAGTTTGACTTGCCAAATCAATTTCATTTTTTACTG
950	TGCAGGTAGAAAAGTCATAAAGAATGGATCCATAAGCATCGATTTTTTTCCACTGGACAGAAAGTAGTCTCTACCAGGAATTGTCCCCAGGAGGAT
973	TGCAGGAGCAGGCCGAGACCCGAGGCGTGAGGCCGAGCCGACCCTGGGAGCTCTTCACGGATCGCTCCGTGCGCTGGCAGCTCATCTCCGTCATCA
991	TGCAGGACCTTGACAACATATATTGCATCTGAAAAATCTTGATCGATTGTAAAGAGTTTGTACAAATCTAAAGAAATTAAAAGTCTCGCAAACAAT
993	TGCAGGCTGTGATGCGTTTCCTGTCGCGGTGAGTCAGGTCACCTATCACCTGCCTGGAAGTGTTACTGGGAGTCCTGCTGATTATAAATACGGACT
1026	TGCAGGCAGAACGCCAAGACGTCCTGAAACTGCGGACGAGCTGCGGGAAGGTTTGGGCCCTGAAATCTAAAACCAGAATGTTTCTATTTTTTTCTG
1028	TGCAGGCCTACATGCAGACCGTGCTCCAGCTCTGCCTCACCGTCACGCCGATGATCTTCTCTCTCAGCGTGTTCACCGTCATCACAGACAGCATGC
1032	TGCAGGTTTTACTTGTTCCTCTGCTCCAACACACCTGATTTAAATCAATGGGGGATTAACAGGCTTCTGAAGAACATGAAGAGCAGGGAAACAAGG
1050	TGCAGGATGGTGGCCCTCCAGGACCAGGATTGGACACCCCTGGTTTACATCCTTCATCGTCTCCTCTAACTTCCACCACAGGAAGCTCAGATGCTG
1052	TGCAGGAATCAGGGAAAAAGTACTCACAAATGCGGGCAGAGTTCCACCTCTGCCCCACTGTCAAGTCCACACGTTGTTTTCCCGCTAATCGCCGTC
1067	TGCAGGGCAGCAGAGTCATTTGCATGAAGATGCTGATTTCTTTGAATATTTCAGATGTGGAAAAAAACGGGGCTGCAGCCGCTTTACATGATGTGC
1072	TGCAGGATTGTTGATCTAAATCCAGACTAAAGCCACAGAATCGAGGTGAAACCAACACGATATCCAAACGTCATCGAATGCCTGCTTGGACCGCAG
1079	TGCAGGACGGCAGACCTGGAACAAGGATGTTAATCGCTCACTGGTCAACTTTGCAGATGCTTTAACGGTCCAAACCTTTCCAGAGGTGGACTTTTT
1085	TGCAGGATTTCACATCCAAGGTGCTTCATTTTGGACTCACCAAGAGAAGTGAAAAAAGGGTTCAGTTTGGTTGTATTGGACCACTAAAGACTGTAA
1086	TGCAGGTGTCAAAGATGTCTGATAGGAACCCAGTTACCATGCAAGGGTGACATATGATGAATTACAAGTTCTACTTTTAAGATATACCAAATACAT
1090	TGCAGGCAGTGGGTGATCCTGCAAGGCGTAAGCCATAGCAATCCAATTCACAACCTACTGTGAAAGCAGCTGCTTAGAAAGGGCCTGACCTTTCCG
1094	TGCAGGTGGTCTCACTGCACACCTGTACAGGTGAGCAGCTGCTTTCTTAAAGTACTTCCTGCTCAGTTCAAAGGTCGTTTCCTCAGCATCGTTCTT
1105	TGCAGGACTTCAGCTGCTCCGAAAATCACCAAGTTTGGTTTGTAAACATGAAGTCGTTCAGCTGAAAACTGAGAAGTTGTTTGGTTATTAATAGTT
1115	TGCAGGGCAGTTTTTTAATTTGTTTGTTTTTGTTTCGTGGGAGATAAGGAGGGATTTCTTTAGCCTGGCTGGAAAAAGCCTAAAACTCTTCTAAGA
1124	TGCAGGAGAGGCCTGCTGCTTCCGGCGAGGCCTCTGTGCGTAAAAGTCCCTTCACCCAGGGCCTGTGTTGGTTTAAACCCAGCAGGAGACGTTCAG
1129	TGCAGGTTCTTCCGGCAGATCGTGGAGGCGTTGCAGTTCGTCCACGCGCACGGCGTCGTGCACAGAGACATCAAAGACGAGAACATCGTGGTGGAC
1130	TGCAGGTTAATTAGGGTGTTTATGAACATTTCTTCTGCAGAAACATTCAACACATCTGGTCGGTCTGAAGCGACAGCTGCCGTGTTTAAATCTGTG
1135	TGCAGGACGGTCACACAGAGACACAGAGACACTCTGAACCTGCAGCCGGTCCGGTCCTGATCCAACAAGGAGCCAACCTGGACGTGTAATCAGCTC
1143	TGCAGGTTCTGCTCGGTTCTACCAGGCCGTAGTTTCTCTGTACAGAACGATCCCTACGTTCCGTTGCTGACTGACAGGTTTTAGATTTCTCTCCAG
1144	TGCAGGATGGTGGCCCTGAGGACCAGGATTGGACACCCCTGCTTTAAACTTTATGTAAATAATCCTCTCCATCAGTGTCACATCTGAACAGTGTTG
1158	TGCAGGTTTTTATTTTAAATGAAATTCGTGTTAGATTAATTTAGCTACCAGCCAATGAGTCAGTAATTTCACAAAGCACTTAGAGAAATGACTGAC
1188	TGCAGGGTTCTACTGTCTGTCTGGAATAATAAGATATCTGCTCAGGATGGGGGGAAAAGGAATTCGACATTTCAGCTGCTATGATAAACAAGGGCA
1189	TGCAGGAGGCGGAGTCTCAGCAGCTGAAGGCCAACATTGATCTGGGCTGTAACTTCTTTGTTCAGGCTAAAGTGTGAGTTGACCGGTGGGTGATAA
1192	TGCAGGCTGCAGAGGCCTGGCCACACAGCAGTGTCATCTCTGTGAGCCGCTCTCTGGCTAAAGTGTGAAGGAGGAAAGGCAAAATAAAAACTAGAC
1201	TGCAGGCAGCATGGCCGCCCTCAGCTTCTGTACTGTCGTACACAGAGTCAAGAATAAACGGAGAAACGAACAAAATGCAGCCACAGATCTGATCTG
1202	TGCAGGTGTAGTTCCTGCAGACGTCCTCATTAAAGGCCTGCCGTGCCTCGGAGAAATGCGTGTCGCCCGCCGCCTTTAACGCCTGCGTTTTACACT
1208	TGCAGGAGAAATTACACGGATCACATCACAAACCGGGGCAGGACTTTGATCATGACTTCAGCAGCTATCACCGTTATAACCCTTATGATATCTGAC
1212	TGCAGGCTTTTTTCTTTTTTGAATGACTTCCAGATTCCTCTTAATCATTAAACAGTTTACCCATTTAAAACTGACTTCAAGCCTTTGATGGAAAGC
1213	TGCAGGAAGAGTCTGTTTTTGTCTTAGGGACTGATAGAGCCAAAGGAGCAACAAATTCAGTCACTTGACAGCTTAAAACGCTTTTGAGGACCTTCA
1224	TGCAGGCATTGTTCATGTCTCTGGATACACAATTTTAAAAAACCTGATTGTGATAAAACAAATATACTGAACTTTTCTTTCTTTGTATGCGTTGAC
1225	TGCAGGAGGGCCATGCGTGCTGCGTTCAGGAACCGTCAGCGAGGAGCCGTCCTCACCACGCACTACATGGAGGAGGCCGAGGCCGTGTGCGACCGC
1230	TGCAGGTGCATGAAGGGAGCGAGACAGCGTGTCGCACAGAGGTGGAGTGTGTTTCGAAGATGTATATATGACAGCTTTACACTTCTCAAGATGTAT
1235	TGCAGGCCGTGAAGCCCAACATGGTTTACATGATGATGACAGAGGAAAGTCAGGATTAAATAAAATGCACGTTTATTACAACTGATACTGTCATTA
1252	TGCAGGACCGATCTCAGGGTCCGTCCCTGCAGAACGGTCAGGACTGAAACGTGGGTTTCCCTGTGATGAGGTCAGCATCAGTGTTGTGCTAACAGC
1274	TGCAGGTGTGGGACCTGATGGTTGCCAGTTCAAATATTCAGAGGCTCTGCAAACCGCTTTCAGTCAACATGTTGACTTTTGAAGGTTCTGGACTTG
1279	TGCAGGTTACAGATTTAGTAAAGAAATCACAAGAGGTTTTCCTCAGTTAATGAGTTTATAAGCTGACACGCTGTTTTGATGTTTTCTGCTGACGGG
1284	TGCAGGTGAGTGGGCCGGCGCCGCCTCCGTCGTCCTCAGAGCTGCGCAGCCGACCTGAACGCGTGCTTCTTGTCGCCGCAGCTGGCCCTGCTGGAG
1294	TGCAGGATGGTGGCCCTCCAGGACCAGGGTTGCCCACCCCTGCACTATAAAGTAGATTTCAACATGGAGAGCTTATCAACACACAAGCGTTCAGCT
1301	TGCAGGCGGCAGCGAGTGGGGGGTGTGAGTCGCAAATTCTGTTGCAATTTTACGCCACAGTAAGTATTATCCTACGCTCCATTAAAACGTCTGTGA
1305	TGCAGGTCAACATATTTGGAGGTAAATAAAGGAAATATACAGGAGACAAATAAGCAAAACAAAAACAACAACTGGTTTATTATTTGTTTCTTTACC
1308	TGCAGGATGGTGGCTTTGAGGACCAGGATTGGCCACCCCTGCCCTAAGGGGATGTAGCTGACAGGAAACATTAAAATAGTGATGCATCAGAAAACG
1319	TGCAGGCGGACATCTGCCTCCATCTGCACCGCAGCTTGCTACAGAACTGCAAAGCGTTTCGAGGCGCCAACAAGGGCTGCCTGCGAGCTCTGGCCG
1321	TGCAGGTCAGTGGAGTTCTCTTACAAAACAAGTTCTCAATATTTTCAGCATAAACAAAAACAACACATGTTTAAACACCAGCTTCTGTCTGATTTA
1323	TGCAGGGATTGCATAATGAGTTCTACCATCAGACAAAGAGCCGCGGCGGGGAGGCTGGAGTCCCTTTCAGCGCCAGAGACCGTTGTTTGTGAACAT
1324	TGCAGGAATATCAAAATATTTCTGCTGAAATAAGTATGTAATGCAAAACTGACAGCGGTGTGAAGGCTTATGAAACAGCGTTTGGATGAATTTCCA
1326	TGCAGGAAGCAGCTGTGTGAGAACATCACCGTGGCTTATTACTTCTGCGAGGAGCTGATTCCGTACCGGACCTCCGTCAGAGGACGGGTCGTTACT
1327	TGCAGGGCCATCGTTTCCAGCAGGCCGGGCCGTGGGAGTCTGACGGCCTCCGTTGGCTCTGCTGTTAGCTGCAGAGTCGCTCCACCGTCTCCCCTG
1330	TGCAGGAAGCCAACACATCCTCACACTGCAGTTATGCTGATATATGTTCTACTTTCCTCCATTTCTTTCATCACCGTTGCTCTTAACCTACTGGTC
1334	TGCAGGAGGGCTAGTGGTTCTCTGCTACCCCTATTCACTCTGGTTCTCCTCATACTTACTTCAAAAGAGTTTAAAAAGATAGAAATTTGACACATG
1337	TGCAGGAGCAGCCGAGTGTGAAGCGGTTGGGATGAGAGTCAGCTCCTCTAAGTCCGAGGCCATGGTTCTTAACAGGAAAGCACTGGAATGTTCCCT
1353	TGCAGGACGTGCTCCAGCTAGCTGCCGCCGCCTCTATTCACACACTTAAACAACCGAATAAATAGAATTTTAATTTTTGTGCGATGCAAAATCTCT
1359	TGCAGGTCTTACTGGGTTTGGCAGAAAGAGACTACAGAGCTGTTGACTTGAAAAACTGGGCCTTCTCTTCATTGGATAAAAGCCAGAGCAGATCTT
1361	TGCAGGATGGTGGCCCTCGAGGACCAGGATTGGAGACCACTGGTCTAAAGCAAGCTGTCAATGAAAACGGGTGGGTCTGCCCTTTTCAAACAACAC
1369	TGCAGGATGGTGGCCCTCCAGGACCAGGATTGGACACCCCTGATCTAAAACTTTGGCATAAATGGCGGCGGGTGACATGCATTCCTTCCCAGAATC
1378	TGCAGGAAGAGAACTGACAGAAAAATAAACAGTTTAACAGTGTGAGAATGTGACCTGATCCAGCATCAAACACTCACAGACATTAATACTTTAACA
1382	TGCAGGATAGTGGCCCTCCAGGGCCAGGATTGGACACCACTGACTTAAGGTTGTGTCTTATTGGGCTGTGACTGTGGGCGACTAGTTGACGACTCA
1387	TGCAGGAAGGCCCTACACAGTGTTGCAATTTGCACCTTTTGTAACTTGCCACTGTTTACGTAGCGCACTGCCCCCCGTCTTTTTGGAGAATACTGC
1389	TGCAGGAGGCGAAGTGGGCGGAGCTTTCAGATCCAGCAGGTAAGCCGACAGCGCGGCGGTCTGCAGCGTGTCGCTCAGCATCACGTGATCCTGAAG
1402	TGCAGGTGTCAGAATACAACTCTAGTGTTCTTGAGATGAGTTGGAGATGCCTACAAGCACAAGTTTTTTCAACATGTTCAAAACTCAAGCAACGGG
1404	TGCAGGTACAGAGCTTCGTTTTTGATAAGAAAATGATGAGAGGCTAAGATTCAGACATTTGTTTAAATATGGATCCATATTAGCTGGCAAGATTGT
1415	TGCAGGGCATTAATAATTAAGACATTTGCTTCTAGTTAATTGTTTTTGTGAACCCTTCTAAAGTGAAGACTATTTATGCTTTATTACGTATTTGTT
1419	TGCAGGAAGTGCTGTTGCTCAGGCTAGCCTCTAAACCCGTACTCGTTTCCGCCAAAAGATCAGTCAGCGGGAAGTTCTCTAGAGACACAAAAACAA
1427	TGCAGGAGCTTCTCTGCCACCTGCCGCCCATCCCGACCTCCACCCAGCTTCCCGTGGAACCAGTGCTCCGCGCAGTGCTGCTCGTTGTTGTTGCAC
1434	TGCAGGAGCTGAACGTTTTCATCTTCAGACGGTTGAAACAACAGAAGCAGAAGCAGTTCGACTGCAGAACGAGCTGAAAGTCAGAGGAGTAATAAA
1435	TGCAGGTTTCAGGTGTTTCTCTGCTCTGACACACCTGATTTGCATCAGTTATTAACAGAAGCTCTTGAAGTTCTGCTTGAAGAGCAGAGAAACGAC
1439	TGCAGGCTTGGCACCCTCTGTGTTTTCAGTCTCCAGACCAATCCTTTTTAACATGGTACTTTAAGATCCGTCTTAAAACATTATTTTACCCCCACT
1441	TGCAGGAATTCAGCTTTTTGACTCTCAAAAGACACACTTTGTTGGAATGCTGCATTGTACATAAATACAGTCCCATGATGGATGGTAGTACACTGA
1444	TGCAGGAATAATGTCTTGAACTTATTTTCCTGGTGGACAATCTCAGTGCATGTGAGGGACAGGAGGTCCGCGGATAACAGTTGTGTGACTAAAACA
1446	TGCAGGGGAAGCACTTAGCAATAACTGCAATCTGATCCATGTCAGGCATCGTTACATTTCTGTGCATCAGCCTGTTTCTCAGACGAACTATCTCCA
1447	TGCAGGGTGCCTGCGCTTTCCCGTCAAACGCCTTTCCTTTTCTGTTAGTCTGAAAGGGAAAATGTGAATAACAGGAAATAAAATAAGCGCCTAAAA
1457	TGCAGGTAGTGGACGTCCCGCAGCCGCTCTTTACAGTTCAACTTGGTAAAATACACTGCAGCCTCATTTAGTGTGTCAACAGCCAAAGCTGCCAAA
1461	TGCAGGGTTCTGGGATCAGAGCTGGTACCATCATTAACTGGTGCTGCTGGTTCTGATCCTGGTTCCTGCTGTGGTACCAGCTGGTACCGGTCCGAC
1464	TGCAGGAATCTGAGATCTCCACCAGTAACTACACCGACGAGAACCTGCTGGCTATAGTCATAAATCTGTTTGCTGCTGGAACTGAAACAACATTAA
1469	TGCAGGACGTCTTCAGCAGCTTCAGAGGTGAGGCTGAGAGGTCCAGGTCCAGGTCCAGATCCAGGTCCAGGTCCAGGTCCAGGTCCAGGTCCAGGC
1470	TGCAGGGAAGGGACATTATTGATAATTTAATGACAGAATAGACGAGCTAATGGCTAGTTTTAGAGGTGCAGGACTGAAGTCATTATTGCTGTTTTT
1475	TGCAGGTTCCTGGAACTCCTCCAGCTCCTCCGCCTTCTCCTTCGCCACCGCCAGCACTGACACGGGGAAGCACGCCAGCTCGGCAACATGGATCCC
1479	TGCAGGGAGAGGCGGAGAGACTTGGAGAACATGGCTGCACTCCCCAAACCAAAGTCAAAACGAAACGCTACATTGCATCCTTGACCTCTGAAGTGT
1481	TGCAGGAACCGGATCTCTGATTCTTCCCTGTTTCAGGAACGCGTCCAAACGAGGCGAGGCCTTCGGGATCAGCAGAATCGGCAGCAGAATCAAAGG
1483	TGCAGGATGGAGGTCCTCCAGGACCAGGATTGGACACCACCGAGACAGATCCATGGATCGGAGCCTTGTCTGCAGTAATGGGGGCGTTGCTCCGGT
1484	TGCAGGCGGAGAACGAGGGGCTGAAACAGCGTCTCCTGGTGGCCAAGCAGCAGCTCCTCAGCTCGCAGAGCCGCAGGCCGACGCCGTACGGACACG
1500	TGCAGGAGGGAGGAGTTTATCCAGATTATAAACCGGCTCAGATCAACAACAACAACAACAAACAACAACAACAGCCACTCTGTTCTCGGGACACGT
1510	TGCAGGAGAACACGAGGAAGGATACAGGAACGACTCCAACGTTTAAACGAGCAGTTTGATCCAGTGACATATTTATCTCATTTCTAACAGGCAGCT
1515	TGCAGGGGACATTCAGGCACCAGTCCAGATGGATATGGGCCCAAAGATGGATGGCTCTGATTGGTCAGATTGGCAGCTGGTCTCAGGTCGGGTTTT
1528	TGCAGGAAGTGCTGCAGGCTTCACAGGAAGTGCTGCCATTATTTGTTTGCAAATCACCACAAAACTCCATCTAAAAAAGAGTGTATTGCAAAATTG
1529	TGCAGGATGGAGGCCCTGAGGACCAGGACTGGAGACCCCTGATCTAATGGTATCAATATGTTTGTTTTTGATGAGTTTATATCAATCAGGTGGCCT
1532	TGCAGGCTGGGGAATTCATCCAACATGGTTTGGTGAAATCTGAAGTGATAAGAATTAAGCAGAGAAATGACATTTTCTGCAGAAATGCAGCTCGAT
1533	TGCAGGAGAGAGGACCAGACGCGGCGTCCCCCCGCCCCAAAAAAAAGACCGCCAACTTAACGCAACAAAATGCTAATTTCTCCTTCTGCGTTCTCG
1544	TGCAGGTTGTTTTCGGCTGTCTTGGCTTTAATCCCACAGCGCATCAAATCACAGGGAACGATCGCAATTTAAAATAAAATAAAAAAGTCCATCTGT
1548	TGCAGGACAGTACAGTGGCCCTCAAGGACCAGGGTTGGCCACCCTGCTTTAGATGGTTCTGGTTCTACTGGCTGTACTGTTGGAACTGGTTCTGGA
1550	TGCAGGAACCTCTGCTGGCACTCGGGTTCATTTTTGCGCTTGACTGATGCTAGATTGTGTGTGTGAGAAACACTCCCGGGTCTATGCAAACCGTAT
1551	TGCAGGGTGAAACGAGGAAAAAAAGCTGAAGATTTAACATTCATAAAATTTATTTAAGAATTTTATCAAATCCACAACAGCAATCACAATTTAATT
1565	TGCAGGAAGTTCCCCGGGCTGCACAGGAAGTGCAACAGTATGCTGCTGCTGTCACTATGGTTACAGTTCACCAGAAAGTTATGTGTAAATAATGGT
1571	TGCAGGGCTTACTTAGCATTAGATCACTGACACTTTATAACAGAGTCATGCTCAGTGGACTATTTTTTTTTAAGACAGTAAGTATTCTTAAAAAAT
1572	TGCAGGAAAGTGGCCCTCCAGGTCCAGCACCAGGATTGGAGACCACTGATGTAGGTGTATCCGAGTGGATGTGAAAGAATGTCAAGTTGAAGATTA
1576	TGCAGGTCACAGCAGAAACTTTCCTCTTCAAAGGAAAAATACTCCGACTATAAATGTTAATATTCTGTCTGCATCATAAAACAGGACACAGACATG
1579	TGCAGGTGACCGGTTCGTAACCTTTTAATCTGCGAGATATCAGACCCAGGGAGTGTTTCAGAGCAAACATTCGGACTCGGAGCCAACTTCAATATG
1596	TGCAGGCAAAAGGGGCAGCGTTGCCCAGGAGTGGGTCAGAATCTATCAGTCTTTATCAGTTCGGTCCTGAAAACAATCAGTTGTCACGGCCAAACC
1597	TGCAGGAGGTGCTGGCCGATGTTTTTACAGCCCACATATTGCAAGAAAAAGTTTAAATTCATGATGAATTTAAGTAGAGATATTGCGGCCAAAACC
1599	TGCAGGACAGTGGCCCTCGAGGACCAGGGTTGCCCACCCCTGCTTTAGAGCATTGACTCTCAAAGCTCGGCGCTGACAGTCCCTTTACCAGGACAC
1615	TGCAGGTAAGCAGTCAGCATGTTTCATCAAAATCACTGATCACTTCCACAAGAAATTTGGCCACGTAGACACAGCGCTGAAATGGACTTTATTGAA
1619	TGCAGGGAGGCTGTTTGTTTCTAGAGGATGTCTGCATTTCTGTAAAGATCGATGTTCTGACCGGACTCATGAGCTGACGGCTGGTCCGAACGGAGC
1628	TGCAGGTTCTGAAGGGCTGAGAAACTTTCCAACCTTTTATTAAAAGGAGAATCTTTTTCATCTAGAGAGCAAACCAATAAATCAAAGTTTCCAACA
1630	TGCAGGAGGGAACGCTGATCACACTGAAGCCAAAAACATCGGAGATGTTTGGGAAATGCTCCACGGGTCAGCCATGAGGAGGGTTCTGCTCACAAA
1637	TGCAGGATGAAATATCACCTGGTGTCACGGGCTGACAAGTTTACAGAGCGGGAGGTGACTTGTTGCTCGGCAACGGGGTGAAATACTGGATGTATC
1641	TGCAGGAACACAGCCATGGGGAAAGCATGCATTGCAGTCACCAAGTACTTTCTATTCCTCTTCAACCTTCTCTTTTTTGTAAGTAATATCATTTTT
1658	TGCAGGATGGTGGCCCTCCGGGACCAGGATTGGACACCCCTGAAAGGTCGACGTACAAACACTCCAAAACAACTTCATGATTTATGACAACACATG
1659	TGCAGGACTGGAACCCACAAGTGTAAAACATACTTTCCTCTCACGAGTGACTACACTGCCATTTGTTAGCTGTCTGTTCTCCAGAAAAAAAGATAT
1660	TGCAGGACTGATCAGTTCATGTTTTTAGAATTAAATTTTGAGCAAATGAGAACAATAGTCTCCAAACAAATCTTTCTCCCTACTGCATAAAATCCC
1668	TGCAGGATGGTGGCTCTGAGGAGCAGGAATGCCCACCCCTGCTGTAACCCAACAAGAGAAAAGCTAACTTAGATGTTCAAGATGACAACAGAAAGT
1670	TGCAGGGCCTCGGAACCAGACTGGGTCTCCTGGACCTGGATCCGGTTCTGTCCCCGGGCCGTCCGGCAGCAGCCGGGCCGTCAGGACGGGACGCTG
1674	TGCAGGGCTCCGCGAACAGTGCGTGGACCTGAGCACGCGGTGGAGGTGTTTATACTTAGCGCTTACATTGGTGCAGTATTCTCCAAAAAGATGGGG
1688	TGCAGGAGTAGAACGCTGCGTGGATTTAATAAATATTTATGTTCTGTGGAAAAAAAGATGGAACCACCTCCTGATGACGCCAAAAACAGCTTTTAA
1691	TGCAGGCACTAGCTCTCAGTTAAATTTCCAGAAACACAGGGTGAACATTCTCCTGTTGTGTGGTACATGGGTGAATGGGCAGTTGTGGAAAATGTC
1696	TGCAGGCGAACCTGACCCAGTTCAGATTCTGTTCCTCCGATGCGATACACATCTGATTAGTTCATAGCAAATCGGATTCTTTTCATATCTGACTCA
1704	TGCAGGCCTCCAGGGGGGCCCATGTTCCAGTTGCCCTGGCCACGGCCACGCCCCCTGCCGCCCCCGTGTCCTGGAGGTCCGCCAGCCTGAACACTC
1708	TGCAGGGAAAAGTGTGTATATGCCTTTAATGCGGATTCTTCTCTCTAGTCAGTTGTCAATTTGCTGGTATGAAAAGACAAACTGTGACATAGTCCA
1709	TGCAGGGATAATCATAATGGTCTCAACAATGTAAACGGCTGCATAGTAAAAAAAACAAGTATAAAACAGCAGATCTTCATTCGGTCCGACCTGGTG
1710	TGCAGGTAATCAGGCTGCTTGGACCTCTTTCGGTTGGCTGTCCTGGAGTATACCGCCAAAGTCTCGAGAAGGGTTTTTCTGGCCCTGGTCCAGGTA
1711	TGCAGGTGGAGTGGAGGTTACAGCTGGTGCAGCAGGAGCTTCTGACTCGTCTGTAGTGGTGACCCTTTCTGCTTGTAGCGCAGTTGTAGTGGCTGT
1716	TGCAGGCAGCGAGGATTTAAAGCTGTAGGGCAGCTCTCGGGGTCAGCAGGCAGATCGTTAATCAGATCACTCTCAGCTTCGGTACAGAGTCAGTTC
1725	TGCAGGAACATCATATTTCTGCTGAAATAACCGTGGACAGGTATTTAAAATAGCATTAAATTTTTAAAAGTAGGTTGTTTTTGTTTGAGACTTTGG
1727	TGCAGGTTTGTAAAGACATAAGTAGTAAAAAGTGCTTTAAAATCACACAAAGGCAGCCCAGAATCTTTATGATGCCAGTAATTTCTTTTTTCTGTT
1729	TGCAGGCGCACCTGAAGATCCACGTCTGCAAGTTCTGCGGCAAAACCTTCCGGCGCCGCGTGGAGCTGGAGGTGCACGCGCGCACGCACACGGGCG
1732	TGCAGGCAGGAAAACAGGAAAACCTGGTTTCCCTCGTGTGTTTTGTTTTTTCGTGTCTGTAAATCAGCCCGAGTCGCGCCGCAGCCGAGTCCTGTG
1735	TGCAGGCGGTCAGCCGTGGGAAAAGTTTCCACGTCGCTTCAGGTGTTAAATCGTTACAGTATGTTCTGTTCCAAGTTAAAAAAAAGATAATAATTG
1736	TGCAGGCCTCGGACCCCGACAGTTCAAAAGAACAGCTGGAGTTCTCCATCAGCAGACCGCTTCAGTTTGGTTACCTGGAGAACGCTGGCACAGGTA
1741	TGCAGGTCGGCGGGGCTCCGGCCCGCAGCCCCCGCACGGCCGACAAGGTGTCGGAGGCCGACATCCAGCGGCTGCTGCACGGCGTCATGGAGCAGC
1743	TGCAGGAGGAGACAGATTTATGGTGGTGTGATTCATTCCCAGTCAGTGCTGCACACGTTTGCTGAAATGCACATGAAAGAATTTTACCTCAGTTGG
1750	TGCAGGCACCTTGTCAGTCACACGCTTTCTTAATTTCTTAAAGCATTTCTTGCTTTTCTTTTTTCCAAATCTTATCCTTAAATTATTTTCTTCTTT
1758	TGCAGGTTAAAGCTCCCTGGAACACAACGAGTGAGAGGTACATGGACTGTACAAACAAACCAGGTGTTTTTTATCTTCTGTCTTGATAAAACATCT
1765	TGCAGGGGGCACCGCAGCGACTACAACACCTCCTCTCAAGTCCTCTCTGGTTTCCGGTTTCCACGACGACGACCATGGCAGTTGGCACCATCTCTC
1768	TGCAGGACAACGTTTTATTTTGAAATCACCAGTTTAAAAAAGATAAATAAAACCCTCCAGGAGAACCGCAGAAAGAAACAAACGAACCTCGTAACC
1789	TGCAGGTTGAGGCCCTGCACACACAAACTTTCTGTTTCTGAAAATATCCTCGAAGACGCAGCAGAGTTTCTACAAATGTTTCCACCGACATGGAAA
1821	TGCAGGACAGCTGGGAAATAGTGGAGGGCCTGCGTGCGGGCTTCAGCAACGTCTCGGAGCCCCAGAAACAGGAAGGCTTCATGCTGAAGAGGAGGA
1823	TGCAGGCTGCCCAAAGCTGCCCCCCTCCCTCATCATATCACAGGCAGGGGGCTATAGGAGCCTGCAGCAGCCAAAATAGTCAGGGTCACTGAAAAT
1825	TGCAGGTTCACCAAGGGTTTACTGTACAAGTTATTGTTTTGGTTTTATTTTCCCACATCTTTGCTGTTTTGGTTCTGTCACTCGGCGATATTATAC
1829	TGCAGGTCTGGTGTCTGGGGGCCTGTCACTTTCAGACCTCTGACAGAGCAGAGCAGCATGCAGCTGCTTCCAGGATCAGTGAGTCTCTGACTGCTG
1832	TGCAGGAAGACAAACACGTTTTTGACCTCTCAGCTATGAGCTCCTGCTCCTTACAGCCTAACACACATTTATTGTTTATTTGCTGACATGTCGGGG
1838	TGCAGGTATTGTGCCGCTGGCTTCTGACCGTGAGGAAGAACTATCGAACTGTAGCGTACCATAACTGGAGGCACGCTTTCAATGTGTCACAGTGCA
1845	TGCAGGATGTGAGCCATTCTGATGAAGACTGACATTCCTCTCATTGTTACTTTTAAATAATGACAAGAATAAGCTATAATGTGAATAAAAGTTTAA
1847	TGCAGGTTTCACTCTGCAGTCATTACAATTCCTCACAAAAGAGGGGGAAACAAACGGGAGAAGAGAGCGGTTTGTTGCAGAGACAAGCAGGCTTAC
1857	TGCAGGAAATCAAGATTAACAGCACATTAGCAGGAACTTAATAACTCTCAAATAGTTCTCCGAATTGAAATTATTTTTCATTGCATACAGAAAATG
1863	TGCAGGCTGACCCGACGGTGCCCCCCGCTCCTCCCTGAGGAGATAAGAGGTTTGTTTGATGTGGTCGTGTTTGTGCAGGTCGGTGCAGAGGCGATG
1866	TGCAGGATGGTGGCCCTTGAGGACCAGGATTGCCCACCCCTGATATAGAGTGTACTATACAAGAACCCAGATCCTAAACGCCTAAAGCCGCTCAGT
1868	TGCAGGAAAACGACGATTTTTTTCCCCTGATTTTAACGTTTGCATAGTTTCATATCAGTTGGCTTTAAACAACTGAACTACTAGGATGACGGTTTT
1885	TGCAGGTTTTTTTTTAATAAACCCCGTGGACTAGGCGGAGGTTTGCGCTCTCAGTGATGACATCATCGTCGCGTGACGTCATCGCTGCATGTCAGG
1889	TGCAGGTCTGTCAGTAAATATTCGGCCCTAATGTGTAACACGTGCTTCATAGCATGATAAAAACCTTCAGTGTTTGACCACGGAAATGGAGGCATC
1894	TGCAGGGCGAAAATCGGCACACACTCCTTTTACCTCTGAAGGGATTAAATAAATGAATATTACCTGGCTCCTTCTGGGAGCCGTCTCTTTATGTGG
1896	TGCAGGATACTTTCCAGCTCAACTCCTTTACCGTGCGCCTCTTTCAGGACGCTCCGAGCGTCAGACAGCGTCTCCTCCAAAGCTTGACTCTCTTTT
1904	TGCAGGGCCACGGCCACGGGCTCCAGCAGGTACTCCAGAGAGGGCAGCCACTGCAGGGTCAGGGGGTAGTCGGACTCCCGGCGAAACGTGGCCGTG
1908	TGCAGGAGTGAAAAATCATCCTGCATGGAGAAAGAAAGGGGATTACCCTTTCATGATATAATAGAGTTTGTGTGGCCAAAATGCACATTGTGTCAG
1909	TGCAGGCCACGTCCCGCTTTTGTTGCCTGGAAATGGTGGGCTCCCTTCTCAGGGGTGGATGATGTGAGAGGGAAAAGGGGGATAGGAAGGGTGGGT
1918	TGCAGGCTGAGGGGGCATCAGTGTCAGCGTGAACTGTCCATTGACATTTGAATGAAATGGCAGGAGACCCAGGAGGCACCCTTCAAATATGAGAGA
1921	TGCAGGTATCACCCTAGTGCTGGTGTACATTCGCAATCAACCAAAATATGATAATCATTGCAAGATGAATCAAAGGCAACTGGGCATCTTTCTTAT
1928	TGCAGGAATAATTACCTGGCCAAAGGAGGAAATGAAGACCACAGATGTTAGCTCTCCTGTTTTGGTTCAGCCGTGAGCTAGATGCCGCTAACTCCG
1931	TGCAGGGAGGGGTATGAAATCCGAACTGATGACCCCACCAAGTGCCGGCGTGAGTCACATGTCATGCATCTCAATGGCAGAATAACAATTCTCTCT
1934	TGCAGGCTTTAGGTGTTTTTCTGCTTTGACACACCTCATTTGAATGACTGAGGGATTAACAAGCTTCTGCAGAACTTGAAGACCTGCTGACGAATG
1937	TGCAGGTTTTAGGTGTTTCTGCTCCAACACACCTGCTTCAAACTGTTTAATCACCTCCTCACCAAATCATCAAGGTCTCCAGCAGCATGGCAACAA
1939	TGCAGGAGTTCACGTCTTTATGCAGCCGAGCCTCAGAGCCCTTCAGAAAAGCAGGAACAGGTTCTGGGTGTGGAGGTGTCTCCTCGTGCCTCACCT
1940	TGCAGGACGGAGGAAGGAGACAAACTTTAAAGCCTTTTATAACCTTTTTAACCAAAATAAATAAACTAAATTATGAATTAAAACTCACAGCCAGGT
1948	TGCAGGATGGAGGCCCTGAGGACCAGGATTGGACACCCCTGGCTTAGAGGCATTGTCATCCAATGTGAAGGAGGCCTAAAGGTGGAAACATGCTTT
1950	TGCAGGAGATGGTTCTCTGTCACGCCGTTCGTTTGGGGCCTCGCATCGTGACCTCGTCCGGCCAGGATCGAGCCGGAAAACGAGCCTGACGGAGTC
1952	TGCAGGATGTCACTGCAGTCAGGTAAGGGCCTTGCGTCAGAACAGCTCTAGCTGTCATTGACCAAATATAAGGTGCACTGAATGATGATTGGCAGC
1953	TGCAGGGGATTTTTTATCTGTCTCTTTGTTTTCAGAGCTGGCCTCGTTAGCATAAAGGTGGTTTAATATCGGATCTGTCCTCCTTAACGAGGGAAT
1962	TGCAGGCAGTCTGGGGTCTAAAACTCCTCGGATTTTTCTCTGGTTTTGACTGCTGCCTCTTGCTGTGGATGAGAAACAGATTCCTCTTGATAAAAT
1976	TGCAGGTAAACCACTTGTTTATTATTTACAGCAGAGCTTCTATATCTGGGACAAGTGAGGAGTGTTCGTGATTAAAGCTCTGAAACATTAACCTAA
1988	TGCAGGAACAGAAGTCCGCTTGGTTGACTGCTCGCATCATAAACAGGTTCTCTGGTGCTTCTCGTGGATTAGATCTGATTTATGTTTTCTCATTAT
1995	TGCAGGACGGACAGGAACATCAGTTTAATATTGTTTGCTGTTCTTTCTGAACATATTGTTTTCCTGTTTTTTTATTATTTATTTTAGCAAACTTTC
1998	TGCAGGTTTTAGATGTTTCCCTGCTCTTCAGCAGGTCTTTAGGTTCTGCAAAAGCCTGGTAATCGCTCAGTCATTCAAATCAGGTGTGTTAAAGCA
2000	TGCAGGCCAAACCGCCCTGCTGCTCAGACCTGCGTGGAGGATGAGAAAAACATTGGTGTTTTGTCAAAAGTGTCAGTATCTTGAGTAAATAATGTG
2005	TGCAGGAAAACGTGCAAATTCCAAAAGGTTAGGTGCTCAGTTTAAAAAGGTCCCAGCTTGGGTGAGTCAGCTCTAAGTGCTGCTGGAGCCTTAAAG
2007	TGCAGGAAAAATCTGAAACATTTATGGATGAACAACAGAACTTTCTGACTTTAAATATCAGTAATTCCTGCTGACTCAGAGTTTTTTATCTTTTAC
2017	TGCAGGAAAAGACAGTGGATCTATTCCTTTTCAATCAGCCAGGCGATGAACCGGGTAAAAGTGGGAGAGGAGGAGCTTCCCCCTTCATAAAAAGCA
2021	TGCAGGATGGTGGCCCTGAGGACCAGGGTTGGACGCTCCTGGTTTAACGTATTCCGGTCATTTTGAAGTGGAGCTCAGTGGGAAAGCTCTGAACAG
2023	TGCAGGACGCCCCACAAGTGCCAGCTGAGGCGATAATCCAGGCGCTGCCAGGTGACGGCGAGCGGCTCGAGCAGCTGCTGCAGGCCGTAGTGTCTG
2028	TGCAGGAGGGACTTAAAGATGGCGGTTCTGCCAGTAAACTTCCTGTTTCAGAAGTGATTAAATGATGATGATGACACGTATGTACAGTGATCCCCT
2039	TGCAGGCCAGCTCTCCGTCTCGCTAAATGGGGATGGATAGCGGAGCGTCAGCGCTGTTTAATCGGAGACGAGTCGCTACGTGGCACTCCCTCCCCC
2043	TGCAGGAGTGGACATCACTGTTATAAATGCTCTGCAGGTTCAAATTCCAGCTGAAAAGCTCCTAAATCTTACGGAAAGCCTTCCAAGAAGAGTGGA
2048	TGCAGGAATCCGATCCTGCTCGTCGTCCTTCTGCGATGAATTACCAACATCTGAACTTCTGAAGCTGTAAAAAGCTGACCATGTAAACCACCAGAA
2054	TGCAGGAAACACAAACACAGAGTTCTGTCATCAAATAAAGCTTTCCTTTTAGGTTCCTGAGGTTCTGGATTGGTTCCTCTCAGACCCAGGAGAAGA
2056	TGCAGGTGAGAGGAGGCGGTCATTCTGAAGCTTTTCTGACACATGCCACATGTTTGTAAACAGACGGTACCTGGATTTATGAAGGGCTGTCCGCTC
2060	TGCAGGATAACTTACCTACACAGCCTCAACAGAAGCCAGCTGAGACATGTAGTTATGCATTTCAAAGTGAAGCACATTTTTGTTCTAGGACTTCAG
2070	TGCAGGTGGGGCACTCCTTGTTCCTGAGAGGTCACAGCGAAGAATCACTTTTAAACACAGCATCATTACAGAAAAATACGTCAGCAGATCTGATAG
2071	TGCAGGGGGACCTCTATGTGTGAAACACTCCTTTTAGCGTCTCATTTAAGTAATTGAAGGGCTCTGGCTAATGCCTGGAGAGCGATGGTGAACCTG
2076	TGCAGGCGGTTCCACCCAAACATCCTTCGGTCCTTCTTCTGGAGATCTTCTTCGGTTCCTGCAGCAAAAAGCCCAGAGAGGAGTCTGCACGAAGCT
2077	TGCAGGCTAAGAGTGGCTAATGGCAGCCGGCAGTGGCTCTGGAGTTTGACATTATACAAGTTAAGGCCCATTGACTTTTTAGAAGAAAAACAATAG
2091	TGCAGGTCCCGGTACATGTCGTTGGACACGACCACGCCGTCCGACTCATAGGCGTGCTTCACGATGAAGCAGTCGTCGTTACAGACGACCCGTTTT
2095	TGCAGGCGTCTCTTTGTTCGGAGTCTTTATGAGTTCGAATCCTTTTTCCACGGGCAGAAAGAAACTTAACGGCTGCAGTCGATCACGATCACTAAC
2110	TGCAGGATAGTGGCCCTCCAGAGCCACGACGGGACACCACTGACCTAGGAAATAGATGAGCACCCAGTGCCCTCATACTCAGAAGTATAAATGTCC
2114	TGCAGGCATCACTGATATGAGCTCACACAACTTGTTTTTGAGTAAAATTAATGATAAATGTATTAATTATTGTGACAGCAACAAATTTACAGATGA
2130	TGCAGGCAGCTCTACCTTCAGTCCCACCTGACACCAAGCTCTCCAAGCTGGATGTTCTGGTTCTGGCCACTAACTACATTGCGTACCTGACAGAGA
2136	TGCAGGAATAATTACCTGGCCAAAGGAGGAAATGAAGACCACAGATGTTAAGACTCGGAAGCTACCCATAAGTATCATCATGGGAGGACAAGCCCT
2147	TGCAGGACTTAGAAAATACTTTTTTACTGTTACGATGGCATGTGTTTTTAAATGTCTCAGTGCATTAACACATTTAAGATTGGCAGCAAGACATGT
2153	TGCAGGCAGGCTTCACCTGGTGATGACGCCTCTTTAAAAAATGATAAAAACAAAAACTAAGAAAAGAGAGAACATATTTAATCGTACATCGGTGCC
2157	TGCAGGAACGAGCTGCTTCGACAGCTTCTCGTTAGGCTCCGCAGGTGTCTGCTAATGACCCGTCATTTCACAACAGGTGTGTTAAACCAGCGCCAC
2159	TGCAGGACGATGTCCTTCACTGTCATTTTTTTTTCTTTCCATCTCCCTCTTCTTGGGAACAGTGGGAAGTTGTGGAGGAGAAGCGGAAAGATTTAA
2160	TGCAGGACTCGTTGGTCTCTCCTCGGACTCGTTAGTCTCTCCTCGGACTCGTTGGTCTCTCCTCGGACTCGTTGGTCTCTCCTCGGACTCGTTGGT
2163	TGCAGGATGCTCGGCTGTTTGAGTTCAAATCATTTTTATTCTTTCAGTCAGATGATGGATATGTTGGACTTTTCCTGCTGCCAGTTTATTCTTGTT
2167	TGCAGGAGGCTCTGGACCAAGCTTTTCATGGATTTGTTGCACATTACTGTGAAAAAACTGCACATATATGCAAAAAAAGACCTCTGTGCACGAGGA
2173	TGCAGGTGTAACTGAACCCGGCGCCGCCTGCAGCAACATTCTTCTCATTCTGCTGTGGTTTCCTCCTCCTCCTTTCTGCTTTCAGCAGATGTTTGT
2181	TGCAGGATGTGCTCTCTGCGACTGATTACCACTGTTTCCAACCACAAGAGGCAGCGTAGCGTACGATCAAATCACCGCCTTTGAACTGTTTCCATT
2194	TGCAGGAACTCCGAACCCGGCCGATAAGTTCTGCAGCCCGGATTGTTCCGGTTCTGCCTCCGGCGCCGTATCAGCGCCGCTCCTCCTTATGCATGC
2200	TGCAGGTCCAAACAAACGTTCCTGTTCTTTCACCGTTTTGGTTGGGACTGTTTCCGCGCTCGCCTCGTTGAAAGGCTGGCATCAGTGTTGCCAGAT
2203	TGCAGGTCCTGGGGCAGCGCCAGCAAGGAGTCATAGATCTTACACTGCATCTGACCCGTGCTCTGCATCACACAGTTCATCCACAGGCCTTCCCAG
2206	TGCAGGACTTTCTGAACATTTGTTTTTGTTTATTTGGACGACATCCTCATTTATTCTCAGAACCCCGAGCAACATCGTCAGCAGATGAGAGCCGTC
2209	TGCAGGATTGTGTGCTTTCTCAGAAACCATTAATGGTGACGGCCAGGCAATTCATTCTCGTCTTAACGCCCGTCTGTCTGCAGGTGTCGCGGACGG
2224	TGCAGGCTTATCTAGATTGGCTGTTGCATTATAAACTGCAGTTAAAGAGGCTCTGTGTTTTGTTATCTTAATCTGAAAGTGTCATGAAAAGTGTTA
2226	TGCAGGTTAGATTAATCAGTAACTCTAAACTGTCCTGAGGTGGGAGTGAGAGGGTGAATGGGTGTCTCTGTGTGTCCCTGTGATGGACTGGAGATA
2229	TGCAGGGGTGTTTAACTGCAGCGTAACCTTGGAGTGACATGATGAAGAAAACGAAGAAATGCTAAATTAGCTGAATATAATCAGGTTCAACCCAAA
2242	TGCAGGTAAATCAAATTTTGATTGCACTCTAAAATATTGTATAGGAAGGCATTAAACATGGCTGATGAAAATCAGAGGAGCCGAGGCAGTGTAAAG
2244	TGCAGGGATAAATTTGTCTCCACCTGGATTGAAGTAACAATAAACCAGTTTTGAAACCTGGCGAAATGATCAATCAGGGTGCAGATTTCTCGGACA
2246	TGCAGGATGGTGGCCCTCCAGGACCAGGATTGCCCACCCCTGGTGTAAACCATCCACCCATTCTCTTCCGCTTATCCGGGGTCGGGTCGCGGGGGC
2251	TGCAGGCATTAAAGAGGAGTTTCCTCCTGAGCAGCAGAACTGGAGTCCCAGACTGGACCAGGAGGACCCACAAGTTAAAGAGGAAGAGGAGGAGGC
2261	TGCAGGCTGCGGAGCGACGGGCAAACACAACATTAACGGGTTCTAACTTTGTCTGAGCAAACTAATGCTTTTTGGAGGATCCAGACGATGGGACGG
2270	TGCAGGCAAATAAATTCAGGTCTCTGCTTGCCTCTGTGTTTGATATGTGGGAGCAGTTGTGACGGAACTCGGAAAACAACAATAACAACAACAAAT
2271	TGCAGGTCACAAGATGTTTGGCAATGTGATCACAGGGCACAGATGGAGGAATGTGGGTGTTGGCATTTCTCAGACATTACTTTTTACTCAGTCCCG
2272	TGCAGGAAGAAACTCAGTCAGATCCCTTCCATCTTTACAAAAGCGACACACGTTCTACTTTCTTTGGTTCACTGTACCTGGACTTGATGAACCTGT
2280	TGCAGGAATATCCTAAAAAAATTGTGTAATGCAAAATGGATGGCTATGTAACTCTGACCAGTCTGGTCATAACTCCTTCCGTTATGTACAACAGGT
2296	TGCAGGACCCACCTCGTCCTCAGAGTCCAGCAGGGGACACAGCTGCAGACTCTGGTCCTGCAGACACGTCTCTCTGACGGCATAGCCGCTGACGCA
2302	TGCAGGCCCACGGGTCAGCGCTCCTGATTGTGAGGTCGTCACTTGCCCACATCGTAGCTCTGTTGTGCCACCTGAAGCTGTTTGGGTTTTGTGTTT
2303	TGCAGGGATTTCCGATCCACGATGCCTGTCTGTGTCTGCTGAAATGTCTCCACATGTGATTCCCTGCCGGCTGCTTTGCAAGTTGGCTTCAAACTG
2305	TGCAGGATGGAGGCCCTGAGGACCAGGGTTGGAGACCCCTGATATAATCAGACATAAACAAAGATCAGAGACACTCTTCCATGCTTTATCTGATCC
2307	TGCAGGTACAGAGTCTGAACCCACCGAACAGCGACAGCGGAGGCTCCTTCCTCAGGCGCCGCAGAGACGGCAGAGGGTTCAACCAAACCACCGACG
2310	TGCAGGGTGTGAACCGCAACGTCAAAAAGCCGGGATATTTATGGGGTTTAATATGTCCTTTTAGCAATGAATTACAGCGTACAGTTTAACAACCGA
2319	TGCAGGATATTGCAGAGAAAATGGTAAACTTATGTAAAACAGAAGAGGTGCAGTTGCAACAGAAAAGGAAGAGAGAAGTACATGTCAACTCTCAGG
2334	TGCAGGTTTTCAGGATTGGACGTCAGGATCTGGGTGCTGGATGCCAGTACCTCTAAATCTGCTCCACTGGTGAGCTGAAGGACAAAAATCAAATGT
2339	TGCAGGTAGCCCACTTCACTCAACCCTGTGAATTGAAAGCATCAAACATCATTTTGAAACAATGTATTGGTCTGTGGCTCACTGGCTTGTTTAAGT
2348	TGCAGGATTTACTGCATGTAAAGATCTTATTTTAGACTTCAGAGGAAATAATCCTTCATTAAACACATCAGAAACAGATTAATTCAGAAACTCTCC
2352	TGCAGGGATGTGGCAGCCACCGCCTGCATTGCTAAGTGAACCACTGACAGCTGTGACATCAAATCACTATTTGAAAGCATAGCTTATCGCTGCAAC
2355	TGCAGGTTTTAAACTCGCGTCAGCTTGAATAACTGTTCAGACCAGCGGTTCGCTCCGTCAGAGTTAATCTGAGGTTGTTTCTGCAGCAGGTAAGAC
2367	TGCAGGCATTACCTGTTTAAAAAAAAACAAAACGCCAGGTTGACCGAAGTAATGAAGGTTAATTGAGAAAATACATCGACCAAAGGCTCCTCAACA
2369	TGCAGGGTAGGAGATTAAAACCACTCATGACTGGTTTTCAACCTTGTTCTTTGTGTAAAGAGATTTCAACAAAGTCCCTGAATCTTTTTTAACAAT
2377	TGCAGGAATTGCTAGAAACCCTGCCGCGAAAAGCAACTGCCACTTGTAAAATCAGCCTCTGACGTCTGAACACAAAGGTGAACGGAAACAAGAATG
2378	TGCAGGATCGAGGTTAAGGAGCATTCTGGTGCTCGGTCTGCGCTCAGGGGCATCTTGTAGCTCTGAGGAAGCGGTGTGGGCAGAAGGGGGCAAGTG
2379	TGCAGGTGGAGGCGGTGTGCCGCGGCGCGACGGCGGAGCTCTGGGAAGACGCTGCGCACCAGGACGTCCCGCTCGGCGTGCATGTCCCTGAAGGTG
2386	TGCAGGAAAATTAACGCCAACTTCCTCTGAAGAGATTTTTTAAGTTTCAAGTTCAAAGATGCTGGTTTTGTACTTTGAAACGAGACGAGTTGTGGG
2398	TGCAGGTAAAGAGAGGAAGTTTGCCTGAACAGCGTAGCACAGCTGCAGCCGTTGGTGCGTCGCCCCGCAGGGCTTCCGATCAGACTCACAACCAGC
2400	TGCAGGAAAATTAATCCTCCATCATGCATTTATGGAAACGTGCAAAACATCTAAGAACTCTCATGGTCCACACTCAAAAAAGCAGCTTTTATGGAT
2413	TGCAGGCGGCCCGGACAGGTGAGACTCTCACAGAGATTTTTATTTCCTGGTCAGCTACAAAAACAACGCTGGCCGTTACCTCGATGAGGAAGTCTC
2417	TGCAGGCCTCCACGGGACGGGCTGTTTGTGAGATGACAGGACATGCCAACAAATTGCATCACTTCTGGCTGAGCGGACGAGGATAAAACCGAGCCA
2429	TGCAGGTCAAAATTAATTTCTTCAGTAGTTTTTTTTCTGTCCAATATAAAATCAATTTAAGCTTCTCATTTTTTCATTAAACTCACATTAGACACA
2432	TGCAGGAACGATGACATAAAGATCGTGACGTAAAGGTTTATAAAACAGCGTTTGCCTGAACTGCTGTGGATTATTTGAGTTTAACGCCGTTTTAAG
2436	TGCAGGCCCGCTGGTTCCTCAAGCAGACGGGACGCTACGAGACTCGGCTTGGGGACGCCGTGGACGTCCTGTTCGTGCTGCTGTTCGTGGTGATGC
2447	TGCAGGGTAGGTCCAGCTCTTGTTGCAATTTTGTTACAAATTTGTCTATTTTGTCTCTACTGCATTTGATTTTACTTAAAAAAACTGAGCATACTT
2453	TGCAGGATGGAGGCCCTGAGGACCAGGATTGGACACCTCTGGGTTAGAGTGACAGTCAGCCAATTAACACACCTGAGGTCGTTATTTAGGCTTGCT
2454	TGCAGGGACATGCCAGGCTGGTCTGAATGAAATCAGTGAAAGCTTCTTACCACTTGTGGATCTAAAATTAGGGAAAAAAATTAGAACCAGGTTCCC
2456	TGCAGGATGAAGGACGTGTCATCACCTGCGTCAGGGTCACAGGAACCGTTTCATGTCATATGTTAAAGACGGGACAAGAACAAACTGACCGCCAGG
2457	TGCAGGTCAGGAGCAACGCAACATCATCCTTGGAGGGATGGAGAGCTTTCACTTGTCAACCTGCATTCGCTTTGTCCCATGGAATTCAGATGATTG
2460	TGCAGGAAACCGGGGCTCTGCACGCGGATCTGTGTCAACAAAGAAGGCCCGGTTCTTCAAACCCGTGATGAGGTTCTGGAGGCTGACGCTGACAGA
2463	TGCAGGACGGTGGCCCTCCAGGACCAGGGTTGCCTATCCCTGATCTAAACAGCAACATCATCGTGACAAAATCTGAGCTCTCTGAAGCACCAATTA
2475	TGCAGGTATCAAACTGCTGCAGTGCTTGACTGAACTTCTGAGGTAATTTTTATTTTTGTCTCCACAGAAAACGTTACAGAAGCTTCGTGCCAAACA
2476	TGCAGGCTCAGATAAATCTAAATAAAATAATCCGACATGTCGATAGGAGTATGTTTCTATGTTGGAGCTTAAAACACAGCCTTCCCAGACGTATCA
2482	TGCAGGAATGTCATAACAATTCCGCAAAAAATAACGACTTAACACGAAACCAAAGCTCTACAGAACAGTGTTTGTGTGAAATCCTGGAGCTCAAAC
2488	TGCAGGTTTGATTAAAATCTGTTCAGTGGTTTATGCGATATTTTGCTAAGAGACAAACAAAGGTGACTCCAAATACTTACTGAAGTTAATGGCAAA
2490	TGCAGGTGTTCCTCTCACAGAGCTGCAGCAGATTCACAGAAATCAGTTCTGTTCACCGCAGCACCTAATTGGTTCCTTTAATCAGTTTAACATCGT
2493	TGCAGGTCGGTACGCAGGCGGGAACAACGGCCACAAGCTGTATTCTTCCCTGTTTACGTTGTATCATATTTGATTTTGCCGCAAGGTCATATTGCA
2499	TGCAGGGACTGTCCGAGGCTGCAAATGTTGCGGTTTGTAAAATAACACTCACCTGAGTCACTTGGAAATTTCGAAGACGGAAGCTGTTTTAAGACG
2504	TGCAGGTAGGTCCGGCTCTTGACACCTTCAGGGACCCGGAGGCTCGTCGGCGGGCGCTTGGAGCTCACCGGTCCAACTCTGGGACCCGGAGAGGAC
2508	TGCAGGATTCAGGTCTCATTTATCATAAAGTGACTTCCTGGAAGGATTGAGGTGTAATCTGGGATGGAAATCAGATGAATGAATGAATGAAAAAAT
2516	TGCAGGTTCCTTCGGTCCAGACGGGTCAGAACCGGGTCAGAACGTCCAGATGTTCTCATGTCTCCTCCTGACCTCCTCCTGATCTTCCCCTGTTTC
2530	TGCAGGCTGACGGTCCACAGAGGCCGGGTCTTCTGCAGACCCCACAGCATCACCTGAAACGGAAGGAGGAGCGTCTGATCCGGGCGCGGCGCAAGC
2531	TGCAGGCACAAAACGACCAGCAGCAAATGTTTGTTCATGACTGATGATCGGAGCTCGATTCATCTGCAACAAACACGTCTTTATATTCTCCTCGCC
2541	TGCAGGAAGTCAGGTGAAATCCTGCACAATCTCATTCTCTCTTAGTTGTGCTCCCTATTAGATACATATAAACCAGGGGTATTTGGATTAAAAATA
2557	TGCAGGGGAGGTTATGACTTTTTGATTTTACATGTCAAATTGATTTTACATCTTCTCTTCCCATAGCTCCTCTGTTCGTACAATTAGAGTATTCTA
2561	TGCAGGGTTAACCAACCATGTTGTCACGAGACCATGTGATTAAGGGGCTCAAATGCAGAAAAGAGGGGTCAGATGCAAGAATGTGTGGGCGAGCAC
2567	TGCAGGGCTTGTTAACTGCTCCCTCACTACGGCAACTGGCTCGGATGGATTGGCTTGTTCACACCGGACAGTGTTGAGTTTGATTGGCCCATCTCC
2570	TGCAGGTAGACTTAAAATACTAGATCTTTGACCCGTGTCTCCTCTCTTCTTGTCCCCTTGTGTCTCCAGTAAACGTTATGCGGTGTTCTGTTTGCT
2577	TGCAGGGTGCAACGATATGAATTCATTCAAGGATTTTATACCATTTTAAAGTAATCAAATGAGCATTTTAGGCCTGAGTCCTCTTCCTTAAACCCA
2578	TGCAGGATGGTGGCTCTGAGGACCAGGACTGGAGACCCCTGCTGTAACGGATGCAGGATAAGGGTTAGCATCGTCTTGCTGAAGGCTTTCCCTAAA
2583	TGCAGGAGATCAGAGATTGTTTACGGAGGTAACAGTGTAAATGTGTCCACGTTCATAAAAATCATTCTGCATTTGGCTCCTAAGAGTAGCTTTAAT
2584	TGCAGGCCAGCCAGGATGCTCTCCGAGTCCTGGAGCACCGAGTTCACCTGGTTCCACACCTCGCGTTCTCCGTCTGTCGGCTGGGCATCTGACACA
2588	TGCAGGGGGCAGTAGACGCCACTGCAACCTGGGATAAGTTGATCCTGTGGAGCAAAGCACAACTTAGACTGTGGGGAAAAAAAGGACATTTATTAA
2589	TGCAGGATATCCACTCCGGCTCACCAGTCATTCTCTGCCAGATTGTCGGCTCTTTCACTGCTGTAGTGCTCAGTTTGTTGACAGTTATTCCTTGTG
2594	TGCAGGGGCTTTTCCACAGCAGAAATTCCACAAAAATGAAAAGAACTGAAACGTGTCGTGGCTGTCCAGCAGAAACCCTGAGCCTCCGAAAACTTT
2617	TGCAGGAGCAGAAGACGGTCATGGAACGGTTCCGGACTTCCTGTGGACCCGTCTTCAGTGTCGTTCAGATGCATTCTCACCTTGACGTGCTGAGTG
2619	TGCAGGGATTGCAGTTGGAGTTCTGAATCTTTGTAACGCCTCTGTTGTTCTACAAGTTCAAGACGAAGATTGGCTACTTCGTTCTCAGCCTTCGGG
2621	TGCAGGAAGCCGGAGAGACGGCACTGCACTACGCCGTGCGGATGGCTGACCAGACCTCGCTGCATTTGGTGGACTTCCTTGTCCAGAACAGGTAAA
2623	TGCAGGGGCGATGGTTCTGCTGGGTCTCGTAGATTTATTAGTACACCTGAGCAAGCAGCCAGTCGCGGCTGCTTTTTCTCTTTTTTTTGGATCTGA
2626	TGCAGGGAGGTGACGGAGGCGAGAGTTCAACACATTAGAAACTTGTTATTTGTTTTATTACTCATGTCACAGCAAATAACTAGGTCAATGTTTATA
2631	TGCAGGAGGAGCTCAGAGCAGATCTGCTCCTCCTCACAGGAAGGCCTCCTGCTTGTCTCCCTCTGGATATTTTCATTCCCAGAACTCTCTGAAGGG
2643	TGCAGGGAAAAGGTTAGCTGCTGGAAATCCCATTTGTGGAGTAAAACGGAGTCACGGCTGCTGCTGAGTGTGACAGGATGAAGAAAAGACACGTGA
2644	TGCAGGAAACACATAAATTTAAAGCTCAAATGCAGTGTGTGTATGTAAGTGGATCAAAATCGTAGTTACATAATTTAAAGCACATTTACCTCTCTG
2661	TGCAGGTTCTCCATGAAGCCTCACTTGGAATACTTGTGTCAAACTGGACATTTATTTACGTTTTTGATTTTTTCATATTGTGCTTTAATTTTCTTT
2667	TGCAGGTCGTGTCCCGAGGCTGCACAGGAAGTGCTACAGCTAGCTGAAGTTATCTGAGCTTGCAAATACCTGTGTAGTGATGACATAAAGGTTTAT
2670	TGCAGGACAGCTGGGTGATAATAAAGCATCTGCTGGCTCCCGTCCTCACGCAGCAACAGCCAGGATGTCCACAACTAATGTGTTGTCACTTCCTCC
2676	TGCAGGTTTCTGCTCCAGTTTGAATCAAATTCAAGAAAAAGGTTCCCACTTTTATTCTGTTTGATCACTGCTGCTGAGAGCAACAATGGAAACAAA
2703	TGCAGGGGGAGATAGAGAGCACAGGGTCACTGACGGCAGCAGTGGATCAGTGGTCGGAGGTTCGTGTCCCTGAACGCCTCACTGCCTAAAGCACCG
2705	TGCAGGTGGATCAGCGTGGACATCTTACTTCAGGTGGACACTCATGAGCAGCTAGCTGACAGATCTGTTGGTAAAATCAATCCCTGACAGTCTTCT
2712	TGCAGGGCTGCGTGTCTGAGCTGCAGACCTCCACGGGACTCCCTGCTGCTCTTTCTCCTGCTTGGATAATGGTGGCGGTGAAACACTTTGCCGCCA
2721	TGCAGGAGACACGGTGACACCAGATAACGCCGCTTCATAAAAGTCTCGCAGAAACGTAAACAAGCCGACGTGAAATCCTTCAATTCTGATCGATTC
2729	TGCAGGATGACCGCTGCTTTCCTGACCTGTCCGAGCTGCTCAGCGTCCCTTCACACAGTAAGTCCCATGTTTAGGCTCAACTGTTTACATTTGTAG
2731	TGCAGGATGGAGACCCTCGAGGACCAGGATTGGACACTCCTGTATTAAGAAATCCCTAAACTTGGCAACGGGTCTGAGTTTTAGAAACACGCGTTG
2738	TGCAGGGAAACACTCAGACCTTATCAGGACGGTTGACAGGATAAGAATTGACTGATTGAAGGGATAATTAGTCCGCTGATGGATGGAGCGACTTGC
2739	TGCAGGGACACAGAGACAAACAGGTCTGATGAAGACAAGCAGATAAACAGATGAACCTACTGGGGACAGGACCTGAGGTCTTAATCCATAAGTTCA
2740	TGCAGGCGGATCGGCCGGATTCCCAGAACCACCAGCCGCTCGAACAGAGACTGAGACAGACCCGCCTTGGCTGCCTTCTTGCACATCACCACGGGA
2742	TGCAGGTTCACCAACAGTGATGGTTCTTTAGGAACATCCTCATGTGATACAAGGCAGAACCATTTGTCTGCAATAGTGCATATACCTGTTGTGTAC
2744	TGCAGGAAGTGAGGCCGGAAAAAACGCTCCTGGGTTTGTTCGCTCTCCACCTCTTGGATGCGAGCTCGCACCCTGGCGAAGAAGAACGGGTCACAG
2746	TGCAGGGCTCGCTGAGCCGGAGACGAGTCAGACCATCAGAGACGGAGCGGCGCCTGTCCGTGGTGTCATCATTGAACGAGTGGGAATCCTGGGAAG
2757	TGCAGGGATTTCTGGGTTTCCTCCCAGTGGGACAAGCCCGAAAAACCTCCACAGGGAGGCGTCCTGATCGGATGAACCACCTCAGCTGACTCCTTT
2759	TGCAGGAATATTATAATATTTCTGCTGGAACAATCTAACTAGCTGTCTTGCACAAAGGGTATGTTATAAATTATCGTATGTGGTTTAAAAAAAAGC
2761	TGCAGGACTGACTCCAACCTTTACCTTTCAGATCAACGACTCAGGTCCAAATAGATCCTGCTGGACACGAGTCAGAACCCAGCTGTGGAACCAGAG
2769	TGCAGGTCATTTTCTTTCTCAGTTTTGTTGGATGACCTATGAAAAGCATGCACTTATTTGTTTTAACCGTCATGTAAATGCTTGCAACCCTAGATC
2787	TGCAGGGATAAAATAAAATCTAATAACGGCAGCAGCTTAAACTGTTGGCTCCTCAGTTTTGGTCAACGAGTTCTGCAGGTGAGATGTTAACTGTTC
2791	TGCAGGACGACAGAACAGTCGTCTGCATAAAATCTTTGTTTTGGACCACAGAACCTCGACTCTGGTGGGACTCGAACCCACAACCTTTGAATCACT
2804	TGCAGGCAAAAACAAACAAAAAAAAACAAACTATTAATTATTACTCAAATATAGAGAAAGACATCTATATATTTTCCACTTAAATTAATGGAGACC
2810	TGCAGGCAGATCCGTGGAGGGAAGAGGAGGAAATCGGGTTTTTTAGGGTGAACCACAACACCGAGGAATGTGTAACGGAACGAGGGAATAAACATC
2819	TGCAGGTGGACAGACATGTTAGATTTTAATGCCTGAAACACACAGAAACACTTTCAAAAAAACTTCTCAGCATGAGATGATCTCAGTTCCAAAGGT
2821	TGCAGGCATGTTGCCGTGGCGACTGGAGTAAAAAGGGGCGGATGAAAAAGCAATCCTCTCTCCCATCATCCCTCCATCCTGTGGCTGTCCCACCGC
2824	TGCAGGAGTTCGGGTCCTAAAGAAGCGTTCAAAGTTAGAAGACTGACAGATAAGAAGGCAGCAACTCGTTTAAAGAATTAAAAGTAAAGTTATGGT
2828	TGCAGGGATGAAGGCTGCAGTTCTGGGGGACTTCCTGGTGCTGCCGTGGCCCAGCAGCGGATCAGGACCAGGGTTCGTGGAGGACGGGCATGGAGG
2839	TGCAGGCTCGCAGGGAGTTGGGGTCTCCAGAGGTCAATTAGGTGATATTATTCTGGCTCTACTCCTATTCCTAGTGTCCCTGTTTGTGTGTTTCAG
2840	TGCAGGACGAACAGACCAGAGATGAGCTTCATCTTTATACACCAGAACTGTTCTGATGGAGGCGGGCTGAGAAGTACCAAACTAACGAGGTTTACT
2841	TGCAGGAGATTTTACTGGTTAATGATGATCGGCTCTGATTAATGACAAGATCTCCCCAGATTCTGGCATTTACTTCAATTAATCTTTGAAATGAAT
2844	TGCAGGAAAGAAACATTCGATCGTCTGTTAATCAAAGCAGCTCTCAGTGCCTTATAACATGTGGCAGCCATTTGATGACAACGTATGATTCATCTT
2847	TGCAGGGGCTGGGAACGCAGCCAGAGCTCCTGCTGTGGCAGAGAGGGGGGAAAGATGAGGGTGGAAAACAGAGGAGTTAGGACAAACAAGAGAACG
2858	TGCAGGGAAACAGAAAGATGACAGCTGGCAGGTGAGTAAAATACAGCTGGTTTAAAGACGACTGATCCACCTGAATGTCACAGTTAATGAGGAAAA
2865	TGCAGGTAACCGTGTCACGTTCCATAAATATTTACAGTCCTTTTTATTAATAGTCCTGATTGATTATTTTCCATACACTTCTCTCTCTTTTTTAAA
2871	TGCAGGGTTTCCTTGTTAATGACCAATAACCAGCAGCACACAGGCTGCAGTGCGATGCTGTAGGAATTGATTGGTGCTGATTTTTCAGTGATTTTG
2876	TGCAGGCCACCGTAGTGGGTCAGTAGATCCTAAATAGATCCTCTTAAAGGATTATAGTCTTCTTCTCTGCGGACTCACCTGCTTCAGGATGATATC
2880	TGCAGGAACGTCATAATATTCCTGAAAATGCCCCGCGAAATCAGGCATTTTAGCCCGCAACAATCACAAAAAACGCCCGCGAAATCCTGGAGGGAC
2883	TGCAGGCTTGTGCCTTGGGAGACCTCCGTCTTTGTAAGTATTGGTGTGCTCTGGAAGCACTTATGCATATGTGCATTTATGTACCAGATAATGTTA
2915	TGCAGGTTCTGTTTCTTCTTGACAGATTGTCTTAGTGCTTTGGTTCTGTTTCCAATTCTTTTTTACTTCATTTGATTCTTAGTTATTGACTTCTGG
2919	TGCAGGGTAGCGGCCCTCCAGGACCAGGATTAGACACCACTGGTCTAAAACATTAGCAAGACAGGCAGCGGGCGATATGCATTCCTTCAAGAAAAG
2925	TGCAGGCTGTTTACAGAACCGATCAGCTAACATCTGCTGAACTCCAGCAGAGAAACCAGTGAGAACAGTTCCAGCTGTTGTTCCATCAGCAGGGAG
2928	TGCAGGATGGAGGCCCTGAGGACCAGGACTGGAGACCACTGAACAGTTTTGCAGCTTTTAGCTGGTTTTCCTCCTTATTTTAGCTTTTAAAAAACT
2934	TGCAGGACAGACGGAAGTTTTATTTATTTATTTGCTTCTTTGTTTCATGCTGAACATATTGTTCATATAAGTCGTTTGCTCAGCAGAAACAGTAAA
2939	TGCAGGTTTTAGGCGTTTCTCTGCTTTGAATGACAGAGTGATTAACAGGATTCTGAAGAACTTGAACACCTGCTGAGGAGCAGAGAAACATCAAAA
2944	TGCAGGATGCGCGTGCTGCAGATGCAGCCGCAGCAAAAAGAACTGAGTCATTTTGTTTGGAGAACCACAGGTTTGTACAAACTCAATGTTAGATCC
2945	TGCAGGAAAAACTGCAGCTTCTCGTTCGCTGGAAACAAAGTGGACATCAAACATGAATGCGTGGATAGAATAGTGTTGGATTAAACCGGAGTTTAA
2946	TGCAGGTATGATCCCAAGCAGAAGAAATAAATAAAAAAGGGCCGTTTTAAAGAGATATTGTGTAAGAGTATTTATTATTATCAACAATTGCGTAAT
2960	TGCAGGCTGCGGTGGCGTCGGTCGGACCCATCGCCGTGGCCGTGAACGCCATGTTGTCTTCTTTCCAGTTGTACAAAGGAGGTGAGTCGAACGGCT
2961	TGCAGGATGAACCACACATGTCCTGCACGTCCTGCACATGTCCTGCACGTCCTGGACATGTCCTGCACGTCCTGGACATGTCCTGCACGTCCTGCA
2972	TGCAGGGCTGGGGAGGAACTAATTACATGTAACTAAACTATCCATCCATTTTCTTTACCCACCTCTCCATTCCGTGGGAGCTGGTGCAGTTGAGAG
2980	TGCAGGCCCTGAGGCTCGTGGGAACATTTCACGCGTCCTGCCTCAGAATGAACTGCGGACTGCAGAGGCTCACTTCCCATTTCAACCTGTCTATTT
2983	TGCAGGCCATCGGCATGTGAGACACCTGAGACAGCCCACCTGAGCTCAGGGCAGGTAGTTTATAGGAACAAGTAGCTGCCAAAAAAAAGGTAGTTT
2984	TGCAGGTGCCTGTCTCCAACAGTCCCTGTGTAAGAGGCGGGGGACATCCTGGACAGGTTGTTTGTCCATCACAAGGACACATTGAGACGAATGAGA
2987	TGCAGGGCACAGACCCAAAACAATCACATCAAAGCTGAAAGAAGGACATTCAGCTGAAACATGTACAATGGGATGGATAAAATATGATCAAATCAG
2990	TGCAGGAAGTGCTACAGCTAGCTGCTGAAGGATTTAAACAGGTGTTTCTCTGGTGTCTCTGGTTTCTCTGGAGGCATTTCTCTGCAGGACAACGAG
2997	TGCAGGAGCACGATTGTTTTCATGTGAGTCGTGTTGTCATCTGATGACAGAGAGCTAAAGATGGAGAGCCAGAAAACCGAAGAGGCAGAAAGATAA
3000	TGCAGGCAGCGAGCGTCCTCAGGCCCCCCCGTTTAAATCCCCACCTGTAACAGATGTGAAGCAGCTGTTTTACACGTTAGCCGACTTTTTTCAGAT
3004	TGCAGGGCCTCCAGTGGTACTTTTGGTTCTATGAACACTTTCTGTGTATTTACAGACTGATATAAACAGAACATGATGGTTGAATTGTGGAAAAAC
3015	TGCAGGTTTGCAGGAGCACACGGAGGTAAAATGTCTGAGGCAAACTGCAGCAGCGCTCACTCTCCACACCCCCCCAAAAAACAAAGGCTCAAACCT
3018	TGCAGGGTTAAATTCAAACACGCCTAGAAAGGAAAGTCCAACTTCATAAATAAGAAATCAGCTATGAAATCTCATCAGTTTTCTATGTTTTTAAAC
3022	TGCAGGGACGCAGCTTCACACCTGAGCCCAGTTCCAGTCTCGGACCCGGACCGTGGCCTCAGGGTCATCTGGGAGCCATCTCCTGGATCATGGCTG
3026	TGCAGGGGCAGTAGTCCAGAACCCCAGGAATCAGGGGGGACCCCGGAAACAAGACCATTGCTTTTAATTTTAATTTTAATTTATTTAAGCTCACCT
3030	TGCAGGAGCGCAGCCAGCAGCTGAAAAGAGTGCAGGAGAGGCTGAAAATAGTTGCAAGGGGGCCGGGAGATGTGCAGGAAGCGGGTGCTGGGTCAC
3031	TGCAGGAGACAGTCAGTAATGTTGGTGAGGGGCAAATATGGGGGAAATCTCTATAGTGGGAGCAAAGCAGGATTCATTTGCTGGTGAATTAAACTA
3052	TGCAGGTACGGAACAGTTACACGGGATTAAAGTGACAATCTGCAGGTGTTCTTTGTGAAACGCTGATCTTAATGCTGACGCACACAACAATATTAA
3056	TGCAGGTCTCTACTACTAACCACTTGGGTTTACTGAAATAGTTTCTTAGAGATATTTTCAATTAGATGTATTCCATTGAATTTCATTGTATAATGA
3059	TGCAGGTGTCCAAGTACAGCTTCTAGAGCTTTGGGACAGATTGGAGACTTTGAGACTCGTGACAACTCTGTGACTTTTTTTTTAAAGAGACGTTGT
3064	TGCAGGATCTGACATGCGAGAAATGCACCTGCCCGTGTCTTTGCGTTTATCTGTGGTGTTAGCAAAATATCTGATTAAGCATGGGACGGATTTCAA
3074	TGCAGGATGGTGGCCCTCCAGGACCAGGACTGGCTTAAAGGGACTTAACGACTAGAAGTGACCGTAGGGTTAAAAAGTTTTATTCTATGAAAAAGA
3075	TGCAGGTAAATTAGATGTAATAATCAGTTTTAATATTAACAATAAGGCACAATGACATCAGGTTTTAAATAGTGATGTGTTGGGGTTTTTTTGGAG
3088	TGCAGGGAGAGCCTCTGGCTGCAGAGGAAGTGCTACAGTCAGCTGCTTCCGCTGCTCTTAGTGTTTGCACATCACCATGGGATTCTATGTAAAGAA
3101	TGCAGGGCTGATCTCGTCTCAGGTGCTAAAGAAGTTAAACGGTTGAATAAACGGGGACGTGTTTCTCCAAATATAAAGAGGATTTCAGAAAAACCT
3109	TGCAGGATGGAGGCCCTCCAGGACCAGGATTGGACACCCTTGTACTACCGCCTCCACAGCACGGTTCGGGTGGTTTTCCACTTCTGTACAGTTCTA
3112	TGCAGGCAGATGATCCGCCAGCGCTGCCACTGCAGGATCAGCACGCTGTTCGTGGAGTGCACGTCAGTACGCACACGCACACAGACACACACACAC
3115	TGCAGGTCGCCTGAAGGTGGAGGTTTCTGCGTCAGCTGACAGGTTTCTGTCTTCTGTAGGACGAGCATGAAGAAGCGTTACAGGGAGCTGTACGAC
3116	TGCAGGATGGAGGCCCTGAGGACCAGGGTTGGACACCACTGGTTTAAAGGTTCCCATGGGGGTGGGGGCTTCTGCAGGACTATGAGCTACTCTGTT
3128	TGCAGGTGAAAGCCCGGAACAGCACACCTGGCTGAGGTGCAGTCACGTGGCTCCAATCAGGACTTCAGAGCTTCGTGTCAGAACGCTCGTGTTGCT
3130	TGCAGGTGGAGAATGTCGCAGGTGTAAAACAGAAGGCAGAAATAAAATAAAATCAGCAGTGCAATACCACCTGAAAAGCAAAGGAATTTTAACTGA
3133	TGCAGGACAAGGCAATACGCACACACACGCCACACATCTTCTCTGTTGTTTCTTGTTTTTATTTGAGTCGTGTAGGAAAATGACTGAGGGTGGCGA
3139	TGCAGGTTTTAGAAGTGTAAAGTCCCGTCTCTCTGCAGTTTAAACCTGCTGCGCTGCTACACAGCGTCTTATGGTTGTGCATACAAACAGGGATGG
3142	TGCAGGAGCTTCTCTCTGCACCCTCCAGCAGCTCACTCATCCTGAACGGACCTACTGGTTCTCATCATTTACAACACAGGAACACAATGTAGGAAC
3144	TGCAGGTAAGCGTGCACCCACAGCTCAAGGAGCCATTCGCGAGCAGGAATGCCGCGTTCTGTGAACAGCTTCTTGGAATGCTGACACACCACATCC
3153	TGCAGGTTTCAGATGTTTCTCTGCTGCCACACACCTGATCTGAATGACTGAGGCATTAACAGGCTTCTGCAGAACTTGAAGACCTGCTGAAGAGCA
3163	TGCAGGTGTGTTCGCAGCACTTTACCGTATTTGTGGTCAAACCTGGTCAACATGAAACAAAAATAATTCTGCTTTTAGGGCGTTTAATTAAATGTC
3176	TGCAGGATACGATAAACACGGACGTGTTCTGTGGGAACATGGTTTCGGCTGTAGCAGACACAGAAACATGCAGTTTGTGCCAAAAACCATCAGCAA
3196	TGCAGGTTCTTCTCCTCCAGCGCGATCATCACCCTCCAGCAGGGGGGAGAGCCGGAGCCCCAGTACAGAGTCATGTCCTTGGCCATGGTTTCCAGC
3203	TGCAGGATGCAGCGATCTGAGCTCAAGCTGTGCGACCCGAGAACTGTAGCATATTGGAACCAACAGCAAGTGATAAAATCTGTGTTTATGTTTAAC
3204	TGCAGGCCGCGAGGTGGAGGATCTTTGTCTCAGCTTCTCAGCTCTTAGCCGCCATGCTAATGGCTTTAACCTGTCACAGAGCGCCGTAATGATTTA
3205	TGCAGGCGGGCTGTGCGATACAGAGGCATGGGGAATGGATCTGTGAAGGGGCTTCCGCAGTGGATGTAGGACGCCAGCGCCTCCGGCGTGGGCGCC
3210	TGCAGGGTGTGTGTGTGTGTGTTCAGCTCCTTGCGCTTTGCTGACTTTTATCAACATCTTTTTTTTAGCTTCTTGTCACTGAAAAGCTCTTGTGTT
3212	TGCAGGGAGTCACACGGCCGACGTCAGTATGCGGTGCAGCCATTGGACACGATGGCAAATCATTGTCAGCATCTGCATTCACGCACATCTAGTCTA
3213	TGCAGGTCCGACTCCGAGGGAAAGGTCCGCTGGCACACGGGGCAGCAGGGTTCCCTCTCCTCTGTCAGTTGGCTAATGAACTGGGTGTAAACTGCT
3220	TGCAGGTCCCTCTGCAGCAGACTGTGTGAAGCCATGCATTTTAAAACCCTGTAGATTTTTTTGGTCTGATTATAGATATTCTTCCTTTAAATGTTT
3222	TGCAGGTTTATCCTTCAACTTCTGCATCCTGACGTCTTCTCGGTCGTTTTTGATTAAATTATCAGTTCCAATTCCTTCACTACAACATATCTTAAG
3227	TGCAGGATGTGGGAATAAGTGGCCGTGTGCTGGGAAACCTTTATAGATTAAATGTTGTAAATGCTTTTGACACCACTAACGTGATTCTAATTATAA
3228	TGCAGGACGTCTTGAAACTGTGGGAGAGAACAAATGGTGGTCTGGGTGGCTCACCTGGCTCAGAGTCAGAGTTCCCAGTTGGAGACTGGCAGAAAC
3229	TGCAGGAAATGCTATTCAGGCTTTTGGTTATGGGATAGACATCATACCAGGCAAAAATGTGACTGTCCCGAGCCCCTTGGCAACATCGCCCGACTG
3233	TGCAGGCGGAGGTTCGCCTTGTGAGGAGAGAAAAACAAAAGACATTCACAAACAAATTCACAGCGGACGACAAATAAATCTGACAAGCTGCGCACT
3237	TGCAGGAGGCCCGAGGAGCCGGCCGGGGCTGCGGAGACGCACAGAACCGTCGTTTTAAATTTAAAAAACAAAACTATTAGTATAAGTTTGAATGGA
3240	TGCAGGTAGGATGTTAACTGTTCCCAACCTTTCCACGGAACCTCACCTCGCTACGATCTGGACTGTCCCTTTTTTAACGCGGTTCCAAGCAGGAAG
3245	TGCAGGAATATTTTAATATTTCTGCAGCATAAATACGTGTCGAAAAACCAATGGCAAATGAAAGGTTTATAAAATGGCGTTCTCATGAATCATTGT
3246	TGCAGGGCAGATGGGCAGATGAGTGGAAGGAGGCTAGGGGGAAGGGGGGGCACAAACGAGGAGAGGAGAGAAAATGATGAAGACTGCAAACAGGAG
3260	TGCAGGAGCCCATGGTGAGACACAACTTTACAGTTTAAGTATTTTCTTTCTTTGAGGTGCTTTTTTTAGAAAGTCTTCTTGAATATTAACAAGTTT
3264	TGCAGGACAGTTCCGTAGAGTTGAGCAACTCCGAAGCTTCGTTTAGAAAATGAAAGGAGGTGCATTCTTTATTTGCTACCGTGAGGGCCACACGAA
3267	TGCAGGCGGGCCCTGCAGCCAGGCTTACCAAGGGGGTTTGGAGCGACTCTCAGCCTCCTTCCATCGGGCGACGCTCCTGCAGCGAGAGAAGCAACA
3269	TGCAGGTTCTGGAGGCTCAGCCTGCTCCTGGCGCCGGCGGCGGCGGCGGAGCTGCAGGCGAGGAGAAGACTCAGACTGATCCCAGCACTGCAAAGG
3270	TGCAGGGTCTCACCTCCCTCCGCTCCCTCAGGTCTTGGCGAAGAAGGCGTGAGTCAGAGCTTTGGCGGCAGAGATGCGTCGACTCGGGCTGAACGT
3280	TGCAGGAACAAGATCCTCCTGAGGAATAGAGAGCACACAGGTTCAACACTCAGGTGGGTCACATGAGGCCGTTAAAGGCTCCTTGGTTAAAGTTCA
3288	TGCAGGTGTTTGACTGTGAAGACCACGGGCTCAGACAGATAAACCTTGTTGCTCTCTTTGTTAATTGACGCCATGATGACCGGAGAGTTGACGATA
3289	TGCAGGGTAGCGGGGCAACTGGTGGCGCAGTTCACCCTGGACAGGTCACATGTCCATCTCAGGTCAGAATTTATTTGTGAACCTTAGAAAAACATC
3303	TGCAGGACTGTATGACATGATGGGAAACACGTGGGAGTGGACGTCCACGCGCTTTCCATCAGCACAGCCGATGTACGTGCTGCGAGGCGCCTCCTG
3304	TGCAGGAGGAGAACCGGAGCCTGGCTCGGGACAAAACCAGGCTGAGCGCTGAGGTTGAAACGGTGAAGGCTGAGCTGCAGCTCTGCAGACGGGCTA
3305	TGCAGGTAAATGTTTGTTTTAGTACCTTTTTGTAAAACTTGAGAGACAAATACTAGGTATTTGAACACAGGAGATAGCATTAATAGAATATTAACA
3309	TGCAGGGTGTCAAGTCTGATGAGCCATGTGGAGGCCTGGACTGCAGTGGAGGGTGTAAGTGCTTCCCAGAGAAAGGCAGCAGGGTGAGTAACAATA
3311	TGCAGGAAGGGGATTTGCTCCCCATCCGCAATTGAAAGGATCGCCTTTCTTTTCTCTGCCCTGCTCTTCCACAGCACTTTGTCATGTAAAGAGACC
3313	TGCAGGCGCACATGATGGCTCGGTGTGTTCTTGCAGAGCTTTTACTGTGGGTATTTGAGTCCCATGGTCATACCTATATGCATGTACAAGCATTTC
3323	TGCAGGTTTTAGGTGTTTCTCTGCTTTGACGCATCTGAGTGATTAACGGGCTTCTGTAGAACTCAAAGACCTGCTGAAGAGCAGAGAAACAACTAA
3337	TGCAGGATGGAGGCCCTGAGGACCAGGATTGGACACCCCTGATCCACACCGGGATGGAGGCAGTCTGACAAATATTCCTCTGCTGGTCCGAGCTGA
3345	TGCAGGTGGGGGATCTGTGACAGGTGTGTGGTGGAACAACGAGTCTAATGCAGCTCAAACCAGCCGCCTGCTTCTCCTTTCAGGTGTTAACCTCCT
3348	TGCAGGTAAGATAGGTAAGTCAAAACTTGACCAGGTCAAAGCAGGTACACAGCACTGAAACAGCTGGAGCACAAACAATAACCTGCTCATGTGATT
3360	TGCAGGAAAACACGAGGAACTCGGATTCTGTAGAGACCGTCAACTGCAGCCACCTCCTGAGGAGAAGAACAAACATCTTACAGATGAAAACGTCTG
3365	TGCAGGTCAGCCTGACTCGCGCTACATTCGGGTGGAGACGTGTATGTTCATGGTGAAACTGCCCCAGTACACCTCTCTGGACGTGATGCTGGAGAA
3369	TGCAGGATGGTGGCCCTCCAAGACCAGGATTGGAGACCATTGCCCTAGGGGACACTCATCTTTTATGGCTTCAACTTCTGTGTCTAGTTATGATGA
3371	TGCAGGCCTTCTTCGTCCTCTCCCCATACCTCATCGCCCATAGTCCCATATCTCCATGGACTTTATTACTGGAATACCACCTTCTGAAGGTAATAC
3383	TGCAGGACTATCATATCTAACCAGGTAATGTGAAATTCACTGCAACTGGAACACAACTAAAATAGAGTTCACATCAACGGCCATGAAACTTTTGAG
3395	TGCAGGTAGATGATGCTGATGGGGTCAGTAGGCAGGTTAGATCTCTTCCTGCGGTTTGATTTGCTGTAGTCAACTCGACACTCATATGTTCCAGTA
3400	TGCAGGCAGCAACAGGTCTTTCAGGGTTAATGTCTTTTGCATTTTATCTCTTATTCACCTTTTAGGGCGTTTGTTGATTTTAGCTTGGCTTTGAAC
3415	TGCAGGCCTGTCCTGTAAATAAAATAAATCTTTCTGTCTGCTTCAAGTTAAGAGGAGAAACAGCCAACTGCCAGGGATTTATGGAAGCTGAGAGTC
3417	TGCAGGTACGAGCATCACAACAACCCCTGAAAACTAGTGAGGAGACTTAAACAGGATCCAATAAATACATAAATAATCAATAAATAAAGTCAGAGC
3428	TGCAGGTATGCCGTGAAGGGACCTTACCCAACAACCTAAATTGGCGTCGGTGGTGGGGCCCATCGTGGTGAACTCAGAGTCTGTTTTTTTAAGGGG
3429	TGCAGGGGGCCATCAAACACAGCGTGCTGAGAGACCGGGCAGCATCTATTCTGGATTCTGCTGTGTGTCAATGTTTGTGTGTTGTCAGCATTTAAA
3432	TGCAGGTTGTTCCGTCAAACATGCATGTTCTATTCATTCAAGCCAAAATATCTGCTGTCAAACAGTCCCATAGAGCCTAACATTTTTTTCTGCTAG
3439	TGCAGGAAAATAAACAACAATGATTGCACACTTGGGTGCCTTTTGTGAACAGTAAAACTGGGAGCTTTAGTTTGTTGAAATCAGCTAAATTCAGCT
3446	TGCAGGACGTGGCAGAAGAGGAGGAGGAGGAGAACCTCCTGCGGCGCCCGGGTCAGCTCTTCAACCCGCCGCTGGCCCACTGCGTGTCCGTGTCCG
3449	TGCAGGATTGCCAACTTGAATGGGTTTATTTTTATTTTATTTATTTATTTTAGTTACTGTCTGCAGATTGTCTGTTCTCCTCAAGCCTGTGTTTTA
3454	TGCAGGAGGAACGAGGAACAGCAGCTGCTGTTCAGTCTGCCACAGACAGTAATCAGATTACTCAGGGGTGAGGGGAACAGTAATCAGATTACTCAG
3455	TGCAGGACAGATGTGTCTGCAGCAACACTGTTTAAAAAATGGAAAATGAATAGAAAATAGTGACAAAGTCGAAGACAGAAGTCTGAATCCTCTGCT
3457	TGCAGGAGGATATATCCGATATGGCAGCTGCTGATTTGGTGATAAGCGTTTGGCTGGCTTTCGCGGAGGAGGAGGCAAGTGTTTGTGTCTAAATCA
3459	TGCAGGGAGAAGACTGAAGCCAGGTTTCTGTAATCAGGTATGATCCGGATCACCTGGGAGAGAAAAACCCTCCACCTGTGGAAAACAGAGCCCTCA
3463	TGCAGGATCGACAGGAAAAAGGATAAAACAGAGAGAAAGATCCTTGACAGCCAGGAGAGAGCCTTCTGGGACGTCCACAGACCTGTGGTAAACCTC
3480	TGCAGGTCTGTGAGACGTAACGGGCGAATGGCTGGGCTTGCCGCTGCCTGCCTGCCGCCGGCTGAGAATGGCGCTCCTGTTCGCCTCCGATCCGGT
3483	TGCAGGCAAACTGCAAGACCTGAGAGTCTTTTTTCATCAAAAAGTGATGAAATGTAGGCTGTTCTCCATGAGCTGAAGAGAGACAATGTAATGCAA
3499	TGCAGGAGTCTCCAGCAGCTCGGCTTGCATCAGCCCCAAATCAAGTCCCATCGGAGAGAACCGCCGAGACAGCAGAGACTCCACGGTACTGTCGCC
3505	TGCAGGTGGATTATATTTAACAAATTATGGATTCCGAAGACAATGATTGGGGTTTCAAAGTGTAAGGAGTGAATACATATGAATGCACCACTTTTC
3508	TGCAGGCGGCCTGATCGGTTATTTATAAATTTCCAGTGGTTTACACACGTTTCAACTCTGATTTGTTCATCATCAACAAACTTTCTTTGTATCACC
3515	TGCAGGATGGTGGCCCTCCAGGACCAGGATTGGACACTACTGCTTTAAAGGAATGATCTCACTTTTTTTAAAAAGTGATGTTCTGTTAAATAGTTA
3517	TGCAGGATGGTGGCCCTGAGGACCAGGATTGGACACCCTTGACGTACGCAGACACTCTTAATGCTGTGTATCATATTTGAATCAAATAATAATAAC
3520	TGCAGGCAGAGCAGCTGGGCGGCGTTTCAGAGGAGGAAGACCCGACCCGTGAAGCCGCTTCTCCCGGAGTGTGCGTGTTTCGGTGCTCCACTCGAG
3531	TGCAGGAGTTACAGGTTTGGTTTAAGCATCACCAAGTAAACGAGGACAGACTTTGTTTGTCCTCGTCCTCACAAACCTTCAGCTTGTTTACAGATT
3552	TGCAGGAAGAGGGTCACTGAAGTCCAGGAGTTCATATAAAATCAACAGAAAGACTCGATGTGTTCATCTGTGGTGTGTGATGGCGCCCTCCAGTGG
3574	TGCAGGTGCCCCAGCTGGTGGTCCAACAGCGCCTGTTGAACCACCTGCTGGGGCTCCTGCCGGAGCTGCTGCAGCTCCAGTAGCTCCTGTAGCTAC
3575	TGCAGGACGGTGGCCCTTTAGGACCAGGGTAGGAGACCCCTGATCTAAGGTAAAAGCAGAAACAAGTACGTTGTTGAAAATATATTCTGTTTAAAA
3581	TGCAGGTTTTACTTGTTTCCCTGCTCCAACACACCTGATTCAGTGGTTAAATCACCTCCTTCATGTTCTGCAGAAGCCTGATAATCACCCACTGAT
3584	TGCAGGACTCTGTTAGCTGGTACTGAATAACCTCTCTGTAGATGATCTTAGAGCCCTTCTTTAACCAGCTGAAGTTTGGTGGATCGAGGACGAGCT
3585	TGCAGGACGTCTAACCTGACATGATGGACATCCTTTCACCGGTTTTGGCCGAGAAAACGTAATCAACACTGACATAAAATTCATTTACCCATATTT
3592	TGCAGGGAGAAATCTCTGTTTCAACAGCTGCACTGCAGTATGAAGGCTCCCACACCACTCCTATAGTTCCCCTAATGAAAAATAATAATAAAAAAA
3595	TGCAGGATAGTGGCTCCAGGACCGGGACTGGACACCACTGCTCTAGGAAACATACAATAAAGCAACGATCGTTTTAGGGAAAGCCTTAAACACAAT
3598	TGCAGGAACTAATCCGTCCGGGCTTTACGGAGGTTTACAAGGATTAGGTTGTTAACGCCGCACAAACACTGATGCTCGATAGTATTTACTGCTAAA
3605	TGCAGGGGACGTCGGCTGTTCAGCACCGTCTCCCTCTCAAGCCAACGATTGAAGTGTGAAGCGGGGGGGGCACATGTCATCACCTCTGTACGGTTG
3609	TGCAGGCCGAGAGAAATGCAAGTAAACACAAGAAACAAAAAGGCCCGCCGGCTTTCATGAGAGGTTTTGAGTCTAAGACTCCGTTCACACTGCAGG
3611	TGCAGGCTCCTCTGTGCTGCTCACCACAGCTGTGGGATTGACCACAGGGATTTCTGAAACACACACAAGTAATACAAATTTAATCTATGGGCATGA
3617	TGCAGGAGGCACACACAAAGGAATCCCAATAGCTGACATCACCGCAGGGCTACACATGTCACACAGAGGAAGGCAGCGGTTCTCGTTAAGCCCCCC
3619	TGCAGGATGGAGGCCCTGAGGACCAGGACTGGAGACCCCTGGATTAATCCCTCCGGAGAGTCCTGGGTCTGCCCCAGGGTCTCCTCCCCCCACCTC
3622	TGCAGGATGGTGGTCCTGAGGACCAGGATTGGACACCCCTGCCTTATGGGCTCCGTATGAGACACTTAAAACCCTGGGAGCGTTTCACTTTATGTA
3629	TGCAGGGCGGGCTACCTCACGCTGTTCGCCGGGGAGCGGAACAACAACGGCCCCGGGGCCTCCGAAGTCTACCAGGAGTACAAGGCGTTCGACAGC
3637	TGCAGGTTGGTCTCCAACAGCCTCGCTCGGCATCGCCACCTGCGGAGGCGTCATCTCCACGGCAACGGCCGACAGAGCGGCCCGGCTCGTCTTTTC
3641	TGCAGGGAAAAATAACTAAATAACTAAATAACTAAATAAATAAAAAAAATAAAAATAAATAAAAGCTGGCAGTGCTGTAGAGCACCAACAGATAGT
3645	TGCAGGGGCAGGGACAGCATGATTGCGTCATTGTTGGTGCGCGCACCCTCGCCTGGCGAGGTAGATAAAGGTAGCGGTTTTGGGGGTGCGGGTGGA
3647	TGCAGGTTTCTGTAACCCTAGCCTTCCACACATCACTTCTTTGGCAGTTGACAAGCTATAAGTGTCCCACAGTAGCCTTTTCTGTGCTGACAACTT
3650	TGCAGGCAGAATTAGTCATTATCTGATTAACAGTTTAATCATTCATGAAGCACATTGGAGTAATCAGATGTATCAAAACCCATCAGATAAAAGTAC
3655	TGCAGGAGTGAAAAGGAGATGGAACAAAACACTGGAAATTCTCACAGTAAAAGCAAGAATTGTTGGTAAACCACTGCAAAATATATGGCTATTATA
3657	TGCAGGTGCTGAGTGTTACCTGGGCGGAGGGCAGCTCTCCGACTCTCCTGCCGCCGCTGAACGGATGGACTCCGGCACCCGCCGCCACCGCCGCCC
3658	TGCAGGGCTCCACGAACAGCGTGTGGACCTGAGCGCGCGGTGGAGGCGTTTATACTTGACGCGAACACAGGCGGACCAGCTCCACTAGAGCACCGA
3661	TGCAGGACTCAGGAGCACCCCAAGGCTCGGTGCTGGGACCCCTGCTCTGGGAAACATGCAAGAAGGAACCTGTCCGGCTCTTAACCTGTATTTATC
3672	TGCAGGATGGAGGCCCTGAGGACCAGGACTGGAGACCACTGGTTTAGGTTTTGAGCTCCATCAGTCTTTACTCCCCTCGTACATTTCTTGATCAGC
3673	TGCAGGATAGAGGTCAGAGAAAAAGTGGGAGTCACACTGTAGAACAAGAAGCCGCAGAAAGCCTCCGAGACAAGAAAGATTATTCAGTAAATTGTA
3675	TGCAGGTTACTGTTTGGTTCTGAAGCATTAAACTCCCTGTACACAGACAGCAACCAGGTAAACCAGTCAGTAACCAGGTAAACCAGTAAGCAACCA
3698	TGCAGGCTCCTCGCTGCTCTAACCACTGCGCCGTGTTTATCTGTCACGCAGGCAAAACATCTCGTACACCACTGAACGGATCACTGGAGGTGCCTC
3710	TGCAGGCTCCAAACGAACATTTGTCACCACATTCTGGGCGAATCCAATTAAGGCTGCCATTTTTAAAGCTGCGCTAATTTCAGCTCCACTAAAAAA
3724	TGCAGGGCAACGACAGCAGGACACATCACCACGTTAACAGCCTGTTGGAGTCGAGCTGGAAGCAGGTTTCAGGTCAGCCACAGAGACAGGAATGTG
3727	TGCAGGTCCTAAATCATTTATAAACAAACATCAGTCAGTTTTAAAATAAAAATTTGTAGCATGTTTGTTTCATATGAAAGCTCAGAAACAGGTGTT
3734	TGCAGGATATATGAAACATGCTTAATTGTGTACATGTGTATGATAATAAGTTAATTTTACAGCTCACTGTGCCCCTAACGAATGTGTATAATGTAA
3735	TGCAGGTTTCAAATGTTCACCGAAGTTCTGCAAAGAGGACAAAGTGACCGGCTCAGACTGTTGAAGACACCAGAGTGGAGGACAGGGACTGAGGGG
3736	TGCAGGACGGTGGCCCCCGAGGACCAAGATTGTCCGCCCCTGGATTGTCAGGTCTTTATTGGTCAGCAGACCCCTGATTGGCTCGTTTTTCTTCCT
3739	TGCAGGGCTAGTTTACCCATGAGCTGATGTAGAATATTTACTTCCTGTTTAGTTTTTGTGTTCCTGAAATGATGCGTTTCATCAATTTTGATGTGC
3754	TGCAGGATGGAGGCCCTCCAGGACCAGGACCGGAGTTAAACACGTTAATCTCGTTTCTGTTATCAGGGAACTCGTGTTGTTCCCTGATAATTAGAA
3756	TGCAGGGTTTAAGACGCTTGTTTTCATTTAAATACAACAGAAAAACAACAAACTCAGCGGTTCTCACAGAACCATAGGAAGGTTCTGTAAACATCC
3763	TGCAGGTAATTGACCAGCCTTCTGTGAGCAGCAGCAACATGGAGCAAGTCCAGTGCATCATTGTCTCTGTTTCCATTTTATTTAGGAATACAGATA
3765	TGCAGGCTCAAATAACTTTGTAATGCCTCACATGCCAGGCTGTCAAATGTTGAAGAATGAACAATAGTATGCCAAGCCTCTTTGAAATAAAACTGC
3769	TGCAGGTGAGGCGGCGCCGGCCGGGCACCATCTTTGTTTTCTGATCATTTCTCCACTTTTTACACATTTTTCCTTTAGAAACAGACAGAGCTGCTT
3781	TGCAGGGTCTGTTCTACAGCAGAGAACTCTGTTCACGACTGGAGCTCTTCACCAGTCGCTTCAAGGTGAGACCGCCGCTGCTTTCATCCGTTTTAC
3784	TGCAGGGACGGATTCACTTTAAACACAACTTAACATCAACATGGCCGCCTCAGGGTGTGCGGCTTCCACTCTGATTAATTCTGGGATGCAATCTGA
3788	TGCAGGAGGTTCTGATGTTCTCTCATCTTTTCTTCCATGGCGCCAACCAGCACGTTCCTCTCGTACTCGAGCTGCTCGATCACCATCTAGACACAG
3798	TGCAGGACGGTGGTCCAATCCTCCAGGACCAGGGTTGGAGGCCACTGATCGAGACCAACATCAGGATAAACACCTAAAGCAGCAGATTGAACGATA
3799	TGCAGGAGGTTCGAGAAGAGCCAACGGCTCCGCCCGTTTACCAGGTGGCGGTCGGCGTGTCGCACCAGGAGCGACCCGATCGCGCGCAGACAGACG
3805	TGCAGGACTTGTTTGCCGTGGTCTCAGTGTTGAGTTGGTAAAATGTTCAGTGTCTGTTGCAAAAAGGATCGTCCCATCAAGCTTCATAGTTCCAAT
3807	TGCAGGAACACACTCTCTCATCTCTGTCTCACACACACACACACACACACACACACACACACACACACACACACACACACACACACACACACACAC
3808	TGCAGGCACTTTGATCAGATGAAGGAAAATCTGTTTATTTATAGTGTGTATTATACACACAGCGCATATATACAGTATGTTATCATGCACTAAAAT
3812	TGCAGGTGTGTGTGCGAGTGTGTGTGTGTGAGTGTGTGAGTGTGAGAGAGTTTACAGTCACCGCTCAGTGCAGCAGACCTGGTTCTTCATTCACTC
3817	TGCAGGGAAATCAGCCACGCAGTCAGGTGAAACCCGAACATTCAGTCGCAAATCCTGTTGGTTTCCCGGCTTTCGGCAGCCCCGAGTCTCCTGCCA
3818	TGCAGGACACATTCATATGAACAATTTTATTGTCAGGCATTTTTAACGCCCATGTCTGCGTGTTACTAAGTGTTTTCAAAGAAGTACCATCAAAAT
3826	TGCAGGAAAGAAATACCTTAGTTGGGTAACAAATGTTTTTGTCTTTAGAGTAACTCGCCTATAAAACGTATATGTAAAGAAAGAAAGAAAAAGATT
3830	TGCAGGCCTGCATTGACCTGATAGAGAAGGTGGGTTGGTTTCTGCTCCGTGAACTGACTGTTGAACATCCAGGTAACTGGTCTGTGTTTGTGTTCA
3837	TGCAGGCTCATCTTTACCCTCTTTAAAATTCTCTCACAGAGTCTAACTGAAGGCTATAAACAGTTTGTCTCTCTTAGAGAATAATTTCCCCTGTAT
3848	TGCAGGCAAATATGTGCTGTCAACTTAATCTAACTGAACTTTAATCCGTTTGCCATTATTTTGTTTACTACCTGAGAAACAATGTTCATCACTTCC
3856	TGCAGGTGTTTAAAAAAAAACATTGTAAATGACTATCTTTTGCTGTTCTTCAGAAAAGTTAAATATCCTAATATTGTGAACATGATCGTGTGTTAG
3870	TGCAGGTTCATCGTCTGAGCCCAATGTCGCTGCCAGCTGGAAGCAAAGGCTTCGTTTTGTTTATCTGTCACAGTTTAAACGTCTCTTTAATGTCTG
3874	TGCAGGAGTTTCAGGATCTCTCTGCTGAAATAATCAGGGAAAGTCAAACGGAGTCAGAGCTCTGTGATGGTTCGCCTACAGATGACCTCTGACCTC
3881	TGCAGGTAGATCTAAAGTCTACTTGGGATTCTTTTAGATGGAACCTCTTACACACGCATAGAAAGTTAATTTTCCAGATGTAACCTTTTAAAAAAG
3882	TGCAGGCTCTGCACTCATCTTACCATCGCCTGTGAAGCCTGTGGTGCTTCCTGTGTCGGTTCTGGGTCCAAACCCAGTGGGAAAGGTCCCAACGAG
3898	TGCAGGAACCGGAGACGGCAGCAGCTGGTTAACCTGGTTGACCCACCGCTCTTTATTCAGGTGAGAGCGCCCCCTGCTGGAGGCCAACCCAAACCG
3903	TGCAGGGACAGAACATTGACACAGATCAGCTGACGCGCCTGGAGACCGGGACAGACCAGCGCTCTCCTGTTGACACAAGAGTTCAACTTTACTCTG
3906	TGCAGGAATATTTTAATAAACCCCAGAGTTCAGTTTCATTCCTTCGTTTAACAAACAGGATAGCATGTGGAAGAACCATACGCAGCCACAACAGCC
3914	TGCAGGATGGAGGCCCTGAGGACCAGGACTGGAGACCCCTGGAGAAACATACAAAAAAAATCTGGCACAATGAACTACATAGAATAAAACTATAAA
3916	TGCAGGGATCAGGAAGCACAGAAGTTGAAAATGTTTTCCAATAAAAAAAAAATATATTCAACGAGTTTCACCTGCATTAATTACTAAACCTTCTGG
3918	TGCAGGTTTTGACCCGTTCTAAAGGAAGACTCACCGAGTAGTTTGGGCCCATGGCTCTGATGGCGTGCCCGGTCAGCGTGGCGATGGTAAACAGCT
3919	TGCAGGAAATACAGAGACACAGTCCTGAGAGGGACCCCTACAGGCGGGGAGGGGAACTACAGCCGGACTGGAAACAGGAGAAAGAATCTGACGCAG
3920	TGCAGGGGGAGCTGCTCACCTGGAGGACATCAGAGACAAACTGACAGGCAGCTCCAGGGAGGACAGTCTCCTCTTTGTCTCTCTGGGAGTCTGCCT
3925	TGCAGGACTGGGAGGAAGCTTCGCAGACGCTTCAGAGAGACCTGAAGGACTTTGAGAACACCCTGATCCAGCTCAACCAGGTAACAAAACGATTCA
3927	TGCAGGATGCACAGAAAAACATAATGAATGAATTAAATTTCACTAAACATTTGCAGCGCACCACAGAAACCCCAGACATGTGTTCATGTCAGAACC
3932	TGCAGGGTAACTGTAATGAAAACAGAGAGCGACTGAACTGGTTTTAAAAGTTGCTGTAGTCTGTGCTTTTACACGCACAAATAAATGTATATAAAA
3945	TGCAGGAAACTGGATCTGCCTGCTTATAAAGCTGCCAGCGGGGTGTTTTTCTGGGCCGTTCTGTTCGGGTTCTGCCTCGGGTTCGGGTTCTGCTGA
3951	TGCAGGTAATCAGGTAGACGACAGCTGATCGGCTCGCCAAACAGCTCGTTGTCCTGTTTGCCGTAACGCTGGCGTAGGAAGAAGGCATTCGAAGAA
3953	TGCAGGACTCAGGAGTGAAAGTGCTGTCGTCTGGACTGAAGAGTCCACACTGCAAACTGGAGTTGCTCAGGTTCGAGCCGTTTTGTACATTTTTCA
3957	TGCAGGCCACCGGGTCCACCAGGTCAGGGTCTCTGCCGCCCCCCAGAGGATGTGGGACTCTTGACACCCCCCAGAGACTCAGGGTCTCTGCGGCCC
3961	TGCAGGACCTCTGGAACAGTTCTTACACACCAACCAGCATCGCTCGACACAAATCGAAGAAATAAGCACAGCTTTGCTTCTAGGCATGGGAATCTT
3970	TGCAGGAAGGTCCACAGGCTGCACCAGAAGTGCTACAGCTCACTGCTGCTGCTGTTTGCTCTCACAAGTAACCATCGAATTTTACGTGAATAATTG
3980	TGCAGGAACTGGATGCCCTTCTTGGGCTTCTGGTTAAACTGCTCCATGCCTGTGATCAGCAGCTGAACACAAAATCAACATATCTTTAAAAAAAAA
3984	TGCAGGGCAAACCACACATGCAAACGCAGACCAAGTCCATCGTTATGCTTGCCATTTCTCCAAACGAGAGACCTTGACCAGAATAAATATTATAGG
3991	TGCAGGTTATAAATGTCTGACGGAGCTCGATCTGCAGGAACCAGTTTGAGTGGAGAAACAAAAGCACTGCCCACTCCAGCTGCACATTTATTTGTC
4019	TGCAGGATCTTAGTTGAAAATTTTCACCTGCAAAGTGGCGAGCGATGTGCATTCCCTCGAGGAATGCTATTTTTTGTTAAGTTTTAAACAAAAAAT
4025	TGCAGGGTTTTTGTTAGAAATGCCGTAACGTCGAGCCAAGTCTCCGTTGATGCAGCGAACCCAGGCGGTCCGGGAGCTGAGGACCAGCTGACGGAC
4036	TGCAGGAAGAAGGGTGAAAATGTCAAGCCGTCTTCTTGATAAAACATTCATCTGTTCTTGTACTTTGCCTGTTAGATCACACTGCTGTACCTTTTG
4045	TGCAGGACCAGACCCAAACAGCACACTGGTGTAAATATACACAGAGCTGTGATAAGAACTAAGTTAGCCGTGATTTAATTTTATGATTTGAGTCGA
4054	TGCAGGCGCTGAAGCATCCAAACATTGTCAACCTCAAGGACGTTTTCGAGAGCCGATCAGAGGTGGTGCTTATCCTCGAGCTGTAAGTTCTCACGA
4065	TGCAGGTCTTCTGTTTGGGCTGACAAGAAAGTAAAGCAGATTATTTCAGCGCACATCTGTAAAGCTTCTTGCACCATCTGGGTCGACGAACTAAAC
4072	TGCAGGTGATTCTCACTGGGTGACTGTTGCCACTGGAATAGCCGACTGCTACTACAATGTGATGGAGCTGCCAGCAGGCGGCTCCTTCAGGTTCAG
4073	TGCAGGAACACACAGAGCAGTTTGATTGGTTAGGTAAAATCAGCTGTTATTTCTTTTCATTTTATTCACAGAGATTCAGTTCCTGTCAGATTAAAT
4081	TGCAGGTGTGTTACGTGCTGCTGGCGGCGCTCTTGTTGTTACTATGGTGTGTATGTGACGTTTCAAGGTTCCCGCGTTTGTTCAACGGAATTTCTT
4084	TGCAGGATGGAGGCCCTGAGGACCAGGATTGGACACCACTGATCTAAACAGACCAAGACACAAATGAGCTCAGCTTAGAAATGTTTCTTAAATGAT
4085	TGCAGGATGGTGGCCCTGAGGACCAGGATTGGACACCCCTGCTCTACGCTGTGATCTAGAACAGATTCAGGTTCTGTTGCGGTGCCAACATGAACC
4089	TGCAGGCACAGACCTTGGAGTTGGGCCAGAAAGCAGTACGACGCGAGGCTGTCAAGTCACACCCGTGCCGGCGTGCGGGGCGGGACACGAAAGAAG
4098	TGCAGGAGGTGCCCCAGACTGCACCGGAAGCACTACAGCTGGATGCTAGTGCTGCTGTTTGCTTTTACAAACCACCAAAAAGTTCATTTTAAATGA
4107	TGCAGGTCTGACCTGGATGGTGGACCCTCAGGTCCAGAGGGACTCCACACTGCGGGCCGAGGTCGGACCTGAAGCAGGGGACCGGCACCGTGCTGA
4111	TGCAGGCGGACCGCAGGGCCTCGTTCTTGGGTTGCTGGGATTTTCTCCTAAAAGAGTCGCCCAGGATTCGCCCCGATCTCCTTCCAAATTTAGTTT
4112	TGCAGGGAGGAGTCACATTAAACTCCTTGTGACCTTTTGAAGGGTCGTTGGGTTGCGTCCAAATGAATATACTTATGTGTGTGTGTGTGTAGAGCA
4126	TGCAGGAAAGTGGCTCCCGAGGACCAGAATTGGCCACCCCTACTGTAAGGGAATGCATCATATGCCTAAAAAGAGAATAACCTTTATATCAGAAAC
4129	TGCAGGGCTGCGTTGGGAGAGGCGAGCGTGGAAGCCATCAGTGCGGCGGCGGCTGATGGCCTCTGACAGTGTTGTGGTGCAGCCGCTCTGCCGTGA
4131	TGCAGGATAATCTGTTGAACAACGGCGCCACCTGCTGGATTTAAAGGGACCCCCAGCAGCAGCCGAAAGGGGTCACCGAGTTTGTTTACAGCCGCA
4132	TGCAGGAGAATTAAGCCAATCACATGAAAGAACAGAGGACCGCCCACTGTGAGGTTCTACAGTGTCAGATCAGAGGGGATCAGATCTGAGTCCTGC
4134	TGCAGGTATATCTTCATGCTCCTGCCAGAACAGTCGATCCGAAAGGGACATCGATGTAAAGTTTCCAGAGTGAGGCTCGTCTGAATCAAACTCCAA
4135	TGCAGGAGACAACAGTCGGCGCAGCCAGGTCATGCCAAACTGTGGATTTAACTGAACTGATTTATTGAAATGAAAAGAAAACAAACACTGGTTTTC
4136	TGCAGGCAGAGCAGCTCAGCACCCAGACTTTTATATTTGTTGCTTTTGGTTTGTAATTTCTTTAAAAAATTAAAAGGCTGAATCCAAAAGACACAT
4144	TGCAGGGTCCTGTCCTGGGTATCCTGTCACTGTACGGTCTGACCTTGGGGTGAATTTCCTGGGAAGAGTGGCGGCTGTTTTATGTGCTTTCCTCTC
4150	TGCAGGGCAGCTAAAAATAACTTTCTTTGCATATTTACAGAAACCCAAAGGGCGAGGGTGAGAACCACATGAGCACCAATTACCTGAGCAGAGAAA
4157	TGCAGGCGTCCGAACGAACCCGAACACGACGAAGCCCGCGCACGGGGGTCCAAACACCCGAACTCACTGAGCATGCGGGGTGTTGTCTTAGAGCTG
4187	TGCAGGTGATCTGTCCTGGCTTCACGGAAATGTTCTGAAACCTTAAAACTAAAGTTCAGAATTTTTAAAGTGGGGTTCTGTGGATAGGTAATGAAC
4218	TGCAGGATTTGGAGATAATATCCACTGGAGGACGCTGGAAGATGGCAAAAAAGAAGCTGAGGCCAGGTGAGCTGACACAGGACAAAGACCTTTTTG
4229	TGCAGGTCTGGTGGACGAGCAGCAGAAGGTGAGGACCATCAGTGCTCTGGCCATCGCTGCCCTGGCCGAAGCTGCTACACCCTACGGCATAGAGTC
4238	TGCAGGTTACCATGACAGCCAGACCCTGCCACCTTGACCCGTCTTGCACCAGCCTTGATGAAAACAGATCCGGTGTACGGAGGACAGAGGAAGCGG
4239	TGCAGGAGCGTCACGAGCGAAGACGCAGGAAACGGCGACTTCAGCGGCGCCAGCTTCTCACGGCGGGAGGAAAGCAGCTGCAGAAGAAGCTCCAAC
4246	TGCAGGCGAAAAACAGGTCAGCGGCGGTCTGCAGCTCGAACTCTAAGGAGACACGTTAGATCTTCTGAAGTGGGGTTCCGTGAACCAATAATATCT
4253	TGCAGGATATTCATTCTTCCTAACTTTCCTAATTTCAAAATGTCTGAACTAATCATTTAATGGCTGTTTGAAGGAATTTCTTCTACAGAATAAGCT
4264	TGCAGGCCTGGTTGTGAGAGAGGCCAGCATAGAGATCACTCGGCAGCAGGTGGAAGAGTTGTTTGGGCCTGAGGACTTCTGGTGTCAGTGTGTGGC
4270	TGCAGGAAAGGACACTTATGACTTATGGAAGTCTGGCACCAAATGCCCTCACTGAAGTAAACCAACACATTTTAAGACACCGTGACTCAACAACAA
4273	TGCAGGGTTATTGATTCTATTCAACGTGACCAATAAGAGGACACAAGGTGCTGAAATAAACAACATGCAGGTTAAAGATGCTCTGTATGTACAAAC
4275	TGCAGGAAGAGCAACATTAGTTAAATTATAAACTTGGACATTTGAAAAAGATTTTAAACATTGCCGTTTTAGTCTAAATATCTTAGTCAAATAGAA
4303	TGCAGGGGTGGAGTGGACGTGTAGACATTCGCAGTAAGGCGTTATGTATCACTTTCTGTTTTTGCCTGCTGGTAACTGGAGTTTGTTTTCTCTGGC
4306	TGCAGGTCTGCAAGAAGCCAGCGGAGCCTAAATTTCTGAGGCGATGGGAGAGATTTGTGGCAGTTAGGAAAGGAATGGCAAGCCGTTAACTTGCTG
4308	TGCAGGAGGAGACGCACACAAAGAGTCTGAGCACAAACACACACACACACCTGCAAATACAGAAGTGCTGCAGACTCTGCCTCCTGTGTGTTTCTG
4312	TGCAGGTCTCTCTGGTGGAGGAGAGTCTGCCTCCTAATGACCTCTGGTTGACTGGTGAGGGCTGATATTGATGCTCGGGTTTCTGCTGCTTTGTGG
4317	TGCAGGTTGAAGCAGTAGTAGGTCTCGATTCGGTCTGCGTCGTTGCCCAGATACTCCTCATGTGCGTGAAGCAGGAAATGCTCCATCATGTCCGCC
4321	TGCAGGCTCTGACCAAAGGAGGCGTCACCTACAGGGACGAGGTGTGGCACAGAGAGTGCTTGGTGTGCAGCGGCTGTGGAGCTCCTCTGGCCAGCC
4327	TGCAGGTGCATCTTTGTTGCAGTCCAATGGAAGTTAATCAAGAGCTAATAAGTCCCCAGTTATTGAGTTCCTTTACAGTGTGCCAGGTTAAGTAAC
4328	TGCAGGAATTTTATAATTTTCTGCCAGAACACTCATAAGATGTGAAATCAGTGGTGATGTAAAGGTTTAGAAAATGGAATTAAAATAAAACATTAT
4329	TGCAGGCTGCATCTGTTTGCAAATATCCAGAAAAAGAGAAGGCTGCAGGACGAGGCACACATGCAGCCGCAGTCCGGCCATAAATGAATTTTAAGC
4331	TGCAGGACTTTCTCTCATGCCGTGCCCACACATCTATTGTTGAGCTTTAAGAGGATCTGCCTTGGAGTTATCTAATAGTGCCAACAACACTGTGTA
4333	TGCAGGTAAAAATACCTTTAAAAAATAATATTTTTAAAGCTACTATTGTTTGTTAAGTTCAGAGTTTCTGATAAATCAAGCTGTAAAAGACTTAAA
4334	TGCAGGCCCATCTTCTCCAAAATTATCCTAATAACATCAACAAACAATGAATGAAGAGGGAAACATAGAAAATGTCTTAAACCCATATTTAAAAAC
4336	TGCAGGGTTAGGAACTGAAAAGATTTGTTCGCAGCGTGATCTTGCAGGGAAGGCCACATCGTGCTCGTTAGCTCTCTGCCCACTAGATGTAGCTGC
4337	TGCAGGATTGTTTTTAAACCAATCAGGTGAGCGTAAACAAGCGTAATATTCATCAGTTGAAGCGTGGCGGAGCAGAGGTAAATATTGCTCCTGATT
4338	TGCAGGCCGTCTGTTTGAAACAACAGATTAGATGGAAACCGCTCAACAGGAAGTGTTTAGGAGGGATGAATATTTCAGTAAATTTGTTAGCTAAGC
4340	TGCAGGTCCATATTCAACATCTTTGGTCCAATATGTCCCCTGTCCCTCCTCTGCACATGCCAAAACCATCTTTGTCTCCAAACCTGAACTGTTCAT
4352	TGCAGGATGGTGGCCCTCAAGGACCAGGATTGGTGACCGCTGGGCTACATGCTACTGAGGCCTCCGTTTGTTAAATTAATAAGTTGGTAAATTGTC
4355	TGCAGGGGGCGACAGAGCGACACGCTGCTGACGAAGATGAAGAAGTCAGGTTTGACAGTTAAAGTGATCCTTGAGATTTACTGCTGCACTGAAGCA
4357	TGCAGGAGCAACGCAACTAAGGCGCCTTTTGGACGACTGACTGAACTCGTTGACACAGGTAATGGTTGTGCTTATAGTCCGTTATTTTTTTTTTTT
4365	TGCAGGAAAACAGATGTACCATCAGAGCACGCGAATGACTTTAAAGTGTGATGAAGGACGTACACAAAGACGCAGCGGGGCTTTAGGAGCTCTGCT
4371	TGCAGGATGGAGGCCCTGAGGACCAGGGTTGGAGACCCCTGATCTAACTAATCGAACGTAGAGCAAACTCTGTGGTTTCTCTGTGATCTAACATCA
4372	TGCAGGATGGTGGCCCTCCAGGATGAGGGTTGGACACCACTGGTGCAGGTAAACAAATCTGCTGGAACTGGACAATCTCAGAGGAGATGTTTAGTT
4377	TGCAGGCAGAGAGCTGAACCCCAGCAGAAACATCAGTAACGGACCTTTAGATGCAAAGACAGTAACCCAGGACTCCCAGCAGTTCTGAGACCCTCA
4394	TGCAGGGGTGAGACCCGACGGTGACGACGCAGAACAGATACTTTGATTTGAACAGATAGCTTGATTTGTACGATTTGTTTAATGGATAAAAAGTTA
4395	TGCAGGAGCTCACCACTGTGAGAACACTTTGCTTCCCCGCTACTTCAGATTGTTGATCAGAGATGACTTTTGAAATTTGTCAGTCTGGTTGTGAGA
4398	TGCAGGTTCTTACAACTCCCACAGCAGTGTCCAGAGCAGGAAGGAGGGAACGCTGCAGAAGATCGGAGAGTTTCTGCAATGCTCCCCAACTCTGCT
4399	TGCAGGAGGCAATGGTAAAGATAGCTGGAGATGCAGAGAACGGTAAATTAGTGGCCAATAATGGGTTTTTTAAAGAAGGGTGAAGAGATTTAGGAC
4403	TGCAGGTTGTAAACAATCTGTCTGAGGCTCCTCCCCCCTTTGCGTCATACGTCACGACGTCAAGTCCCGCCCCCGGCAGAGCTCTCACGCACCAGT
4406	TGCAGGACAGAGGTGGGAAGAGTTGTTATACATTATAGACGCGGCGGGGAGATCAGATCAGGAGGAATTTTTAAACTCGAGATCGGCGTTCCGAGG
4410	TGCAGGTGACGTTTTTATCCTGTGATTTCATCCAAGATGAATTTGTAGACAAAGAAATAATCAGATGATGAATTTAAATATAATAATGTGTCAGAA
4412	TGCAGGTCTCCTGTAAAGTTCCTGGATTGGACAGGTTCAAACTGGATATTTGTCCCAACTGCAACTAATTGTCATCATAATTGGATTCATTTATAT
4418	TGCAGGGCGTAATGATAGGCTGCCGACCACACCGACACCCCGACAGACCGCTGCCGTGTGTGTGTGTGTGTGAGTCGATCTCCAGAGCGTGCACTT
4422	TGCAGGGACCAGGCTGTGTTACAGAGTACATACCTGGCATAGTAACAGGTGTGTACTCTGTAAGTAGTGGCCTGTATTGTGTATTTCTACTGAAGT
4423	TGCAGGTACCTAAAACAGTTTGACGTTGGCGTCAACACCAGACAACTGCTGCAGCCACTTTTAAATAATTTACTAACTTTTATTGAGTCTTAATCA
4429	TGCAGGCCAGACCTGATGCATTATGGGAAGAACCGCACAACAGAGACCACACACCAACAGGCTGCCAACATCTTGAATTTGTCTGAATCTTTTTGC
4430	TGCAGGAAAGCCTCCAGAGTCAGTCTGGACTCCAGACTCCCGTAATCCACATCAGGCTCTGATTTGGGTGGAAAAAATCAGAAGAAAACATCAGTT
4435	TGCAGGCTCCTGCAAAGGTGTGAAAAGCAGGGGTGGAGGGAGAGACAGGCACAATGTAGGAGTAGAAACATGGGTAGCAGCACATATACTTTGGTT
4453	TGCAGGTTTTTAGGGGAGGAGCCTGATAAAACCCACGCAAACACGAGGAGAACGTGCAAACTCTGCACAGAAAGACCCCGGGGCTCGAACCCAGGA
4495	TGCAGGCCTTTGGGCAGCTCCATGGAGCGAAGGACCTCCTCGGTGATGTCGGACGACCTCAGGCCTTTTAAACGCTTCTCCCAGAACAGCTGCAGA
4502	TGCAGGTGAAAATAGTCAGTTCTTTTAACAGTGGAATTTTTGCAGAGGTGTCCTTTGTGCATAAAAATTTTAAACTCTTCCCATCACAACCCAAGG
4503	TGCAGGGGTTTTGTTCGGTTACTAAGCAAATTTTTATGACCTTATCTGACTGGTAGCTGCAGAGCAACAGACAAGCAGTCAGAAAACCACATCAAT
4509	TGCAGGAAAGCAAAAAGAACCCACTGTTAAATTCAGGTGAATTTCACAAACATATAAGCATATTCTTTCTCTAATTTTTTAACTTAAAAAAAAATG
4525	TGCAGGGAACCGTCATAAAAGAAGAAGAAGAAGAAGAAAAAAATAATAATAGTAAAACCTCGCTGTCAGTGTGGACAGATTCAAGCTCTGAGTCCG
4528	TGCAGGCATGAGTCAACAAGTTAGTCAGCCTCAACGCAAATGTCAATAAAAACGAAACATTGTGCAATAAAAATGAATGGTAAAAGTCCAGATGTC
4533	TGCAGGACGGGCTGTATGCAGCCAGTTTGCCTGCTGATATTCAGAGCAGGAAACCCTGACTCACACAGGTTTAGGACTGTTCAGTCTGACAAAACA
4546	TGCAGGGGAAAGACAACATTTAATCTACAGGTAAACAAAGTAAACAAAGAGGAAAACAACATTGAATGAACATCCTGCTAATTTTTCTGTAAATCT
4549	TGCAGGAAAAAAAAATTAAAAAAAAAAAATTTGGCCTTTGGGTGTGATGAACCTTAATCCAAGACAATCTGAAAGTTACTGCCCTGTTTCAAAACA
4553	TGCAGGAAATAAACCCGAAGCCTGCTGAGCTTTCAAACCACGGAGGAACGTTCAGGACCCGATCCGTCCCCACAGAACGTCTCAGGACATTTTCCC
4555	TGCAGGACGGGCCGGATCTGATGGAGCGGGTCCGACGGAGCGGGTCCGACGGAGCGGGTCCGACGGAGCGGGTCCGACGGAGCGGGTCTGACGGGT
4563	TGCAGGATGGTGGCCCACCAGGACCAGGACTAGGACTAGGACTGGACACTGATGCTTTCCCTGCTTTGGGGCCTGATTTACCACCGGTGACAGTGA
4567	TGCAGGATAGACACCCCTGCACTAAACAAACCCCACTTATGGGTGTAGTAAGAACCTAAATGTTGATTGTTCTGTTCTACAGCAGCTCCAACTCTC
4570	TGCAGGGGTTGGACCTTCAACTACTTCTTAACAGCACCAGGCTGGACAAACCCTTCCATAGGTCCTCCATCTGCCTTCCAGCACCCATTGCCTGCT
4573	TGCAGGCCGCAGATGGCAAAATACTGCAGGCTGCTGACATTCTGACCCAGATTGATCCTTCCGACCTGAGACAGGCCGAGGGCACACACCGGGAGA
4577	TGCAGGATCATTTGGACATGCACGGCAAGCTGGAAGAATCGCAGGTACTAAAGATGACAAACTATTATATTTAAATATAAAACGTTCTCAGCTTTT
4578	TGCAGGACTCCTCCCAATCTTTCAAATCCAAGTCAGCAGTCCAGGCCCTTCTGAAAGAAGAGGCTGTGTGGCAGAACTCCCAGCAGCGCTTTTGCC
4581	TGCAGGAATGTCATAACATTTCTGCCGGAGTGACCATGTAGTTGGACACTGGCGACGACATGCAGGGTTTATGAACCATGAACCGTTGAGAAAGTT
4582	TGCAGGTGCAGCCTCTTGGACATGCAGCAGGACCCATGAATGGCCGATTCAGAAAGCGGCCCCCATCAGGCTTGTTCTCCAGGCCCAGGGCTAATC
4586	TGCAGGTATGGAAGAAGTAAACTCCGCCAGCTGGAGGAGTCGGACACGCCCACCAGGAAGCAAACTCACAGATCACCACAATGCCACCAAACAACA
4594	TGCAGGTCAGTGCCTCCCCCTATTCTCTGGAGACGTTAGTATACAGCCACCACAAATTTATTTAAACTTGGCTTCTAAACAACCAGACTTTCTTGC
4597	TGCAGGCCGGGACAGGGCGGGCAGTCGGCCCGTTGTCTGTGATGTCATCACCACGCGCCATCCTGACTCTCCATCAACCCCCATCTCTGACTGTGT
4605	TGCAGGAGACGGTAGAGACTAAAAACTGTAAAAAAAGGAGTGAGATGTGGTTTTGCTTTAACCAGCTGGACACAAACATGACTCTGTATCAGTAAC
4607	TGCAGGAAGTCGGTGGAGAGGCAGGAGGATAAAAACAGAACAGGAGGATGGAGGTACTTAGAGAGGTTAACAAGGGAAAACGTGTTATCTGCCTGG
4611	TGCAGGTCAGATAAATATTTGGAAATTAATAAAAAACAAAGAGGCAAAATTAGTTCAATATCCTGTTCAATATATCCACAAATACAGTTGTGGCTT
4612	TGCAGGACGGACAACATGAAGACGTCCGTCCGTCCGTCAACCAGGGCAGTGAGGAGCATTTGGATAGCCCAGGTCAATGCTTGTTAATCTCCAGTA
4635	TGCAGGTTTTTTAGGTTTCTCTGCCTCTTTTCAATAAATGGTTGGTTAGCGGACGTTGTTAAATCAGATGTGTTGTATTTTGGAAACAACTAAAAC
4636	TGCAGGCCCGGACGAACAGTTCCAGCATCGTGTTCCTACACTGGGGCCGACCAGCCTTCACCTCCAGCAATGTGGTCAACTACACCGTCCGCTGCA
4644	TGCAGGATGGAGGCCCTGAGGACCAGGACTGGAGACCCCTGCCCTGTAGTAAAAATAAGAAAATGCCTCCATCAGAAGCACTCAGACCCAGGACTC
4645	TGCAGGCTGGTGCTGTGGAGCGGTCTGGACGCCAGCTCCGTGGTGCTGTTCGACTCGGGTCGGGGTGGACAGATACCATTCGAGGGAGTGATCAGT
4652	TGCAGGAATCATCTCATATCTCTCTGTTTGTGTTGAACTGGAAGCTGAGGCAGGCGGAGAAAACGGATATTCACTTCTGTTCATTTACTCCTCAGA
4653	TGCAGGCATACGCTGATCCTACAGAAAAGAACACAGAAGTAGCTTTTGTTTACAGCCTGGCAGCTCTGCAATCAAAGTGAAGAAGAGAAAAATGTT
4663	TGCAGGAGGGACCATACAGGTACAATGCGGTGTCCAATGGGTGGCAGTCAATGGCGGGGGCTTTGGCGCTCTGACCCTGGCTTATTAAAGCTCTCG
4669	TGCAGGAGACAAGACGGGAGGTTCTGGTGTTCATACGGGACTATTAGGAGGCCGTGTGATGTGCAAGTCGTATTTTAGGAGAAAGGTGAGCCAGAA
4674	TGCAGGGTCATTTGATCTCACGAGGATTTCGTGGTTCTGATGCAGAAATGTCTTTTTTTGGTTCTATAGCTATAAACAATAAACTGATAAAGACTG
4677	TGCAGGATTTGATTAACAACATTCTGACTGGATTTTCACCAACTTTTTCTTTTAGGGAAACAAGGGTGCTGTTGCAATCCGTTTTCGGTTTCACAA
4678	TGCAGGACTGCCCTCCTCATTACGTGCCAACCTTTTTAAACAAACATGTTCACTCAGAGCGTGGACTGGGGATGACTCTCAGCTACTACCGCACCA
4687	TGCAGGAGCAGCAGAACTTAAAAGATTTAACAGAACAATTTGCAAAAGAAAATTTTAAAAAAACTGACAAAAAAGCTCTGTTGTTAGTGACACTTT
4688	TGCAGGTCAGCTGGTCTGCTGTCCTGAATCTGATTTCAGCTGTTTTTCATCTCGAAGGCGAAGGAAATCAGAAGCAGCTGTGACGTGTTCAGAGTT
4702	TGCAGGTCATATGTTTTCACTCCCGAGTGATAAAGCAGCACCGTGGCTCGAGTGTGAGCCGAGCCCATTCGGAACCGTTCCACCACTCCCAGTATG
4707	TGCAGGAACAATAACGTGACACAGACAGACACGTGCATGCTCAGAGAGGTGACCAAGGCAATCAGCGCTAATCGGCCACCTCTGAGAGTGGGCTGT
4709	TGCAGGCTGTTGGGACAGGTGGACAGATGTTAACAGATTTTTTTGAGAACTCATGATGGTTTCACTGTGTGTCAACAGGTGCGTGAGGCACTGCAG
4717	TGCAGGAACCCAAGTCGTCCAGCCAGTTGATGCATGAATGGGGTCTGGAGGACGTTCAGTATGGCTTCACTGAGGACGACTACAAAACGATCACCA
4725	TGCAGGGACATCCTAACATGTCCCTGTCCTCTGCTGACTCGATCTGAGCAGGAAGCCCGAGGTCTGCAGGAGGACTCGGCTCATTTGTCTAAGAAT
4728	TGCAGGGGCTAATTCATCTAATTCCTGTGTGACTGGGTACTTGAGCTAAGGTAACGTCGTCACTGCTGCTCGGTGACAAAATGTGGAGTGTAATAT
4747	TGCAGGTGACATTAAGTATTACTGACGACTTTTAGCTTTATTTGATTACCATTTAGAAATAAAGAAATAACTACATGCTCGTTATGCGCTGCCTGA
4764	TGCAGGACGGAAGACCAGGACCAGGACTGGACCCCACTGCCTTAAAGAAATGCCTATCACCCGCCGCCTTGCATGCTAAAGTTTTAAACACATCAT
4766	TGCAGGCTCCTAATGTTCACGTGTTGTTCAAACAGGCTTATGAAATGAGTAAACATGTAAACACACAAACACGGGGCACTTTGTAACGGGCTGCTC
4771	TGCAGGTGAACAACTATCTGGAATGTGACGCCAACTAAGACAGAATCATGTGCTTATCGCATTCACGCCATCATATATATATATATATATATATAT
4780	TGCAGGTTTTAGATGTTCTTGCTTTAAAACACCTGGTTTAAATGAACGACTTGTTGTCGTGCTCCAGGAGAACGTGATGATTTGGTGAGGAGGTGA
4782	TGCAGGTATCTTCTGTGTTTGAGTGACTTCCTGCTCTTCAGAGAAGCTCCAACAGAGTCCCCTCAGCTGCTGGACCGGTCCCGGCCCAGTGGTTCA
4794	TGCAGGAACTGCTAGTTGCTGATTGGCCCGTGTGGTGGCCTCAGCAGGTGGAACAGTGATGATGATGGTGCTGACGGATCCTCAGGTTCTTCATCC
4804	TGCAGGTTTTTCAGGTTTGGCTTGGCTGAAGCCCCGGAGACAAAGCCTGAATAACAGGTGCTCCCTGTGGCCCGACTCCAGGACGGAGCCTTAATT
4807	TGCAGGATGGTGGCCCTGGAGGACCAGGGTTGGAGACCTCTGATGTAGTGCGATATTGCTAGATGTTCGCTCAGGGAATCTGCGGTGGATGACTCT
4813	TGCAGGAGCTGGGTAGCCTGCAGATCAAATACATTAAGGTAATAAGTTTTAGCTTTTGTGCTTTATCCACAATGCAAGTTGTGTACCAACAGTTTT
4814	TGCAGGTTGTCACGGGGTTTGCCGTTCACCAAGTCCAGACCGATCCTATAGGACACAAGGGTTTGGTCATCCTATTTTATCTAACATCTGAGGAGG
4818	TGCAGGGCGGACTGAGAGGAAGAGGCTGCAGGTGAAAATGTGTGGGGTAATCTAAGCAGCTGTCAGGGCGCTGTGACGGAGGGGCACGGGTCCAAC
4825	TGCAGGATGGAGGCCCTGAGGACCAGGATTGGAGACCCCTGCTCTGGTTTAAGCTGCTGTTTGTTGTTGGAGACAGGAAGCACTTCGAACACTCAC
4832	TGCAGGAATATGGTAATAATTCTTACATAATTACAGGTTTATTTGGTCTGTTGAGCAGTTGTTAGCTCGTCAATCCGCTCAGAATTCAACTCTTTC
4838	TGCAGGACCAGGGTTGGACAGCACTGCTTTAGGTCATCGATGGCTCAAACAGTTTCGAACCCCCTCATGTTGACCTTCAGAAACACCTGAAGGGAC
4855	TGCAGGACCACCCGGACCTTCTGGCTTGCACCGTCGGTAAAAGGAACAATCCACCAGAAAAGCTGCAGGTGTTTTAAATCGTTCCGAGACGCCGGA
4861	TGCAGGTGACATGCTTTGTTTTGGCTGTGAGTCAGACTCACTGCAGAGCTGAATATAATAACTCCACATCCAATCTGAAGCGTCGCCGTTTCCATA
4869	TGCAGGTTTCTGTGCTGAGGAGAAGCAGCATATTCAACATGGGAGGCTGAAGGATCCGAACCACCTGTCAGTCCAGCTAGGATCAGACCTCTTCTG
4874	TGCAGGACGTTCAGGACTTCATTTGTTTACATCTACAGCTTTTCTTTCTATCTCAGTGATTATTTGTTTACTTTTTATATAAAATAAAAATGTATT
4888	TGCAGGAAGAGTCAAGGTCAGCTCCTGTTTTTGTACCTTGTCAAGTTCTTCATTACTGTAAACTGCAGAGTCCCTGATCCCCCAGTTTCCTCTGCT
4891	TGCAGGAGGGACAACCAGCCTGAAGTTCAGCTGGAGGCAGTCCTGACGTGTGTGTGCAGGAACGTGTCCTCAGGGGACAGCAGGTTAGTTGGTGTT
4897	TGCAGGACTGTCTGTGTTGTGAGGCGTGTGTGGGAGCAAAACTCATGTGTATAACTTCATTTTCTCATTCAAAGTGCCACCCTGATCCGAGGGCAA
4898	TGCAGGATAAAAACAAGATGAGTTTCACCCACACTTTAAAACGTCACTTTAAAACTCCAGTTCAACTCCAGTTCAACTCCAGTTTAACTCCAGTTT
4906	TGCAGGAAGATCGGGCCGTTTGTGCTTCTATTGCACTGGAACTGGTGGATTGGTTGGGTCAGATAGTCTGTAGGGGGTGGGGGGTGGTGGTTTCTG
4908	TGCAGGAGGCGCGGCGCCGCGTCACTGCAGGAGACAAACATTCAGACAGTGAGCATCGGGAAATCAGAGGCGGGAGACAAAAAAAGCAACGATTCT
4914	TGCAGGATTTCCCTTGTTTTTCTAGAGTATAACGGCTGTCTCTTTATGTTTGCTGCAAAAACAACAACTGGCTTTTAAGACCACGCAGGCGTGTGC
4915	TGCAGGTAACAACAACATGCTGGTTTGCCAAGATGACTCTATGTCCGTTCACATCCCAAAAGAACTCTTCTACGGCCTTCCGTCCACCATCTACGT
4918	TGCAGGTTCTGTGTGAGCAGGGTTTCAAAGAGCGCTGCTACTTTGAAGTGGAGACAGTTGAGCCCTTCAGCATCGGGTTGACGTACAGAAACATCA
4923	TGCAGGATGGTGGCCCTCGAGGACCAGGGTTGCCCACTCCTGGTGTAGAGCAACAGAGCCGTAAGCTGCAGTAGGGGGTTCTGAGAAAACCATGGA
4925	TGCAGGTTTTGTCCTGTCGCAGGCAGGTGAGAGGTTGGGCTGTGGGACGGCTGTGAGCCTGTTTACATAATTGTCCGATGAGCCAGGAGCGCTCAC
4927	TGCAGGATTCAGTCAGTGCTGCTGGATGATACATGCTGACAGGTGAGCTGCAGGTGACAGGTGGTTCTGTGTGAGGCTTTGCATGATGATGTCGTC
4930	TGCAGGTGACTAGTTAGCGAAAAACATTTGCGAGGGAGTCACTGAAATACCTCGAAACATTTGCGGGGTTCTCTATGTCCTCGCCTGAGTCGCAGA
4937	TGCAGGAGACGTTTCTGAGGAAGTCAAAGATGGCGTCTGAGAGTCTCGATCCCCGAAGCTCCGAGGATTCGTCTCGTTACGCTTGGAAAGAAAGAA
4952	TGCAGGGGTCACGCAGTAAAATCTGAGTATAAACCAGGTCTTACGCTCACCTGATAACTTCAGCAAAATAAGCATGAAGCAAAACTCATCTCTGAA
4963	TGCAGGGTGTCTGGGCTCTCCCTTAGAGATAGGGTGAGAAGCTAGGTCATCCAGGATGGACTCAGAGTAGAGCCGCTGCTTCTCCACATCAAGATG
4965	TGCAGGACACAGAAACGTGACGCCCGGGCCGTGTCTGTTTCAGAGTCAGAGGCAAAAGAAGTTAGAGGCCAAGAAGATTCGCGAGCAGATTGAGGA
4969	TGCAGGTTGCAGCCTTGTCGGGACAATAAAGACACGTTAGAAGTTACCCACGAGTCTTTTCTCGGCGTGATAAATTTCTCTTCAACTTTTCGTTTC
4978	TGCAGGGCGCGCTAAGCCGCTCACCCTCTCGATCTGCTCCTCACCAGTAACCACGAGGATGAGGACAATCTCCCAGAAGCGCTGGCAGCCATCTCC
4983	TGCAGGAGGCCTTGTTTCGCTCTCAGAGGCCTGACCATGAAAGGATATGTAATTATTCCAGGACCTTCCTTTTGGCCTGTAATTACGGCACCGGTG
4987	TGCAGGTTTACAGCTCAATCAAAAATAAAACCAGTCAAATATACTAATAATTTGCAAATAATAGAGAAAACATATTGAAACTTCATTTTGTATAAT
4992	TGCAGGGTTTATGTGTTCACTGTTTTGGTTTACCAGTTGCTGACAAATGAACAGCAAATTAGTTTAGGATTAAAAATCTGTGGGCATTTTATAGAT
4993	TGCAGGCAGCGCAGTTCGGAGCGTTAAACGAGAAACACGAGCGCAACGAAGCTCAGTGAATTCCGGGTTTTACCTCTTCTTCCGCCGCTCTTCCCT
4997	TGCAGGAGCCCCGTGAGGATGAGGAGGATGGACGCCTAAAGACGAGAAGCCCTTTTTTTTATCATTTGTTTTTAAACATCACTGCTTTAGGAGCAT
5001	TGCAGGAAAAGCCTCCAAGAGAGGAGCACCGAATCAAATTATTCTCATAAGATGGTATGACCTTAGCTACACTTTATTCAAGCCTTCTTACCTCCA
5002	TGCAGGGCAAATCAATACAGCTCTTCTTCCATACGCCTGCTACTCTAGCTGAAAAAAACCCCCCAAAATTCCAACAAAGTAAGAACTATTTAATTG
5003	TGCAGGAACAGAAGAAGAAATGATTCTTACCTTTCTGAGGGCTGAAAAACAAACCATTCACGGTAAACTCATACAGAGTTAGACTCATCTGACAGG
5007	TGCAGGTGGTGGGCCTGTAGCTTTTCCAGCTTGACCCAGCCAAACTCTAAGAACCAGGGCTCCACCTTCAGGTGCTTCCTGGCATAAGGTGGCAAT
5010	TGCAGGTTGTAGATGTTGAAACACGGAGGACAGTGGGCCTCTGAATTAGCGGTTTTCGACTGTTTGCTGTGAAAACGATCCAAATGTCCTGGCAGT
5018	TGCAGGTAGAGCTGAGATGATGTGACCTGCTGTGACACGGCAGCTGAACGGTCCTGATGCACAAATTCAATTTCAGACCCATCAGCTGCAAACTCT
5021	TGCAGGGAGGCAGGAAGCGCTCCGCTGAGCAGCTTTAAAGCGTCGCTGGTGTCGGCGGCGCTCTGCGGTGCTCCCCAGTGTCATCTGACGGCGAGG
5023	TGCAGGAGCGAAGACAAGAGCTGGTTACCAAACAAATTACAAGCCCAGCATTGCTGGAAGGAAAGCATATTGTCCATCACCAGACTGGTAAACTAA
5028	TGCAGGGGTCACCACAGCAATTATCTTCTCACGATGGATTTGGCAATTGTTTTACACCAGAACCCTTCCTAACGCAACCTGGGCTCAAACCCACAG
5036	TGCAGGTCAAACCTCACCAAGTTAACTAGTTTACTGTTATTTACACATCTCTTCTTCCAAAGAGAAACCAAGAAGTGACCAAATCATCTGAAGGCA
5049	TGCAGGTCCTCCACAACTAAAATGACCTTCAGCTGCATTTAGTGCCTTGATCATAGCGAAGACAGGGTTTGGGGTGAAAGAACAACATCGGCTCAC
5054	TGCAGGAGGCTTGACTTTGGGTTGAAACCGGACGTAAATGTGTGACTTCGGAGCTTTTAGGGACGTTACGTGACATGGACTCCGGTAAAAGTGACT
5060	TGCAGGCATAAAGTGACCTGAATAGCAGAGAAGAGAAGTTTACTGGACAATAGTTGCAGAGTCATTTGGAATATTAAAGTGAGGCAGATTGCTGTT
5062	TGCAGGATTTCCTTTCCTCGTATTGACGGTTAACGAGGCTTTAAAGCAGGGGTGTCAAACCCAGAGACGCGAGGGGGCCAAAATTAAAAATGTGGT
5064	TGCAGGTAGATGCAGTTGGTGAGCAGCGACTGGACGTTCTCGTAGTTTTCCGGTTTCAGCTTGGAAGCCGACGGGAAGTAGTAGAAGTCCTGCTTG
5074	TGCAGGACTATAACTGAGCCTTAATGCTGCAAGCGCCGCAGCTTTGTAGTTCAAAGTCGTACTAAAACATCACGACTTCTTGCATATATAAGGAGC
5098	TGCAGGATTTCAGCGTAAAAGCACGCCCGGGTTTCCGCTCCGAACAGAACCGAGAACGGTTCGTGGTACTGAGCTCAAAATGTTCCTCAGAACCTG
5105	TGCAGGATGGTGGCCCTGAGGACCAGGACTGGAGACCACGGCTCTAACCGAATGATTTGCAGTTGTTTCCCGAGGTGGAGGACATCAGGCCCTCCG
5107	TGCAGGAAAAAAAAAAACAGGAAAAAAACCCCCAATCACAGCAGATACTTGTCCTGTCAGATTGTGAAACTGCAAAACTTTTGACTCAGAGTGATC
5110	TGCAGGAACTTTTTCAATATTTGTTCAAAGATTATATCTACACAACAGGTACAACACTAATTGGTCATAACTTTTCCACAGAATCTCACTTCAGTG
5114	TGCAGGTTGGCGCCGACGCCGCGCGCCCGGCTCACGCCGACGCCGCACCGTTTCACCCGTCTGGGGTTTATCTTTCAGAAATGCTTCCAGAAGCAG
5122	TGCAGGATGGGGGCTCTCCAGGACCAGGGTTGCCCACCCCTGCTCTATAGGGTGGTCAGATTCAGTCATAAGATAAAGTGAAGAGCTCCGTTATCA
5126	TGCAGGGCACAGAGTTCAGACCACGTCAAAGTATTTTTATTTTTATTATTTCTAAATGACGTATATGTTTCTCTGAACGTCTGACAAAAAGCATTC
5127	TGCAGGAAGTGGAAACCTCAGAACCCTCTGTGGTAACAAACGGTGAAAATCAAAACTACGCTACATCTCTGGCTCAGACAAAGACTTTCTGAGGAG
5130	TGCAGGTTAATGAAACGAAACGTTTACAGTTTGAAGCGATGCAGACGTTAGACAAGCTGTCTGCTCAACCGGTTGACTCGTCTTTTGATGCAGGGC
5135	TGCAGGAAAAAAAACTCAAAGGCTAGAATTACATGAAACTTGTAAGAAACCAAGAAATTTGTAAAACAAGAAACTTCCAAGAAAGAAAAGAAATCT
5141	TGCAGGCAGCGCGGCTCAAATCTCAGCTGCAGCAGTTTGAATTTACAGGAAAATCCCACCAATAAGCAAAAAAAATAATAATTAGAGGAAGAAAAA
5148	TGCAGGCCTCTCAATCCCTGACAGGCAGACAAAAAGAATCAGAGGAACTGCAGATCAGATGAAACTTCTGCTATCACACACACACATGTTGAAGTG
5159	TGCAGGTAGGACCCAGACCGTCTGTCCCTCTGTCCCTCCGTCTGAGCTGAAGCTCTAACCCCTCCTCTCCTCGCAGGCGGCCATGTACGTCCAGCT
5171	TGCAGGAGAACGGTCTCTAACATCGAGATGAAACATCTGAGCATCAAGATTCGTTTGAGCACAAGATCCACTGAATGTCAGCCACCTTACTGAACA
5199	TGCAGGATGGTGGCCCTGAGGACCAGGATTAGAGACTCCTGCTTTAGGTTTGACCAAAACGGTTTTAGCCCCACCCCTTCTCATCATGGATTGGTT
5206	TGCAGGGAGTTCTCCTCTGTCAGAAACCCTCTCAGATTACAGCCATGAACGTCCAGGTCTAAAAAGGCCACCAATAATAAAGAACTTGACTCAAAA
5225	TGCAGGAAATATTCAAACGATAGCTAGGATATCAAGTATTTATACAATTCTTTCTTCTCCAGATTTGAAATGAATACAATATATGCATATTGTTTG
5226	TGCAGGAATGTCATAATATTTCTGCCTGATTATCTGTTTAAAACAAAACTGACAACAATGTTTTTCTTGGTTTCATTTCAAGCTTTTGTTTGAACA
5232	TGCAGGTCTGTTAATGATTCCTGAGCTCAGAACTAAATGTTTCTGAGACTAAATTTGGGTTCCACTATAAAACCTCTGATGCGGTCAGTGGCATCT
5248	TGCAGGTGTAAAAAATGAATAATCAAATTGCTTTCAGCAGAGTTCAGATCCCATAAGGTTTAATTGTGTTTCATTTTTATTTTTATGAATTTAAGC
5249	TGCAGGGCAATACAACCAGCTGCAGCAGAGATTAACCACCATCAGACGATCAGATGATGTGACCGAAGGACTTAAACAGCTTTAAATCAGGTGTTT
5253	TGCAGGAATACTTCTGGACACATTCAAGAGTCGTCCTTGGTTACATTAACAATGACGCAAGGAGATTCATCATGTGAAACACCCAGCTATCCTTCC
5262	TGCAGGATGGTGTCCCCTCCAGGACCAGGATTGGGCACCCCTGGTCTAACCCTTCTCAGCAGAAGATGATCTTAGTCTCAAATTTGGCCTAAAAGG
5269	TGCAGGACCTGGCGTAAGCGTCATAATGTTTTTTCATTGGGCCGACTTTTCTGCTAAAACAAAGCACGTGGATGTTGTTTGTTCGTAATCAATGAG
5275	TGCAGGAAGAGCACTGCAGTAACCGAGGCAGGAGATAATCGTTGCCTGTACCAGTAGTTAGGTAGCACACAGAGTCAGATAAAGCCAGATGCTTCT
5289	TGCAGGAGAAGTTTCTGTGGATGTATCCATTCGCCACCTACAGCTGCAGCTTTAGTCCAACAACGAAAACCTCCAGATTGAGATTTGGTTTGAAAT
5293	TGCAGGCCTTTTAATTTAGTAAAGGCCTGGAAAACCCTAAAGAGTCAACTTTTAAGTACTGTCAAAAAGCGCTAAAAAGTGCAATAAGCGCTAAAA
5295	TGCAGGCAACGAAAATTGCAAAAGTGAGAAGAAATGTGATTCAAGTTATCTCAATTTTATATTCAGTTGGTGTGAGTCAGAGGAAGAGCCAACATT
5302	TGCAGGGTTAAACACACTCTCTGTGACCATTTTGAGTTAGTGATTGTCTCAGACCTCTGCCTTGCACTGTCTTTAAACAGCCCAGCTGTTTCGCTG
5304	TGCAGGCACATGACTATTTTTTTGGATTGTTGCACGATGCAGATACCTGGAGGGCTGTGCAGGTCAAGTTCTAAAACGAAAGAGCGAGTCTCGTTC
5308	TGCAGGAGATCCTTCTGCACCAAAGTGAACGTGAGAAAGGAAAACATTTAGTTATAAACTCAATAAAACTTCTCTTTTATGATGTGAGTCTACATT
5316	TGCAGGCGTAGAGAAGATGGGGGAGAGGAAACAAATGAGGGTGTCAGTAATGGTAAATAAAAATAAATAACATAGTGAATGGAGTTAGGAGTGCCT
5320	TGCAGGACGGAGATAAACGAGAGCTTCGTCGCCCGTGCTCTCAGGTCCTGCCTCCCTGGTTTGCGCCGAGACGCTCCGGCAGAACTGCTACCAGGG
5332	TGCAGGTTGGTTCATCAGCCCAGAGTCGTTGCCCTTTTTTTTTTCCCTCTTCTCTTCTTTATGTAATCAGTAGAAACTCAGATCACCAACAGGGAA
5336	TGCAGGCACCCGGCTTCAAGTAAGTTCATCTTTCAGAAGCGAGTTAGCCGTGTGAGCTCTCGCAGGAGGAAACTGGGCTCCTGTTGGTAAGGCTTT
5345	TGCAGGCTGTAGGCAAAGTGCTCTGTTAGTAAAAAATGGAGCAAGAATATATTTAATATAAAACGGAGCTTGGTGGTTCTTCAATGTATTTTGAAA
5358	TGCAGGTCAGGAGCAAACCAGCAACATTTCACCTCAACGCTCAACACGACGGCTCGCAGCTGTTAGCAAAACCCAGATTTTATTCACCATCAAACC
5360	TGCAGGTTTACCTTCTGCATTTTAAAGAAAATTTCTACCTGTGCACATCAACACTAGGCTGAATTTCAAACTGGGGTTTGTCTGAAATTATGTAAT
5370	TGCAGGTGTCTGGGGGCGATGCTCCATCCTGGTCAGGGTTCAAGTTTGGCTCCGGATGGTTGGAAGGAGATCCACAGATCAGAGTCCGTCTGGTTC
5382	TGCAGGAAGTCGTCCATCTGGACAGCAAGAATGGCTGCTGCTCCACCTTCATCCTGAGAGCACTCAGAACCTGAGGCGGAACCAGACAGTCAGAGA
5394	TGCAGGCATGTGCATGTACTCTTTTCATCACAAAGGAGGTACAATAAAAGAAAAAAAGCTGAGACGTAAATTGTGGGTATCACCTGTATCAAAAAT
5399	TGCAGGTGGGCTTTGGCAGTTGTAATGCATGAAACTATTTCGGAGGTTTAAAGACAACTTTTGTCAGTAATTTCCTGGTATTTGCAGGCTTTCTGA
5410	TGCAGGGTTCAGACGTATTCTCTAAAACGATATTGAACATCCAATAAGAAAAGCTGGAACTCCTAATCCTTGTAGATTTGCACTCTTGCTTTTATA
5415	TGCAGGGGCAGTTCCTGCAGCAGGTCACAGGTGGGCCTTGAACAATTGGAGCCACCTGGGTTTAGTAATTTAAACAGGGCTCTACTAACCAGTCTC
5421	TGCAGGCGGAGACAGGAGTTAGACCTGAGAGCTGCGGAACGTTTCAGACGTTCGTAAGGAAAAAAAACACGGACCTTCAGCAGGCTGGTCAGGTAG
5428	TGCAGGCAAGAGATTAAAAGCCCAGTTTGAAAAGGACATTGGCCACATTCAGCTGGAATATAAATGAACAGTTTTAGTCTGAGCATAGAGTTTAGT
5429	TGCAGGCCGGCTTCAACTCGGTGGATCAGCTGGCACAAATCACAGCACAGTCAGTTTCTGTTCCCCGTTTATCTCCGATTACGTCTCATTTTAACT
5430	TGCAGGGTGAGCGGCACGCCTGATGGTTCGCCATCATGGCCACCAGCATAGTAGAAGTTAGCTCGATATCTGTCCAAACGGCACGACGTCCTGTAT
5431	TGCAGGGCCGTCAACGAACTCGGGCAAGACGAGGTGGAGTGCAGGCTGGAGGTTCGAGGTGGGCTGCCTCCACACCTCTGCGACATTCTTCTCCTG
5436	TGCAGGTCAATGAATGATTGACTGTTTTGTCAATTGAACCAATCAATGAACTGTTTCTTGTGTTGTGTCACTGGTGAGGTTTTACTGTGGTTACAT
5438	TGCAGGGGTGGAGAGAGGCATGTGGTCCTGACTGCCACTCCTCAGGCAGCTCGGCCTCCGCAGAGCCTCGCCGAGGAACGAGTCCAGGGCAGATTT
5443	TGCAGGTCTTGGAAAGAGAAAATGACAAGTGAAGCAACACTTTCTGCACCAGACAAGTCAAAAAAAAGAGAACGTTTTTGTCAAATATTGAGCAGT
5445	TGCAGGAACTTTGCTCCTAAAGATAAACGTCACAATCGGCTTATTGTCATTTATAAATAAGGCTTATTTCTAAAAAAGATTTAAGACACTTTTGGT
5446	TGCAGGCCACACTGTCTGGAGCAAACAGAAAAGGGGAAAAAAAACAACTTAGGAGGGCTGGAGGACAAAGAAAAAAGAATTATGAATAGCAGGTTA
5450	TGCAGGATGGGTATCAGCACTGACCCCGACTCCGTGTGCGAGACCCGGGATGAACGCCGATCAATAAGCATCATGTGAGCATCACTTAAGGGCTCT
5452	TGCAGGTCTTCAGGTTCTACAGAAGCCCGTTAACCACTCAGCCTCCAGAACCAGGACAGTTGTCTCCATGTGTCCCTGTGATGGACCGGAGACCTG
5456	TGCAGGATGGAGACCCTCCAGGACCTGGGCTGACCCTCCAGGACCTCCAGGACCAGGGCTGGACACCACCACACTCGGTGTATTGTCGTAACCCTT
5464	TGCAGGGAACCAGAGAGAACTCTTTAACAACTTCTGGCATGTGGACTTGAGTTTGACCAAATACTCACCACACACACACACACACACACACACACA
5468	TGCAGGAACTGGTGCTGCAGCCAGGAAACAACGCGTGTGCTGACTGTGCAGCTCCTGGTGAGTAAAGTCCACGAGATTCCTGATATCAAACAGGAC
5491	TGCAGGTTTGGGAACCACTGGCACCTGACAGAAGAAAAGCTGAATGGAACGTTCCAATCTGGAAGCTAATCAGTAAATCTGGGAGGATGAAGATGT
5495	TGCAGGTGTCACTGCAGGCGGAGGGTCTGAGCACGGCGACGGCGGCGGCGCTCTCAGCCCCCCTGCCGCGCGGCTGAGTCGATATATTTGCCGTAG
5502	TGCAGGAGCTCCTTTCAGGTGGTTTCTGATCCCTCGGCTGAACCCTTCACCCCTCGGTGTCTTCTGTCCGTCGTCTCGTACCTGAGGGCCTCGAGC
5515	TGCAGGTCGTTTCTGGCTGATGGCTCCAGTTGTATTGAGCGCCCCCTTTTTGTTTTACTCCACGAGCTCTGAGGCCTCGTGACAGAGAGACTCTCC
5517	TGCAGGGTTTTGTGCACTTGACAGCGTAGCGTTTCATATTGCTCGAAAATGAGATGTTGAATAAAATGGTGTAAAGAAAACATGCAGAATATGAGA
5524	TGCAGGATAGTGGCCCCCCAGGACCAGGATTGGAGATCCCTGCCTTAAAGGCTCACATTGCCTGCTGTCTCACGGGTCAAAGTTTTAAACTAACGT
5526	TGCAGGTAGGTCATTAAATGGGACCTCTTGATGCATACTACATGAACATTAGTAGATTTATCTTTTTGTATATTATATTACATACCTATTCAGTAT
5527	TGCAGGTTTTAGATATTTTCCTGCTTCAGCACACCTGATTTAAATTAATTGGTCAACAACTTCTCCAGAACTTGATGAAGCTGTCAAGGTCATTTA
5536	TGCAGGGTTCCAGCGAACGGCGGCGGGAACCTGTCCCGGGGGAGAGTCTGGGACTGCCGGAGAAGATGACACACACTTCCAGAGAAAGCTCGGGGA
5543	TGCAGGAAGCTGTTGAACTGATTGTTGCCGCTCACACTTCCTCTCGACCCATAAACCATTTCCTGTATGGCACAGTTTGAGCTGTCAGCGGCGCTA
5558	TGCAGGTTGTGAAGCTCCTCTCTGTGTTTCAGGATCTCTGCTTCCAAGCCATCCAGCTGGACCTGGAACGTCAGGCTCTCGTCCTGAGGGGACAAG
5564	TGCAGGTGGAGTGATCAATCTGTCCGTGCCCGTAGTGCTGCCGGTGTCTTCTGCAGATAAAGAGCGTTTGGAAGGCGTGACGGCGATGGCGCTGGT
5567	TGCAGGGGCTGGGTTTCAAACCCCTGCTTCTCCAAGTGGCTTCAAACGGATAACATGTTACTCATATTCCTGAGTTATAGCTGTGTGATTTAACAG
5569	TGCAGGTTTCTGATGTTCCCGAGCCGCCCGAGTGGGGAAAAAATCCCAGCTGGGGTTCGTTGCAGCGCTGGACGCCATTTAGGCTTAAATTTCCTG
5574	TGCAGGCAAACGAGATTGCATATTGATTAGCCCTCACAGTTCACACGGCGTCTTTGTTTCGTGTTAGTGGGTTCCTGTGACGTAACGAAGTCAGGG
5585	TGCAGGTGAATCAGTGTTAGTGACAATTAACTGTCCTCCATTACGACGTCCCTTGATCGTAACTGAACTCAGTCCTAATTAGTTGTCTCATCGTTC
5599	TGCAGGCCCTGACCGCAGACGTGGTGGTGTTTCTCCCAGTCTTTGTGTTGGCAGAAGGAGCCACAGTAGCGAGCGGTGTTGCACCCGCTGCATGTC
5603	TGCAGGGTTCACCGTCCCAGTTCATGCAGACCTCACAGTGACTGTATGTATTGGTGTGTTAGCAAATACATATCTCAGTTTATACACATGCTTAGC
5606	TGCAGGGAGCTGTCCTCTGACAGAAAACATGTCTCCGTCCAGAAACCAACACAAAATACTACATAATTGTCAAGTGGAAGGAAAATGATACATGGG
5609	TGCAGGCAGAGTTTAAGACGATCGCAGACAACGTGAAGAAGGTGAAGACGCAGCCCACTAACGACGAGCTGCTGACCCTGTACGGTCTTTACAAGC
5610	TGCAGGATTCAGGAGTGAAGCTTCTATCTGCTGGACTGGAGAGTCCACACTGCAAACTGGAAACACTCAGGTGACACCATAGGAGGAGTGGGGAGG
5624	TGCAGGGTTCTGGGTTTTCCTGGGGAAAATGAAACATAAAAACATGGTGCTGCTGTTATTTTTACCCTCCTGTTCCTTCATGTGAAATAAATTTGG
5626	TGCAGGGGAAACCGCAAACACACACGGGTGCGTCTAAATGTTTCATCATTAGAAACACGAGGGTTAAAAGGAGCAGGCTTTCGATAGCTCGGTTGG
5643	TGCAGGATGGTGGCCCTCCAGGACCAGGATTGGCAAGATATACATGTACCCCGCAAATGTGTTATCCAACGAGTACCTTGTTCGTTCTCCTGTAGG
5651	TGCAGGTTTGCTGTTTTGGCCAGACATCCAGACATAATTGTCTATCATTTTTAGATGCTTTTGTTTTGTCACAATCATCTCAGTCATCCCAGATTA
5654	TGCAGGGTCTGACATCGACTCTGAGCGTCTTTGAAACTAACAAGATGCTGAAGGAAGGAGTGATCACCAAAACAGGCAGGTAGTTATAAAACCATC
5668	TGCAGGTTGAAAACTGTAGCGCGTTTTTGATCTGATTTAGTGGCTCAGCTTGATCGATAAGTCGGATCGTTATCACGTGTTCTTGTGTATCTTTTT
5675	TGCAGGAGAAACAGACACATTTACACTGACGCTTGACCCAACAGAATAACCATCAAATAATCAAGCACGGGTTATTCTGAAATACCGTTTAAGATT
5677	TGCAGGCTTTTGGTTAGTAGGTAGTTCTGAACAGATTCTTCAGGTTCTTCGTTTTGTTGTGATTCGGGTTCTGTGCAGGCCGTCCCGTCACACCCA
5678	TGCAGGTTCACTGATTGCTGCATGTGAAGAAAAACACGACGGTTTTACTGTGAGAGTCACAAACACGATCTGCAAATCTGAACCTTGGTTTCAAAC
5679	TGCAGGATGGTGGCCCTGAGGACCAGGATTGGACACCCCTGCCTTAGACCTTATGATGGCATGGTGGAGCAGTGGTTAGAGAAGGTCGCAGGTTTC
5682	TGCAGGTCTAACGATCCTGGTGTTTTTGTGAAAAGGTGGCAGACAGCAGGATGTGTTGAAGCCAGAGCTGCTAACAAGCTCTCGAATCAGATAATC
5693	TGCAGGTTTTATAACATCTCGTTGTTGAGTCAACACGCTTAAATTCACCTGATGTGGCAGGAAGATAAAACAAAAACATTATAAAATGAAATGATT
5704	TGCAGGCGGCGAGCTGCAACAGCCTCTCTGTCTGCTGTCTGCTTCTATGGACAAAACCATGATCCTCTGGGCTCCCGAGGAAGGATCTGGAGTCTG
5708	TGCAGGACAGTGGTCCTCCGGGACCAGGACTGAACGCCACTGTCATAGACTGGAGTGTTTTGTTGACAGTGTCTCCGGAGGGGTAAGACATTTGGA
5715	TGCAGGTACCTTGTATGCACCTGGTACACACCCTGTAAGTACTAGGTACGTACTCAGTCAGTACTTGATACATAGCAGGTAAGAACTAAGTACATA
5716	TGCAGGGATTCGTGACTCGTCCGAAGAAGAGTTAAGTTATTAATTGAGCAAACAAACTCATAAATGCCAACAAATATTGAACATCCTTAAAAACTG
5718	TGCAGGGGGGCCTGGAGCACGGGGAGCCGCTCATCATCTCCAAGGTGGGTGTCAGCAACAGGAGAAACTCCACAAGTTTTTTAAAAAAAGTTTTCA
5719	TGCAGGGCCATCCGACACTCGTGAAAGACAACTTTCTGCTCTGAGTGAGTCGGGTGACCAGGCGTTTGGATACCGTCGCATGCAGAGATTCAAGCT
5724	TGCAGGTTTCATTAAAATTCATCCAGTGGTTCTTGAGCTATATTGCTAACAGACAGGCAAAAACATTATTGTCTTTTGGCACTGGGAGATAGAGAA
5726	TGCAGGGAAACTTGACGGTTGAAGTCTCGTGGTTAAAGCATGTTTTACTTTATTGGGGAATGCCGTCACTGATGAGACAAAAACAAAGTTTGGGAA
5727	TGCAGGGTGGAGGCCCTCCAGGACCAGGATTGGAGACCACTGTTGTATTGTCATAGTTATCAGGTCCCCTTATAGACCTTGATACCAGCTCCACAC
5740	TGCAGGACGGAGGACGACGACCGTGTGACTCACCTGTGCTGAAAGTCTTATCGAACTGTGGGTTGAGGCACCAAGCGCAGGACCAGGCCGTGGATA
5752	TGCAGGTCCTTCTCATGACACTGCCTCTTGAGCACCAGCGTTCTCTCTCTGAGGTCGTCCACCGTGCTCTGCAGCAGCTCGTTCTCCTCGAGCGCG
5769	TGCAGGTATTCAATCTAACATGACAAATAATTTGTTTAGGAATTTATTCAAGATGCTTGTATTTCCAAAAACAGTGTGCTTCTTCTTCCTAATCAG
5770	TGCAGGATCACTTGGAGCTTTACGTCCAGCAGCAGTGCACTCAGCCCATCACCTTGTACAAGGCTCAGAAACCTTTGCATATGATTAAGATAGGCC
5778	TGCAGGAAAGTGAGGTGGTCCTGAATGTTCTCTTTGTTTTCCAGGATGTAAGCTTCAAAGTGCATAAGAGCACGAGTGTATGCTTTGGATCGCAGG
5794	TGCAGGGGAGACAGCTGACAGCCTAATGGCCCTGCGCTACTGTAAGGAGAGAGGGGCTCTGACTGTGGGCATTACCAACACCGTGGGCAGCTCCAT
5796	TGCAGGACAGCGCCCCCCCGAGGAGCAGAGTTTGACACCCCTGCACTGGAAGCACATCTGGAATTAATTAACATCTGGGGTCAATCCAATTCAAGA
5797	TGCAGGCCGGATAAGGAGCTTCTAATCAAAGAACAGCCCGTCCTGTCCTGTCAGGTGTGACGTGTAGATTAAATCCACAGATGGAGGTTTTTATTG
5807	TGCAGGTCTGCATGTGGAGACACTGTCGCCCAACGAGCTCGTTCTGCTCAGGATGTTCGACCGGCTGACGGCTGAGCTGCTCGTCGGTTTGGGTGT
5810	TGCAGGAGCTTGCACTTATATAGGATCAACAGTTCATTGCAGGCAACAAAAGACAAAAAAAAAATAAATAAATAAATAAAATCCATCAACAACTCA
5811	TGCAGGACGTCTTGTGATCTCGTCTGACGTGTCCAAACTCTGTCTCTCTGCTGCAGACGGCACCGTCGTGGCGGAGGAAAGATGCACTCTGATTGG
5813	TGCAGGCCAGCAGAGGCTCCTACAGGCTGAATGATGAACAAACCTTCCTGCAGCTTTTTATTGAGTGAACATGATGTTGAAAACAAACGACTGTAC
5816	TGCAGGTTCACTGGATGCATCACGTTTGGTGGAAGTTCCTTCTTCATGTCGGTGAGAACAGAAGAAAAGTGCAGATAATCTCCAACGATTCCAGCT
5819	TGCAGGACTAATTAATACGACCCGACAAGTGTCAGCACAACAACAAGTCGTTTAAAAGCACATAAACCCTAAATAAGAACCATTGCGTCCACAGGG
5830	TGCAGGATGTGAATCTTGATGCACATCTCACAGTGCGAGACAGAGGACATTTTATCCCAGACTCCAGTCGGACTGTTGGATCTGTCAAAATGCATC
5833	TGCAGGAGGACGAAAACAAGGGACAGGTGTGATGATGAGGGACAGGTACGAAGACGAAGGACAGGTGTAAAACTTGTGACGTCACAAAGAAATCAG
5842	TGCAGGAGAGGACAAGGCTGTGCTGTTTGTGAAAATTGTGGGTATGTGAAAATCTACAGAGTCACCAACACAACGTTGTGTGTTCAAAATTCTCTA
5854	TGCAGGATGGATTGGACACCACTGTTTTAGGCTGTCTCTGCATTTCCTAGGTTTGCCATCAGGGAGTGACAGACACAGGTGCGTGGTTTCCACAGT
5856	TGCAGGTATTGGGCGTACAGGAAAGCAAACCCATGCTGTTCACTTAGGCCAAGTAAGACTAGGCCACATGGGTAGAGGACCTATCACCAGGCACCC
5862	TGCAGGAGTAACAGTGTAATGTGACGTAAAGGTTTATAAAATAACATTTGCATGAACTGCAGCGATGCATTCAGGGTCAAATCTGCTGCGTTCTTC
5863	TGCAGGATGAGTGTGACCTTCCCACTGCTTCGTCAGAACCACCAGCATCAGCTCAGGGTGCACGCCGGGAGTCAGGCTCCGCCCACAGCGGGACGA
5866	TGCAGGCCAGGGTGACTGCAGTCCTCCAACAGTTTCTAATCTACCCTCCGCAAGCATAGTTTATCATCTTGATTTGTTGCATTTATATATTTCTTT
5874	TGCAGGAATGCTCCCCTGAAGACAAACTCAGTCTCTGAATACCAATCAGATCTGGAAGCAGTTCAGCAGCTCCTGTTTCAGCTTTCAACTTTACTC
5881	TGCAGGTTGAGATGTTTTTTGCTCCAACACACCTGATTAAAAGTGACTGATTCATCTCCTCGGTTCTCATCTAGTTCTGCTGGTAATAAACATCTG
5882	TGCAGGGCAGTGTGGCATGAGGACCATGGTTGAAAAACACTAGAATATGATGAGAAGAATTAATATTTTCCAAATAAGCTAAAAATATGCTTTTTT
5884	TGCAGGCAGGGCAGTACTGTGGTCAGATGTCCCACATGTCTGGTGTTGCATTAATTATTCACAACTTAACCTTAATTACTACCTTTTCTGCCTCAG
5887	TGCAGGTCTCCAACTAAATAAAGTTTCAACTTTATTAAGTCTTTTCCCTAAAGTGTGGCATCATAAATTACAGCTGATCCCACTCAGAGAAAGAAA
5890	TGCAGGAGTAAAAAATGAAAACAGACACAGAGTTTGAATGTGCTAAATTCCAGAGCAGCTTCAACACTGAGCAGCGAAAACCGGCGTCAGATGTGA
5909	TGCAGGACCAGAAGTTGACATCCCCTCCCATAAACCATGAAACATGGCTTGTATACAGTTTAAAGAAATGGTGAATGAAATTTTCTTGGACCCTGA
5913	TGCAGGATTCTCCCTGCCCTGCCTTCTCTGAAAGCAGCTTTATCTGAACTGACGGTGTGATCGTGTTGCTGTTCTCAGGCCTGCGGAGTCGACTTT
5914	TGCAGGAGGAGTGCCAGGCCCTGGGATCCGCGCCTGATCAGTACACCTGGCTCAAGCAGACTGAGAGCTGCACGCTTCAGTGCGGCTACGACAGCG
5929	TGCAGGTTCTCATTGTTTCCCTGCTTTTCAGCAGCTCCTTTCTGTCTGCAGAAGTCTGTTAATCACTCCCTCATTCAAATCAGGTGTGTTAAAGCA
5947	TGCAGGATATTTAAAGTGAAATCTGAGGTGATTCTACAGCAAAGTGTCACCTGCCACACAGCAGTCACACACACAAACATTTTTAAACCTTCACAG
5954	TGCAGGATTTTTCTGAGAGTCTGCAGAAGCCTGATGTTTTCTAAGAGTATACAATTTGATAATGATAGTGCATCAAGACCAGAAGGAACCTCGTGA
5956	TGCAGGAATCCAATAGATGACATTGATTACTTTTGTTGTCACCATTTTGTGTTTTTTTCCTCCTTTGCTCTTCTCGTCGTAACTAATATTAAACAG
5961	TGCAGGAGACCGCGGTCATGACGTGAGTCCTGAATTCTGTCCTGAAACCCCACCAGAGTCAAAACAGCAAATAATAATAATTAATAAGTTTGTGAT
5971	TGCAGGAATAAATATGTTTCTGTTAACCAGATTACAGAAAATTCAGCAGTACCGTCTCCCCTCACTCTATAAAACTCACCCATGACAACTAGTACT
5972	TGCAGGCCGGAGACGAGGACCAGGCAGGTGATCTGGAGCTGCTGGGTGAGGGATCGGGCCAGAGCTAAGGTGCGAGACTCAATTACCTGAAGGAAG
5978	TGCAGGTAGTGGTGGGAAAAAATGACAGGGCTCAGCCTTGCCTGTGATGAATCCGGACACAGATAAGATGCTTCATCCTTGTTCATTTGATATACC
5980	TGCAGGCAGTTATCTCTTTTCTCTTCTGATCTGGGAAAGAGGGTCTCGTTTGAGAAATATCAACGATCCTATAAATGGTTCTGAATTGGAGAAGTG
5994	TGCAGGACGTCCCGCTCAGAGCACGCGACGTGGGCGGCTCTCGGCTACCGCCAGGCGTTGCTATGTTTTCTGACGTCGGCTAGCTGTGGCAGACAT
6000	TGCAGGATCCACTTCTCGTTTCATCACTAAAGTTTGTTATAAAATCAGTAAAACAGTAAATGTTGGTGCTCAGAGACAGAGCTTATTGAAATAAAC
6005	TGCAGGGCTACTGACTGATATTGATGTGCAGGTTAAACCCTGTTTATGAGTGGGATTAAAGAGTGAGTGTGTCGCCAGGGCTTGTTTGAGAGGATC
6009	TGCAGGACAGACCTGACAGACGGCCGGTGCACCAACTGCAACACAAACAAGTGGGACTGGGGGGACACAGAGAACAGGAGAGAAAACGGGTTCGGA
6010	TGCAGGTTGAATGGAGAAATTGACACGCCTTGACAATCAATCATCCTCATTATTGGCTGGTTTTGAGCTCAGAAACAAAAAAAACAATTTCTCTGA
6011	TGCAGGATGGACACCACTGATACAGAGGATGAATGGGTTGAGTGGTTGTTTCGGCACCATTACACCTCTAATAAACAGAATATATTGTGTAACTAG
6012	TGCAGGCCGACGCTCGGATTGTTCTGACCCATCTGTGGAGAACAGGAACACAGGAACAGGTTCACCGGGCCTCTTGGGTTCTGATGCAGTCCCTGG
6016	TGCAGGCCAACATATCAGCTTTAGGTCAGACACAGATGAGTTATATTCTAATTATGCAGCTTCCTTTTCATTGTTTTTATTCGTAGTACAGTAAAA
6019	TGCAGGGGGCGCTACAGGATTTATCCAAACCTCTGTGGATTTAAAACCCTTTTTCTGTGGGTTTGTAGACTATAACGTTTATTTATTTTGTAATAA
6025	TGCAGGAAGGTCTGTACGGTCGCCGTCCGTGCGCACGTGGCTTCGGGTGTTTGGGGCGTCTCCGAGAAGCCGCCAAGTTTTATCTGTGTTCATGAA
6027	TGCAGGACAGATTTGGAGCGCATTACATTTTTTTTTTTTTCTCCTCCTCTCTACGTCGTAAGACGAGATGAGTGTAGTTAAGATCAACGTGTAATA
6033	TGCAGGAGCTGAAAGTTTGGGTTAAAATGGTTCAAATAGTAACAGTCCAAAAAACTACGAACAGGAAAACAACGGTGTGAACGCTGACTCAGCATA
6035	TGCAGGAGGGGGTGATGCTTCAAGCTCTTAAAAAAAGTTTAAACGGTAAATAAAAATAAATAAATAATCGTAATGGTTTGCAGGCCTGAGTAGCAC
6036	TGCAGGATGGTGGCTCTGAGGACCAGGATTAGCCACCCCTGCTCTAAGCGGAAAGTTTATTTATGTTTATATCAACATTGCTCTGTTATAGTTATA
6042	TGCAGGTTTTAGAAGTTTCTCAAATCTTCAGTAGGTCTTCATGTCTGCAGCAGCCTGTTAATCACTCAATCATTCAGATCAGATGTGATGAAGCAG
6044	TGCAGGTCGACCTCACGTCAGATTGGGGAAGCTTTCAAGTGTCGCACTTTAATGAGCCATTTCAGACTCACTGAAAGAGGTTTTGTCAAAGAAGAA
6054	TGCAGGATAAGGGGAACCAGCTGAAACAAACAAACAAACAAACAAACAAAAAAAATGTGTCTCTCTGGTAAAACATTTATCTGCCTGACTCATGTA
6058	TGCAGGATTTCAGCAACGAGCCGAGCTCCAACCTCACGTCCCGCTCGCTGGAGAAAAGCTCAGCCAGCGCCGCCGCCGCCGGGGACAAAGCGGCGG
6067	TGCAGGATCAAAAGTGATTCGTCTTGTCTTTTAACCCCGCCAGCTTAGTGGTGACTTCAACAACTGGTCAATCTAAATTTGTTGTGTAATTTTTAG
6096	TGCAGGTTTTGGTTTTGTTCTTCTCATTTAAACCTGCAGTAATATTTGGACCTCTTAGTATCAGGACATGTAGGAATAGATGTAAATAATCTCATG
6097	TGCAGGACTGATCTGAGTTCAGATTTGAGCCCAGGCTGCAAGCTGCAGACTGACCAGCAGATGTCGCTGTTGATCCACCAAAATACTGTTCAAACT
6106	TGCAGGGTTTGTCTCCACATTACAGTAATCAGCATCCTCATCTGGTTCAAGAGGCCTCCCTGTTAGGATCATCAAATAACCAAAAAAGAAATGAGG
6112	TGCAGGCATGTCACACCTGCTGCGTATGACATGAGAGAACTACATGTCCTGTGCTCTTGGCTGGATATCTTGGAACAGTGCGTTTTTGTTGAAGAA
6122	TGCAGGAGGATCAGCTGTTTCCTGTCGGGGTCTGTCTGTCAGCCAGAGTTCCTGCCAGAGCGCTCCATGTCCTGGTAAGACTGTCTTCACTGGACC
6131	TGCAGGCAGCAGAATAATTTCCAATGCAGAAAAGATAAAAATCTCAAAAGAAATTTGCAGATTTAACCAACTGTTGTGTTTAACATAAAACAGCAG
6132	TGCAGGAGTACTTACAGAGTACACACCAGGTGCTGACAGGAGTACTTTTTGAGGTACTTATTGGGAATATACCTGGTAAGTACAGAGTACAGGCTG
6133	TGCAGGTGAAAGAAAACCGTCAGAATGAGAAAAACTGTATTTGCAAAAAACTGGGGGCTGAAATCTGTCGGAGAATTAATTTTTTTATGTTAAGAC
6137	TGCAGGTCAATAATATAAACCAGAATGTGAAAGTGATTGCTACAGGCCCTGGAGAAGCGTCACTGACAGTGAGTAAAATGCAGGTTTATCATCTTT
6144	TGCAGGATGGTGGCCCTCCAGGACCAGGATTGGACACATCTGGCTTAAACCGTGCCCTGCAGACGAAAACCTCATTATAAAAACACACTGGTTTGG
6145	TGCAGGAAATGAAAAACTTCTTCATCTTACGCAATCTCTCAGTTGTGTATAAAACACGTGTGTCAGGCACAGACCCTGAACAGCACAGATGCATGG
6147	TGCAGGGAGTTATGGATCTGCTCCAGGGTCTCCTCTCAGTGGGATGTCACCTCAGCTGCCTCCTTTCTATGAGGAGGAGCAGCAGCTCTCCTCTGA
6152	TGCAGGACGGTGGACCTCGAGGACCAGGACCGGACACCACTGATCTAAGAAATGTCCCACATGAAGGAACGTTGTCACCTAAGAACCCCTCCTCTG
6159	TGCAGGGCGGTTTCAGCTCGGAGCTGCTGGAGGTCCAAAGATGTCTGACAGAGCAGAAGTTTCAAACACCAACATTTCAAACACAGACTTTTACAA
6163	TGCAGGGTGAATCAGGGAACATCTTTTATTTACCTGGAAATAAGTCTGCTTGATGGAATTGATGGAGTTACATTGAATTTAGGCAAACCTTGAAAA
6166	TGCAGGTAAACAGACGTCAGAGGACAGAAACCGCCAGCAGGAGGCGCCGCTGCTCCTCCTGTCAGACCAACAGCAGCGTCCTCCTCAAGGTTTCAC
6186	TGCAGGCCCAGAGCAGAAACAAACAGCTGGGACTCGGGTCAGGTTTTAGATAAAACTGACTATAAAGACTGTTTGTCAGGAAATCAAATCAGCTAA
6192	TGCAGGAAAACATACAAACACAATATGGGATTAATCATCTAGGATTCCTAATCCGAGGTTTTAAATCTGGGGATTAGGCTGTTGGGCAGGATCCAC
6200	TGCAGGGCATTAATAATTAAGACAGTTGTTAGTTGTTAGTTAAGTCTTTATTTGAACCCTGCTAAAGTGAAGATTATTTATGTTTTATTAAGTATT
6203	TGCAGGTAGTTCTTTAATCTTTTTAATCTATTCTAAATAATAAAGTGTTTGTTTGTTAGTTGGAGTATTTGCAGAGTTCCTCTTTGATTGGTGATG
6205	TGCAGGCTGTAACTCACAGTTTGAATCGCTCCGTGTCTGTATATCCATCTGACTGTCAGCATACCTGAGCTGATACCTGGCTGTTTTATCTGTTTT
6219	TGCAGGAAGGAGGAAAAGACTCCCTGCGCTTCCAGAAACTTCAAGCTGGGAGTTTCACCTTCCATTGTCACGGCAACGACAACACCTCGTGACACG
6220	TGCAGGAATTCTTCGCCTCTGTAAAGTTTGATCAACTCCACTTGAAAGAAAAGAAAGGGAAAGCTTTGTTAATCCTCAAGGCTGCTCAGAATAAAT
6234	TGCAGGAGACGCTGCTGCTCAGATGACTTTCCTCACTGACTAAAGTTCAGAACCACAGTCAGCTGAAGAGCTCACACACGGCTCATACCATCAGAT
6238	TGCAGGAAAGCAGCGAGCAAAGGGACACGGGTTCATGGCCCTCGCAGCTGAAATAAAGTCAATAAAAGTAATCTGGCTTAAGGATTCTCCGGGTTT
6240	TGCAGGTAATACTGGTACCTACAAAGACAGGAGGGGAGTTTGGTAAAGAATTTTTTTAAAAAATGAGAAAGAAACAAATTTCTTTCAGTTTACTTC
6245	TGCAGGATCAGAAAGTGAGAAGTCAAAACGCAGAAGTGAAACCTGATCCTGAGACAATGAAAAGATAAATGTCCCACCTTTTTATCCTCCAGTAAT
6250	TGCAGGGCAGAAGTGCTTCCTCAGCGCTCTCTTTGCCCCACGTTCTTCCTGAAAAGCTTTTACGGTTATGTCCCGGTTCTGTTTTCATGTTTCCTC
6264	TGCAGGGAAATGTTTAATTACCAAGAGTAAAACTGTTCAACATTTAATTCAAATGCTCAGTCATCTTCAGTCAAGGTTTTAAAAGCAAAACTCTAT
6273	TGCAGGTTTCATTAAAATGTGTTGAAACAGACAAACACTGGCGGTGGGTGATAAGGAAGAACTTCTCAGACAGTGCTGATGGTTCTAGTCAGTGAA
6278	TGCAGGAACTGGGGATCGAACCCTCGATCTTCCGACCGTATAGTGACCTCTATGTTCATCGGTTTATCATTAACTTTGTCTCTGCGGGACAGAGCA
6284	TGCAGGATTATGAGTAGGGCTGCTACACCAGAGATTAAAAAAAAATTTTCATTAAAAACAGAAACTACTGGCCTACTTTGAGCACTGGCTGTAACT
6299	TGCAGGAGCAGTTCTCCTCATCAGCAGTTAGAAGCAGAAAGAGTGATTTCAGTCAGGGACGGGTGACTGTGTTTGGAGTCTCTGTGATTCACTCAG
6301	TGCAGGGTGGTGTTCCTCAAGGACTGGAGCTGGGAATCGCAGTTTGAGATGGAAGCGAAATAATCATCAGAGCCGTGCTTTCACTCGTCGCTGCAA
6305	TGCAGGGAGCTGACGCGCCTCTCCAAGGCCTAAATTATTAACCATCTCCACTGATTACAGGTTAGGAATTAAAGGCCCAGCATTCCTTGAAGGAAT
6310	TGCAGGTTTTAGATGTTTCTCTGCTGGGAATAACAGGATTCTGCAGAACCTGAAGAGCAGAGAAACATCTCAAACCTTCAGGATGGTGGTTCACCA
6315	TGCAGGAAACGCTCCAGAGCTTTTCCATCTCGGCTGTCGGGAGAACGCAGAACAAATTATCACCAGAGCGAAACTCAAACTACAGCTCCATGTCTG
6318	TGCAGGGCTCCGTGAACAGCGCACAAACCTGAGCGCGCGGTGGAGGCGTTTATACTTTGCGCCTACCTCGGAGCAGTATTCTCCAAAAAGACAGGG
6319	TGCAGGGCACTCAAGAGAGGCATCATCACCGACAACAACAAAAAAATACACACACATAACCCCCCCCTCAAAAAAACCACAAAAAAACAAGAGAGG
6322	TGCAGGGCCGAGACGGTTGGGACCACCGAGAACTTCTGCCAGGAGAACCAAACCTGGAGGTTCCCCCACCCCGTGTGTAAAAGTAAGCATGGCGCC
6330	TGCAGGTGTCTTCACAGCTCCTGCTAAAGGGCTCTACTACGTCCAGATCACCGGGATGGTCGGCAGTTCAGGGACACTGAACGCAGGACTGAAGAA
6332	TGCAGGTGAGGCTGGCGCAGGAGACCGTACAGCTCTCGGGCCTCGTCAGAGCAGCAGGGCAATGATCTGAGGTCTATCAGCAGCTACACACAAACA
6341	TGCAGGGTCCAATTTGGGACCAGTGCGTTTTATGACTCACCAAGTTGAACCAATCAACAGGAAAACACTGCTTTGCTTGCTTTCGATTCAGAAATT
6350	TGCAGGATGGTGGCCCTCGAGGACCAGATTTGGCTATCCCTGTCCTAAACTACAGCCAGCTAGCTCTTCCCTTGGGTTGCATCTCAAGAGCCCAGT
6352	TGCAGGAACAGCCGAAGTGGCCGAAGTGTCTGTTTACCTGCAGAATCTTTTTGAAATGGAGAACCTCCACCTGACGTTCTGCTTGTTCACTCAGAC
6355	TGCAGGAACAGGGACACAAGTGGGCCACGAGCCACAAAAAGACCCCTCTGATCTAATTATAAACAGGCCTATTAATCTGGAACACGTCACCATCAT
6357	TGCAGGTTTGGTTCATCTGTGACTCTAAATTGTCCCTCGATGTGAGTGAGAGGGTGAATGGTTGTTTGTCTCTGTGTCTCTGTGATGGAGACCTGT
6368	TGCAGGACCAGGATGGGACTCCACCGCTCTGTGCTCACAGCTTCTGCTACACAAACATCTGAAACAAATCAGACATTCTCCAGGTTTTGTCACTTC
6371	TGCAGGATTCCCTGTAAGTTCTGGACTTTCCTTCCTACGACGTGAGCAATGCTGATGAGCAAAACAATATGACTCATTTCTTATTAAATCTGACAA
6378	TGCAGGGAGGTGACCGTGGAGACGTCCTTGATGCGACCTTCCTCGTCCTTCAGGTTGTATCCTTCTGGCCGTTTGTCTCGCTCACTCACCTTCCAC
6379	TGCAGGTTTAAAGATGTCTGGACTGAAAATGAAAGTCGTCTTTTATTCTCAGACAGGTGTTCATTCAGACAGCTGCAGCAGACAGTCAGAAACTTC
6381	TGCAGGATTCAGGAGTGAAGCTGCTTTCTGCTGCCCTGAGGAGTCCACACTGTCACCTGGAGACTCTCAGGTCAGGATGTATTAGTGTTGAAAATT
6385	TGCAGGGCTGCCATGTTGCTGCGAGCACAGGCTGGATACTCCGACAAACCCAAGTTGCAGAGCTGACTCTCTCTGCAACCCACGTTGAATGTGTTT
6389	TGCAGGAGGCGCTGCCACGGGACTACAGAGTCAGATAGTTTTGATCTTTGACTAAATCTATTTTCTACTAAATGATTTATTCAGACTCAAAAATGT
6390	TGCAGGAAAGAAGCCCGCGTTTCCTACGACCTGTGAACGCATCGCCTGCGCCTCCTTCACGTTTCGGTAACTTCCTGAAGTCCGACTTCGTGCTGA
6396	TGCAGGACGAGTCAGGGTCAAATCCGGGTCGAACTCGAACTCGCCTTCTGTGAGGACGGCTCGGACTCTGACCTGGGAAATGTTGATCTTCGAGCC
6398	TGCAGGATCCCGGCCCGACGCAGCATCAGAGCCTAGGGCCCGTGGGCTCCTCGCTGCTCTCGAAGCCCCCGGCCTCCACCTCCACCCTCCCCAGCC
6402	TGCAGGAATTGGATCATAACTCAGGGACTAAAAACCCCAAGCAACTCACATGGGATGCTGTCTTCAGGTAACCCACCTCTAAGTGTTTGCTTTTTC
6403	TGCAGGAACACAGAGGGGATCCACACGTTGATGAGTGCACGGTGAGCCCTGAGGGACACAAACAACAAACGTCCTCACTGCCGTCGTCATTATCTC
6405	TGCAGGGTTGGATTAGGTAGACAGTCTCAGTAATTATCATAAAAATGCAAAAATCTCCACATTAACAATGATAAAGTCAGTAATGAGTCATTTATG
6411	TGCAGGCAGCCAGCAGCAGACTAACATGTGACGTCTGCAGAGAAATGAAGCTCACGTCTGTTTGGTGTTTTGCAGGTACGTTCCTCCGCTGATGTG
6415	TGCAGGACCAACGGGCCCTGGGAGGCCTCTTGACCTGACTTCCCTGAACTGGCCTCTGCAGGGAGCCGGCTCTTCTGGTTTGAGACCAAAACTTCC
6426	TGCAGGAAGACTATGTCCACTTCCCTGCAGTGCAGAAACAGGTTCAAGGACAGCAAGATTTGTCTTTTTTTTGTTATTAGAGATTTTGTGTTTTGT
6457	TGCAGGAAATGATAGGTTTGTAATGAGTTTTTCACTTTTTATAAGTTATTCTTGCAGAAATATAATTATGCTGCCAGGAGAACTTGGGCTTCAGGG
6459	TGCAGGCGGTGGTCCCACAGGGAGGTGGCTTCCTGAAGTTCTTTCAGGCTTCGGTCGACTAAGTCCCAGAAGCCAAGGCTCAACCAGCAGGCACTC
6462	TGCAGGTGCTTTTTTTTTTCCTGTCGGGGAAGGGAGAGGGGGGGAAAAAAGCAAGTAAAGTAAGTGTGTGTGTCATAGAGTGTGTGAAAGTGAGCC
6473	TGCAGGAAACCAGCAGAGCTGCTGCTAACAGGACGACTGCGACGCCCAGAGTCAGACCAACAATCAGAGGAACATCTGTAGAGTTTGAACAAGTTG
6479	TGCAGGAGTGCTCGTGTTTATGTTTGTTTATCGCACCTGCCGTCACATGAACCCCCTCTCTTGTTTTTTTCTCTCTCTGTCTGTCTGTCTCGCTGT
6482	TGCAGGAATCTCACCATCTCCCTTAATGAACAGCAGGAAGTCCTGGATCTCGGTCAAGGCCTGCACCGACTGCAGGACGGTCAGTCGGCTCTGGGT
6486	TGCAGGTGAGTCGAGGGTTCGTGGCGTCTCGGAGCCGATGGAGCAGCTTCCTGCTTCCTGTTTTCACAGTTTCATGTCGTCCTCTCCTCGTCAGAT
6507	TGCAGGCGTCCTGTTACCTGAAGCAGGGCAAGTTCAAGCACGCCGAGATGCTCTACAAGGAGATCCTCACCCGCGCCCACGAGCGCGAGTTCGGTT
6523	TGCAGGTCTTTTTACATTTAATCCCTCAAAGGCTCAAGTGCAGTCACAAGGGCATGATTCCTGAAAAGCTCCCACCTTAAATGTAAACTACGAATT
6524	TGCAGGTTCGAAAACAGAAAAACGTCTGATAAATAAACCTTTTTATGTTCAGTTACTCAACAAACTTACATGCATGTGAAAGTTTTAATCTTGCCT
6525	TGCAGGTTTTCCTTGTTCCTCTGCTCCAACACACCTGATCTGAATCAATGGATGATTAACAGGCTTCTGCAGAACATGAAGAGGTGAAAGGAAACC
6526	TGCAGGGTTATTTCCATAGGATTACACACTTAACAAATCAAAGCTGACTCTTTTGTAATCAAGAAAATCTTCAAAGCAATGGGCTAAACATAGTTT
6527	TGCAGGAAGTTGTTCGCAGGCTGATAGAAAGCAAGCTGAGGTCATTAGAACTGAACACCTGCTCGCCGGAGTTATTCTTTAACTGCTCCTCACACA
6534	TGCAGGATGGTGGCCCTCCAGGACCAGGACCAGGACTGGACACCGCTCTGTGTGAATCCAGCCCCAGACTGGAACCAGCAGAGGTCAAAGGTCGCT
6535	TGCAGGTGACGCCTGGCCTTTCGTGCTGTTTGTGCAGCACAGGAGCTGCTGATCAGCAGGAGGGACGGGGCGAGGAGACGAGGACAGTCGGCGAGG
6537	TGCAGGGCAAACAGAGAAAGAAATCATCTGCTGACCCTCTCTATCTGTCCTTTCTCCTGGTTGTTCTTCTGCTCATTTCTGTCGGCCTGTCTTCAC
6541	TGCAGGAGCTGTCGGCCCAGCTGCTGGTCAGCACCAAACCTCAGGGCCTGTGCGCGCCGGAGCGGACGTGGGCTCAGAGCAGCGAGTGTCTGGAGG
6544	TGCAGGAAACACGAGACGTTACTCTCAGAGGACTGTTGATGTTTCGGGTTCCGAGTTATTGAACCGATTTTACTGATTTCACCAAAAAATGCTGAA
6546	TGCAGGTTCTTTGAAATATTTTTACTCGGTGCAAAAAAAATGTTTTTTGTTAAAACTAAAAAGCTGACTGTTTCAAAAAGCTGCAGGTTTATTACG
6547	TGCAGGAATGCAGACGAATATTGATCACACTGTAAAGTGTTCACTAACAAAAAGCAGGAACTACAGATAGTCTGGCATAAAAAATTGATGAGCTTA
6556	TGCAGGGATTCTGAGTTGTTTTAAAAGCAGAAGATCATTTATTTCCCACATGTAAGCTTAACCATTTATCATACCTCTTACTGTTACACCCCTGTA
6557	TGCAGGCTCCCTGCAGACACAATCAAACAAAAAGGGAACGTTACCATCGCAGTTTATTCAGTGTGTATCATCAGAGTAAACCTGATGCAGCTTGAC
6561	TGCAGGATGGTGGCCCTGAGGACCAGGACTGGACACCCCTGTTTAACAGTTTTCACCAGGCAGAAATATTTAAATCTTTAAAACTTTAAATCTGTA
6563	TGCAGGATAGTGGCCCTCCAGGACCAGGATTGGAGACCCCTGCTCTACTCCAAACTCCACCCGGATGACGGAGCTCCTGATCTTATCTTTAAGGCT
6568	TGCAGGGAGATGGCACGTCATCAGAAACACTATACTCTGACAGGTGAGCGTCTGATGGACAGCTCCACCCACCACTGGCATTTCCAGGCTCCTTTG
6572	TGCAGGGAGAACTTGGCAGCTCGGCGATCCTACTCCACCAGAAAGCGTTGTCAGGGGCAACAGCTGAGAGAGCCGCTGCGTTTTTGGACCTGAAGT
6573	TGCAGGAGAAACACACACCATGAAAGCTCTGAGGCTTTTTATTTTAAAACAGCAACTCAGAAAACACTGGGATGTTGTTTAAAATGTAAATTAAAA
6586	TGCAGGGAGCGAGAACCTCCGGCTCCAGGGAGGAACATCAGAAATCCAGCAGGTTTGGTTTGTTTCTGTTTTTGATAATTACAACTAAACACACAA
6588	TGCAGGTAAGACACTCACTACTCATAACTTCTCCGCTCAAACCCACTTCCAAGAATCGAAAGTAATTTTTAACATATACAGTAGATGTCTCATATC
6594	TGCAGGTAGTGTTGTCTTTACTGCATGGAGAATACAACGTAAGAATAAAAGACCAAAGAGACTGCAATGATTGCACAGAAGAGACCTCTGCATCAG
6595	TGCAGGTCGTCTTCTTCTGACCCCTCGGCCGTCCCAGGGGGCGCCACCTGAGAGCCCCTGGCCAGTGAAGACTTCCCCCCGTCGACCTGCTCATAA
6613	TGCAGGATGGAGGCCCTGAGGACCAGGACTGGAGACCCCTGGCTTAGAACGATTCTTTCGGATGAAACCAGGTTCTCGTTGGGCTGTTGGAAACTC
6629	TGCAGGTCAAAGAGACAAACAGCTAAAGAGCAGAAACACCGTGAGTTTGTTTCCAGGGTTTTAATAAAGACGTCCGTCAGTTTCCAGCAGGTCAGG
6632	TGCAGGGGTCTCCAATCAGCGCAATGCGCCAGCCTTTCAAAGTCATCCAGGGCTGCCTCGGACCACAAGTCTCCTGAAACAGCAGGAAGCCCAGTG
6635	TGCAGGCTGTTAGAGGCTCACAATAGGATGGCTCATTCCACATGAGAGTATTTACTGAGGCAACACAGATGAAAAGACCCTCCTCCTCCTCCTCCT
6638	TGCAGGGACTCCTCAGTGTCTGTGTCCCCCCTCTCTGTCCCAGGATCAGAAACAGACTGATTCAGTAACTTTCTCTCCTGATCCTTCAGATCCTGG
6647	TGCAGGTGATTGACACTGCTGACGGTGAGGTCAGTTTGGCGTGGGAGGAACCAGAAAACGATGGAGGCAGTAAAGTTATCGGATATGTTGTGGAGA
6650	TGCAGGAAGGGGAGTCAAGGTTTGGTGCCGTCTGAGGCAGGTGGCAGGTAAGGGAGGGGCCCCGGACACACTGGACCCTGGTTTATAAATGCTGAC
6658	TGCAGGATAGTGGCCTGAGGACCAGGATTGGAGACCCCTGCCTTAGTGTCTTAACTGTACTGAGTTGAAAGGTTTCGTTCCAAATTTAACTGCCTC
6660	TGCAGGGCGCTTCCTGTCGACATGCGATGTGCACGCAGCCGAACGCAGCCGCGAACAGCCGGCCGCCTGCTGCTGACGATGTGATGTTGATTTAAC
6667	TGCAGGAGTCGCCACAGCGAGCAAACTCACGTGGAGGACCCGGGCTTGAACCTGCAGCCTCAGGAATACGAGGCCACGGCACTGACCACCGCTATA
6670	TGCAGGATGGACTGATTCAGGCCGCAGATGGTTTGTTGTCACTTTGAAACCTGAGCGAGCGGTTTCACCTGCAGCGGCCTAACGACCGGTCTGAAA
6681	TGCAGGAGAGAAGAAAGAGCCATGAACAAGATGCTATGAGAAATTATATGTGACTTTAAAAGAAAGAAATAAAAAATAAAAAAAAAATGCTGGTAA
6689	TGCAGGAGGCATCATCTGTTTTCAGCTTCCTGTCCTTTCACAATAAAACGCTCCTGGTGAACAGCTGAAGGAACAACACTTCTGTCCTCACCGTGT
6695	TGCAGGGATAATGTAAAAATATCTGCTGGAATAGCTGAGTGATGCAAAACTGACAGTAATGTAAGGGTTCAAAAAAAGTGATACCATAAACTTCTG
6697	TGCAGGAGGGAAGCAAGACGTTTCACTCTCAGCCTTCAGTACGGAAGCCCATCACTGCCATGTCAACAAAAATATTAAACAAACGTATCATGTACT
6716	TGCAGGGAGAGCATTGGCTTGGCAATGCGGCACTACACGCCCTCACCTCCACCGGACAACACCAACTCCGCATTGAGCTGGAGGACTGGTACCAAC
6721	TGCAGGCGATGCATCATTGATACTGATTGCATTCATACCCATGCGTGTCACACTGTGACCCTCATTACCTCAAAGACAACGAGCTCTAAGAAAAAT
6736	TGCAGGATGTTTTTACTGTGTTCATAGTTGATACAAAAAGTAATTTATGTCCTGGGAATTATGATGGAAGTCATTAAAAGCAGAAGGTGGTGAAAG
6739	TGCAGGAGCTGCAGTGAGGAGGGCAACTTGACCTGATATCAGGAAGTAGACAGATACTTTTTTCATCACAATTCTGCAGCACAGAGTAAAGATCAA
6741	TGCAGGGGACATAAAAGAGCTCAATCCCTCATTCTCCACAAAGCTCCATCCTTCCTAAACATACCTCTGTACTGGAAATATCTGGATGATGATGGC
6756	TGCAGGAACGAAGAAGAGGAGGACGAGGAAGAGTCAACATCATTTCACATCACAGAGTCCTGCTGTGATGAAGAGCTGGTCATCTTTATGAAAGGA
6763	TGCAGGGACACAGAGGGACGGAGTCTGGTGGAGTTTAGGGGGTCCGAGGGGCTCAGCAGCAAAAACTCGCTCAGAACTTCATATCTGCTGTTTAGG
6771	TGCAGGTATTGTTTCTCTCTAAAATCATGTGCGACATCAGTTTAGACTCAATGTGCAGACAAATAACAGGCTATCACTAATTCATTTAATTAAAAT
6780	TGCAGGTCAAAGAGCAAAGAAAAGAAAGAAACTTGGTGTTTTGTTGTCGTTACGAGACATTTTTGGGGACAAACGATGACAGAGATGATGATGTTT
6781	TGCAGGAAGGACGAGACGAGCAGAAACCGTTATCAGTGAATGTCTTACCTGCTGCAGATAGCTCACTGAAGCAGCTCAGGTTGGAGTAATCGTTGA
6783	TGCAGGATGCTGAGGAGGTCACTGTCAGCGTTTATCAGGGAAATGGCAGCAGAAGAAGAAGCAGGTTTGGTCTGGAGTGATGCTGTCGGGAACTGG
6787	TGCAGGACCTCCACCTTCGATGAGGGACAACGTCCTCGCAGAGACCCTCAGAGTCAACCGTCCCACCTCGGAGGAGGAGGCGACACAGCTGGACGG
6796	TGCAGGTTAAGGGCAAAATCAACTCCATCATCATAGGTGAGCCACCTGGAAACCAGAGGAACTGAGTGTTAAGAGACCTTGTTGATATTTGTGGAA
6804	TGCAGGCTTTGCATTTTTACAGCAAAAATAATTCAAAACAAGCGGAAACTTTGCAATCAAAAGTTGCATGACTTTAAAAATAGTTCTACTTTTGGT
6806	TGCAGGACTCTGACGTTCTGCAGACGTTCCGCAGACGTTCTGCAGACCTTCAGTCCGACAGAAACAGGTCCGAGGAGGAGCCCTGATGTTTGAAGT
6807	TGCAGGCTACAAACACTGTCACCCTGCTCTCCCCACCACTACTGTAACCCAAGACCACCTCCGTTCACAAAGCTCCATACAGCTCAGTGACAGCGG
6829	TGCAGGCTGAGAGACGTCTTTGTCCTCAAAGTGGTACTTCCCTGTCAGAAGACCACCTGGAGGTAGAGGAGTCGAGTCATAGAGCTGACAGTCATC
6832	TGCAGGGACTGATGAGGAACTCTTCTGACTTTATGTCCTTTCTGATTTTAGCTGTGTGTGTAAATGTGTGTAAGAAGAGCTGGAAAGGACACTCAT
6838	TGCAGGGCAGCTCCACTGAGCCGTCTCTGGAGGAGAAGTACCGGCTGCTTGGCCCGACCGACTCACCTCTGGGACACATGCCTGACACATAAGCTA
6845	TGCAGGATGGTGGCCCTGAAGACCAGGATTGGACACCCCTGATGTAAATGTGTAAAGCCATGAAGCTGGTGTGCATTGAAACTAAATGACCTCAGT
6851	TGCAGGCCCTCAACGACCGCTTCGCCGGCTATATCGACAAGGTGCGCAACCTGGAGATGCACAACCGCAACCTGGAGGCCGAGGCGGCGGCGCTAC
6862	TGCAGGCTCTTGGCTTGCTGCAGGTCGCAGGGAAAGCCGTGCAGAATCCAGCCTCTGCAGCTGCAGTCCACCTGGCTCAGCCGCTCCTCCAGGACC
6872	TGCAGGCACCAGACGGAGCAAACATCGTTTCTATAAACCAAACATTTCAGGCGCTCCGTGTTTATGTTCACAGAGCAGCTGCTTCTTCGGGCAGAT
6877	TGCAGGGCGTCCATGGGCTGGTTCTGCTGCTGGTACAAGACCCTGACGGGACGGGAAAAGGAGGCGGCGGGTGTCGGGAACGGGCCGGAGAAGCGG
6895	TGCAGGTGTCACCTGAGTGTCCCTGTGGCTCTCCGAGAAGCTCCTCCTCATCATGTCTGTGACTCTGAGCGCTTCGACCCGCAGCAGGTTCAGGAT
6902	TGCAGGTGGGTGCCCAGCACAGGCAATGGCAGTGATTGGATCGAGGCTAGAGTCACGTCTGGACGCTGACCCGTGGTCCTGGCGTGCTAGAGCACT
6914	TGCAGGTGGTACACAGCAGCAACAGCACCAGATACGTTCGAATCCCTTTATGCGTTCCTCTCTGCTCGTGTTTCGTTCCTGTCTTCCCGTCCCTAC
6916	TGCAGGATGTTACTTTTGGGCTGTGTCCAGGATGCGTCCCTCCACGCTCTGGCTCTGCTTCTGCTGAGCAGACAGCAGGTATCTGTCTTTCATCAG
6917	TGCAGGGATATCAGGCTGATAAACAAATTGTTTTTGTATAAATTCCAGCTATGAAGAAAAATGCTTGTTTCATAAAAACATATTGTAAAAATGAAA
6919	TGCAGGAGGGATTGGGTTATAATTGAGGTGGGATCCTTGTGTGCAGCTGTCACAGAGGCCTGCTCTTGAGCTTCAAGGGGTTCGGGACTGCTGTTG
6924	TGCAGGATATTAGCATTTAGATGGATGTTAACCACTAATGTTTCTCTGTCTGTTTTAATCATTTAAAGGGAGTCCATGTTGAACTTTCCCATATCT
6927	TGCAGGATGGTGGACCTCCAGGACAAGTACTGGACACCGTTAATCCATCTGCTTGTGGTGAACGTAGGACGTGTTTGTTGGTGGTCGATAAAAGCT
6930	TGCAGGGGGTGACGTAGAGGTCCGTCAGAGACAAACCAGATTTCTGAGGCTCTTCCATCCAAGAACAGGAAACGTTGAGCAGATCCAAAACAGTAA
6932	TGCAGGACGTGGACAAGGCGGGACAGGAAGTGCTACAGCTAGCTGCTGCTTCTTGTGCTTACAAATAATCACAAAAGTCTATGTAAACAACCCTGT
6934	TGCAGGAGTACCAGCACGTCCGCATCCTGCAGTTCTGTGACTTGGGGGGCAACAAGGAGTGGTGGCTGGCTGAGGCCAACGGACACAAAGGATACG
6935	TGCAGGCGGGGCAGAACTGCTCTCGGTAACCTGACAGATAAAAACAGGTGAAAACGGTCAGATTTAAGCTGCTGAGAACAGATCTGGGTCAGAGAG
6937	TGCAGGTTTGTTGAAGCCACTACCTATCCACAGTCATCCATGGTCCCACGTCGCATTAGACTTTGTCACAGGCCTGCCCTCCTCCCAGGGTAACAC
6940	TGCAGGATAGTTGCCCTCGAGGACCAGGATTGGCCACCCCTGCTCAAACACAAAGAAATACAGAACCAAACAGGAAGCACCACAAAAAGATTAAAA
6942	TGCAGGTAACAAAAACAAATAATCTCAGCTGCAGCTGTTCTCGTGAGCAACGAATGAGTTACTTTAAGAAAACATCGATACAAATAAGTTCCATCG
6944	TGCAGGTCCCATCTGTAGCGCTCAGCGGCTGGAGGCTAGCCTAATTTGTTGCGATGCACATGACCAAAGGATCCTTTTTTTTATTTGATTTTTTTT
6962	TGCAGGACAAACAGGAACAAAGGATTAGTTCATGTCCTTGGTCACAGCGGCTGATCTCTGCCGGCGAGCGTTCCTGCAGCGTTACCTCCTGACAGG
6988	TGCAGGCAAACAAAACAATAACAATATTTAAACACTGTCAGTCCTTGTTGATATCATCTTTATATAACAATATAGCAATATGTTTATCTTTTAAAT
6991	TGCAGGAGAGGCGGTGCGTGATACAAGCTTTTAATTTAAGATGGATTTTCTCCTGATAAACATGTACAAAATTTGCAACTTTCCTCCGTCGAACCT
6998	TGCAGGCCTGCAAACAAGTGATGAGGATGATGGTGGTTCCTCCTCATCCCGTTTGAAGCCCAGATCTGCAGTGGGCTCCGGTAACCCCCCCACCAC
7003	TGCAGGTACCTCAGGATGTCATGTAGAGAACATGAAACTGGGTCAATCCCCTTGTGCCTGCACCATGCAGAGACACGCTGCCAAACTCTCATTGTA
7011	TGCAGGTCGGAAATGCTGTACATTTTTTTAACTATTTAGGTTTAAATAAGAATTTATGTAGGTCTTTTATTTCCTTTACTGTTATTAACTTACAAA
7027	TGCAGGCCACAGAGACAGGTAAAAAATAATCTATTCTTCCCGCGGTTTCATCCGCCTGACAAATTTGTACAAAAGAATTTAAAAAATTCATTCCCT
7031	TGCAGGATGGAGGCTCTCCAGGACCAGGATTGGAGACCACTGCTTTAAGTTTTGAATTCTTTTTGTAAAACATCATTTTCTGGAAGATTTTTGTGT
7034	TGCAGGGTAAAAGAGGCAGATTAGCTCCACTGCAGCAAAACGTTTCAGTAGGACGGATGAGTCATTTACGGATCAGTTTCAACAAAAGGCCAACTC
7035	TGCAGGTGGTGCATGCAGGATAATCAGATTCACCCCCCCACCCCCCCTAAGTTGGCGGAAGCTCTGGCTCATTTGTGAGGGTGCAGCAAGATAGCT
7043	TGCAGGAGGTACAAGGTTGATGACACCCGTAGGGATGAAGAGGACTCGTCCACCTACTGCAGCAGATTGCTCAAGGTGTGTTTCATGTGTCTGCTA
7071	TGCAGGATGGAGGACCAGGACTGGAGACCCCTGCTGTAGATGGAAGTTTGTTCTGTGGACTCTTGGTGTCCGGGTCAGTTTGTCTTGTTTGATTCC
7077	TGCAGGAATGTCTTATTATTTTTGTAAGATTATCTGTGTAATTCTAAACTGGTTGTGACGTAAAGGTTTATAAAATAGTATTTGCATAAACTGCTG
7079	TGCAGGTGTGATTTTCCCCTCTTGCACGATGAAAAATCGCATCCAAACATGGAAAAAAAAGAGGAACTTTACAGAACCTGAGCTGGAGATGCTCCC
7089	TGCAGGATGGTGGACCTGAGGACCAGGGTTGGAGACCACCGGTCTAAAACAGTTGAATTACCCCTTCGGTTTTTGTCTTTAGTTTTTATACAACCT
7093	TGCAGGAGCTTCAGAGGCAAAAGGCTGCCTAATTTTAAACATGCGCTGGCAACTTTACACCAGCACAAACTAGAGGTCATCTGACAATCACTGGGA
7101	TGCAGGAAACTCCTCCTCATCGTCACTTCGAGCCGGGTCAAACTGGCAGGGGCACCAACCAGGGGGGGGCAACCCTTTAAATCTGCTGGCCCCCCC
7105	TGCAGGCTGGTTTCAGAACAAGTTCAGGTCCATGTAAACGAACGGGACATCTGTTGAAGGGCAAAACAGCTAAACCTCAATAAGTTTACACTGGTA
7106	TGCAGGGTTTTGAGGAGACTTCAAACGAAGCCTTGAAGGCTCTCCTCTGCTGGGTGCTGAGGATGGTGCGTGGCCGTTTGGGCCGCCGAGGATCCT
7111	TGCAGGATGGATCAATGCGGAGGTGCACACACTCGAAGAGTCACAGGATCGATATATATCAGTTCCATCTCGGTTGATTTTAGTCCAGGAGAGCCC
7121	TGCAGGCCAGAAGTAGCTCATTGGAGCTGTAGAGGGGAGCAGGATCAATGGAGTGGCTGTTGATAAGGCTGACCAGGTACTCCCGGTAATGTTTCC
7122	TGCAGGAATCTCCAAACAAACACACATCGGACATAAACACAAATGTTTCAAATAATGAGCTGTCAGGTGTCTGAGGTCCTGGCTTTTTTCTTTTGC
7125	TGCAGGGAAGGCAGCTGAAGTGTTTGTGTTGTTCAGGAAGAATAAATGGGCTGATAGATAAAAACAGAACTGAAGCAAATAAGTAATAATGTTTTC
7127	TGCAGGTAAAAATCTAATTAATTCATCGCCGTTTTGAACGAGTACACGAGTGACGAGCTGCACGGTGGAGCAGAGGGAACCTCCGGGCTCAGACCG
7134	TGCAGGGACGTGTCCTTCCTGAAGGACTGCATGGGTCCAGAGGTGGAGGCCGCCTGCGCCAACCCCGCCGCTGGATCTGTCATCCTGCTGGAGAAC
7139	TGCAGGAGGGAAGGAAAAGAGGCAAAAACTAACAAGGAGGAAGGAACACAAGTGAATAAAAATGAGAATTTATTTGGAAAGTAAGACATCAAATGG
7149	TGCAGGGAGCGTGTGTGTGTTTGGGACAGCAGGGGGGGCAGGACTGATGGGGGCTGTGTCGGGGGCTGGTGATGCAGCTGGTATGGTGGGGTACAG
7157	TGCAGGACCCAGAGAAGAACTGTGAGCTGCTCTCCTCCCTTCGACGAGGCAAGGGGCAACTTCCCAGCAGCAGCTCCGAGCAGGACGTGACGGATG
7166	TGCAGGGGGTGGTGGAGGAAAGAAAGCATCTTCAGGCCTGGGAGCAGGGTGGGACGGTGGAGGAGGGGGGATAATGACCTCCGTGTCTGGGAAGGC
7179	TGCAGGAGTCTGAGGGACTCTGAGTCCTCTGAGGGACATCCTGAGGTTTTCATGTTCTCCACGCTTCTAAGACCAAATGTTCCGATTAGACTCAGA
7186	TGCAGGTCCAAAGTCACAACACACACACACAGATTTATTAACTACACTTTTTGTTTTTTTTTAGTGCGCTGAAGAGCTAAATATTTATTCACGTTT
7188	TGCAGGTTTCTAAACCAGACACTGTCCAGTCTATGACTTTATCCTGCCTGTGAAAACCATAAACAGGACAGGAGATAAAGAAGGCAGCCCTGACAA
7189	TGCAGGATGTGAGGCGACACGCTAATGGATGGTTCAAGGCGGTTCAGATGTTTCTCTGATTTGAATGAGAGGGTGATTAACAGGCTCCTGTAGGAC
7190	TGCAGGAAGTGCCTCAGGCTGCACCGGAAGTGATACAGCTGGCTGAAGCTGCTACTTGCACTTGCAAATATTGTACAATGTAAAGGTTCTAGTTGC
7195	TGCAGGGACAGACAAAACACATGTTAATGTAGAGAAGCTCTATAAATTGTTGTGAAATATTGGATCGGCATAGAGGACTGAGAGTCGAAATGACCA
7196	TGCAGGAACGTCTGACAACGGTCCTCTGAATTCTGGGGAAGGGATCCAAGATGGATGCCTTTCACAAACAACAACAAATCATCCAGGTCCAGTTAA
7205	TGCAGGTGAGGGATTTCACAATTATCACCACACGTTCCCCTACGACTACGCCACCAGCGAGTTTGGCTGCAAGTTCAACCTCACCACCTGTTTCAT
7215	TGCAGGTCGAAGGTTTTAGGACCTGAAACCTGAACCCAAACACTGAGAAATAACAGGTGGGGAACAAGACTGAATGACGTGTGGAACTAATCAACA
7219	TGCAGGCCATCACAGTGGAGGTTTTCCACTCATTCACATGTGATAATCTGCTGCAGCCATAACCATGCAGGTCTGTGTGTGCTCCCAGTGCACTTT
7226	TGCAGGAACGATTCCAAGTCAGGAATCCTCCGTCGGCTTATCTGGAGAAGCTGAGAAGTTTTCTGGATCACGGAGGAAACAGTCGTAAGGTAAAGA
7229	TGCAGGATGGAGGCCCTCCAGGACCAGGATTGGACCCTGCTGTTTTAGATCACTTTGGAAAACAGGCAGAAGGCTTTTTTTGTAGATTAATAAAAG
7235	TGCAGGCACAGTTCCTACACCAATACAACAGTGAGCTTATTAAGGAGGGGGTGAATACTTTCACAGCCCACCCTCTCTGTGCCAGAAGCTGAGCTG
7250	TGCAGGAGCTCCTCTGACAGAAAACATCTAAACGTCCACGACTACAACGTTATTGGAAATAATAATAATTATTAAACTGCTCCTATCCTCATTTCC
7256	TGCAGGTGTTATTGATTTGCAGTGTTGTGTACTGATGTCATGACAATGTTCTGGGGGTAATTTGTTCTCACTATTCCACATTCCCAACTTGGTCGT
7258	TGCAGGTTTTAGGGTTTTTCTGCTCCGACGCACCTGATTCGAACGGTTTAATCAGAAGCACGTCCACGAGTCAGTCATTTAAAACACGCAGGAGAG
7259	TGCAGGAGAGATGCACCACCTCATCAGTTCCTGTTGGAAACGGGACTGAAACGGGTCGGTCCTACAGAGATACGACTCGAGGTTTTCTGCAGCGTC
7264	TGCAGGACCAGGGTTGGACACCCCTGTGTTAAGGCTACAAGTAGGGGCTAGGGATGACTTTTACCACAGCACATTCTAGCTCAATATCTGAAAAAT
7268	TGCAGGAGTATTTATTTTATATTCGGGATATTTTTGAGCTCTTTTAGGGCAGCAGAGATCCACTGTCCACTTGGACTAACCAACAGCTCAACAATC
7270	TGCAGGTGATGAAGATGCATACCAGTACAGGTGATTGTTGATACTGTGTAGCCATGGAAGAAGTGTGTCACAGCTTCTCTGCTTGGTCACTGCTTA
7274	TGCAGGGCTTCCCAGGTGTGTGGACCGCCGCGGGGCAGAGGAGCCATGAACCGACACCTGGAGAGGAGACAGGAGTTTACAGGATTGTCTCTTGGA
7277	TGCAGGGCCCCCCAAGAGCGCTTTAACACTTACATAAAACAAGTTGATACCATAGACATGTAATAAATTACTAGACTCCATACAATAAGCCAGAAC
7281	TGCAGGTTTTTCTCCTCGTCTCCGCCCTCGTCCTCCAAGTCGGCGAGCTGCGGGCCGCGGTCAGGGAGCGCGCTCAGTGCATCCGTCGGCGCCACC
7284	TGCAGGTGGCAGTTACTTAAAACCAATGTTTGAGAATTTAATTATGCATGAAAAGCTTAAAAATATATATATGCAGAAATCTGATCTTTGCGTGAA
7291	TGCAGGGGGGACATGAGGACACTGTGGACGTCTCGGCTTTGGAAGCCAGGACAGCCGGGGAAGGTTCTGGAGATATGTCCTCGAGCTTTGCTTGAG
7294	TGCAGGTTTTTCGTCGCCATATCAAACATGCCATCCCTGTACAACCCCCCACTTTATGCTGTCTCATTATAATAGTGTCTAATGTGTTCATGTATC
7304	TGCAGGAAGTGAAGGCAACACGACAGGTGAGCATCTCAACAAACCGGGCAAAGAACAACAGGTGACGGACAGAGACACTGACTTCAGCTGGTTGTT
7307	TGCAGGTTTTCTCCCCCCTTAATGTCGTCTGGTAAATGTGAATAAAACTGATAAAAAGCGCCACCTCTCACCCTCACATTTGAGCCCCTGTCTGGC
7311	TGCAGGCCGCGGATCCCCGACACGCGGATCCTGAAGGAACAGTTCAGCTCAGGATGAACTTTGACCCCACAAACATCACAGCAGCTTTATGAAAAA
7316	TGCAGGGCTCCCCGCCCCACACATCAAGGCCCTATTGATGAGTTGTGTTGCATATGCTGGGGGGCAGGGACAGAGACTGAAACTTTTGCAGTTTAC
7318	TGCAGGGGTGGCAGAACTGGTAGAAGAGCAGCATGAAGAGCACGGCCAGGCTGTAGCAGACCAGCAGCTGCACCACCAGCAGCGGGGCGCACACGT
7320	TGCAGGTGCTGTTCCTGCCTGTTGCCGGATGTTACAGGCCAAAACAAGTCCTGGCCGCTCCGAAATGCTGCTTTATAACCACGAAATATGATCAAG
7324	TGCAGGAACTTAGCAGACATAGACTATGATGGGAAGATGGATAGATTGGAGTTTTCAATCGCTATGAAGCTGATCAAACTTAAGCTTCAGGGGCAA
7332	TGCAGGAACTGAGTGAACTCAAGGTAGCTGAGCTGTTTCTTGCGGTCGTTTCCAAAGTGCAGACGGATGAACTCACAGTCCCAGTTGAAGGGAATG
7333	TGCAGGCAGTCATTTAAAAACACGGAGTCTTGTGTGTCTGGCTCACCTCTGCTGGATCTGCTCAGGGTGGCTCAGCACTGTAAGTGCATTGACCTA
7335	TGCAGGGAACCTTAAACGTGGCGTGATTTCTTTCTGTTTTCCATGGCTGAAGACATCTGCAGCTCGTCCAGAAACCGATCCGTGACAGCGAGACGC
7340	TGCAGGTGGTGTCGTGCGTAGCCAATCAGGAACGGCAGCAGTCTGGTCACTTCCTGTTTCAGACAGGAAGTCTCCTCAGCCAGCCACAAACACAGG
7342	TGCAGGATGGTGGCCCTCCAGGACCAGAATTGGCCTCCCCTGATGTATACAGACCCATTTATATGGACACACACACAGATCCCATGCAACATGTCA
7343	TGCAGGAAACTGCCACAAACTGCAAACTGCAAGGCTAAACTACTATTTTCTATTCATTCATTTACTCAAGGTGCACAAAAAGATGGTTTATTGTCT
7344	TGCAGGATTAGAGATAACAAATGTTAGCCAAGGAGGGGCACCTGCTGTGAGGCGAGAAGAGGAGGAGGAGACATGAAGAAGAGGGGAGGAGAGGAG
7346	TGCAGGGGTTTTGTTCATTCATTTTAGAAAATGAGGAAACAATTCCCACTACAGAAAAATTATGATTGGATATGAGGGGAAACTGTATTTGCCCTT
7349	TGCAGGTTTCAGAATTTCAATGGAGAAGGATAACAGTGGGCTTGATCGCGCTCGTTTCCCCGACACAGAGCTGAAAGTCTGCAGGGACGCGATTTT
7351	TGCAGGGCGTCAGAACAATCACTTCACTTCCTGTCGTTGTTCAGCACAAAGTCAGAAACCTTCACCTCCGTTACACGAACACAGGAAGCAGCAGAA
7364	TGCAGGACCAGGACCAGGACCAGACCCCACTCCTCCAGGCCGGTTCTCCTCCTCATAAAGCGTTCAGCTGAAGCTCATCTGAGTCTCATTAAATCC
7366	TGCAGGGTGGCACAGGATCGCTGATGGGAAGCAGCCAAGATTAAAGATGAGTCATTGTGCCTGAAAAAACCCCGTATATCCAAACTGCTGTGTTTC
7372	TGCAGGAAACAAAAATCTGACCTTCTTGTTTCCTGTTGTCTTCTTATTGAATAAAAATAATCAGCAATAGTCCGTTGTTGAAGCTTTTTATCTGTT
7375	TGCAGGATGGTGGCCCTCGAGTACCAGGATTGGAGACCCCTGCATGGTATTGATGTGCATTTTTAGCAAAAATACATTTTTTTGATAATTATTACA
7376	TGCAGGTTCTAGCATGCATCAACTATAAAAGTCTGAGAAAAAGGTGAAAAAGTCACCACTTTATTTGTCCAAATCACTTATTCTGACTTCATGGAA
7377	TGCAGGAAAAAAAAATGCTATGAAAATAAATTTCCTGCATCATGAAAGATATTTCTGAAGCTGTCAAACGCAGGTCAGCTGTAAGGGTGAAAGAGA
7379	TGCAGGTACACCACCTGGACTGTTATCTTCTTCATTACCAGCAGGAGGCAAGATTTGCTACAGCTCTGACCCGACGCTACCCCGAGGGACGCGCAT
7380	TGCAGGCACAATCAGGTTTCTGTCTACAGTAATGGAAGGAGGGAGACTGACTTGGACATCAACTGGAATGGGTTCCAGCGTCCAAAGATTATTGAA
7386	TGCAGGGGAACTAATGTAGATAACAAGATGCATAAAAACACCAGTTTACAAGCAGCAGTTATGTGTCTGGGATCTCTGACAGCCTGTAAATAAATG
7388	TGCAGGTTTGACGATGTGCAGGAATTTCGTCCTGTTTATCTGTGTGCACCGATACTTTTAGAATTTGTTATATTATATATATAATATATAATTTTT
7391	TGCAGGTACTCTGGTTTCCTCCTACAGACTAAAAACATGCATGTCAGGTTAATTAGTAACTCTAAAATTGTCCTTAGGTGTGAGAGCATGAATGGT
7398	TGCAGGTTCCAACTTTCACAACTAATGTGTGCTGTGACAATAAAAGCATGATATTAAAAATGAAGCACATGTCTGTTGTCAGGGTGATACAACTAA
7399	TGCAGGATAATGAGGCTGCACCAGTTATTGTTGCTTCTGGCGAGTTTGAAATCATTTTTTTACACTTTATAAGTCACATTTTGATTGGCATTCTGC
7405	TGCAGGTAAAAATAAATATTTAGATTTTTAAATGGTTTAGTTCATTTAGAAATAAATGCAGAATTTTAAAAAAATGTTTATTTTTTGTAGCTCCAC
7407	TGCAGGTTGAGTTACTCTGTCACTTCCTGCCGCTTAACAAATGAGTAAAAACTGCAGGCTGTCGCTTTCACTGTAGAATAACAATGACTTAGTTTT
7409	TGCAGGCTGCTGCAGACACGTCTGTTTCCCATAAACCCCAGGAAGAAGTTTCATCCTAATGTTGCTGAGCTGCAGGATTGCTGTCAGACGTGATCT
7411	TGCAGGACTGTTAAGCAGTTACAATCCTTAAAAGTGAAGAAACGTTCCTTAAATACCCTTGTATAATTTTGTTTTAGTTTTCACCATTTCTCTTGT
7414	TGCAGGCACAGACCTGCTCATCACCGTATCAAGTCTGCGTCGATTGCAGTTAATAACCCAAAGAGGAATAATGAAGTGTGGCTCGGCGCTGACACA
7418	TGCAGGGATCATGAAACCGTATACAGTATAACAAAGTATGGAAAGAAGTTTCTGTTTCCTGTTTCTCAAACTCAGAATGACCAGCATAAAAATGCT
7426	TGCAGGCTCAGCACGTCGGCCTGCCCTGAGCAAACAGCCACCCAGACCCGGCTCTGACCCGACATCATGCCCAGATTCGCATCAGCACCTCACCTC
7443	TGCAGGATGTTGATCCAGCAGAAACCTGGACGCTTCAGCCGGTCTGAGTGTGAGCAGGATCATGTTCTCCTCACCAGGAATGAACAGGTTGGTCCT
7448	TGCAGGACGGTGGCCTTCCAGGACCGCCTGCAAGGGTACCAACCCATTCATCCACCTCTGCACCTGTTGCTCTTTGTCCGAGTCAGTATCTCACCT
7449	TGCAGGCGCCCCCGATAAAATGTCAACAAGAGGCGAACTTCCAGTCCGCACCTAAAACATGGCCGACGGACTCGTCTGCTGTCACGCCGAGCCACA
7487	TGCAGGTGTCATAAACTCGTGTTTTTAATCACAACAGAACGGAGGAAACGTGTCAGATGTCTCAGAAAGGTGAGAGGTTCGAGTAAGAAAACAGCT
7492	TGCAGGTTGGTGGCCCTCCAGGACCAGGATTGGGCACCCCTGGCATAGACGACTTCCTTCAGATGACCCCCAAAGATAAAAGTCTAAGGGGGTCAG
7494	TGCAGGTGCGGAGTACAGGCCTGAGCCCATAATCCACCTTTTGAGTTTGGCTTTTACTTCACCTCAGAGCTGAAGAGGTGGGGTTTTTTTGTCGTT
7505	TGCAGGGCTGTCAGACAGTCCTTTGTGATTCTGACTAGACTGAACTATCGTTGCACTCAAAGCTCTTTTTGTTTTGTTTTTAAACTCATCAGTTTA
7506	TGCAGGAACAGAAACTCTTCTCAGTTAAAGCCTCTCTTGGAGAAATGAGGCGGAGGAAGTAAAGTTGTGTCTCTAACCTGTCAGGATGGACTAGTT
7507	TGCAGGATGGTGGCCCAAAGAGGACCAGGATCGGAGACCATTGATCTATAACATATTAATGTGAAAGGCTGAGAAACTGGAGAGGTTCCTTAAAGT
7530	TGCAGGTAGGTTGTTTCAATCAGGACTTGCTGCACTTCTTTGGATTCAGGCCTCTGACTTGTCACATCATTTCAAACCGACTGGGTGACGTGGAGA
7533	TGCAGGACCTGCTCAGGAACGAGGACGTTAAATTAGACTGGATGTTCAAGTCCTCACTTTTACTTGATCTCATCAAGGTAAACCCTAATGGTGTGC
7534	TGCAGGCGTCTGCGGAGCTGACTGATGAGGGGGGGCTCGGCCTGGTGGACACCTGTGTGGATCATGCTCTGCAGCTCCTCTGGATCCTCGCACACG
7544	TGCAGGGCATGTACACGGGGACGTTCACCGAGGCCGAGTTCCAATCAATGGGGATTATGGCTCCGTTTGTGGTGGATGAAGTTTTCGTTCAGGTGG
7546	TGCAGGTCTCATTAAGGAATCAGATCTGATTGTTTAGGTTCTGATCATGAGAACCAGGAAGCTTTGACTCTTTTCACCAGAAACAGGTTTGACTGT
7554	TGCAGGAATGTGAGGAAAATAAAATACTAAAACACTAATGCTCTGATCCTGCACTTTCTGACCCTGCTGTTATCATGTATTCACCATCGCCGAGTG
7557	TGCAGGAGACAGGGTCGGGTCAGTCCAACCGGGTCGGGCCGACATGGAACACCAACCGGGTCAGATGGACCACGGTTTCAGACTCGGATCAGTTTT
7561	TGCAGGATTTCACGGGCATTTTTTGTGATTTTTGCGGCTAAAATGCCTGATTTCGCAGGGCATTTTCCTAAAAGTTGTGATTTTTTTTAACTAAAA
7569	TGCAGGATGTTCAAGAGGTGGGCACTTCAGGACAGATGCAAATGTTTGTGAATGTAATGTAACACTCGTTTTATTTTATTTTATTTTCTATTAAAA
7577	TGCAGGTCGGAGCGGGCTGCTGCACCATGATGACCTTCTGACCCAAACTGACCCAACCAGAACCTGTCACCGAGAAACCGACCCGTCAGATTATCG
7585	TGCAGGCTCTGGTGGGAGAAGCTGAAGCCAGAGAGGTGTGACTCAAGGCTTTGCTTTCATATTTACACAGAAAATTTATGAATGTCTTTTAAAATC
7599	TGCAGGTATTTGGGATAATTTCAGGAGCTGTTATGGCGATTATTCCCCACCGCAGGATGTTTCAGACCTGCTCTTATAATAAAATTAATAATAAAA
7601	TGCAGGCTCGAGAGCTGTGGATTCTGGAGGTTTAAGAGCAGCGAGCCCTGGAGACAAGGAAACAGAGTTGTTGACACAAACCCTCTCAGGAGCGGC
7603	TGCAGGATTCATCCAACATTCCACGTGTCCCAGATCAAACTGGTACAGGAGAGTCCCCTGTGCCCACCTACCAGCCTCCTCCCACCCTCCTGGCTG
7604	TGCAGGTATGAAGGTCTTGGTCTGATATATCTCTCACGTTATAGTTTATAGGCTTTAACCTGGTCCTCTGGTATAAAAGTGAAATATATTAATGGG
7611	TGCAGGGGGTCCCTCAGGTACTGATTCTTGCAAGTGGGAGAAAGTCAGAAGATGATGTCATAGGTCCAGTAAAAAGGCTGAAAAAAGATGGAATTG
7612	TGCAGGCAGAGGGCACGCCCGGGCGGGTAACTGGGCCTCTGAGGGTCCAAAGGAAGAAGGAAAAACACACAAGATGGTGGTCAGACAGAGGAGGAG
7623	TGCAGGATTCTGCAGCAGCAGCTCCTCCTCACACATCTGAACCGCTCTGCCCTCTCCAGCAAGGCCTCTGTAAGCAGAACCAAATGGGCCAAACTT
7625	TGCAGGGTGGCAGGAAGACGACAGTCTGGCCCCGTTTTGGTTCTGGTTCTGTGGACCCTGTTTGACCATCAGCAGGACGTTAAACTCTGAGCTCCG
7627	TGCAGGGTACAAAATAAAGTGACAGGGATGTTTTTAATATGATAACACTCCAATTAATTTATTTAAGCACTAAAAGCTCAGCAATTGCCAATTAAT
7629	TGCAGGTAGTGGCCCTCCAGGACCAGGACTGGACACCACTGGTTCCAGACATCACAAGCTCAGTTGTTGCAGTTCTTTAATAAAAGCTTCAGGAGG
7632	TGCAGGTCCAAGCCTGTCCTGTCCAGTTTAACGTGACGTCTCTGTCGTCTGCTGGGTCTCGAGGGCAGCAGAGCGTTCGGCAAAGTAAGCAGAACA
7634	TGCAGGAGGGGCCCTTCAAACCAGCCGAGGAGCCATCGTCGACGCTTCAAGAGCCCACTATTTCCGGCCCTGACCCAATCCAAATCCCAGGCCTCT
7640	TGCAGGGACGCCCCACCCCTCTCCAGACCCGTACCAGCAACAGAAGGCCTCAGGGGACAGCTTTTCAACCCAGTCTGCAGCGTCTGGTCTGTCCCC
7641	TGCAGGCTGCAGGAGAGGCCACTGGGTCGCTGTCCCTCCCCTCCTCCAGCATGCCATCAACATTTTCACCCCCCACCCCACACACACTCTCACACA
7648	TGCAGGCCGAGATGTGTCGCCTCTTTGTCTTGTCAGTGTTAATGTGAGCATGGGCAGCCAGGCGTGGAGCTGTGACAGATCAGCAGAAGGATCCCC
7649	TGCAGGGAGGACATGTAACCTCCACACAGAAAGACGTTGTTTTCATCCTTCAGCCTCTGACCCTCAGACCGACAGGTCCGTCCTCTGACCCTCAGA
7656	TGCAGGAGGTGAAATGCCTCCAACACCATTCCAGTCAGTTAAAACAGAGGAACCCCCTCCGCTTGCCTAAAGCTTGAATAAAAACAAGTAATTTTG
7658	TGCAGGTTTGACTACGTTGAGGTAAAGTCAAATCCCTTTATTGAATCACCTGACAAATCAAGCATTAAAACATAAAATCACCGATGAAGTTCATAT
7659	TGCAGGGGTTGCAAGCAAACTTGCATAGAAGACCCTTCCTGATACAACCTGGATTCAAACCCGCAGCCTCAGGATTACAAGATTGCATCCCTTACC
7660	TGCAGGGGGTTTCCAATGTCCTTTAAACCGCAACAAATCAGTGACACAGCAAAACTGAAAGACTCTGATGAACTGTTTTTAACTTCAGTGTCTGGC
7664	TGCAGGACATCAGCTGAAAACAGGAAGTGCTGCAGATTGGGTCAGGTTTAAGGGATCCAGTCACTGTCATGCTGGATGGAAACGGAGGCGAACCCA
7667	TGCAGGTGGTGTTGGTGGATGGTGGCGTGATGAACAAAGAGGGAGACAGCACCCTGATGTTTGGCAAGGTGGCGACAGGACAGCCTAAGACTAATG
7674	TGCAGGTATCATTCAGGTGTGTGAACATTGGAACCCATGAAAGCAAAACCCGACTAATATCAACCCATCATATACAGGTAAGAGCAAATGAATCAC
7677	TGCAGGGAGGACAGGGTGAGACGCAGGGAGGGAGGAAAAATGTCACAGTGAGTAAAATCCCATCACCGACTGCTGCATTAACGGCGAGATTCGATC
7680	TGCAGGAAACTCCCTTACAACCAAAGCTGCTTGTTTCCTCTTTCCTCAATGGCCCCACGCGCGAGGTGGAAGCAGAGCAGGAAAAGCCACGGCCTG
7681	TGCAGGCTGCTGCATGCTGCATCACAATGTGACTCCGACTCGCTCCTCTGCCCGTGTACTTTTCAGCTGCAGCGCTCCTCGCTGTCCCTCGGTGCG
7683	TGCAGGGTTGCAGCAACTTTTAGCCCCAATGTCCATCCGGCCTCGATTACAACAGAGCCCGGCAGGCTTGCATCACACACACACACACACACACAG
7692	TGCAGGTGGATCTTATCACCGAAAAGCAAAGACAGAAAATACTGTTTGTGTACGTGTCTTTGTCTATCTGTTACTAAAATATCTCCTTAACCGCTG
7694	TGCAGGTTCTGGACGTCTCTGCACAAGCCTAGCTCCGCCTCCATGTTCTGGTTCTGGACCATGGAGGAAGAGGAGACGGCGGCCATCTTCAGCTCG
7714	TGCAGGAGTTCTTGGGGGATAACGTCTTGACGTAGAGTCGCTGAGAAACGGAATTTACTGATTTTTCTAATTTTTGTCTTTTATTTTTTTTCCATT
7716	TGCAGGTTCCTGCTGCTGCAGACGGAGGAGGACATGTCCTGCCTCCATTAGCGGCCTCAAATAACACACGTGTGTCTGCAGCTGAATTAATGAAGC
7723	TGCAGGTTCGGTCGAAGCTTCTTTCTTGGACAGATTTTTTTATTTTTGTTTGTGTGCAGGTCCACCTTCTTCAAAGCTTTTGTTCCGTTATTTGTT
7724	TGCAGGTCTGACCTGAATCCAGACGATGAGGACGACCCGTACGGTTGGACAGCAGAAAGGCAGCTCATGGTGAGGACGTTTTGGTCCCAGTCGGTC
7735	TGCAGGTCCAAGATCAAAGTGCTGAAGATCCTCCAACCTTTAGGCCAAACCGCAGCTGAATCTGAGGCCAGCCCGATTATTTGTTGCTGCACAATC
7758	TGCAGGATGTGTTTTCGGAAACTCTGAAGCTACTTCGCATTTTGATCACTACCCCCATGACAACCGCAGAGTCTGAACGATGCTTTTCCACACTCA
7780	TGCAGGTAACACACCTGTCCACCTGTCTGTTTATTTATACCAGTTCACAGGAAAAGTCATCACAAGTCACTGCAGAACCAGAACCAGAACCAGGAC
7784	TGCAGGAACCAAGAAGCTGACAAAGTACCAGGAGAGAAACCAAACCTCTGCTCAGTTCACACACAGTCGGAAACCAGCAGTAAAACAACGAGGAGA
7795	TGCAGGGGCGGAGAGATCCCTGCAGCTCGAGGCCCTCGCAGCTCATTTCGCTGCCTCGGTTAGCCTAATGGGTTGGATTTCTGTGGAAAAGTTAGA
7799	TGCAGGGGACGGAACGAACGCAGCTAAAAAAACGGGCAACGCATCGCCACGTTCCCCGACATTTTTTAACCGTGCGACAAACTTACAGCTCTATCA
7801	TGCAGGGTTTCATGTTTCTGTTGTCAGTAAACAGACTCTGTTGGATCAACAAGATGTTTTGGTTGAGGTTTTTGTTTGAACAAAGATCTTGATGTC
7802	TGCAGGACCCGGTTTGTTATTGGAACCAATGTCTGCGCACCAACAATGTGGGGCTTTAAGTCCTGCCTACTCTCCTGCACAGGTGACCTTTCTGTA
7820	TGCAGGAAGTTCCCCAGGCTGAACTGATCGTGCTACAGCCAGCTGCTGCTACTATTAGCAAATGACTACAAAAATTCATTTTAAATAACCGTGCAA
7823	TGCAGGAACGTCAGCCAGACCTCAACCATAGAAATCCATCCATCCAGTTTTCTGCTGCAGTCTCACTGGATTCTGTTTACTATCAGTGAGCCGGTC
7834	TGCAGGACCCAGAACAGTCGCATCACGCTGCAGTTCGTTAAACACAAAACATCATCCCGAAGGATCGCTGCTGTCGTACCCGGTTATCGCTGGTGG
7841	TGCAGGATGGAGACCCTGAGGACCAGGATTGGACACCCCTGACGTAGACAGACGCGTGGACATGTTCGGTCACACATTTAGAAATTGTTGTGAAGA
7845	TGCAGGATTGACCATACTGGTCTGGTGCGGTGCGCTATGGGTGCCAGCTGAAGGCAGGGGACTAGGCGCTCCAGCCCTAGTTTACAGAGAGGTGGC
7854	TGCAGGTGGGCGGAGCTTATGGAGCAGCCCGGGAACACACGGAGCAGTTCTGGTTCAAATCCACGTCTGGAGTTACCTGAGAGGGAAAAGTTCTGA
7869	TGCAGGCCGCAAGGTGAGCACTCGTCAGATCTGCAGCTTTTCTACAGTTGGTGAATTGTAAATACCTCCTGTCTGTCAGACAAATACATACTCTAC
7880	TGCAGGAAGTGACCCCGATCTGCAGAAGAAATGCTTCCGTCTTAGCTGTGTTCAGACCAGCTGTTTGCTCATCAATCCTGTCGAAGAGCTCAGAAC
7881	TGCAGGCAAGTCTGGGTAGAAAGGTTTATTTAAGAATGGGAGGGACGAACAACTTCATTAAACTACTTTTTAAAGTATAGTAAGGCATAAAAACTA
7889	TGCAGGAAGTAGAAATAAAGGTACACAGACTTCAGTTTTAATGAAGGGAACGTGACTTGTTTTACTCCTCACAGGTTGTTTAACTTTATTTTGAGT
7892	TGCAGGTGCATTGATGCTAGAGAAACGAAAGTTTCCGCTCTAAGAGTTTATAGAACAAAACCTGTAATCTAATTTAAATCATCTAAACCACCTGGT
7894	TGCAGGACACGGACAGTCTGATGGAGTGGTGGTACACAGTGGAACGTGAGTCCCAAACTCAGTCCGAAATGAAATAAACGAGAACGTTTTTCTGGA
7896	TGCAGGCACAAAAATCAGAACTTTAACTGCACTCCTAATAAAAGTTAAATAGAAGCAAAGATTTGAATTCATTCTTGAACTTTTTCTCTTTTTTAT
7906	TGCAGGAATGTGTTGTTTTCCAACTGTCTGTGTCACGCAACTGTTGTTGTCACGCCGAAACCTGAGGAGAGGATAGTCCAGCGAGTCGTCCTCTCG
7928	TGCAGGTCACCTTCTTCCTCCTGCACACACACGTCCTCACCACGGAGACAACACACCTCCAAGTCTGATCGCAGCTCTCTGATTGGCTCCTCAGAA
7938	TGCAGGAGGGGCCATACAGATCAGATGCTTAGTGTTATAGGCGGGGACCATGGCCCTCTGACCCCTTACCAAATCTTGCTCTTGGGACATGGTGGG
7948	TGCAGGACACCAGCCCCCAAACCTTGAATGAAAATAACCAATCAGAGTCGAGGAAAGTCACATGAATCAGAAAAGAAAAAAAGGAGGAATTTGTTT
7953	TGCAGGACGTCGCCTGCTTCTCGTTGTGGAAACTGAACGCTCATAAAATTTAATATCAGCAGCAGCGGCGTCTGATGTGAAAGTCTCCCTGGATGG
7956	TGCAGGGCCTGCTTTTTATTATTTAAAGCCACTTTTCTGTTCTCCAACAAGCGCTGGGTTTATTGCATCCTTCTGGGCTCTGGTTAAATTTAGGAC
7957	TGCAGGCTGGTGGTCCACCAGGACCAGGACCATGGCCAGGACCTGGACCTGGACCAGGACCTGGACCAGGACCAGACACCACTGCTTTAAACCATT
7966	TGCAGGATGGAGGCCCTGAGGACCAGGACTGGAGACCACTGATCTACAGGGTATATTTCTTTAAAACCAGGTTCCTGAGTCAGAAACTCTTGAAAC
7968	TGCAGGAATAATTACCTGGCCAAAGGAGGAAATGAAGACCAAGATGTTAAGACTCGGAAGCTACTAACCATGCATGGAGGGTTCCAGCCCAAATCC
7977	TGCAGGATACCAACCCATTGCATATGCTTTGGGCTTGCCCTCGCTTCGAAGACTTTTGGAGGTTTGTCATAGCCACTGTTTCAGACATTATAGAGA
7990	TGCAGGAGGTTTCTTTGTCTTGTTAGCACATCTCAGTCCTCTTTAGGCCTGGAGCCCAGTTTGGTTTTCAGATGTGAGCAATTTAGTGGTTTTTTT
7992	TGCAGGAGCCTGTTCATCACTCAGTCATTCAAATCAGGCACGTCAAAGCAGAGAAACAACTAAAACTTGCAGGACGGTGGCCCTCCAGGACCAGGA
7996	TGCAGGGAAACTCATGGCGTGACCCACGCCTCCTCCAAGCAAACATTTTTTGGGCAAAAATCAAAACATGGACGTCATGATGGAGGGAGGGAGAAA
7997	TGCAGGAGTTTGTTGACCATTTTTGTGACAGTTGCAACCCAAAATGTCTGATCACGAGGTAGCTTTTTTCAGAAAATTGCAGTCAAAGTCACAACA
8002	TGCAGGTTTTAGATGTTTCTCTGCTTTGACACACCTGATTTGAATGACTGAGTGATTAATGGGCTTCTGCAGAACTTGAATACTTGCTGGAGAGCA
8012	TGCAGGAACATCCATCTTCTTCACCAGCCTCTCCTTTCCGGGTCACATCAGTCACTGTCCCAGAAGCGGGGGACACCCTGGACAGGTCGCAGGTCC
8015	TGCAGGCGAAGGAGACGGAGGAGGACCAGTCAGCTTGGGACCAGAGGGTCAGAGGACGCGGCAGAGATGGAGGAGTGTTTACCTCCACAGAGTAGG
8024	TGCAGGAAAACAAAAACAAAAACAGTGACGTCAAATAAGGTTTCTGCACGCTGAGTCAGCATTCACACTGAGTTCTGCAATCAAACCGAATCTGCA
8031	TGCAGGATGGCGGCCCTGAGGACCAGGATTGGACACCACTGCTGTAGACCTTAATGTTTCCATGTGAACCAAACAGTCCAAAACAGGCAGCTAGTA
8033	TGCAGGATGTCTGAGAACGTGTTTAATGAAACTGGAAGACTTCCTCAGTAACTCTGATCTGAAACAATCTTTGATCTGAACGTCCTTCAGGGAAGC
8035	TGCAGGTTTCCCTTCTCTTCAGCTGGTCTTCAAGTTCTGCAGAAGCCAGCCTGTTAATCACTCAGTCATTCAAATCAGGTGTGTCAAAGCAGAGAA
8038	TGCAGGATGGAGGCCCTGAGGACCAGGATTGGACACCCCTGCATTAGGTGAACCTGTTCCCAAACAGACCTGAGAGGTTCTGGATCAGTTCAGCTC
8041	TGCAGGCTTCTTGTCCTCCATGAGCTTTATAAGAAGCTGCAAACAGAAGAGCTCTGAGGTTTCCAGTCTCCGACATATTGTGCAATGCGTCGGTTG
8045	TGCAGGAGGTCCGGAGAGTCCTCAGAGCCGTGAGTCTCACCGTGCTGCCTTCACGGACAGTGGGATTTTTTTTAAATATAGACAATCAAATCTCTC
8055	TGCAGGAAGGACATTACAATAGTTCAGTCTGCAGGTGAAGTTATGACTCAGTTTTTCAGCTTCAGCTGTAAGTCTGCTTCTAATTTTACAAAGAAA
8057	TGCAGGAGGGTTGTAGCAGCATCCAGCTTTGTAATTGTTTTCTCCAGCAGACGCTGCGGCTGATCACTCGACTGTTTCAGGAACCATCACACATCC
8060	TGCAGGGCGCGTTCCCGATGATCAACATCAGCGGCGTGCACGCGCCCAAGCAGCCGCGCGCGGGCAGGAGAGCTCCCGCCAAGAGCGGGCTGAAGG
8064	TGCAGGAGGCGGAGTTTCAGGAGGCAGAGCTGCAGGAGGTGGAGCTATAGGAGGCGGAGTTTCAGGAGGCAGAGCTGCAGGAGGTGGAGCTATAGG
8068	TGCAGGAGAATTTAAACGAACGTTGTTCTGATATTAGATGATGAAGTAAGTTGCAGAAGCTGAGAACAGCCATGCTCACACTTATTATCATTGTCT
8072	TGCAGGAGCAGAAAAAAGATAGCAAAATACAAAGCAGCTGCATCCCTGGTTAAAAGAGGCGAAGGTGAGGAGCTGCTGGTCGTTCCACCCCTCCAA
8082	TGCAGGATGGTGGCTCTCGAGGACCAGGGTTGGACACCCCTGTTATTGAGAGTAAGACTTGCCACTGAATGCAGAAATGGACTGTCTTCAAACAGG
8094	TGCAGGCTCAGAAAGGGCTCCTGATCTGAGTCAGACTCGTCGGCTCCAGAGGAGTCAGCTCTGCTTTGACCTCAGGACCCCTCGGGGTACAGCTCC
8096	TGCAGGCCAAATACCATTTGCAGTTGACTGTAGGATAAAAATGGGAAACAGGAAAAAAGAGCCATGGTATTTAGGATAATTTGCATGTATTTCAAA
8107	TGCAGGACAGGCAGGACAGGGACGCTGTGCGCTTCTGCGTTTCCATGAAGGACAAAAAAAAAAAGACAAAAAAAACCCACCCTGGGAATCTCATGT
8112	TGCAGGATGGTGGCCCTGAGGACCAGGGTTGCCTTCCCCATTTCTAGCAGATTTACATTTTTCTTTCATTTTAGGCTGTAATCATGCTTTCTTGTG
8114	TGCAGGAGGAGACAGCCAGAGACGGACAGGGACATGAAGAGACAGGTGGAGACAGACGGAGACAGACAGGGACAGGAAGAGACAGGTGGAGACAGA
8115	TGCAGGGATGGCTGAACTTTATTTTAGGTTGATCCGAGTCGCTTTAATTGATGGCAGGTGTGTTCCCAGAAACACTGAAGGATGTAATTAAACCAA
8135	TGCAGGGGGTGCTTGGCAAGGAAGTTGATCTTGTCCTTGTATTGAGTTGGGGGTTCGGCATTGTTGCATGGTTCAGTGGTGTCTGCTTGGTTGCAG
8136	TGCAGGCCAGATCCAGCCCTTGCTACAATTTTACTTGGTCCGCGAAAAAATTATTTTAAATGTTTTAGAACTTGGATTCTCTTATCAGTTTTTATT
8145	TGCAGGTTACAGTCCTGTGCTCTGCCTATTGACACCCACCTCCCCCCTTGTTTTCACAGCAAAGCTGAGTGCCTGGATGTTACATGTGGCCTCAAC
8146	TGCAGGAGAACCGTCAGAGGACTCATAAAGTCCACATCACGATCAAGGTAGGACCTGAGCGGCCCGAGTCCTGCGCAGAGCTGAGAGGTGGAAATA
8149	TGCAGGCTCGCTCTGTTGCCGAGCAGTTCTGTGAAAGCTACATACCTGAGTGGCCTGACTTGAAGCAGCTGGTAGAAAAGGCCTCCACTCCAAAAT
8153	TGCAGGACCAACTAAACCTTATAAACAGGGTGTCCAAAATTCCTATTTTGTTAGTCTTTCAGATACTCTGTGTGCTATGGTGCACCAGCTGTGGCA
8165	TGCAGGCGACCCTCAGACTGTGCTGCAGGAAGACAGAGACCCCATGCTGACCCTTGACCCCGACTACCTGGACTGCCGCTCAGACACAGATGGAGC
8167	TGCAGGAGACCTGAGAGAAATGCAAAATGTGCTGGAACGCACATAAAACGGGATCAGTTATGCAACGCTGACTAATCCGTTTCCATAAAACCTTCA
8169	TGCAGGGAGAGCGGCTCAGCTCCGTGCGACACCGACCTCCTGAATCTGCGACACTTCGTCCGTCAGCATCCTGGCACTCTGCGTCGTCTCCGGCCG
8175	TGCAGGGAAAACCGGACCCCACCCAAGAGGGCAGCAGAGGCAAGTCCCAGGCGACCCCCAGCAGCCACGATGCACAAGCCCCAGGGGGCTGCCTGG
8177	TGCAGGTGTTGACAAATGTTTATGATGAGCACCATGACGCTTTAAAAGCTTTCACTCATCTTTACAGAAGACACATTTTGCTGCGCAGAATTGTCT
8179	TGCAGGGTATTATTTGTAGATTTCCAGAGGCAGGAAAAGAAAGCTTTGTAGAGCTGGTTAAGTAAAGTTTAAACATGAAAACACAAAGTTTCAATG
8194	TGCAGGTTTCACACACACTAAATGTTACCACAGGTTAAACTCAGTGCTGCACAGACAGAGGATCCATCCCTGCATTAAAACCAGGTTCTGGTTCTG
8195	TGCAGGTGGTGGGTTCATGGGAAATAAGGTCCTGTTGTGTTTTTGGGATAGGCACAGTCAAGCCTAGGAACCAAGGGCTGTCCACCAGGCACTTGC
8199	TGCAGGAGCTTCTCTGGCTCATTATTTTTACGACACTACACCTTTAAAAGCCATCCGCAGTCTCGCCCCTCCATGTTTATATGACCTTGTGCATAT
8204	TGCAGGAATCATGACACACAGACAGACACACAGTGTTATTTTATTACTCATTTCTTAGGAAAAGTCTTTTTAGGTTCTTTAAATTTAAATAATACT
8205	TGCAGGTCAGCCTCTCCTTCAGACAACCCTGCATGGCCATCTTTTTACCTGCATGCTCGCAAACTGTGCCGGGTCACTAAAGAAATAATTTCAGGG
8206	TGCAGGATGGAGGCCCTGAGGACCAGGACTGGAGACCCCTGCTTTAGACGGAGGTCAGGTGTCTTCCTACCTTCTCCCTCCAGGAGGCAGCGCTCG
8209	TGCAGGGCTCTCTGCCCAACACATCAAGATCCTACTGATGAGTTGTGTTGCGTATGCTGGCGGGAAGGGGATGGGTTTGTAAAAAATTTAGTTTTA
8222	TGCAGGAGAGTTAATCTGCAAAACTCCTAATATAAACCATTTCTATGCAGCACAACCAATGCTAAGTCCATGTGTGAAAACCAATCATGTGAATTT
8226	TGCAGGATATTGGATAGATAGAAGGTTCAAGGCAGTTGTGAACACCTACAAATTGTTCTCGTATTTTTGAAACATGAGGCTGAATCCAGAGTCCAT
8230	TGCAGGTTGATGGGGGCGTTCTGCGAGTCGGGTTTGGCGATAGCTGTGGTTACCATGGCGACGGCGGCCGGGCGCTGCGACAGGATGGCGCCGGGC
8231	TGCAGGTAGTGGACTTCAGAGCAGGAAATAGTTGAAACCTTTCGCTCTTTACATGCAAACTGACAAGACAGCATTCCTCTAGCTGGTGTTTAACAC
8238	TGCAGGCCACACTTTGGACACCCCTGCTTTAAACCATAAACTCACCCCACTGAGGTAGAAATGAACTACAATTAAAAATGTTTAAACTCGAGTTTT
8239	TGCAGGATGGTGGCCCTGAGGACCAGGATTGGACACCCCTGCTTCAGATGACACGGTTATTGTTAACAACGTTTACACAGAACCCTGCTTCAAAAT
8241	TGCAGGCCCATCAGGCCAAAGAGGCTGTCCAGAAAACTGTGACCAGTGTCCCAAGTGTCTGAACCCAAGGTACGACTTCAGACGGGGGCTTTTGTT
8247	TGCAGGCTCCAGCTGTTAGATGGCCTACATTGGATGTGGCCACGGTTCCCTGACTGTGTCCGTTACAAGAGTGATTGCAGCCCATAAGAGACGTTC
8249	TGCAGGAGACGAGGAGGTCACCTGGGATAGCTGCGGAGCGAATGTCATATATTTCTGTTTCCTAGTATGAATCATCACGAAATCATGCAGCGTTTT
8250	TGCAGGAGATCATACGGCTGGAATAAAAGCTGAGACGGTCCAATCATTGCAGCTGTTTTGTGACTTGTAGCGTTTTTACTTGAAGAACCTACTCCC
8252	TGCAGGAATATCAGCTGATCAACCTGGTTCCAAACAATCAGCAGCATCTTTTAGAGCTTTTTTCTTACTCTCTTTGAAATTATTGCATAAAACATT
8256	TGCAGGAACATGCTGGTGTAGATTCTCAGTCATCCAGGCCATGGTAAATTCAAAAAATGTTAAAAAACAAAAACAACTGGACTTCTATTCTGTAGC
8257	TGCAGGTCCAGGGAAGCCAGGAAGACCCTAAAATCAAAAGGAGGGGAAATCAGAAACACTACTCATGTTTGCAACAACGACAAAGAAAGAAAAAAA
8298	TGCAGGTTTTAGTTGTTTGGTCTTCAAGTTTGGTAAAAACCTGTTAATCACTCAGTCATTCCAACCAGGTGTCAAAGCAGAGAAACACCTAAAACA
8300	TGCAGGAGGCCAACACCTGCTCACCTGTGAGGGGAGGAGACCGACTTCTCCCAGGTGTTCATGCTGACTCACAACAATCAGCTCAGGAATATTTAC
8301	TGCAGGATGGAGGCCCTGAGGACCAGGGTTGGACACCCCTGCTCTATAGAGGATTTTTGAAATTTTACCTGAAACATTTTATTAGTTATTTTAAGC
8302	TGCAGGAGAGGCCAACGATCAAATAAATACTGACACGGAAATTCTTCTCAAAATGTAAACCAGTTAATAATTTTTGTTAACAGGGGAACCGCTAAA
8308	TGCAGGCCTCCGTCCTCCCGCTGAGGGGGCTGCAGAGCTCCGCCGCGGAACCACAAGGTCCAGCCGATCCACAAGAGACAGATCCGCATGGTGACA
8310	TGCAGGAATAATCCCAAAGTGTCGTGGCTTGTCTGTTTCCTGAGGAGAAAAAATGTTCATTAGGCTGTTTATTGGACAGATGTTTCTAAAAGCTAT
8331	TGCAGGACACGAAAAAAACCCAAAAACAAACACGAATAAAAAACTGCAACGACTGAATAAAACCGTCGCTAATAAAAATATCATTTTAGTCACACG
8341	TGCAGGGTGGAGTCTCTTATGATACGGGCTGCTCTGACCTTGCATCTTTTACTGTAAAGATCAGAGATGTGTGGTAAGCTGCATCCAATGGTCCTT
8348	TGCAGGTGCACTGTCGCCATGACCCCGAGCGTTCGCAGTCTTAAATACTCAGCACAAATACCCACTCAGGAAACAGCGAAATCTTAATTACATGCA
8350	TGCAGGCATGTGAGGCACTAATTAGGGCAAAAATAAAACTGTTTTAAGCCAATATGCAGGCTAAAAGGCAAAGGTAGCAAAACACTAGCTACAAGT
8359	TGCAGGCCATGGGCTACATGCCACCTACGTACAAAGAAGTAGTGCATCAACTTAGATTTTTTTAAATCTGCGTTGTATCCTTACAAACCAGCCATC
8366	TGCAGGAGCAGATCCCATCCGAGCTCCGACTGAGACAGACAAGCAGGAGACATTTAATATAAGGGAGCACAAAGGCAGATGGGGTGTGTGATCCTT
8375	TGCAGGCACACTTTGGAGTCGAAGCTTTAAAATACGTGGTGATCCTCTCCGTGGAAGATGGGAAGGTTATCGAGGCACTGGACGACACCCTGGTGG
8378	TGCAGGTCCGTTGACATTGCGTCTTTGCAAACTAAAGCTACTGTATCAAAGTCTGTATGAAAGTAAACCTAAAAGAAAGTCACTTTAGCTCTTGTT
8383	TGCAGGTCTTTGGTGGCAGTGGGAGGTATTAGATATGCGCACCATTAAAGTGAGTTCAGACGGGACCAGTGAGGAAAAATGAAAAACACTCTGAAC
8397	TGCAGGCCGGAAGCGGGAGTGGTTCACAGTGGACGAAGCCATCAAAGTGCTGCAGAGCCACAAACCCGTCCACGCAGAGTACCTGCGGCGGCTCCA
8399	TGCAGGCTGAGGCCGTTCACCGGACTGAACCTGCACAGATTTATGCCCCTCCGTGGCAGTGGCTGTCCTCGCTGCCCGCCAGGAGGATAAATAAAC
8400	TGCAGGACGCAAACAGCTGACCTCACATCCACCTTCAGACTGTCAGACATTTTAACTGATCTTTCCATTCAGGATTTCAGCTCTTGGATAAAACAG
8412	TGCAGGAAGGAAAGCATCAAATCACATTTAACTGAACAGTTGGACCATTTCCTCGTGGGCTGGCTGCTCACAGATGGTGGGAGTTGTGTGTGATGT
8416	TGCAGGAAAGTTCCTGTTCAGGTGACAGTAAATCTCTTTGGTTCAGACTAGTTAACGGCTAATCCAAGTGTAGTAAACATCACTGCCAGGGTGGAT
8420	TGCAGGATGGTGGCCCTCGAGGACCAGGATTGGCCACCCCTGTTGTAGTCAGTCTAAACTCTTCAGGTTTTCTCTTTCATTCTTTGTATTTATCAT
8431	TGCAGGATGGTGGCCCTCGAGGACCAGGATTGAACACCCCTGATTTAGACTGACCTAAACTCTCCAAATTGTAGATAAATTGGAAAACTGTAGATA
8436	TGCAGGCATGTTAAGACTTACTCTTATTTTTATTGTATCCAATATGGGGTCAATTGTAGATTTTTAATGTAACATGACCAAATTAGGTTGATTGCT
8439	TGCAGGTAAAACTGTTTGTTATAGTTTATGTTTTTTCTTTTTTTTTTATTCCTCTCAGTTCTGTATTTAGTGGTTCTGCATTGCATTTTGACAGAA
8441	TGCAGGTCCAGGACGACGGCGCGGGAACAGGTGAGCGCCTCTTCGCAGCAGGGCACACTTTCCACTCGGACGGAAAACGTCCCGCGTCCGCTTCCA
8452	TGCAGGAGGCGCCCGTTTGATTAACGAAGAGGTGTGTGGCGGTACATTTATCCAAATTGGTTTTTTTTGCTTTTAGCTACAATTTTGCTACTTTTA
8454	TGCAGGATTGTCGAAATATTTCTGCTAGTCTGACCATTCAATTATGTAAAAGTTTATAAAATAATGTTCACACTAGCTGCTATCAAATGTTTGAGA
8459	TGCAGGGATATGAGGTAGACCTGGAGTGTCTTTCAGACGCTCATGTCCCCCTGGACCAGGCTAATCACTGCTGTCAAACACTGTTTCCTGTTTGCT
8462	TGCAGGCACTGCTGGCCGAGAGGGACCTGACTTCAGGTGGTACGGATTTAGATTTATCATTGATGAGAACATAGACTGAAAAATAGCAGGACGTTT
8464	TGCAGGAGCATCATCGCCATGGTTACCATCAGATAAATCAGGTGATGCAGTGATGACCTCACACTCACCTAAAGTTGGCCACACTGCCGTCTGTCC
8467	TGCAGGTCCACCTAGGCCCCCCGTCAGTACCCGGGTCAGTGAAAAGTCTGCTGTGGTCTCCAAATCCTCCATCGTGTTCCAGTTTAACTGCAGCTG
8476	TGCAGGTTGGAAACTCCCGGATCAGAAACTGAAACACAGACGAAGGAAAACTGATTCCGAGTGGATGAAACAATAAATAAATGTTTGACAGGTTCC
8479	TGCAGGATGGTGGCCCTCCAGGACCAGGGTCGCCCACCCCTGATATACATGTTGATTGTAGATAAATAAATACATTATAAACATTATTATAAAAGA
8481	TGCAGGCCACGGGAGTGTTAAGTAAGGGGTTTGGATAATCACAGGTGGACATGTCTAAATGTCTGTGTCCACACCTGGTATCAAAATGTATGCCAT
8485	TGCAGGTTTTGCTTGTCTCCCAGCCATGACTTGTGGTATACAAATAGGAGTGAGTGACCTTTCAGTCCATGGCTCCGTGTGTGTGTGTGTGTTGTG
8499	TGCAGGATGGAGATCCTCGAGGACCAGGGCTGGGTCCAGGTGAGGAGAAGGCAGAGGAAGTCAGGTTTTCGGTGGGGTTCAGATCCAGACCCTGTC
8506	TGCAGGTTTGGAGGTCGTATCTGTGCTTCTCTTTTCCTCCCGTCTCTGTGGGGATGTTCTCGGCCCGACAGGACCAGGTTCTGATGACAAACAGTT
8510	TGCAGGGACTATCGTAAGGGACAGGTAGCGCTGTGCAGGGACTGCCTATGACCAAAGGTGGGGCGTGTAGAAGGAGGCTCGTTTACGGCGCTTGTA
8511	TGCAGGTTTTACAGAAAAGCAGCTCCTAGATTAATATATAACATAATATAATTATGAGGAGCCACAAGATGTCAGCAGACTCAAACATCTCATCTG
8519	TGCAGGAAGTTCTACAACACGTCCTGGTCGGACTTTTACACAAAACCTGGTTTTTATTTTAAAACGGGACAAATCAGAACCTGGAAGAGGATTTAA
8525	TGCAGGGGGCGACAGCGAGGCGCGTTCAGAGCTGTGGACATGTGCACGTGATCAGAGGCCAATCAGTGGGCAGGTGGTGGACAGCTCACCTTGCAG
8553	TGCAGGATTCTCAGTAACACTCTCAGTATTGGATGAGAGAAAGCTTTTGCTCCATCATACATTTTATTTACATGAAATGACAAATAAACTGTTCTC
8556	TGCAGGATCAGCAGGTTTGTGCGCTAAACATACACACACCAGTTGAAGTTCTGGTTGGAAGTTTTAACTTTATCCTGGCAGATCAGATTATAAACG
8587	TGCAGGCGCCTCCTGTGCTCCTGGATCTCCAGCTGGCTCGCCTTCAGCGCCTCTCTCTTGGCCTCGGTCGCCTCCGTTAGTCGCGCGAACTGGGAT
8596	TGCAGGACCGGCGTCCCTGCTGGCTGTCCAACGTACACTGTCTCCATGTACTCTTTCTGAGGGAAGTACAGCCCTGCCACCCCTGCAGAGACAACG
8609	TGCAGGGTTATTTGTTTGCATTCACGCTAACAGTGTAATGTGCTTTACTTCCTCTGCATCGACTCCAACACTTTGGGAACATGCAGGGGAAGGACT
8616	TGCAGGTCAGGGTGGGAGGCGATCTTCACATGTCGATTTGTCTGTTTAATGTATCTGCAACCTGCTCTTTGTAGCTTTAACCAAAAATAACATGGA
8629	TGCAGGAGGCATGAATATGGAAGAACTCTGCTACACGGAACCGTGGCATCAACACATTTGATTTTTTGATTTTTTTTTGGAGAAGAAACAGCAGAT
8639	TGCAGGTGTGCAGCGTTGGACGTTGAACCCATCTACACCTTCAGAGCTCACAGGTGAGAAGAACGACAGTTTATAGAACCTCCACCTATTCCTAAA
8657	TGCAGGCAACGAGGTGTTTAACTCGAAACGACGCGGTCAGCAGCTAACAGGAGGCGGTTCTTCAATAAACAAGCTCTTACGTGATGACAAAGGAAA
8658	TGCAGGTGAAAACACACACATACACAAACATGAGAGCCTTGATCCTACAGACCATCATTGTCATCATAGTCATCATCAGTGGTGTTTCTAAAAATT
8662	TGCAGGGTTAAGTTTTCTACCCTAAAATTAGGTTTAAATTACTAAATTGTTAAATCAGAGCCACTAAAAAGTCGAGTTAAAAAGAACAGCCTCAAA
8676	TGCAGGGTGTCGACCCGGTACGGGCAGCAGGTGGAGCTGAAGGAGCAGAATCAGCACTTGATGGGCGTTAACGAGGAGCTGCAGAAAAACCTCTCT
8691	TGCAGGGGCTTTGCTTTTCTCTTCCGAGGACAGGGACTGAAGTTTTCTTCATCGCTCTGCCCACCCTCACATGTCACTAAGGGTTGGGATTCAACA
8693	TGCAGGATTTAAGACTCACCTGTTAAACCCAGAACCCATTGGACTAAAACCGCTGATTTCTGCCCCAGATGGTTGGATGTAGGCGCTGCCCACCTG
8707	TGCAGGATAGGAGCCCTCTAGGACCAGGATTGGAAACCATTGACATAAAGCAAACGAAAACAAACAACAAACAGAGTTACTTCCTGTTTGTGGACC
8719	TGCAGGCGCACCAGATTCACACCAGATATGGACGTTTGTGCAAACCAGTTGAGAGATTAACTTTGTAGTTAAATATTGATTTAAAAGGGGGGGGGT
8723	TGCAGGCTATTCTGTCGGGCAGACCGAACGTCAATCTGGAGGCCCGTAATTTTGAAGGTAATGTAATATTTTGTCTTTAAAATGAAAATAATGAAT
8724	TGCAGGACAAAGAGACGAGTCCACAGGAGGAATGAGAGGAGGGGGAAATCTTCTGCAAACAAAAGCAGATATAAGAATTTATTTTGAAACTCTGGT
8739	TGCAGGCACTCTTTAACTCTCATATTACTAGAATAGATTCTCTGCTGATCAATAGTGAAAGGACTCTTGCAGCAGAAATAAATGTTAGAAAAAGAA
8744	TGCAGGACACTCTATGTACAACAGATAATTCATCAAAAAAATCTTTGTTTTGCCATCATGCTGCATAAAAATATTAACGTCTAGCCTTTATCTAGT
8764	TGCAGGAGGAGGGGGAGGACGACCTCACCCAGTACCTCACCCACATGCAGAGCTTGGACCAGGACAGCTGACAGTGAGGCTGTAGGTGGGGGGGAA
8765	TGCAGGAAGAAGAGTCAAGGTCAGGTGCCTTGCAAGCCAGGTGGCAGGTGAGGCCAGGGCCCTGAGGGTGCTGTTGACACAAACTAGCTCCCCACC
8766	TGCAGGCTCTGAAGCGTGAAGACGATGTCGCGGACACCAGATGACCTCTGCTGCCCGATCTGCCGGGATATCTACAGCGACCCTGTCATCCTGTCC
8768	TGCAGGAGGCAGTTATAAAAATTAAAAAATGAAGAAAAAAAAAAGAGGAGGTTGGGGAAAAAAAAGCATAAACACCACCTGTTTATCTGACGTCAG
8772	TGCAGGATGGAGACCCTGAGGACCAGGACTGGACAGTTTTGTATCAGGTGTTCAGCAGTGACAATATTGGGTCAAATCGCCCAGCCCGACTAGTGA
8773	TGCAGGTTCTCCCTCAGACCTCAGGAGAAAATCCTTCCGAACATCTCGTGAGCACACCTACCTTCAGATAAGATCCGAACTAGAATCGGAGCTGGT
8776	TGCAGGTCTTTAACTGTGTTTAATCCTTTCATCATCAACAATAAATCCTGTGATTTTGATAGATAGATATGTGTGGGAAGCCCACCAATTGAAAAA
8784	TGCAGGGTCACAAAGTCCTGAAAGTGAGCAGAAGCTCAGATCTTCCTGCAGACTTGAGCTCTTTTAACTATTTCTGTGTCAGATTTGGCTCATTTC
8797	TGCAGGGGGAGGTCCGGATCCCGCGGGAACTCTCCGGTCCGTGAGCCCTCCAGCTGCTCGGGTTCAGACGCCGCTGCAGTTTGGAAATGAATCATT
8804	TGCAGGTAGATCACGCAGGACAATGCCCAGTATTCAGCGAGGGGACAAAAACAGGACGCGTGCTTGGAGACAGTACGGAAACAAAGCGAGACGTAG
8807	TGCAGGAAACCCTTTGGCTTTGAGTTAAAGACGACTCTCAGCTACCGCCACACCAAACTTCAGCTCCAAATCTGTAAAAATGACCGAGTTTGTCTT
8815	TGCAGGGATTAAAAGCCCCGTCTGATGACGCGACATCATCTAGAAGCGAGAAAATATTTTTGGTGGACGTTTGGTACAGTTGAACTTTTAACAGGG
8822	TGCAGGATCAGATAGATCAGCTTAAAAACATAATATAACATCTTCATAATGTCAAGAGTTTTAACCAAAACTGCAGGAAGAACAATAATCGGATAC
8824	TGCAGGGGAGTCACAAGTCTGCCAGAAAGGAAACAACAAAATCATTTTAAATTACGTTTTCTGGTTGCAGCTCCCTCGTTAGACGCGAGCAGATCT
8826	TGCAGGAGTGGAGGGTAGTTGTTACAGCCAGTTATACACATCCCAACTTTTGTACCGTATTTTCTGGACTATAAGATGCACTTAAAAGCCTTCAAT
8839	TGCAGGTTTCTCTACAGACGATTATTATCTAAATATTCATATTTAGTCAGAAAATCCTTAAAATAAAGGAATAATGGAGCTTAAACATGGTTTTCT
8840	TGCAGGGCTGCAGAGGTCCTGCTGCTCGTCAGACTCGGCGGACGCCTGCTCCTCCCGTACAGACCTTGTCATGTTGCCGCTTCACTGATGAGGCAC
8852	TGCAGGCGCAAGGCTTGAGGATCCCCACATATTTGGACGACTGGCTCATTTGTACAGCAACACGAGACCAAGCACTCCAAGACACTCAGTTGGTGC
8860	TGCAGGAAGTGCTCCAGGATGCACTGGAAGTGCTGCAGCTAGCTGCTGCCGCTCTGTGCTTACAGATATTCACAGAATTCCATGTAAATCTGCATG
8866	TGCAGGTTGAGTAAAAGTGGATCATCAGAACAACATGAGGAAATGATCAGTACCATCCTGAGCCAGGCAGCCGGGCAGAACCAACAGCAGCAGAAC
8872	TGCAGGGCATATCAAATATGTCAAATCTTATTCTACACTTAATTCTTTTGCAGCCTTGGATTGTTTTTTATTCTGATAAACTTGCTGCAGATCTTT
8875	TGCAGGTGGTAGCCCATGTGGCAGTGAAAGCGGGCGACGCCTCCAGGGAGCAGGTCTAGCAAGGACACCTCCCCAAAATGAGGCCTCTTCGGCAGG
8877	TGCAGGAAAGCAAACAGGCTGCAGAGATAATCCAAGATATCCGCCATAGGTGCTTTCAAACCAAATAGTTCTAAGGACTCTCCGAGGACTCTTAGT
8879	TGCAGGAGGGCGGAGACTTTACAGTTCTGACAGAAAAGAAGGCAGAGTTTCCTGAAAGGAACTCTGACCCCTTTCAGTTCTGGGGTTTAAGGAAAC
8884	TGCAGGGTTACAGTAGCTTCCTGCAGCAGAAACATTCGTTGTTTTCATGTTTTTCATCTTTTCTCGTCTGAACCTTGAAGAATCTCAGTAACAGCT
8890	TGCAGGTCCTGAATATCAACAGCAACTGCCTAAGAACAGTCCCAGAGAACGCCTTCGACAGCCTGCCTCGTCTCAGATCCGTGGATCTGACCAACA
8891	TGCAGGGTTTTCTAATTCTTTCTGCACATTTTTCTTTTTTTATTATTATTATTAATCTTTGTGTTGTTACTGCCTTTTATTGTTCAAATAAATAAG
8894	TGCAGGATGGTGGCCCTGAGGACCAGGATTGGAGACACCTGACGGTTCGGCCGTTCGTTGCCACTTTATGATGCATCTCTTCCACCTGAGGACATC
8895	TGCAGGAGTCTTTGAAAATAAAGCTCTTCTCTTCAGTAGTTTAGAACGTCTGCTGTTTTCAAGATGTTTCTCAGGGTTGGTTCAAGAGTCGATCTT
8896	TGCAGGAGATCTCGAACCCGGACGGGCTGAACCACACTGCCGGCTTCGACGGATACATCGACCTCGGCAGGGAGCTGAGCAGCCTGCACACCCTGC
8899	TGCAGGAGCTCGGGCCGAACGATTTCCGCCATGTTTTGTCACCTCCACTCCAACGACCCTCTCACCTGGCTCTTAGCGCGCGGCCGAAAAGAGCTC
8901	TGCAGGAGTTCATCATGTCAGCATCCAATTAGATCTGGAGTCCGTTTTTCAGTTTAGTCACCTGGTCCTCACATTCAAGGTAAAACGGATAACTTA
8905	TGCAGGTGTTTGATGAAAAAGGAATGCATTAAAAAAAAGAAAATAAATCTGCTATTTATTCCAAAATTGTTTGTGTCCCCCTCGGTTAATTTGCTG
8911	TGCAGGCCGGCGGCGGCAGAGCAGTCGCACACGAACAGAAAAGGAGGAAAGGTGGATGAGAGGCAGCAACAGGGTGTGAGAGGTAGCAGGCAGCAA
8914	TGCAGGACTCCAGACAGAAACTTTGAAATGAGATGAAGAACTTTCCTTATTGCAGAGGAGATTTGTTTTTCAGATGTTGGCCAGAGAGCGGACACA
8929	TGCAGGGGGCGGGGCTTATCCTCCTCACGCTTTCCTTCAGCTCCTAAAGCAGGGGCGTCAAACCCAGTGACGCAAGGGGGCCAAAATTAAATATTT
8933	TGCAGGAGAGCTCTAAGGATCTCACCGGTGATAAATAATTATAGACTTCAAATCTGCTCGTCTTCATTTCGAAAGTGTACTCCAGCAGATTGAATC
8947	TGCAGGGGAAGGAAAACCGAAGGAAGGTGGAAAGAAGAGATGGAGCCATCTGATTAAACAGGAACTCCTTCAGGGTTCTGCGTCGTTTTGTTTAGA
8948	TGCAGGATGCTGTGTCTCAGAGGATCGAACTGACCCTCGGAGAGGAGACTTGGGACAGTCACTGCATGCTCAGTCCAATGCCTTCAGCCAAATGGA
8958	TGCAGGTGGTCGTATTGTTTGTTTGGTCACAGCGACTAACAATCCTTTATTCCTGCTGTACAGACTCTGAAGAAGAGATGGATACCACTCCAGCAG
8970	TGCAGGTCCTTCTTAGCAGCCTGGAGGATTGTGCTACTTTTACTGAGGTGAATAGCGTCAGACTGCCCTCCACTGTCAGTATAGTGCAACACTTCA
8973	TGCAGGCCCAGGTACTGAAATGCTACACGGAGAGCGCAGGAAGAACTCTGTTCTGCTCGGCGATCGCATCGGCCTACATGCAGTGTGTGGACGATG
8996	TGCAGGCCAGAAAACAAACGACTGTGATCATTAATAGGACTGCAGGCAGAAATAAACAGTTCAGTCGATTATAGAATTAAAAGCGTCTCGTCCACA
9018	TGCAGGGTTTGGCGTGTCAGATTTGCATGGTGCTGTTTTGGTTATAGATGTTTGTGTACTCTGTGTCCATCTCTGTAAAACTGTTCATGCTAATGA
9033	TGCAGGCACTCATCACAGAATCTCTTCAGGTTATTGTGTGTTTGTCAGGTTCTTGGGGTGTTTATGTGGTTCGCTGTGGTTCCTCCTCATACCATC
9046	TGCAGGCAGCCTCCACCTTCAGATCAGCTACAACTGCTCCTCCTGCAGTTTGATCAGTCCTGACTTATCCTCTGCAGCACCTGTTTATGTTAAAGG
9047	TGCAGGAAGTGGATTTTCCTGTCCGGATCAATGAAATCATCACCGCAGTGCATTAAAAGTGCATTAAGGATGCCACTCACCGTCATGTCATGCACA
9048	TGCAGGACAACTCTGTCTCTGAAACTAGTTAAAAACAAAAAGTCTCAGATTTCCTGCTGGAATCTCACTGAACGACCAGCTTCTGTAAAAACGTTC
9052	TGCAGGATGGTGGCCCTCGAGGACCAGGTTTGGAGACCCCTGTACTAAAATGTGCTTTTGGGATCTGATTGGACAGAACAGCAAGAAGGCAGAAAG
9064	TGCAGGACTCGGCCCTCTGAGGCTCTGATAAGGATGGAATAAATATGCAAGACTGCTGTAGAAATGGCTAAATGCAATCTGAGACTTGAAAACACA
9065	TGCAGGTATTAAACCTGAGAGGTTCTGATGAAATGGTACCAGACCAGAACATGTTTAGTTCTGATGGGAACTTTATCATCTCTTAATTCTGTTTTA
9069	TGCAGGAGTGGTCTTCCCCTACTACCCTCGGGAGGGGCGCTATAAGCTTAACTACCACCAGGCGGAGGACGCCTGCAAACATCAGGACGCCATCCT
9072	TGCAGGTTTACATCATGATCATCGATGCACACAGACTCCTCTGTCACTCACAAGTTCAGCTTTACTGTAGATTTTACTGCAAGATCTGGAAATGGA
9074	TGCAGGAGAACGGAGCACGCGCTCGTCTACGTTCAGATTGGTTTATCTGTAGGGCTGTAGGTGAAAATCAAAACGCGAGTTCTCTGCGGGGTGACA
9078	TGCAGGTAGCGAATCTTCTGCTTCAGCTCGGTGGTCTCAGAGTTTAAACACTCCTTCTCCCCCTGAAGTCACACAAACCCGAAACAAGAAACAAAA
9092	TGCAGGAAGAGTTTGTGCAGGGATCTCAGCAGCCTGCGGGCCGACAGGCTCTGAAGGTTCTGGATGGGTTCCAGCAGCACTCGGCGGATCAGCTGC
9093	TGCAGGATCTGTTCTCAGAGTTTGTTGTTTATGATTGTCAGCTACTACCACCTGTAAAATCTACTCACTTATTGCCATATTTCTGTTTGCTAAAGG
9094	TGCAGGCAGCCACTGCACTTCCTTACAAAGAGCCTGGAAGAATACAGAAACACAAACAAATGTTCCTTTATGTTTAAATTTATTTATGTCAAGAAA
9095	TGCAGGCAGAGCCATCAAGGTCGTGTGCAACGTAAGCCAGGTGGCAGGCGTGGGAAAGGCCCCTGGGCGCACACATACCTAGTGACATAAACTGGC
9100	TGCAGGTTCCAAATTACAAAGGCTTTTATGTGCTGCGACAATAAAAGTATAATGTTAAAAGTTACCCACGTTTTTTGTCAACATTATAAAACTGCT
9103	TGCAGGTTGCAGAGGGGAAACAGCAGCGGTAAAGTGTGCTGTTGACATTTTCTGAAAGTGCCTGAAAGCATTTTTTGTCACCAGTATATGGTGGAG
9110	TGCAGGCGGACGCTCCTCCTCTGTCTCCGTTCCCGTCGGTCCGAGCCCAGCCTCTGTCGCCCCGTCGAGTCAGTCAGAGGCACTCGCTGTACGTTT
9125	TGCAGGACTATCATAATATTTCTGCTGCTGTTCAGATGAGGGTGTGAAGATTTTAAAAAATGGTGTTCCTTCAAACTTCTAAAAAAGGTTTGAGAA
9129	TGCAGGCATGGGGTGAGCACTAGGGAGTGTGCCCCCCAATCCATGTTTCTCCTGCTTGGTGCTGGGTGGTTTCTCTGCCAGGGGCTGGTGTGGGCG
9141	TGCAGGCTGCCGCTGTGGCTTCACGTCCCGTCTGGTACCCCCTCCGTGGTCCTCATGTTTCATTTTGTAGTTTTTGCTGTAATGCCAGTTCCTTTG
9142	TGCAGGCACGGGAGGCCATTCTCCAATTACCTATCTGAGTCATGTAGTGATCCCCGAACAATCAATAACTACAGTTCGCTGACTGAGGCTTCCAGC
9144	TGCAGGAAGGTTCTGCTGAAGAAGTGGTTGCAGATGTTTCCAGCTCTGTAGACCAGTTCTCCTTCAGGTCCTCGGAGCTGGGCCGTCTCCGGTGGG
9149	TGCAGGGATCCAGCCAACGTGTGGGCTGTTGAAACCTACGTGCTACATGAGTGCTGAAGCTGATACAAGAAGAAATTCACTTTGTTCTATAACAGA
9160	TGCAGGCCTCACCTGCCTCAGTGAAGGTCAGAGTTCAGGATTCAACAGGAAGAAAGAGACGTTCAAAGGTGAAAACCACTGCTGGGCAAAAACACA
9161	TGCAGGGAGGATCAGGATCCCCACCATGCCCTCAGAGCGACTGCTTTATTCTGCAGAAATAAAGCAATTTATTATTATTTTACTTGGCTAATACTT
9176	TGCAGGATTTTTAACAGTTCCGTGTTTTCTACGTCTTTAAACGTTCCGTGAAGGAACATCACTCACTGCCTGTTGATGAGTTTTGGACAACCTGGT
9183	TGCAGGCCATTAACTGTAACCTGATGTTGGGATTTTGTCTTTTTGAGTGGACCGGGTATTGATCTCACTGGAAATTTTTTTTGTCTTCTCCTGTCG
9192	TGCAGGCTTTATCAGTTTGAAGGACCAGAAAGCCATCTGAAGGCAAACCTGGAGCTGGCATCTTCTGCGTCGTGAAGAATTTGGTCCTTTGGGTTC
9199	TGCAGGATAGAGGCCCTCGAGGACCAGGGTTGCTAAAAAATAAAAAAAATCTGAGTAACTCATCAGCGATATTTTGAATAAGTCACTGATGTGAAA
9203	TGCAGGTGGGAAACGGGAGCGCCGTGGGGCCGTCGGAGCGCGGGGACCTCAGCCTGGAAGTTATCGACTGCAACGTGAGCTGCATCAACAGCTCGG
9210	TGCAGGCGACGCTGCACGGAAAAACCGTCCTGACATCTGATCCATAAAGCAGCGTGGGCCCAGGAGTGCCCCGGAAAACCACTTCCTCTCAACACA
9217	TGCAGGTGTACAGGTCTTTGGGTGAGGGCAGATTGCAGCCGGTCATCTTCTCGGCAGAGCGAATGATACGCTGCGATCTGGTCCTGTCTTTGGCAG
9221	TGCAGGATAGTGGCCCTCGAGGACCAGGGTTGCCTGCCCCTGCTATAGTCGTTGCCTTTTTTTGTCTGTATAATTTATTTCATCAGCTCAGCCCCT
9232	TGCAGGTAGTGCTGGGCGATATAACGATCCATATCGTGGGGACGATAGAAAAGTGTCTATCGTGATATATTTTCTTCTATCGTTTCTATCATAATT
9236	TGCAGGATCCCACAATATTACACGAGATCAAGCAACATATTATAAGGTTTGACCAAAACTAATAAAACTTCAGCAACAGGATGTGACGTTTTTATG
9238	TGCAGGTTCCGTCTGCACGGTCGGTTTCTCCTAAAGCCTCGTGTTCTGACAGTCAGCTGCAGACCTGGACCCAGACCTGGACCTCATTCTCATCCT
9249	TGCAGGAGCAGCAGAACAGAGCGTGAGCTTCAGTCCAACAGGACCGGCGTTCCCTCGGCGTGGAGACCACCTGTGACGCTGCTGAGCTTGGAGCCG
9258	TGCAGGCGGGAGAAGACCAATCGGATCAGATTATAAACGGGTTTAATCCTGACTGACGGCTTAAAGCCCGTAAACTCGTCTGCTTCTGTAAAAAAA
9266	TGCAGGTGTTTGCACTATTCGGCTCGCCTTTTGCTAGCCAAACACGTGCGGACCGAACACGCGACAGACAATTTATGGAAAGACACAGAGTCAGTA
9271	TGCAGGAGACAAAAAAAATTGTTGCGATTATAATAAACATCTATTATCTGTAGATTCACTTGTAAAAGACACAAGAATACTAACTGAAAAAATGGG
9291	TGCAGGTTTACTCTGAAACACGTGAAGCAGCTTCGATCAGAGAAACAGCTTTGGCAACAAGAGACGGATATTTATAGATTCTCCTGCAGCGGGTCC
9295	TGCAGGTGCGAGGGTACACCTCATTGCGAGCCATGACCCCCAGAGGCAGGACGAAGGGCAGGGCTTCAGAAGAACTGCTGCTCCCACTGGGGCCCA
9297	TGCAGGAAAATGAACCTCAGCTTTAAAGGAGCTAAAACTGCCTGATGACAGCGGAATGAACGATATTTATTAAAAATAAATAATGTCAGCTGGGTG
9315	TGCAGGGGGCGCAGACAACAGGACGGTTATCAGAGCTGTGGGGACGCCTCGGGGACACCTCGGGGACAGCAGTGAGTCAGGAGGACAGCTCAGGGA
9317	TGCAGGTTTTAGCTGTTTCTCTGCTCTTCAGCCGGTCGTCATGTTCTGCAGGAACCTGTTAATCACTCATTCATTCAAATCAGGTGCATTAAAGCA
9322	TGCAGGCTGCAGGAGGTAGCACCTCCCACATGGTGAGCTTCTCCTACTTCAACGCCTTCAACGCGCTCCTCAACAACATGGAGCTGATCCGCAAGA
9326	TGCAGGCCTTTTTAACATAACAGTATTTAAGTTATGCAGTAGTCTACACCCCCTGCTTACAGCTGCAGTCAGACATTTACATCCACTCATCATTGA
9330	TGCAGGAGCCATCATAACACGGCACCTCAGCAGAGCTTCTCTCGCTCAAGTCGAAGAGGGGAAAAAAATATTACCTATGAGCTAATTATGAGAGTT
9344	TGCAGGAGTCTGGAGGTAAAAGAGCCAGGCAGACAGGAGAGGCCCTGTTTTATGTTATTTGTTCTGTTTTGTTTTCCCAAATAATCCACACGCACA
9345	TGCAGGTATCCGGCTGCTCTCATTGTTGGTGAACACAAATAAAGTCTTCTACTTTTTCAACTTGTCCATCGTCGTCCTCTGCAGGTATCGGGGATT
9366	TGCAGGATCTGGTAAGCCACAGAGCAGTTGCTAAAGAGGGCCACCATGCACTTGATGCACTGATACGCCCGTTTCTGATAGTGGTTCTTGGAGCGC
9369	TGCAGGGTGGACGTACGGCTGAACGTTGGGGTGACTCTGAGCGGGGTCAAGCGGGTTGACTCGACAGTTGCTGTAGTCGTACGCCCCGAGCCACAG
9372	TGCAGGGTTTCTATGGTAACACATTTAAACACCAGGACGTCAAAATGGTCGTCTAGACCCTCCCCTTTTGATTGACACCACTTTTGACCAATTAGG
9375	TGCAGGATCTGGGTTACGCTCCAGACTTCGTCCAGGTGGCTCTGGCTCCGTTCATCAACGACATCCACAGGAAAGGTGAGGGCACGACGCCGCAGG
9378	TGCAGGAGGCAAGCAACCGATGAAACGTGAAGACGAGCGTTCAGACCTACTTTTCCTCAGCAGAAACGTCGGATGTGAAAATCTGCCGCTGCAGCT
9380	TGCAGGAAATAGTTAGTAATTTAGGTGATGAGAATGCTGGCTGCAAAGGAATGAAGGAGAGAGAGAAGGAAAGAAAGATACAAAAAAAGTGAGAAG
9385	TGCAGGATGTATAGTCTGAAACAGGAGGAAGTCAGAGGTTCTGCACAGGCTTTCAACTAACCCGTGCTGCTGTTTAAACATTCTCAGCAATAAAAT
9390	TGCAGGCAGCACCAAGAAAGTCTCACTGGGACAGAAATAAGTCCGCCTCGTGGACACATTCTGCTGGTTTTAGCCCACAGATGCATCCACCACCAA
9391	TGCAGGCCTGTCTGTGAGTCACTGGAGGCTCTTTGTTGTCAGATGCTGCAGACCAGTCATAACAAGATCCTGAGCGCGATCCGCTACTGGAAACAC
9392	TGCAGGCTGGCCGAACCATCTGCTGCAGCTCAGAAAGGCTTCGGGAGGCTTTTATGTTGAAAGGACACATGAGAAGCAGAGCTTTTAATGTTCAGG
9393	TGCAGGACGAGCCCCAGGCTGCATAAAACAACAACAACAAAAAAAAGCTACAGCTGCTGTTTAAAAGTTTGGAAATGCTTGTTGATTTCACATAAA
9397	TGCAGGAGGTAAACATTAACAGACCTCACCAGAGAGAGGCCAGCAGGAGGATGGAAACCTGGGGAATTATGATAATAATCACTGAAACCGATAACT
9399	TGCAGGAATATCATTTCTCCTGACCTATCAGGTTCCTGCAGACTTATGATGAATGGCCCCAACTCTTATCTGGAAACTCGACCCTCCTTGATTCGA
9408	TGCAGGAGATGCTGCGCCGAGCCGACAGGGAGGGCGGGCGGCCAGAGCTGTGCCCGTCGCAGAGGATCGGCTGCGACGGGCCGGCGGCGGGGGGCG
9411	TGCAGGTGACCTTACTATGGGAAGATCAGACACGGCGCCACCTGCTGGCCAGCGCCAGACTCTACTTCCTGCCGGAGGACACGCCGAAGGGCCGGA
9412	TGCAGGGCGTCGGGCACACAGGTAGGACTGTCTGGCTCTCCTCCAAGTCAACAATCAGACGACTGTGGTGTTTATCTGCAGGGGCAGCGAGCCCCA
9414	TGCAGGATGGTGCTCCTCCAGGTGTCACCAACCAATCAGAATCAGCCCAGCTGGTATAAAAGGACATCCAAGGTACCTAAATTAACATCAAAACTA
9417	TGCAGGGTCTCATCTGGACTTGCTGTCCCTCACCTGGACCTGCTGTCTCTAACCTGGACCTGCTGAGACCTGCAGCGTCTCACCTGGACCTCTATG
9421	TGCAGGCTCACGCGTGTTGGGCACGTAGGACAGAAAAGTGCTCCAGAGGTGATGCTTTACATTTCAGCAGGATTATATCACGAGTGTGAAGCTCCT
9422	TGCAGGGCCACCATCCTGCATGTTCTCCTTGTTTCCCTGCTCCAACACACCTGATTCTGTGGTTAAATCACCTCTTCATGTTCTTCAGAAGCCTGT
9426	TGCAGGATCTGCTGGCCTTACATAATATTCTAATTTTCAGAGAAACTGAACTTTAAGTTTCAGCCGCTGAAAGCCACAATCGTCAGCATTAAATAA
9436	TGCAGGAAACAGCTCACGTCGACAGTCTTAGCTTTAAAATGAGGCCTCTCCCTGCCGGCTTCTCGGGCCAGCATCTTATTCCGTTTAAGCAGACAG
9439	TGCAGGCCATGGCTGAGGAGGACGAGGACATAAACGTCTACAACGAGGAGACGTTTGGGATGGGTGGGTGGATGTTATCTTTTATTGGTGCTGTTG
9440	TGCAGGTGTGTTCGTTTACCAAGAGGTCGTTGACACGGATAATTGAGTTCAGAACATGACGGCTGCGTTCACATCTGATAGTCCAGCGGACTCGGT
9447	TGCAGGAGGACGCTTCTGTTTCTACTCACCAGATAAAACGAAGTTTAAAACCAGAGCAGTGACCAGAGTCCCTGCTGCTAAAGCCACGGCCGCCCC
9453	TGCAGGACGGCGGCCCTCGAGGACCAGGATTGCCCACACCTGATATAGGCAGATAACAATGTAAAGTGTTGTGTTGCTTTATCACATCTCTACCGG
9460	TGCAGGTTCCTCACCACCACCTTCCTTGCCCGCAGCCCCAGCCTGCGCGGCGCGATGTCCACGTTGTCGTCGCAGCGCGTGCACGGGCTCCTGTCG
9464	TGCAGGCAGTCTGTGTTCCTCTCATGATGTAATGGAACTGGAGAGGAAACCTGAGCTGTCTTGTTCAGGCTGTGGCCCACTTCACTCCCTGTCTCC
9465	TGCAGGAAAGTTGCAACACGTCAGAGTTGTCTGACCAGATCTGTCAACATTTCAGTTTTAAGTGTCTCACTTATTGTTAGCCTTAAAAACATAAAA
9477	TGCAGGTTCATTGGCCACGTGAAATAAATGAAACCTGCCGTGCACACCATGATACCAGCAGCTTAATCCTGAGGTACAAGTACCACCGGTGGAACT
9479	TGCAGGATAAGTCAGCAGGAGCAGAAGTGTGTGTTGGTGTGTGTTACAGGCTGGCAGCTGAGGCCAAAGGTACCATGTGTTGCCCAGCTGTGTTCG
9480	TGCAGGAAACCCAACACAAAGTTAAAGCACACGTTCTTTTTAAAATGCTGGCTCGGAAAATGGGTTGTGATACTTACAGCTTGTGTGATTGTGAAC
9484	TGCAGGAAGGAACTATTTGGGCTGGCAACAAAAAAAAAAAAATACAGAATTCTATTACAAAATTTTGCATTTATGAAATTAATAAAGACGTAAAGA
9486	TGCAGGCTAACTCCGGAGGCTGATAACCAGTTAAATAAAAACCAACACCAGCTTCTCAGCCTCGGAGTTAGTTTACAAAGAGCAGAGACGTAGTAA
9492	TGCAGGGGAAGATGAGCGAGTTGAGAATGAAGACAGAACTGATCCCGACACGGAAAGAAGTTCTTCACAGAACGTGTCTGAGCAAGAACCACAGCC
9493	TGCAGGCTTCGCAGTTCTGGAACCAGGTGCTGCACAAGACATACAAAAATTACTCCGAAAGGGATTTTTGTTGGTCACATACTTCAAGTTTCCTTC
9498	TGCAGGGTCGCCCACCTGTGAGTTATTTCAGCGGGGATTAATTACTGCTGAATAATGCCCGCCAGCGGTCAGGTGGTTGGCCGCTCATGCGCCCGA
9508	TGCAGGATGGTGGTCCTCAAGGACCAGGGTTGGGACTCACTGCCTCAACCAATAGTTGGGCGTCCCAGAATAAAAACAAGCATTTTAATCTGTTAA
9518	TGCAGGAGGAAGTTGTTTACTCTCGTTTGTCTAGCCCTCGCAGCAAAGCGAAGAAAGAGGAGCAAGCACAGAAATGAGTCTGAGACCTGTGCTGTC
9529	TGCAGGAAGAGAAGATATTCAGACAAACCGTGGTCCTAAACGAAGCTTATTGGATCTGAACTGTTCGGCCGTCCTGGACAGGATCAGGCAGCGGAT
9539	TGCAGGATGGTCGCCCTGAGGACCAGGATTGGAGACCCCTGGCTTAGTATATTCCATTGTGAGGTTTTGGGTTTTTCCTTTGTGTCTTTTCTTGGG
9541	TGCAGGAGGCATTGTTTGGTATTTCAGATACAGTATATTTGAATTTCCATATAGCACTGCAAGAGTTACCAGGTAAATTATTTCTTAATTGTGAGG
9544	TGCAGGCCTGATATTCTTGAGAATGTTACTCTGACACATCCTGTAAACCTAAATATGGTTGTGGACCGATTGTACACTCACACGGCAACGGCTCTC
9545	TGCAGGAAGGCATGCATATTGTACGTGCAGGACTGGATTGCATATGTGGATTCAGATGACCTTTCTGCTGGAATGATGCTGATCTACCACATACAC
9548	TGCAGGTGTTTGTGTCGTCGGGAGGAAGGCAAACAACGTCTCCAACCCCACTAAACGTTCTGAGGTGGACTGAATGAGTTGGGTATGAGGTGAAAC
9561	TGCAGGATTTATTCAGACTCCGACAGTAAAAAGGTTAAAATGTGAGTTTCTCCTCCTCCTCTTCCTCCGTGTTGTTCAGATGCTGGTGAAGCAGAA
9573	TGCAGGTATTTTGTGGAGAAGAAGAGTCGCAGAGGGAAGACGCCGGTCGGTCGCCGCAGTAACAGCAGCAGCTCGCCGACGGGCGGCTCGAACGGC
9585	TGCAGGAGTCAGGTGAACATCTATGCCAGGGGTGTCCAATCCTGGTCCTTGAGGGCCACTATCCTGCATGTTTTACTTGTTCCTCTGCTTCAACAC
9586	TGCAGGACGGTGGCCCTGAGGACCAGGGTTGGAGACCCCTGGTCTAGGTGTATAAAGACATATACAGTAAAGGGTGGTTCCTGTTTTGCAGCAGCC
9594	TGCAGGTACACGACACACGGCTACACACAAATGCATCCGAATGGCTTATATTTTTAACTCTCTCTGTTTGTCTGTGTCTCTCTGTCACTCAGACTA
9595	TGCAGGGAGCGAAGGTCAAATAAGCGATTACTGACAAGGGAAAGAATGAGAAATAAATCTGTCAACTTTGCCTTTTACAAATTAATGGACAGCACC
9603	TGCAGGTACGCTGAGGCAGATGCACAAGCCGGTGCACGCCGGGCTCCAGCTCAGACCTGGTTTAAAAATCAATTAAAAGCTCAGCCAAAGCTCAGC
9606	TGCAGGAGAACAACAATTAGCTTAAGATACGGAGTCATATTTTGCAGGATGCACAGCAGTTTCTCACGCCCATTCAAGGTTTTAAATATTGTTTTC
9615	TGCAGGTTCTGCATGCTGACCTTGAACCCGTATGAGTTGGCTATACTGGGCCCTTCAATCTGAGAGTGGTCTTTCTTTGGAACATTCAAAGCAACA
9628	TGCAGGCTTAGGGTGCATCAGTGTCATCATGAACTATCTATCAACGTTTGAATGAAATGAAACGCTATGGGAGGAGACCCAGGAGGACCCCACTGT
9642	TGCAGGGCTTTAGACGTTCTGCTTTTCTTTGGATCCTCCTGGTTCGAGTCGTTGATTCGCTCTTGGAGTCATTTTGGTGTCTGCTCCTGTTTCATG
9648	TGCAGGGACCCTGCTCTCTGCTAAAAACTGTCACTGTTGTGATAGTGGTTTTTGTGTTTGTGTGTGTACAATCCTCTGTGTATGTATGCACGCGTT
9651	TGCAGGCGGGATAAAAAGACAAAAAAAGCAAATCGGTTGCAGCGCCGGTAAAGACCATAATATTAAGGATGCAGGCCAAATAACGACAACTGGCTT
9652	TGCAGGTAAAACAGAACAAATCAGGACAAATGCCAGCCTGTTTGGGCTGTGATCAGTTTTCGGGGCGGACGCTGACCGAGAGGAGCTTTCTTGGTG
9656	TGCAGGGTGATAAAGGCATAAACTGCAAGGCTCTGCTTTCTGCCCTGAAGAATATAAGTCAGACTATAACTCAGCTGCAGCAACTTTCTAATAAAA
9660	TGCAGGACTCGGGAGTTTCTGAAGTACCCTTTAGAAAGACAGAAAGAAAAAGAAAAAAAACAGTGCAAAGTCTCTCTGTGACTCCTTTACTCTCTC
9662	TGCAGGATGGTGGCCCTGAGGACCAGGACTGGAGACCCCTGTTCTAGGTCATAATGCACCAGGTGTGTGTGTGTGTGTGTGTGTGTGTGTGTACCA
9665	TGCAGGAGGACGACGGCGGAGACAACACCGAGCCTCTGGAGGACTTCCTCCGGCTGAGCATCGAGGAGGTTCGTGTTTCCTGTAATCCGACGCTTC
9673	TGCAGGAAATGTGATGCGTCATTCAATTATTTGCAGCACATAGTGCCAGCTATCCTCTATTATTTGGATATGTGTGTGTGTGTGTGTGGATTGTGC
9680	TGCAGGCAGGCACGATCAGCTGGTCACCAGATTCACAAACAGTGCACATCAGTGTTCATTCCAGCCAGCCGCAGCAAACAACAACATAGCCTTGCT
9681	TGCAGGTCCCGGAAGGAAGGACTTGTTTCGTTCAGTTTCGCAGGTGAACCCAGTGTGATCAGAAACAACTCGACAGGAGGGAGGACTTCTCGTTTT
9685	TGCAGGTCTTCATGTCTGCACCCCCCTCATCCCCCAAGCCATTAGACTCCTTAACCTTAGACTCTGAACTAATCATATTTTTGCACACTTATGTCA
9688	TGCAGGAAATAAAAACACACCATTTCGTTTTAAAACTTATAAAATATATAAAAAGTCAGCTTTAAGAGTCTAAATTCAGTCATTATTCCAGCCAGT
9696	TGCAGGAATGACTTATGAGAAATAATTATTCATAAATATATCAATAAAATAAATAATTGCAAAGAAAGGATTTAATTCTCTTCAAATGACTGTATT
9707	TGCAGGATGTGGTTAGAAGTCTCCGATCCACCTCCAGGAGTGCTAAGTTTCCATTCACCTCTATGACAACAGTTTTTTGTTTTTTTTTCTCAGAGT
9712	TGCAGGAGGTGTGGTGCAGCATGGGAGCGCAAACGGCAGCCAGTTTAGCTACTTTTATGCTTCAGGTTATTTTAGCTGCTGTTCAGCTGGTTTCAG
9724	TGCAGGAAAGTCATAACATTTCTGCCAGAGTATTCATGTAATGCAAAACTAACAACAGCGTAAAGGTTTACAAAATAGCGTTCATGTGAACTGTTA
9739	TGCAGGTTGACCATCTACCTTCACCTTCATGAGCTGCATATTGTTTTGTGTTTCAGGGCTTTATCACCAAGACATGATAATGTAATAAAATAAAAG
9746	TGCAGGCCTGAGCGCCGCCGCCGCTCGTATAAGAAGAAAGAGGACCAAAGCAGGGGCGAAATCCAAAACCAGAGGCTGTGAAGCTCGGGGTTGCAA
9754	TGCAGGATCAGAAGGAGACAGCGTCTTCAGCCCACGGTCATCATTAAGAATCTGTCCACTCCTTAAAATACTGCATCTTTCAAACCTCGTTCAGCG
9764	TGCAGGCTGAGAGCGATGTGCTCGGTTACAAAAATATGGAACAATAACATCTCTAATATAAGATGGAGCCTGGTTGTTGAGAGCTTTGTATGTTAG
9770	TGCAGGGATTCGGCTCTTCTCCCTCAAAATGTCCTGGATTCGAGCGTTCGTCTTCCTCTTGCTCTCCACCCTCCTCATCCTCACCTGTAAGTACCT
9772	TGCAGGGCCCCTTTGACGTGGGCAACTCTCTGGTGGGACAGCAAGGCATCATGGAGATGATGGTGGCGCTGTGCGGCTCCGAACGCGAGGTGGACC
9775	TGCAGGGGTCTCCAGAGTCACAGTTTTTACTTTAAAACCCGAAAACAGAACCGCTGCAGAGCAGAACATCGTTATTATTCGAAGTCAAAACGTGTT
9778	TGCAGGATCGTACCTCTCCACTAATGGACACTGAAAGGATTGATCTCCACAGCATTATTGGAAAGCATGTTATTGAGCTAGCAGACACATTTATAA
9795	TGCAGGGGAAAAGTTGTTGAGCTTGCGGCTCAATAAAAAGGGGCGTAGTACTGCATATATTTTCAACTCGCTCCTAAGGAGATGTCTCGCATGTGT
9800	TGCAGGTGATTCCAAACATCTGGCTGAGAATTAACAGCTGAAGGACCGGGTTCTACAGGACCAGGTTCTACTGGACCTGGTTTCTACTGGACCTGG
9803	TGCAGGCTGCAGGAGTAGTGGCCTGCCTCGGAGGCCGTGTGGTTGCTGGCGGGAGCGGGGTTGCTGCTGGCCACGTGCTCGAAGGAGCGAGAGAAG
9806	TGCAGGTAAATTCTTCTTATTTCTGTACACTTTCCTGTAAAACAAAACATTTCAGTATTTACATATCTTACATAATACTGCCAGCGCTGGCTCACA
9824	TGCAGGAGATCGGCCTCAGAGGAACAGAGTTTGAGAACCAGGCTGGTTTCTGATCTGATCCTCTGCTTCCCTCCTCAGCTACACCTCCGCCCACAT
9844	TGCAGGATTTTTATTTAATAACCATAAACGAATGAGTTTCTCTGCCAAGATTGTTCAGTTATTATAAAAATATAAATATAACTGTTCAGGAGGACT
9847	TGCAGGGACAGAAACACGCCGTACCTTTGGAAGCACGTTAGACCGGACCATGCCTCTGCCCCTCTGATTGGTCGGTCCGTACGCTGGGCTCAGCGG
9854	TGCAGGTCAGGAAAATGAATTAGACATTAAATGATTTATACTCTGAGACAAGTGACTTTTCTGTTGATTTTGAAAGGAGCTCTCTTACAAAACACA
9857	TGCAGGAAGTCTGTAGATCTGCTGATCAGGACCACTTTAAAACTGGCTGCTTGGAAGGAAGGGTGACAGGGATAATATAAGAAAAGTAAACATAAA
9859	TGCAGGATGGAGGCCCTGAGGACCAGGACTGGAGACCCCTGCTCTAAAGAGTCCATCGGACCCAGACTTATTCATGCAGAGGTACCTGCTCCAGAT
9875	TGCAGGACGAAACCAAACAGCCTCTTGTTGTCCTGATGGGACGAACACTGGACCACGCTGGACAGAGGGAACTGCAGAGGGACAGAGGACGTCAGC
9879	TGCAGGAGGACAACAGAAGACAGAGGAACCCTGGAGGGACAGACTACAGGAAAAATAAATTGTTGTTTGTGAGCCGTAGCTGCAGCGAGCGGTTCC
9882	TGCAGGGATAAAAAGAACTCCAGACTTCCATCGAGTCAAACATGAACAATAATTGCTGCTGCATATTTTGTAAAACACATTTTTTTAAAATCGCTG
9891	TGCAGGATTGCATAAGCAGGATTGTGATGCATTGTGTGCGTGGGGCCTTGTGTGCATTGGGTGCACAAGGCCGTTACACTTTTGAAATGATGGGCC
9892	TGCAGGGCAGAGCAGAAATATTTAACAACAGGGATCAGGGAGGAAAATACAGAAAGGCTGGCGTGTCTGTGCGTCGTGAAACAGAACGTTTGGAAT
9901	TGCAGGACGCCACGGCCACGAAGAGCCGCCCGTGTCTCCGCGGTCTCCTCCGTGTTCAATAACTGATATCTCCTTCCACAAGCTCTTCCTCAACTG
9902	TGCAGGATGTTTACCAGTTTGACAGAATTATTGTAAATTAGAATAATTATGTCCACTAAAGCTTAAATGTCCACTACTTAACGATGACATTACCTT
9905	TGCAGGTTCAGTTTCAAGTTTTCTGACCTGAAATTCAACAAAGTTCAACAGGAACTTAGGGCTTTTCTGTAAGAATTTAAGATGAAAAAAGGAAAT
9915	TGCAGGGGGAGTGAAGGGGCGGGGCGAACATGGCGGTGACGTCACGGCAACGCCCCCAACGATTGGCTGCTCGGCAACAGGCGTCTGCGCACACCG
9920	TGCAGGTTGGAGGCCCTGAGGACCAGGACTAGACACCCTTGGTTTAAAGTGATGATCTTGAGATCTAAAGTTGGTTGAATCAGATGTTTATAACAA
9922	TGCAGGAGGACGAGGCTTTCCGGCTCCAACAGTCCGCTCTTATTCTGCCCCAGACCCGCTTTGTCCAGGGTCTTACGGTTTGTCTTCTTGAAGGCC
9923	TGCAGGAGGAGGCTTCCAAATGCCTAATCTCCCTCCGACAAGTCCGGAAGTCAGTTGGTGGATTTTCGCATCGTCGCAGAAGAAGCCGGGTGGGAC
9924	TGCAGGTACCCACACCCAGCGGGGCCACCGATTCAGACTCTAAATCCTCCCCCTGATTGTTTCCGATGAGTGAGACCTCAGCGCCAGCTGGCTGCT
9934	TGCAGGTATGGACACCTTTATGATAGTAAAACTACAGTTTAATGCTTTTATTAATGCAATATAATTAGAAGATTATTTTAGTTTTGTCTTCAGAGT
9937	TGCAGGCTGATGTCAGCTAATCTGAAAGAAATAAAGTTGTGTGCTGCTCAACATGGCTGATTTTCACACTCAGATGCCACAAACATCCTTTTTTTT
9938	TGCAGGACACGACCTCGGGCTGCACTGAAAGTGTTACACCTTGATGTTGCTGCCACTATTTGTGTTTGCAAACAACCATAGCATTTAATGGAAATA
9941	TGCAGGGATGTTTCGAGAGCCACAAACCCTGAACCGAGCCCAGATGGTACCCCCCCGTTTCTGCGTCCCGACTGACGTCAGAGAAGTTGTTAATAG
9951	TGCAGGGCTCCAGTAGATTTTCCAGCTTTGCCAACTTGTCATATTCAGCTGGGGTTATCATGGCTAAGTTGTGCTTCTGCTGGGCCAGTGTTGCTT
9954	TGCAGGTCATTTAACCCGATGTTAATGGCGCTTTCAGAGTGATGCTGCTGCAAGTTCTAGTTCAGCTTCTGAAAACATTCATCCAACGGCTGCAGC
9960	TGCAGGACTGTTTCCAGTTCAGTCACGTTTATTAAACCCTTTTAAAAATGTTTTCATCTGTTTATTTTTTATTATTCTCATGCATCATGCAGGAGC
9985	TGCAGGAGAGAGAGTACAGGTACATCATGCAAACGATGCGTTGAAATTCCACTTTCCTCAGTCTTCGAACTTTTTAAATTTTTTGCTCTTGTTGTG
9990	TGCAGGGTGATAAACCCACCCATGAGGTGGTGTTTGAGGCTGATGCCGTGTGTGATGTGACCTGAGACCGGGACTATTCCTGTGCTGTCTGTAAGC
9993	TGCAGGAGGGAGCAGCTATAGGAAGAAGGGTTTTTTTTAAATTATTTTAGTTGTTTTATATTGAGAGGGGACTACGAAATTGTACTGCAGCCAGCC
9995	TGCAGGTCAGCTCAGGACTCACAAAGCTCTTCCATCAAAGTTTATTCATACTGTATTGTCTTTCTGTCCTCATTTTGTTTGTTTTTCTTCCTTCAA
9999	TGCAGGCGTTCGTAAAAACAAAAATAATTGAAAATAAACATTTTCTAAACAAAGCTGCTGTCATTTTAATGTTAAAAAGCGAGATTATAATCTGTT
10005	TGCAGGGCTGCAGCTGCAGGGACAGAAGTCCTTCCTCTGAGTCCACAGACAGGAAGTGGGATGAGAGATGAAGGTCTAATGTCTCGGTTCAGAGTC
10014	TGCAGGAGCTGGGATGCCTCTGAAAAACAAAAGGAAATGTTTTCAAGTTTTATCTTATACAACACAAACCGAATTAAAAAGGAAGGCGATACACCA
10023	TGCAGGGACACAGGTGAGACGGCCCGGGTTTGTCCCGGTCTTCTGACCCCAACAAGTGGACTAAAGCCGGTCCCTCACTGGGCTGGTTCTGTTGGA
10028	TGCAGGATGGTGGCCCTGAGAACCAGGAATGGACCCCCCTGTTCTAAACAAATCTTCTACATAGGCATGGTTTAAAAGACTAATATTAATAAATGC
10032	TGCAGGGGCAACATATCCACATTTAGTTTTTGAAATAAAAAAAAATAAATGTCTTTTTATATTAAAGCAAGATCAGCCAGACATTTTTATCTGGTA
10044	TGCAGGATTCCCGTGGGATGGGAGTCAACTTTACTGTTAATCACGTGATCGGTACGGTACAGGATAAAAACTTAACGGGAGCGGGAACAAACCAAA
10070	TGCAGGACAAACGCAGGAATCGTCAAACACAACTTCCTGAAGCTGCTGAGGTGGTTCCTGTGGAGTCCCGAGCCTTTAACGTCTGCTGACCCGGTT
10074	TGCAGGGGATCAGCGGGGCCTTCAGCAGCAGCGGGATCAAGGTAAGACCACCACCTGCTGAGACCCAGACCACCCGCTGAGACCCAGACCACCCGC
10083	TGCAGGACGAGGTCGTCTCACCTTACAGAAACCTTTTTTAATGGTGCTGAAATCTGGAAGAACATAATCCCTCAGCAGAGTGTTGTCCTCCCCCTT
10086	TGCAGGATGGTGGCCCTGAGGACCAGGATTGGACACCCCTGCTCTAAAGAGATGCAGCAGACAGGAAGTGTCCAGCTGGAAACGGTAAAAAGCTCC
10091	TGCAGGCTCTGAGGATCCTCATGAGCGAGCGGCGGTGGGAGCGGGTCACCCAGGTGGCCCAGCGGTTTTGCAAACAGAGCCCACTTCTCAACAAGG
10112	TGCAGGATTGGACCCCCCTGCCTTAAATGATCTCTGATTTGACTTCTGCAGCTGTGGTTGTTTCTGAAGTGCTTTCTAAATAAAGCAGCAGCAGTA
10115	TGCAGGCACACTGTCCCACTCGACCACAAAGTGCAACAATTCTTCCCCAAACGTTTGAGCCCAGGAGACGAGCACAGAGCTGCCAGCAGCTGCAGG
10119	TGCAGGAACAGGAAGTTCTGGCTGGACTGCTGTCTCCTGGAGCTCCTTCTGGACCGAAGCAGACCCAGGTCTGGTCCAATTTAAAACCTTCTGGAC
10125	TGCAGGGAATATTCAGTTTTCTCTGCTTCACCTGAAACATCCCATTGGCTGAAGCGTCTCTGAGGACGTCGGAGCCGTTTGGTCGATTTCCTTCTC
10132	TGCAGGATGGAGACCCTGAGGACCAGGAATGGACACCCCTGTTATAACGGAAGATCTTGCTTGGAGTTCTACTCTTCAGTTTCTGAATAACGGCAC
10139	TGCAGGTGGAACATCCGTGTACAGAGATGATCGGAGATGTAAACTTACCAGCTGCTCAACTTCAGGTAAACCTCTGTTATGGACTTGAAAGCACAT
10142	TGCAGGGGGCGCTGTGGGCAACCGCAGGCTGGACCTCCACACAAACATTTATATTTACAATATATGGCGATGGGCAGAAAAACATTAAAACAGTTA
10151	TGCAGGAAAGGGGAGGGATCACCTTGCAGGGAGTCCTGAGAAGTGGCAGATGCTGTTGCATGCAGAGGATTCAGAGCCCAGTGCAAGTTTCTTCTG
10155	TGCAGGATGGTGGCCCTCCGGGACCAGGGTTGGAGACCACTGGTGTAAAGAGTAATGTTTTTTTTTAACTACTACCTGCCAAATGCATTTATCAAT
10156	TGCAGGGACGAAGGTAAACGATTCGGACTATGATTCGTCCTACAGTCACGACGTTAACTCGTGCCGTCTGCGCGCCTCTCTGCAGAAACGAAGAAA
10173	TGCAGGAAGGGATCGTGGGAAAAGGTTGTTGAAATGTTGAGCTTTTCTTCTCGGTAGCAGGAGGAGTGAAGCTGGTCATGTTGGCATACAAGGGAG
10178	TGCAGGCTGCAATTAAATTTTTAGTGTTTTTGCAATCTATATCATCATAAACATGATAAAACCAAGAGGTTCAGACATCAAACAGTGTTAATTTGG
10181	TGCAGGATGGTGACCCTGAGGACCAGGATTGCCTACCTCTGGTCAAGAAGGACAGCTATAACATCTGGCCATCATTGAATTGTTCTTTATGACCAA
10197	TGCAGGATGGAGGCCCTGAGGACCAGGACTGGAGACCGCTGCTTTATATTCTTAGACTACTTTTCTCTCTTTTTGTTGGCCGGTAACCGCTTCCTT
10201	TGCAGGGTTTTGTTACAGTACAGAAGAAGTTAAAGTTCAGACGAACCCCCTGCCATTATTACTAAATTGCCTTTCGCTGCTCATAAGCTCATTATT
10205	TGCAGGGTTGGAGAAGTACCGGTGTGACACAAGCTGTTTTTCTGACACGAGTCCAGACACCCTTTCTATTCACAGCTGATGCTGATGTCCACAGAA
10213	TGCAGGCTGCTCATGGTCGTGATGTGCTGGGACTGCTGCTGGTACTGGTGAGCGGCGGGTCCCGCGGTACCGCTGGGCGCCGACGAGCCGTTTGGA
10221	TGCAGGACACCTGCAAGTCAGTACCGACACTTTCCAACTGCAAACCACCTATTTATACATTTAAATGTAGTTTTTTTGCAAGTGTTAACCTAAATT
10222	TGCAGGGACAGAAGAGGCTTTTGTCTAACGGGAAAGGTCAGCGCAAAAACAGAGTCTATAAATAAACAAACACGACTCGTTAACCAAACAGTCGGA
10227	TGCAGGCTTTACTTGTCTCCAACACACCTGATTTGAATCAATGGGTGATTAACAGCTGCAGAACATGAAGAGGTGATTTAACCACTGAATCAGGTG
10230	TGCAGGTTTATATGGAGAAGCAGGAGGGGAGGTCCGCAGCGCCTCCCACCCTCCTGCATCACTTCCTGCCCGAAACTGCGTCAGAAAAGCTGCAAC
10233	TGCAGGAAGCTGCACATCACATGTTCTCCAAACATGGGCAGACTGGGACGGCTCTCGCGGGACACGTGGACGGTGTAGATCGTCATGACGACAGGC
10234	TGCAGGACTTCCTGCAGTCGGATCCTGTTCAGTTTTTGTGCCGGCCTTCGGTTTCGGTGCACCGGAGTTTCGATTCTGCGCCGTGCTCGGTTGGAC
10243	TGCAGGCACCTCGCTCCTCTCTGAGACATGTGGTGGAACTTGCGTCGTGCTGTGTCCATGGGGCATTGTTTTCCCATATTTTGACCACAGTAAATT
10245	TGCAGGGTTCCTGTCGTCCTGCAGCAGCATCCTTCAACAGAAATTAAATCAATAAAAATGAGATTATTCAGAGTGTCTTATTTATGCACAAACAGT
10257	TGCAGGAAAACAAAGATAAAAGGGAGAGAAAGGGGAGATTCGTGTCGCGCGTTTCAGGAAGAACGCGGCGGATTGTTGTGATTGTTTCGGCCGTTT
10265	TGCAGGGACACAAAATCAGACCCGGTGTCGAAAAACGTGAGCGGTCTCGGCGCGCTGCAGCCCTCGGCTCCGCGTTCGCGGCCCCTCTTACCTCCA
10268	TGCAGGTGGTGGGTCCACAGGAGGGCTGTCCCCGACCGGACCCCCTGGCTGAAGACCAGCCACCATGATCCCAAGGGTGATCCTAACCTGGGGACT
10274	TGCAGGGCTCGGGCCACCTGGTTGCTCCGCCGGTCCACCTCCGCGTAGGTGAAGGCGCGACCCTCGAAGTGGATGAAGACCCTGTCAGGCCGCCTC
10285	TGCAGGTCAGCAGTGAGAAAAAGTCTGAAAAAAACACCTAAACAAACAAAAAGCACTTAAATACACAAGATTTTGATCCTGGAAGCTAAAAAAAAA
10289	TGCAGGATGGTGGCCCTGAGGACCAGGATTGGACACCCCTATTAAAGCCATTTATGGGTAATGTTGGGTTGGATTGGCTCCTAAAGTTAATAACTT
10291	TGCAGGCCGCCCGAGCGCTGGTCATCATCTGCCTCGTCGTCGGCCTAATCGGCTTCATAGTCTCCTTTGTTGGAGCCAAGTGCACCAGCTGCCTGA
10294	TGCAGGGGGGAAAAAATTACAGGTGAAATCAAAGACAAACAGTAACTGTTTGTAGGCGTTTACCATTTAGCCAGTAACTGCCGCTGATTAAAACAA
10301	TGCAGGTTCTGCACAGCAGAGGTCCGACGGACCCGGCGCCTTTCAGGGCGGCATCACGCCAATGACTCACTTCCACTTTCCAAACAGAGAAGTTTT
10311	TGCAGGGCCTGACAGTAGCACTGATTACTCACATTTTAGTTTACATATATGTGTATAAAAAGGTAAATACTGACCAAATCTGTGATTGAGCTCCCA
10325	TGCAGGTTTTACTTGTTTCTCTGCTCCAACACACCTGATTTGAATCAATGGATGATTAACTGGCTTCTGTAGGACACGAAGAAGTGATTTAAGCAC
10335	TGCAGGAATTTCATAATATTTCTGCCAGAATAACCATTTAATATGAAATTGACGGTATTGTAGAGGTTTTTCATTTATTTGCTCATGAAACGCTAT
10339	TGCAGGGTTGTTCTTGGAAGCAACGTATGGGACCCATTTATTGAGCATAATTGCGGTGCTTCTGGGAAAGGAGGCAGTTGCTTTGGATTAGCAGGT
10347	TGCAGGAAGTGATGAATAGTTTCCGGGGTAAAGGGTTATTTACACGCAGCTTCAGCATGCTAACAGAAGAGAAACGTTTAACTAATTTCAGGGGAT
10352	TGCAGGACCACCCGGACCAGGTGCGGCCCGGCCCACACGAGCTCAGAACCGCTGCGGTGTGTCGGACTCACAGCACGATGCAGCTTCAGGAACTTT
10361	TGCAGGTCACCTGATGATCAGAAGGCTTCATTTTACTGGAGATGCTTTTACCCTTCATGGTAGGAGCCTGAAGGACCTGAAAACTGACTGTTTTAC
10368	TGCAGGTTTTAGATGTTTCCCTGCTTCGACACTCCTGATCTGAATCAATGGGTGATTAACAGGCTTCTGCAGGACATGAAGAGGTGATTTAACCAT
10378	TGCAGGTCTTCAACTCTCAAACGGCACAGCTTGCACCAAAAGTGACGTCACAGCACCCATCACATGGGGCACGTTTATGTTGTTTCGGCTGGTCAT
10388	TGCAGGCTCTGAGAAATACGAGAAAGCTCTGGAGGATGTGAGGCTCAGCTCCTCCCTGGGGTTTCTCTGCTTTCTGTCTTTATCCTGTTCACTTCA
10390	TGCAGGTTGTGGGCAAACATCGAGAAACATACAATGTGTCTGTAAATGGCTTGGAGGAAGGAAGGAAAAACAAAAGTGTTCTTGTCTCTTAAAAAC
10396	TGCAGGACCTGAAGGACGTGACTCACAACATTCTCTACGAGACTTACCGTGTACAACGTCTCAACGAGAGCAACATGAACTTCAGTGAGCTGGTCC
10397	TGCAGGGAGCTCAGCTGCTGCTTCAACCACTGTTGTGAACGATTGAACACATTTCGCCTCATGTTTTAGGAGTTAAGTGAACTTCACAACTGTTGA
10406	TGCAGGGGAACCACGGTGCTGCACGGAAGGAAGGAAATGGATCAGAACCTTTTAGAACCTGCTGGATCAGAACCTGAAGTTAATCCCTGCCGGATC
10407	TGCAGGAGCTCGGATTCTTCCTGGACAGAAACGTTTCCGTCAGCCCCGACCTCAGCTTTAAAAGCACCCCCCCCTCAGAGTTATTGAATAACAGGC
10408	TGCAGGCAAATAAAAGCTGCCAACCTGACCAAAAATGCAATTACAGTTCACACACAAACACAAATGATTCAAATAATGAACTATGCTCACATACAG
10413	TGCAGGATTGTGGCCCCTTTAGGACCAGGATTGGACACATCTGAACTAACCACATTTACAGTGATATGCCAAGACTGAAAAGTTTCTCCACAATCA
10427	TGCAGGCTGGGGCTCCGACAAGGTCATTAGCTACTGTGGCTCCGAGGCCTCGCCCTTCAAGCCCGCTCAGTGCTCCCTCGGCTGGGCGTTCTACGC
10435	TGCAGGATGGTGGCCCTGAGGACCAGGATGGAGACCACGGCTCTAAACTTCTGTTCCTGGTCCTTGAGACTCACTGCATCACTGGTCTAAGTGGTG
10457	TGCAGGATCCGAAAGAAAGATGTTCATCACGACGACCTTAACAACAACAACTCTGACTGCAGCTCAGCTGATCGGTGTCGTACAAAAGACAAACAT
10459	TGCAGGAAGCATTCATCAAAGCTGCAGGGAAGAAGAGTAAAACGTCCGTGGAGCTGGACCTGGGCGACATGCTGGCTGCTCTGGAGAAACAGCAGC
10460	TGCAGGAGACATTATTGAGACACAAATTATTTAGGACTGCAGATAACAAACATATCATAATTCAGTTATGGAACAGAAAAGCCATTGTGCACTGCA
10464	TGCAGGCGGAACCACGGGCTGCTGGTTCTGTGGTCTAACAGCTGGAAGCAGGTTGATCTCTGGGATCTGGACTCTAGAGACATAATAAGGTTCCTG
10467	TGCAGGACGGCGCGGGGAGGCTGACAGTCCAGGCAGCGCCCGGGACCCTGACAGGTCAAACAGTGCTCGTCACAGGCTGAAAACACGAGAAAACAC
10479	TGCAGGATGGTGGCCCTGAGGACCAGGACTGGCCACCCCTGCTTTATGGAAACAGATGTAACTCATTCATGGAGAGTCAAACTGAAGCCTGTAACA
10482	TGCAGGATAAAAGCAGAAACAGCTGCTGAAAAAGCGACTCTTTGCTCAGATATCAGAAGAAAACATGCAGGGAAATAATATCAGATCAGACTTTAA
10488	TGCAGGTTGCTGCCCCCTTGGTGTGGGGTCATTCGTGTATGTGCCCGGGCCACGTCCCGGAGTGGTGGACTCCTGCCAGGTGGTTTATGGCTCCTG
10497	TGCAGGAAGGTGTCTCTCCAGGACCAGGGTTGCCCACCCCTGCCCTGGACTGTCCAAAGTCCACCGGAATGAAAGCACGCCCGTCAACTCTTCCCC
10501	TGCAGGACAACAGCTGCCTGCTTCCAGTGGGAGTTCTGGCTGAGCGTGCTCATGCTGATCTCCCGGTCCAGGTAGATGTGATACCAGAAGGGGATC
10511	TGCAGGCTGAACAAAAACCTCCAGATGATCAGACAGGAAGAGAGCAGGAAACCACAGCCCAGGATGACAGATTTCACCTCCTGCTGTGACCTGCTG
10514	TGCAGGATGGTGGCTCTCCAGGACCCCTGGCTTAAAGGGATGTCTTGGCCATTTCGAAGTGAGGTTCTGTGGAAAGGTTTTGAAGAATTAACGTCT
10522	TGCAGGAGGTGCAGAAGATAGAAAATGAAGAGCTGAAGGTGCAGCTCATGGTGTTTCATGAGCAGGCTGAGGATGACTCTGAGGATCTCAAAGCTC
10530	TGCAGGGTGGTGATGGCGAGCTGCAGCACGACTTTCAGATCGATTCATCACCTAATACGCTTCACACGCCCCGTTTTAATTCATGAAAAACACCGG
10536	TGCAGGTAGTCAGCAGCGACTCTGCCTCCTCTGTGATCTGCTGGCTGCCTGACACGGGCCAAAAAGTCAAACAGTTCAACCGTTGCCACGGCAACG
10538	TGCAGGATGGTGGTCCTCCAGGACCAGGATTGGACACCACTGCTGTAAACTCTTCACCTGTCAGCAACTCGTTATTCAGTAAAATAAAACCTGGAG
10544	TGCAGGAATGTCATAATATTTCTGCCAAAAAAATCAAGCCAGCACATTTAGTTTTACACTAGCCATTAGCTCATCAATCAGGTCATCATTAAACTC
10549	TGCAGGATGGTGGCCTTTTGAGGACCAGGATTGGAGACCACTGGTCCAGGGTGTACAAATCTCTTGCACAATGACTGCTAGATACAGGCTCCAGCT
10550	TGCAGGATAGTGGACCTCCAGGACCAGGATCGGACACTACTGGGTTAAAGTCAGATATTTTCTCAACTATTCAAACCAATAATTCTTACAGTTTCA
10564	TGCAGGGTGGCACACAAACACGAAACACACACATACTGCGCACACACAGCTTCTTCTACCTGCCACTGAGCTATTTTTAGTGTTTCAAAAACATAC
10565	TGCAGGCCAAGGAGGATACGGCTACAGATCTAAAGGTTCTAAAAGAGTGGACTCGCTTTTAGAAAACCATTTGCTTTTGAGTCTTTTTGAACTTCA
10577	TGCAGGTAATATTCTATCTCTTTCTTGATGTTGGGGATCCACTTTTTCACAGAGGAGGCTGAATTAAGGTTAGACTGTAAAGTAAAAAGACAAACA
10586	TGCAGGATTAAACGGATCTTCCCTTGCTCTTGAATGGAGGCAGGGAAGCCACCGTTGCCCGGCCCTGAAGGCCCAGGGTGCCCTTTTGATCATTTC
10592	TGCAGGTGATGTCCACGGTCAGTACTATGATCTCCTCCGGCTCTTCGAATATGGAGGCTTCCCCCCAGAAAGCAACTACCTGTTCCTGGGAGACTA
10594	TGCAGGAATGTTATATTATTTGCCAGAATAACCATGAAAAACAAAATTGGTGGAGGTTAAAAGTTGAAATAATAGTGTTCATATGAACAATTCAAC
10600	TGCAGGTGGCAGTGTAACTCACTCAGTGTTTTTACACGTCCAGGTGACACTGTTCCAGTGAAAGTGTACTTGCACTTGGTGGATTCATGCATAGAA
10603	TGCAGGTTCTGCAACCTGAATGTTGTTCGATCAAAAACAAAGAAAGTAGAGAGGCTTTGTCAATTTGTTGTACGTAGCAGCTAGAAGCTGCTGTAA
10610	TGCAGGCTGTTTTACATCCCCAGCGTTTTATTGTTGAGTTCCAAGAAGCCAGTTTCCTTTTGTGGCAGAGAAAACGGGCCTTTGGTTTATTAGGGT
10613	TGCAGGTCAGCTTGCACAAGTCTTTGGGGAGAACGCCTGCGTACTTCGGCAGCCACTCCACGAAGGTCTTCACTCCTTTAGGATCCGTCTGGGGCC
10623	TGCAGGAGGTCATACAAAATAACCTAAATAGGTTTTTTAAAAACAACAAATGATTAAAAAAAAAACAATCAAACTAAAAAAGGCAAAGGGATTCAA
10632	TGCAGGATGCAACGGCAGGAAAAACTGAGTGCATCTATAAAACAAATTAAAGGCAATTTTGGTGTGTCTTTGATTTCTGCATTTAAAATGGAAAAA
10633	TGCAGGACGATGTGTCCCTCGCTGCGTCCTTGTCTTCCTGCTCCTTCCTCTCCTTCCAGCTCCACTTCCTGTTTGTGAGGAAACATCTCTGCAGCC
10638	TGCAGGCCCTGGAAGGAGATCTGCTTGAAGGCGTCCGACAGGAGGCCAAACTGGGCCTTCACGGTGTCCATCTGCTCATACATGCGCCGCTGCTGC
10642	TGCAGGATGGGGGCCCTCGAGGACCAGGGTTGGACACCCCTGCTGTAAAGTAAGCGGTACAAATAAGAAACATCTGGAGGAGCATCCTGCAACTAA
10647	TGCAGGGCGGCGAGCAGCCCAACCCAAAGAGCCTGCTGGCGGCGGCGAGCCGCACGTCCAAGACCACGCTGGGACGCCTGGGGGTCTTCTCCGTGT
10648	TGCAGGCATTATAATTTACTCTAATCACGGCCTGCTTCAATGATTACTAGTTTCCTATTCAAACATCATCATCAGCATGACTAAGTGAGCTTCAGT
10657	TGCAGGAGCTGGCGGGACAGCGTCTCCGTTATCCGTTCGGTGCCGTGCGCACTTTTGGAGAGCGTCAACAACCGAGCTCAGGGAAGGAAAGCCTGG
10683	TGCAGGGTGTCCAGGTGAAGCCCAAATCATCACCTATCCACCATCATTCTTGATAGTCATTACAAAGCGTATTTTATTCACATGCTGCTGTGAATT
10696	TGCAGGCCTTTCATCCTCTGGTTGACTTGCTCCTTTCTCTTCAGACTAAAAAAGGGGTTCCAAGGTGGCAGTTTGGGCAATTGCCTGTGCACAGAA
10712	TGCAGGGCGGGCAGGAGGATCAAACACGCCGATTAAACCTGCGTCCGACTGGATTTTGCACCAAAACATAACGACCAAGCAGAACCGACCGATTGA
10715	TGCAGGGCTGTGAGTCTCCAGTGAGCTGATAACAACTGAACAGGCACACTTCTATTGTCCTGGTAGTAATCATTACTCGCACGCACACACGCACAC
10718	TGCAGGTCGTGCTACGTGGTGTTCCCTTCCCTGCAGCTGGCCCTGGCTCTGAGCTGCATCATGGGGCTGGTCATGTTTGCTCGGTACTGTGGAGAG
10723	TGCAGGAGCAGAGGGAATCTCCTGCTTCTGTGCCGCCGCAGATATTAAGGCACTTACATAAATAAGATTAAAAATGGAAGTGTTGGAGGGGGTCCC
10733	TGCAGGAACGGTGTTTGCGTGTTTATCATCAATTCTTAAAAAAATAATTTTAATCTACTTCAGCTGATCTGTTTTTATCTTCTTATGATACTGTTC
10734	TGCAGGAACACGAAGGCTGTGGTGTTGTTTTGATCCCGCCAATTTACTGTGGACACGTGACCATCTGACCACATCCGGTAGAAAGATGGGAATATT
10735	TGCAGGATGGAGGCCCTGAGGACCAGGATTGGACACCCCTGGATTAGATTATTTCTGATGAGACACAGGGTGTGCTTACATTACACTTCTCCTCAG
10744	TGCAGGTTTTACTTGCTCCTCTGCTCCAACACACCTGATCTGAATCATGGGTGATTAACAGGCTTCTGCAGAACATGAAGAGGTGATTTAACTTCT
10749	TGCAGGTGATTTCCTTTTCTTTCGTGCCGCTGCAGCAGCTCGACTCCCCCGAGCAGCCGTAACTTTGTGATGTTTGACAGGCCTGTGTGGAGCAGA
10754	TGCAGGGCAATGGGCTAAAGTGTGTTTTTGATTTTCTTTGCTCATTTATGAACCCATTCTGAACGTCTCTTTAGATTACTGTAGGTGTAAGAGAAC
10762	TGCAGGGACCTCAGTGTTATGAAGTCAGACAGAGGGTCATGGTTCCTCTCTGGTTGACGTCTTGTAAACACCAGACTCTTTGGGTTATTGTTTAGA
10769	TGCAGGAGCACCTCAACAAGGGCATGGACATAAACGCCGCTGAGGAGGTGTGTGGGTTGTTCCAGCCCTAATTTGAAATGTGTTTCTGTTATCCTG
10773	TGCAGGTTGGTGGCCCTCCAGGGACTCTGTCTTAGGCCATGAGAGGTGGGCGATCATGTAATTGCCTGTCTGTAAGCTAGGACTGATCACTAAAGC
10780	TGCAGGAGTTTGTGATGATCGTGGTCTTCGGCTTGGAGTACATCATCCGGATCTGGTCTGCTGGCTGCTGCTGTCGGTACCGAGGATGGCAGGGTC
10790	TGCAGGTTTTACTTGTTCCTCTGCTCCAACACACCTGATTTGAATCAATGAGTGATTAACAGGCTTCTGCAGAACTTGAAGACCTGCTGAAGAGCA
10791	TGCAGGAACCTGAAATATATAAAAGTGTCGTTAAGAAGGTTTGACCAAAACGGCGCCAAGTCCCTCGCTTCTCTTTACGAGAAGGTTTTCTTTGCG
10793	TGCAGGTAGACTCGGGTTCTACCGGAGCGGAAACAAAGTTCTGCTGTTCTGGAACTTCTGACCCAGAACTCGGAGTTCAGAGCTGGTTCCGGACGA
10796	TGCAGGGTCCGGGGCCCGATGGAGCATTGCACCGAGGCGTCCTTCTTCGGGTTGACCTGCACCGCCACGTCCTTGGTGTTGGCTTTCCTCAGCCGC
10803	TGCAGGCTGGCTGCTGTGTAGGGTTAAATCCATGTAAATGATTGATGCAGAAAACCACTAAAAACTGCTCTGTTGGGTTATTTGAGGGCACGAAGT
10804	TGCAGGGAGGGAAGTCAATCTCAGGTGCAGTGTGAGCTGGGTGGCAGGTGAAGGTGGAGTCTTGGGTGTGCAGACTTTACTGACTGGAGGAGTAAA
10809	TGCAGGACCTTAGCGCAGGGGCAGGGACAGCGCGATTGTTGGTGCGTGCACCCTCGCGCAGTGAAGTAGATAAAGGTAGCGGTTTTGAGGGAGCTG
10811	TGCAGGATGGTGGCTCACGAGGACCAGGATTGCCCACCCCTGTGCTAATGCATCATTGGACACATCCGACTTGCAGGCGTGACCAGACTCCTGCTC
10813	TGCAGGATCGCTTCCCGGCCCGGGGCCTTTCTGGGTGAAGTTTGCATGTTCTCCCTGTGCACACGTGGGTTTACTCTGGGTACTCCGGTTTCCTCC
10816	TGCAGGATAGTGGCCCTCGAGGATCAGGGTTGCCCTTCCCTGGACTAGAATCTAAAAAGTTCTGAATAAATGTTAACAGGTTCAGCTGTGAGTATT
10818	TGCAGGTCGGTCCTCTTGTTCCTTTTCAGCTCGTTCTGCTCCTGCTTCAGGCGCAGCTCCTGCAGCTGCTGCCTGAGAACACGAGAACAGGAACGG
10824	TGCAGGGAACTTTGGGTGCATTTGAAACTATCACAAGTTTTCTTAAATAAAGACCAAGACTCATTAAAACATCCATGGTAAATCAAAAAAGCCTCA
10828	TGCAGGCTCGTATTTATAGCAGCCGTCTCCACAGACAGTTGTTTTCCTCCATCTCTGCACATAATGACACTCGAAGACCGCAGCTTGCATCTCAGC
10834	TGCAGGATGGTGGCCCTCGAGGACCAGGGTTGGAGACTCCAGCTTTAAATAAACTTCCTGATCCTTGCTCCTTTTTTTGGGTGGGGGGTATTTTTG
10836	TGCAGGTGTTTTTTATGGAACATGTAACTGTAAATGCTTGGCACATAATTATAAGGTATCAAGTGTCCAAATGCATTAAAAAAGACTACCTTGTAT
10846	TGCAGGCTGCTGGCCTCGCCGGGCCGCAGGTGGTAGGCGTTGATGACGGAGCCGGCGTCCGACGCAGACATGGCCACGGAGCAGTACGGGTACTGG
10850	TGCAGGCACAAACACGCCGCCCTGTCTGGCCTGCATCTTCTCTCCTAACATCTTATTTAACCTAAATCTGTCACATTCCACAGTAAACAAAGACAC
10852	TGCAGGTAGAACTGAGAAAATGAAAACAAATATTAGCATTCTGTGCACAATCTATTAATGTATGCATGGAGATGCTTGTGTGTTAAAGTATGCCCC
10854	TGCAGGGAGTCAGATGATTGTTTTTTCCGTCGCCGTTGAAGCTCTTGTTTCACAGCTCTGTTGCTTTTTTTGTCTTTCAAGATAAAAAAAAACAAC
10856	TGCAGGGATGTCTCATATCTGCTCTGTGTGTTGTTGTCCTGTTCTGTATAGTTTTCAAAGACAGAATAAGAATCAAATAAATCTTTTTTCTCTTCA
10857	TGCAGGAATAATATGCTGACCAAAGGGGGAGATAGGCCACGGATGTTAAAACTTGGAAACTACTAGCCATGCATTGAGGGTTCCATCCCAAATCCA
10866	TGCAGGAGACAAATAATGGCGTACGGAATATATTTAAATAGCGGTTAATCTCATCAGTGTGGGAAGGAATAAAATAGGCTATTGTTATTAGGCTTA
10882	TGCAGGATGGTGGCCCTGAGGACCAGGATTGGAGACCCCTGCTTCAAGCAGTTGCTGCTTTGGAACCCTCCAACATTTCTTTGGACATTTTCTCGT
10884	TGCAGGTGCACAGTGTGCAGCTGCGTTCAGGCCGCCTCCACCTCCTGCCGAAGGGCCGTTGTTTTGTCCCCGTTTTGCTGTTTTATGTCGTTTTCA
10886	TGCAGGACAGGAATGGCTGAAACGTTACAACCTGAAGAGAAGAAGAGGTTTCCTCAGACTGAGGCCCGGCGAACCTAAGCAGAGCCAGCACTGGTG
10893	TGCAGGAAGGTCGACATGCAGACATCAGCTGTGCTTTAAATGCAGAAAGGAAATAAATCTAAATCCTAACGATCTGCTGACAGTTTCCAACAGGGA
10899	TGCAGGGATTATGCTTCTTCTCTGGGAATTCCTCGGGATCCTCCAGGAGGAGCTGGAGAGGGAGGTCTGGGTTTCTCTCCTGGACCTGTTGCCTCC
10901	TGCAGGTATCAAAAATGTACTAATTATCTTAATTTTAGCATAAATATATTTCTGAATAAAGATATTGATGGATAATTTTAAAGCATATTGGGTTTT
10905	TGCAGGCGGCGGACGCTCAGAGGATCGAAGCAGCCGTCGCTGTCGACGTCCGCGACTGAGGAGGGATTTTATTTGTTTGTTTTTTATCAAATATCA
10907	TGCAGGCCCCGGCTCTCTCGCTTCTGACATTTGCTCTCAGAGGAGAGAGACGGAGGGAGAGCCTCGCGATGAAACGAAAGATGAGCGGCTTCAGGA
10910	TGCAGGTGGTCCGAGCCGCTCTCACCGTGGTGGCTGACGGCTGCTTCTCCAAATTCAGAAAGAGCCTGGTCCCTGGGAAAGCTCACACCTCCTCGC
10920	TGCAGGGGACAGGCCCCGGCTCCACCACAGCCGACTCAGCTTAAGGGTTTTCTGTCACGCCACCAATTTGTGACGCAGGTTCTTCTGAAGAGTTTG
10927	TGCAGGACTGGGGCCGAGCCGGAGATGTGGCGGCGCTGGGTGTGTGTTGGCACGTGCCCGGCCGGGAGGAGGAGGACTTCGTTTTCCAGCTGCTGT
10935	TGCAGGATTAAAATCGAACACTGCTGACATAAGCTATAGGGTCAGAGCAGTTTTGAGCCTTAAAACCTTCATTCAGTTCTTAAAATTTACTCTGCA
10941	TGCAGGTTCTGTGAGGGAGGACTCGGTTAGCATGGCGCGGTTTTCGTTCGAGCCCGCGCGTGGGGGCTCCTGAGAGAAAGCATGGACGGTCTCACC
10944	TGCAGGAGTCGAGAAGTTATCCGTTTGTAATCATCCTGATGATTTTTCCATCACTTCGTTTGTTCGATTGCAGATCAGAAATGTGTGAAAGTTTCT
10955	TGCAGGATGGTGGCCCTCGAGGACCAGGATTGGACACCCCTGCACTATACTATCCCTGTCAGAAAGCTTGTTGCAATCAGGTTTGAGTAGATGGAA
10956	TGCAGGTCTGTATAAACGTTACTCAGTTCGCGACAGAGAATCATGTAATCTGTGTTTACCTACATCCTTAGACTTTACTTTTCATTAGTTTTTCCC
10957	TGCAGGCGTTCACGATCAGCTCCAGCTGGAGGAACACCATCTGTGTGGCTCAGCAGATCCCGCTGCCGCCCGACCAGCTGGCTCTGCTGGCCAGAG
10959	TGCAGGCAGGGTAGCAATCCAATGGAAGCGACTCAAATGCGGAGAAGAGGGTGTGTGAAGAGTCCCATATGATCCTGTTCATTAACCTGCATAATA
10961	TGCAGGTACCTCCAGCTGACCTCATTCGTCGTCTTGTTGCCTTCCGACCCGTCCCACTTCTCTGTGAGTCACTTTTTCCTCGGCTCCATTCATGCA
10962	TGCAGGAGCATGAGGTCCTCTGTACGGTTGACCCCCGTAGCCCCCGGATGCGCCACCAGGTCCAGGCCCATACTGCCCACCGTGAACTGGGGCTCC
10963	TGCAGGATCTTTGAATTACCGACTGCTTCTCTTTATGTACTCTTTATGCTGCACCACAGTGTTTTATGCTCGCATAAAAACAAGAGACTGACTATT
10965	TGCAGGTTTTAGTTGTTTTCCTGCTCTTCAACAGGTCTTCAGGTTCTAGAGAAGCCTGTTAATCACTCAGTCATTCAAATCAGTTGAGTCAAAGCA
10971	TGCAGGGAGGCCATGTTCTGACCCCACTTCCTGCTGCTACGCCTCTGAAACCAGGTTCTGCTGTGAGTTCCTCCTCAATCTTCTGCATCTCGTCAC
10981	TGCAGGTGAACTCATTAAGACCTCAGACTGACTCAGCACACGGAGGCTCGACATCAGCCTGCGTACAAAGAAACCATCATAATTAGAGCCCAACGA
10989	TGCAGGTTCAGATGCCTGACAGGAAACTCAGCCTGCCACTCACCTTTACAGGTGGGTCCATAGAAGCCATCGTGGCAGAGCTCACAGGCTGTCCCC
10992	TGCAGGTGAATGGAGTTAAACCAGTTTGCTTTGTTAAAAGTCGTAGTGTTGATATGACCATGTACTGGGGAGAGGCACAAGCAGGTTAGGGGATCA
10994	TGCAGGAAGCTAAGAGCACTGAGCTCTGCGTTTCATTGGTTTAAACTGGGTTGTATAACCAGGTTTTATTCTGTGTGAGAAGCTCTCAGGTGATGA
10997	TGCAGGAAGTGCGTCAGGCAGCTGCTGCTATTTGTGTTTGCAAAAAACTGTGGATTTCTACTTCAATGAGACAAGCATTTCTTAAAGGAATGCATA
11001	TGCAGGTGTTCCAGGTAAGAATGTTTTATGATACAGATCTAATTACGTCATATAGAAGTGTAGCCTACAATGCAGTGGTAGGGAAATATACCTGAA
11022	TGCAGGGTGTCTGTGTGCTCAGTGCACGCGCACCGCGCTGTGCTGTGAGGGAGTGAGGAAAACTTGGAACGCTGTCGTGTGTAAGGGGCGTGTTGT
11043	TGCAGGAATGTGGAGAGAATGGATCCTCAAAGTGTTGTTTCTTTATTTCATTTTTCCACTATGTGAGCCCAAATCCATTATACCATCAATTTTGTT
11048	TGCAGGTTATGTTTGCAAAGACGGCAATTTGTTTTATTTGGATCATTTAATTTGCCAGTTTGAAACTGAAATGGTCCAAAATAAGTTGTTTATTTG
11056	TGCAGGAACTGTGAAAAGAAACTAGTCACTGCGACGATGCAAAACAGGACACATATGCTGTCGATCTGCTTCCGCTGCTCGTCTAGATCACGGATG
11057	TGCAGGTCGTTGTGTCGGAATGCGAAGGAGAAATGTGAGTCGGTTCTGGGGATCGTGGGCCTTCAGTGGCCCGAGGACTCTGACTGCAGCCAGTTT
11061	TGCAGGTCCAGCAGACTTTGCTCAGCCCTCTGCAGACCCTCCAGGTCCTTCGTCAGCTTCCCCAGGTCGTCTCTGGACTTGCGGGTTTGAGCGTAG
11063	TGCAGGTGACGTGCAAGTGAAAGAGAATAAAACCATTTCGCCCAGGATCGGTGCAACATTTAGACCATTTTATTTAATTTAAGATGACGTAAAATG
11064	TGCAGGACGGGAATGACCGGCGGCTGTCGCTGCTGCAGGAAGTAAAGCACCATCAGGATGTAAGCGTAAGATGAGAGGCTTCCTCTGGAGGCATCC
11084	TGCAGGGAGCAGAAGAGCATCTGTGGACTTTAATCTTTCATTTTTCATCTCTTCATGTCGAGGGTTGGTGGTTTTTGGGGATTAGAGGCCACATAA
11088	TGCAGGAACCTTTTGCACTTTTCTGCAAAACAAACACAAAAAAAAACCATCAGGGCTCTATTTTAACAAGACACAAAAAGGCCGCATTCACTAACA
11089	TGCAGGTGGGACGGTGTCTGAATCCAAAAGGAACAGCTGGCTGTCTGGATACAGCTGTGATCAAGTCCAGAGAGACACAGCAGGAGGATGAGAGGA
11093	TGCAGGGACAACTGGACCCCATCCAAGAGGGCAGCAGAGGCAAACTCCATGTGACCCCCAGCAGCCACGATGCAGAAGCCCCAGGGGGCCGCAGTG
11096	TGCAGGATGGTGGCCCTCCAGGACCAGGACCGGACATTTCTGTACTTCTTATTAATTTAGATCTCCCACATCCGTCTTCAGATTTAACCCTCGCCC
11105	TGCAGGTTCTACAGGCTGGAAACTGTGATGGGGCAGTAAAGCTCGTGGGATGAGATCAGTGTTTGTAAGAAACCAGTGAAATGGACGTTCAGGAGG
11106	TGCAGGATGGTGGCCCAAAAGAACCAGGGTTGGAGACACCTGGTGTAACACCTCAGCACTCAAATCTGCGACGGCGCAGAAAGCAGCTGAACAAAC
11107	TGCAGGAGGGAGCACAGCCCAGCCTGACCTGAACCATCCCTGAAAATAACCAGTTTCTCATCAGCTGCCGGTTCAAAACATATTCACCGAGGTCAT
11111	TGCAGGACTCTGGACCTGGGCTTTGAGAAGGATCTGACGGTCGTATTGAACAGTCTGAACTCGACTGGACCGGCCCGACAGAACGTTCTGCTGTCT
11113	TGCAGGCCGCAGGGATAGCCGCGCCCTTCGTACTCGTAGGCTCCGAGCTTGGCGCGCTCAATGGCAGGTTCTACAGCCACATTCACGACGTGTAAG
11119	TGCAGGGATGAAACTTGTGCTCAGTGCCAGTTTTTTATCCTAAAGGATGAAACGCATCTTATGAGACGTATTTATTTAGATAAAATAGATATAGGA
11120	TGCAGGGAGGAGGAGACGGATTCCTGTTTCTCAGGTTCAAACCTGCAACTTTTTCTTCTCCTGTTTTTATGCTTCAAAGTAAAGACGGAGGAACCA
11128	TGCAGGACGGCGGCCCTCCAGGACCAGGACTGGACACCCCTGCCCCACATTGACGGCCTGATGGTCCGCCTCATGCAGACACACACACCCTCTCAC
11134	TGCAGGAGTTTCAGTCATTTACCTGTAAAGTTGCTGCATTCCTGACAAACAGGAAACTGGTTAGTTCTGCTGGGAATAAAAACAGGAAACAGGATT
11141	TGCAGGATGGAGGCCCTGAGGACCAGGACTGGACACCCCTGGTTTAACGGATAATGTAAACATCCAAATTTTTTTTAGTTTGGATAAATGTTTCTG
11142	TGCAGGCTTCAGACTCCGAGCTGTGAAACCTGAGGGGTTTTTTTGTTTGTAATTTTCAAAACTCCTGGCACCGATGGTAATTGGAGCGCGGTCGTG
11146	TGCAGGGATTGGTTGTTAATATAATCTACTCATATTTGGTGTTTTTCAGATAATCAGTACGATGAAGATGATGATGAAATCACTCCTGATCTGTGG
11158	TGCAGGTAGCTTGCTTCACCCCGGGCTTCGTTTACCAAACTGTAACAGCCACAGTGTTGCGACACACTTCCAGCTGTCGTGTAGCTGTCCAGCATC
11190	TGCAGGTGTTCAGATCTGTGGGAGCAGCTTGGAAGAGACGCTTCAGCTCTTTCTACAGTTTCAGTGTGTGTCTCGCAAGGATAAAGCACACTAATG
11192	TGCAGGTGATCACTACAGCTCAGTCTGAGGTTATTAACTCCGGAATCATGTGACGGACAAACGCTACATGCGGCTCAATCCCAAGCGCTTCCGGTT
11204	TGCAGGATGGTGGCCCTGAGGACCAGGATTGACCCCTGGTCTGAAAACTCAGCTGGAAGGAACTTTATTCATGTCCTGAGCTTCACACTTACTTAC
11205	TGCAGGTTCTAGCGGAATAGTACATCAGGCCCTAATAGTTAGAATTTCACAAATTAGTTTTTCATGGACTCACCAAGAATATGGAGCTAAATTGGG
11207	TGCAGGAAACTCTGTCCTTATGAGACAGCAGTGGCAGCGCTGGTAGAAAATGTCCGAACACAACTGTGTAAATAAACGAGAGGACAGCTCTTGGTC
11226	TGCAGGGGGCCGGGGCTCCGGGCTTGAGGGGCCGATGTGTGTCTGTGCCTCCGCTCTTCCTTGTGTCGTCCTCATGTCCTGGGGGGTGGAACTGGG
11227	TGCAGGAAGTGTCCCAGGCTGTATCGGAAGTGCGACAGCTAGCTGCTGCCACCACTCTTTGTGCACAGAGGCAGCAGCAGTCAATCACAGAATCTC
11234	TGCAGGATTTAGCTGGCGTTTTTTGAGATTGTTGCTATTTTTTTTACTAAAATCAATAAGCAACCATAACTTTTAACATATAAAGCAAAAATCCTT
11270	TGCAGGTCCCTGAGCGCTCAGATCTCCTCTCCGTCTCCTGTGTGGATAAGTACTGGCTGCAAAGGCAACGCTGCTCTTTGATATTTCACTCCTAAT
11276	TGCAGGAGACGCTCTGCTGCTTCCCATCATGGAGGCTGCAGGACAGGACATCAGCTGCTGGTTCCACCCCAGAACCAAAGATGTGAGTCAATTTAA
11279	TGCAGGGCGACATTAAACCACACCAGCTGATTCGACTCATCACAGAAAGTGGAGCTACGCCCAGCCAGCGTCAGGACGCGAAGGGGCGGAGCCTGT
11280	TGCAGGAAACAGTGGAGAGAATTTCTTCTTTTGCAGGAATTGAGTCAACTGGCTTTACCTTTTAGAAAGAGGAAAGAAACAAACAAAAAAAAAGTT
11281	TGCAGGTAAAATCTCACATCCTCACATCCTTCCTGAGAGATAATTTCTGATCACATCATTCGTCCCTTTCAAACGTCACCTTAAAACCAAATCTGA
11284	TGCAGGAGGGGAGTCCTCCAGGACCAGGACGGGGGTCCTCCAGGACCAGGACTGGGGTCCTCCAGGACCAGGACGGGGGTCCTCCAGGACCAGGAC
11295	TGCAGGAAGTGCCACAAGCTGCAGGGGAAGTGCTACAGCTAACCGCTGCTGCTTTCTTCGCTTGCAAATAACCACAGAATTACATATAAATAAGTG
11313	TGCAGGACGGGGTCTGCTGCTCAGCGCCGACGCGTGACGCTCTCACACAGACGTCCTGGCCGGCGGACGGGTCGTGCAGTTTGTCAGCTCAGACGA
11314	TGCAGGGGGGAAAAAAAAACAAAAAGATTTTACATCTCATCAAATAACCATTTAATGTTAACATTGTTTGGCTGAGTCATGGTAAAATACTTCCAA
11316	TGCAGGTTGTCCAAAAACAGGGTCACCTTGCCGTATGCAACATGCCTCGGGGGTCAGAGGGTATGTGGTCTTTACAAAACTTTAAACTGGAGTTTT
11324	TGCAGGTGTCAGTGAGCTAACCTGATTTATTTGCTCTGCCTGAGAGCAGGCAGCCTTCGGAAAGCTGGAGCCTGCTCTATTGGCCGCTTGTGAAAT
11336	TGCAGGATGGTGGCCCTGAGGACCAGGATTGGAGACCAACGGTTTGTGAGGAATTGTCAGGTGGGGGTGGAAAAAGAGGCGAACCCAGTGTGCAGA
11337	TGCAGGGTCTCTAATCCTGTCAGTGAGATGTCAGCGTTTAAAACAGTGACGTGTAAACCAGCGTCTGATAAAGGTTTGTTTATAAAAGTGATATCT
11340	TGCAGGAACGCTCGCCGAAGATCGAGCGCGCGGCGCTGGATGGCACCGAGCGCGAGGTTCTGTTCTTCAGCGGCCTGGGGAAACCTGTGGCTCTGG
11350	TGCAGGCTTGACGGTGGCAGCCTCCTCTCATTACACAGGGGGAGGAAGCCTGACAACCCTCCCCTCCCCAGGACCCCCACCTTCACAAACTCACAT
11355	TGCAGGAGCTCCACTTTGAGCCGTTTCTGGTCTAAAAAGGAAGCTTTTAATAACTTTAATCCTCCTAATTCTTCAGTTTTTGAAGCTTTTTTTTCT
11360	TGCAGGGACAAACACCAGGTCACCGGGGGTTCTGGAGAACTTTCAGGACGGGCGACATGCACTCTTAGGCTTTTATTTTGATAGGAAAAACCAGGT
11363	TGCAGGACAAGAGGAATTCGTTCAACGTGACAGTTTCACCTCAGCTCACTTGGAGGATGAATTCTTCCCCTTGTGCTCGTAAAACTGCGTCAAACA
11368	TGCAGGGTATCTGTATCTATTGTTGTACCTGGACGATGTCTGGGGTGTGTGGCCACACACACAACAGGAGTTCCAACACTTTATTCACATATTAAA
11372	TGCAGGAGGGATGAGGGTGGAGGGGGGGCAGGTAGACGTCTGGAGTTCCAGGTGGTCTCATCATCAGCGAGGAGGAGGAATAAAGAGATTCTGTAA
11378	TGCAGGTCGGCCGGGTTCGAGGGTGCGCTGGCGGACTCTGAGGGGGTTCTGAAAAGAAAAGAAACACAAAAAACTGAAGGCCTTTTCTTTTTTGTT
11389	TGCAGGAGCCCTCAGGTTCCAACCTGTCAATATCCCAGGCAGCATCTTGGCTCTGCTGTGGCTCAGTTAACCTCCTCACCCACTGCAACCACACGA
11392	TGCAGGTATTTTTAAGGATGATACTCATAACCTCGCACAGTTTGGCTGCAGAGATGAGTCCTGTTCGTTTTACAGATCCGGTTTCCAGATGATGAG
11408	TGCAGGATTGCAATAGTGCATCTTTGTTGCCTCGTTGGTCCTCGGGCTTTAAATCAGGGAAGTTTATTTTAAACAAAGAGGTATCACAAGAAAACT
11409	TGCAGGTAGAGGAGGCACGAGCCGGAGAGGGGCGGGGCCTGCGCGTCACAGCGCGTGCTCTGGGAACAGATCCCACCTGACTCACCTGTGGCGTGA
11412	TGCAGGGATCAAATATCACATTATTATTGCAACATGCTACTTGCAACCTACAGAGCCTTCCTCAGTCTCACACCACAGAGAGTCATATCTCAGCAG
11421	TGCAGGAAGTGCACCCAGACTGCTCTAGAAGTGCCACAACTAACTGCTAACAACCATAATCGTATAATTTTATGTAAATGCAAAATTGTCAACATC
11422	TGCAGGATGTCTTTTCCGGGTCAGAACCGAACGGCGGGGTGTAATTATTACTTGCTCTCGAGGAGAAGCCATTTCGGTCAGCATCACTGACTCTTG
11424	TGCAGGACCTTCATGCCACATCTTTGCCTCCCAAAGAAGAAAATCTTTAGATCTGCCACTGAATCAATGCATTCCTTTTTTAAGCCAGATGTTTGA
11430	TGCAGGCCACTGCTGAGTCTCGGTGGTCGCTCCGTCAGATGCACCGAATTTGTTTGCCGCTGCTTTAGTGTTTTTAACATTTTGTGAGTCTGTAAA
11439	TGCAGGTAAAACAAATGTCAGGGATTTTCATGGTTTCTTGTTTGCTAAACTAAATCTGTTCTGCGCTTTATCTGTTTAATATTATTATTACAAACA
11449	TGCAGGTTTATATAACGTTCAGATCTGAGTAAACATGTTAAGAGCCTTACAGCTTCATGTCATGTATGCATACAGTCGGTTGTGTTAGGGTAAAGA
11450	TGCAGGGAGGTTTCGGCCCCTGCGGCCCGAGCCTGCAGCTCCTGGGCCTCCAACTCCCTCTCCCTCAGCCTGTCCCGGACTTCCTTCTTGGCAGCC
11454	TGCAGGTCGGAGGTCCTCCAGGACCAGGACTGGACGCCACCGCTTCAAACACGAGATGACTTGAAAGAAGGGTTTAAAAGAAGATCATGTGCATTA
11455	TGCAGGCCTCGTGCACAGATCAGCATCCTGCACAGCGCTGATAAGCTCGTTGGCTTCATGCAGACTGATTTATCAGAGTTCATGGAAAAAAAAAAT
11456	TGCAGGGGGCGACAGAGCAGCTCAATTATTTAGCGCCACACATGATTAAGGAATATGAGAAAAACCATGAGAACGTTCAAAGACTTTAAAAGAAAT
11465	TGCAGGAAAGATAAACAGGAAATCGAGTGGAAATGTTCATAAAGCAATTAACTGATGTCTGGAGTCACGTATTTAACTCCTGTTTTGGTACCAAAA
11469	TGCAGGCCGACAGTTCACCATCCTGCCCATAACCTGTGCAATCTCGTTTGGTGAGAGGGTCAAGAGCACTTTGTGAACTTTGTTGGCAATAAATAA
11470	TGCAGGGCTCACTTTGTACTGAGTGGCTAATTAGGGTAAATGAGGAACAGGTGTGAAGACAAGACAGCAAATGATGAGGCAGGAATGAAAAGAAAA
11476	TGCAGGTTTACCTCCTTCGGCTGACTGCGCGCCGTTTTAGCTGTTTGTGAATGAAAACATTCAGCTCCTTCAGGAGACAGCTGCTGTGACTTTTCA
11494	TGCAGGTTCCATCTTCAGGGGCCAGCTGCTGATTGCAAGACAGACATTTGTTTATTCTGCCAATCATTACACCACAATCAGGGTGAGTATCACCTC
11496	TGCAGGAGGGGTCATACTGCTCGGGGTAGCAGCCGAAGGTGGGGGCCTTGGTGCTCTGACCTTAGCTCACCAAAGCTGGCTATAGAGACACATCTC
11498	TGCAGGAGGTGGGGTGTGGGGGTGGTTATACGTACTATTTTGGTTCTGAATTAAATGAAATACACTGTGAAAAAGGCACAGAAAGCGAATTAAATT
11509	TGCAGGAAGAGTTGCCATCCCTCACCGCCTTCTCCTTTTCTTAAGAAACGTCCACATTTTTTTGCACATTATTCTGGCGGTTTATTTGGCTTCGCA
11517	TGCAGGCCTGTTTGTGGTAGATGCTGGATGTGAGCGTGTCCCAGTTGCCGAACCTCCATCCTGCTCTGGCTGCCGGCGTCAAACAGAAGCAGACTG
11519	TGCAGGCAAACTGTCCTCAGGAAAGGATGCTGCTTTGAAAACAAGAAAAAAAATGCTGTTTTTGTCCCCCCGCCCCAACTTCTGTATATCAGTGGG
11540	TGCAGGAACCACTGCTGCTCCACTCACACGTTTGGTGCAACCAAAACAGAGGATTTCTACTTAAACTCTTTTCTTTAAGCCTTCAGTCTATGTTAG
11547	TGCAGGCCACCCGTCCTGTCTAAAGTTCTCCCCAGAGCTCACGGCGCGAGTAAAGGCTCTGTGGTGGCAGTGCATCGAGTGCAAGACTTGCAGCAG
11556	TGCAGGATGGTGGCCCTCCAGGAAACTGACAGGAGCTGTTACCTTACCTACACTTCTCCATCCCAGCCACATGATGGCGCTCTTGACACAACACAA
11559	TGCAGGACGGTGGCCCTCCAGGACCAGGATTGGAAACCTCTAAGTCAATTTATTGTCGCCAACCGCCGTAAAAGGTGGACATTCCTGTAATCGCCT
11571	TGCAGGCCAGAAACCTTGCGCCGCGGGACAACAACGGCTTCTCTGATCCATTTGTAAAAGTGTATCTCCTGCCAGGGAGAGGGTGAGTCGGGAGAG
11581	TGCAGGCCTACAGTGAGTATGCACGGGGTGGGGGGCTTTAGTCGTGGAAACTGATCAGGAATGCCAGATTGTATGCGTGTGTATGGAGTCAAGCAA
11585	TGCAGGGCAGACACACATTCAAACAATGCTTCTTCTCACCTTCTATAAAGCCTGTATCTCCCTGGGCTTCTCCAGCTGTTGGCAGCTAAGTACAGA
11587	TGCAGGTTCTGGAGAAAGGGTCGGACAGCATCACGGTTCATGCCCTGGGGGTCCTCACAGCCATCATGAGTAACTCGCCCTCCGCTAAGGTAAGTT
11597	TGCAGGATGGTGGCCCTCGAGGACCAGGATTGCAGACCCCTGGCTTACACAGAGGGGTGGGGTTCAAAAACAAATGTCTTCAGCTTCCAGTTCTGC
11606	TGCAGGGCGCTTCTTGTACGGCGACATCGCTCTCCTCTCAGAAGATGATGATGAGAACGGCAGCGAAGGGTCAGGCTCCGAAGACCGCACCACCAA
11607	TGCAGGCGATCAAGCTTCGATCAGTCAGCAACAGCCCTGAACCGTCTGAAGCTGCTAAAGAGGAAACCCCATCTCCCTTCCAGGTAGTCAAGCTTC
11612	TGCAGGTTGTGAGCCTACGTGGATGTGGCTTCCTGGTGGTTTTTTTTTTGCAGGCCTGGAGCCAAGCCTTGACCACCAGGCACATGCCGGAGAGCT
11625	TGCAGGATCTCTGCCGAGTCTCGCGCTGTTTTCACGTGAGGTACCTGGGCGGGGGGGTGACGTCATGCCAGGGCCCTGCAGCGGCAGCCGCGCTGA
11631	TGCAGGATGGTGGCCCTCCAGGACCAGAATTGGAGACCACCGTTATAGACATTTGTGAAAACTAAAGGCCCTTGAATGGAAGGTATTATGAATACA
11641	TGCAGGGAGCTCCTGGCCGGCTCGGCGAAGAGCGCGCTGGCCGGCGTGAAGGTGGCGTACGGCGTCTACGGGCAGAAGCAGGAGATCGTCCTGAAC
11651	TGCAGGGTTTGAGCTGTTCATGGAGCGATGAAGGTGCTGCTCTTAAATGGGCCGTCAGCTTTGAGCTGAGACACGTGGCGGTGGATGTGGTTGGAA
11658	TGCAGGATTGCCCAGGCTCCTAAAGGCGTCTGCTATGTCTTCACATGCTTCTAAACAGCACCTTTACCCTTACTAAATCCCAACAATGCAGAGTTA
11663	TGCAGGATCTGTGGGGGAACGTTCTCTGAGAGTTCCCTCCTGATGAGCCACATGAAGGTCCACGCGGTCCAGAACCCAGAACCCGGCCGGCGGCGG
11665	TGCAGGATGTCTGCTCATTGGATCATCAGTTGGTATTTTCTTTCAGTCTGTTTAACATTCACACAGGCCCACACTGATAGACTCAACAAAGGAACT
11668	TGCAGGGCAACTTGTCTAGATCCCACAAACAAGCGCAGGTTTTGTTGTAGAAAAAAAAGTATAAAAACAGCGAACAAAAGTTCTTTTGTCTCTACA
11675	TGCAGGAGCTCCTCTGACAGGAACCATCTGAAGCTACAGGTTCTGTAGAAATATTATTTATGATCAAACTGAAAATCCAATAAAACTCTAGGTCGT
11688	TGCAGGTGAGCTCGCCACAGAGCACAAGAAAGATGAGCTGATCGTGGCTCGAGGCTTTCTCCAGTCATCCATTATGATTGGGAGTTTACAAATTGG
11708	TGCAGGCAGCCCTGGGAAAAAAAGTTGTTTTTTATTCGTGCTGCTGGTGCCAGCTCCAGCTTGACCACATGACGAGGAGTGAATGGAGCGTTTCCA
11709	TGCAGGATGCATATGAGGGTAAAAAATGTCTTAATAATTTTGCTTAACGATTCACCGATTGTTTTTGGTTTTTTTGTGCATTTACTCACATTGAGG
11712	TGCAGGAAACGGCAGCTTCTGAAAACATAGGTGATCGTTTTCTGCCTCCTTCTGTTAGAGACAGAAGCAGACGAGACGGATTCCTGAGAAGACCAG
11723	TGCAGGGTGGGGAGTCCCTCAGCGTCCAGCGGCAGCAGCTCGAGGAGCTCTACTTGGCCCATCCGGACTCCATGTCCATTTTACTAGAGGACGACG
11724	TGCAGGAGGAGGCCCAGCCCCGCCCCTCTGTGGCCGAACTCGCAAGTCGATTCAAAGGTTCGAATCCTCCGCTGAACAACGAAGCTGTGAGTTTGA
11733	TGCAGGAGGCAGGAACCATAAGATCATGATTGCAGATCTTTAAGAGAAACATTAAGAAGAGTTTTGACCTGAAAAGATGAAGTCGCCGTTCACAGA
11739	TGCAGGGTGAGCGTAGCCATAGTTTGGCCTCAGAGATCTGTTTTGTTGCTCAGGTTGCAGATATACCTGGCATCCTGAGAGAGCGAAACACTTTTC
11748	TGCAGGTCCACTTGGACCTGCTTACTGTCCTGCTGCACGGCTGTTTCTGCTACAGAGACACACAGGAGGATGTTCGTGGACTTCATGGGTACCAGG
11749	TGCAGGTGGCGCTCAGCGTGTTTGTGACTCACCAGCAGTCCAACTGTCAGAGTTTCACACTTTTTTTTGGGCATCGACAGGAAACTGGAGTACACT
11751	TGCAGGTATTCACCACAACAGATTTAAAAGTCGGCTCTCAAAGATGAAAACTAAGTCAAACTAGTTCTTCTCCTCCCAGCTTTTATTATTTTTATT
11754	TGCAGGCGTCCGTCTTCGCTGAAGCCTTCCCCTCTGCACCAGGTGCGTCGTCAGGTGACTCCTGCCGCTTCGAGGCCGTTCCCACTCTGACGCAGC
11761	TGCAGGATAGTGGCTCAGTAATCACCCCTTCCAGCAGATTTAAGCTCCTCGTTACTCCTGTTCTTAGCCTCTTCAGTTTATATGTATAAATAAATG
11765	TGCAGGAATGTTGTATTTTTGCTGTGTAATCTGAAATCAACAAAGACAGAAAGAATGCAGAATGAACTGCTACAGATTTTTGACGATCCAAGTTTT
11771	TGCAGGGAGGAAGAAAAGGGCAGCATGGGAGGATGAAGAGAGCGCATGGCGGGACAGCTGAGGCAGTGATGACGTGGACGGTGGACGAGATGTCCG
11783	TGCAGGAATTTCCCAATGTTTCTGTCTGGCTATTCACGTAATGTTAAACTGAAGTGATAGAACAGTTTGAATAGTGTTTGAATGAACCTTTTAAGA
11787	TGCAGGCCAGCTGGCAGCATGGTGGTGGAGGGCTGATGGTTTGGAGCTGAAGGTTAAACTTTCTGTTGTTCCAAAGTCTCAACAGATCCAGAAGTT
11792	TGCAGGAGACAAACATCTGTACTGTGGACTGGTGTCCCACAGCTGGGTTTATGAACCTTCAGACATGCTGCTGCAGATTTCTGTCCCCTGTCTCTG
11797	TGCAGGTGGACTGGGTCCAGTGTGACGGCAGCTGCAACCAGTGGTTCCACCAGGTGTGTGTCGGCGTCACACCGGAGATGGCCGAGAAGGAGGACT
11798	TGCAGGCTCCACTCACACAGAGACAGGCAGGGAAGTTGCTGTATGGTCCTGTAGGAATAATGCTTAAGCGCCACAAAAGTGGCATTAAATAATCTC
11808	TGCAGGCTCCTTCACTCTGACAGAGATCCTATTCCCGATGTTCCTGCCATTTACTTCCTGATGCCCACAGAGGAGAACATCGACAGGATCTGTCAG
11816	TGCAGGACTTGTCAGTAGGGCCGGGCAGGACCACAGGGGGGCGTGGGGGCGACTCGCCGCTCTCCATGTTGTCGGTGAACCACGAGGAGCTGGAGC
11817	TGCAGGTCGGTCGAAGCCGCTACGCTTCACCTCGGGAAGCGTTTTGACCGTAGACCCGTCGTCCTTCGCTGCGCCGTGCCGCGGAGCATAACTCAC
11822	TGCAGGAAGTCGACAGGTTCATGAACCGCATTTGGGACAGTTTAATAGCTACGTTTTTGCCATAAACGCAATCTGTGTGTCTATTTGACTCTTTAA
11824	TGCAGGCTCGCTTCTGACACGGCTTAGAAAAACGACCTGTTGTCCATCTGAGCAGGACAGAGCAGAATAACTTCAAACTGCTCTACAGTAACAGCA
11829	TGCAGGTGACGGTTTCACCTGAAGCTCCACCCACTTTTGACCTTTAAGCTCAGATTCTGAGGAGTATTAATTAAAAGATACTTCTTTAAGTATTTA
11838	TGCAGGAATGTCAGAATGTTCCTGTTGGAATAAAGGTGTGATGCAAACCTGACACAAGACTCAGAACTTCACAGCACAGTGTCTGTAATAATGTGT
11843	TGCAGGGCTCCGCGAACAGCGAGCGGACCTGAGCGCACGGTGGAGGTGTTTATACCTGGTGCTTACGTCGGAGCAGTATTCTCCAAAAAGACGGGG
11854	TGCAGGACGTCAGCTGATGAGACAGAAACAGACACGGTTTCCCCTGCGTCTCCGTGCCGCTTCGGCCATCTTGCTTCCAGCTTTCTTTGTTTTCGT
11878	TGCAGGTCGGCGCTGTGGACACCCGTCGCTTTCTGTTTCCTTCTTTAACTCCCGCCTCACGTTTTAAGGTTTTCTTTCAGCTCTTCAGGCCTGGAA
11904	TGCAGGATGGTGGCCTTCGAGGACCAGGATTGCCTACCTCCGTCCTAGTGGGACGTGCCTAGAAAACCTCTAAAGGGATGGATGCTGGAGTCATTC
11906	TGCAGGTCGTTCAGTAAGTCACTAGCCTCCATGTCCATCTGCAGAAAGAAAATCGCATATAGATAGGGAAATTTTATTGCACTTACTGCATAAACT
11909	TGCAGGTTTTATTAAAATCTGTTCAGTGGATCATGACATATTTTTGTAACATAACCACACACAGATTGATAAAAAACATTATTATCCTGTTATTAA
11934	TGCAGGGATCTCATTATATTTCAGCCAAAACAACTGTAATTGACAAAATTAACTAAACTGATGACAATGTAAAGGTTCAAATAATAGTACTTAAAT
11939	TGCAGGAGCTCATCAGGTGAGCATCAGGTGATCTGTGGTCTCAGCCAGGAGGACAGACTCACGGTTTGTTTTGTCGCAGGTTCAATGCCGATGTTG
11940	TGCAGGCTGAACCTGATCAAAGCTCTGTTATTTTTGCAGCTTTTGGAAATCTCTTTTAATTGTCTGGAAGAGGTTGAGAGTAATATTCCAGTCAGC
11945	TGCAGGATGGTGGCTCTCCAGGACCAGGATTGCCCACCCCTGGTCTACTGTGTTCCCACAGAGACCAAACTGAGAGGTTTGTTCACAGACGAGTCA
11957	TGCAGGATGGAGGCCCTGAGGACCAGGAATGCTCATCCCTGGTCTAGCACGAAGTCTGTGTGGTTTTCGCCCGCTCTCAAAAGGCAGAACGGCAGT
11960	TGCAGGGACTCGAAGGTGTCGGCTCGGTTCACGTGTCTCATTATTCATCAGGAACAGAAATGACTGCAGCACCAACCTCCATATCTGCCTCTGTGT
11975	TGCAGGTTTTAGCTGTTTCCCTGCTCTTCAGCAGGTCCTCAGCAGGTCCTCAGCAGGTCCTCAGCAGGTCCTCAGCAGGTCTTCAGCAGGTCTTCA
11976	TGCAGGTCGATCCCACGAAGCTCTGCCAGGCGGTGAAGACCGTCCTCTTCAATCAGATGTTCATCTCCGGGCCCATGGTGGTGGCCGGCTACCACC
11977	TGCAGGAAACACAGGCTCCGCCCCTCTGAGACATTTAAAAGCACGGACACGCCAGAAGCCTCCTCGTGCATATTTAACACTGCGGTGAATTATTTA
11984	TGCAGGAACCTGGTGCCCCTCCTTTGCCACCCCAAGGAAAATAAGTCTCTAGGTCCGCCACTGCCAACACAAGCAGAAATTCAGACTAAAAAATAA
11987	TGCAGGCGGGTCGGGTTCTGTCTCGTTACCTTGGGAACAGAGGCGTCCAGCTGCCACAGCAGGGCTGACCTATCATAGGACGCAGCAAGGATCTTC
12003	TGCAGGTGTGGGAGCTGTTCAGCCTGAGAGCCAGGCAGCAGGGCTCAAAAACCCGGAGCAGCAGGCTGCCGGACAACCTGTGGGGGCCTCAGCAGC
12008	TGCAGGGTTTAGGTCTTGGTGCTGGTTGGACTCCTCCAGGGCTGCTCCTGGTCTCAGAACCTGTTTGTGGTCTTCATGGACAGGAGCTCAGAGGAG
12028	TGCAGGAGGGCGTAGGTGGTCGGAGGCGGCGCCGCAGAGTACTTGACCACAGCGCGGCTTTTCACTTCCCCATTCCCCAAGCAAATCGCAGACTCC
12032	TGCAGGTCTCATTAGGAGGCAGCAGCTGAGTTGGTCGCTCTGCTTAAATGAGCCTGTGAAACAGATGATTTTGACACAGAAATACAAGAACTGGAG
12034	TGCAGGCTGTGCAAAGATGCCCCGAGACAGTCCAGCATATAACAGCACAATGTGAAAAGAAATACAAAGAGCTAAAAAAGGAAACAGAGATATTAG
12035	TGCAGGTATTCTTGTTTTTTTATTTTATTAGTCAGTGCAGCTGAAGTGGGAACAGGTCGAAAACAGACAGCTCCTCCGAAAATAACACTCTCTAAA
12043	TGCAGGGTTTTCCATTCAGGTCGACCCAGCTCGAGGGGACCTGCACCGTCTTGTAACGTGAGTCCGCACGGAGGCTTATCTGAGCGCCGTGATGGA
12044	TGCAGGCAAAGAGCTGGAACAAAAGATGGAAAATGCACTTTACACTTTTACTGCTTATTCCATGTTTCTTTATTATTGTTATTTTATTTTTTTTTA
12048	TGCAGGCCTATCAAACACCACACATGGTGAATATTTTAACAGTGCTAAAATCTGTCACACTGTAAATTGTGATGTAAAACGTTACACAGACTGTGA
12052	TGCAGGTCCTCACCCTGATCCCATCATTCCCCAAACCGAGGCGCGCTGATTAGAAGCGTCTAATTGGAGCTCGGGAAGGCGTCTCCGGCACCGAGC
12059	TGCAGGGTGTCAGTGAACACAAGCAACAACTAACACTTATCTGTCTGGACAGAGGACAGCTTGTCCTTGGTGCAACTGGGTGAAAAGTTTGCCAAC
12066	TGCAGGTCCAGGTGAACAAAGTATTCCTAAAAAGAAGTTTCCTCTGAAACCAATCACAGTCTGCTCATTAAAGCATGACAGTGTGGTTTTATTTTC
12070	TGCAGGACGGCGTCCCTCAAGGACCACGATTGGACACCTCAGCTTTTAGGGACCCTGGTTTGGTCTTTAGTCTTCAGACGCCTTTCGAATTGGTTT
12073	TGCAGGAATGCGAGCTTGAATATCTGTTGCACTATTGGGTCCAGGGATCACAATATCTGTAAATCCGGTTAAAAAGATAATCAGACTAAATATTTG
[truncated: 7,938 more rows]
